# Supplementary material for: Viral Perturbations of Host Networks Reflect Disease Etiology
Source: PLoS Comput Biol. 2012 Jun 28;8(6):e1002531. doi: 10.1371/journal.pcbi.1002531 (PMC3386155; doi:10.1371/journal.pcbi.1002531)
Supplement: Dataset S1 — Full list of interactions and gene-disease associations in viral disease networks, including the sources of data. (Sheet 1) EBV disease network, (Sheet 2) HPV16 disease network. VH-PPI: virus-host protein-protein interaction, PPI: host protein-protein interaction, PDI: host protein-DNA interaction, MCI: metabolic enzyme-coupled interactions calculated using KEGG, or BIGG databases, or flux coupling analysis. (XLS) [file pcbi.1002531.s001.xls]

## Sheet: EBV
Type of interaction	Viral protein	Intermediate human protein	Human protein	Disease Id	ICD-9	OMIM Description
VH-PPI	BALF2	-	FBLN5	123700-604580	756.83	Cutis laxa, autosomal dominant, 123700 (3)
VH-PPI	BALF2	-	FBLN5	608895-604580	362.5	Macular degeneration, age-related, 3, 608895 (3)
VH-PPI	BALF2	-	ELF2	-	-	-
VH-PPI	BALF2	-	FBLN5	219100-604580	756.83	Cutis laxa, autosomal recessive, 219100 (3)
VH-PPI	BARF1	-	PKM2	-	-	-
VH-PPI	BARF1	-	TMEM66	-	-	-
VH-PPI	BARF1	-	ACTN1	-	-	-
VH-PPI	BARF1	-	SERTAD1	-	-	-
VH-PPI	BBRF2	-	ARHGEF10L	-	-	-
VH-PPI	BBRF2	-	PICK1	-	-	-
VH-PPI	BDLF1	-	CTSC	170650-602365	523.4	Periodontitis, juvenile, 170650 (3)
VH-PPI	BDLF1	-	CTSC	245010-602365	759.89	Haim-Munk syndrome, 245010 (3)
VH-PPI	BDLF1	-	CTSC	245000-602365	759.89	Papillon-Lefevre syndrome, 245000 (3)
VH-PPI	BDLF1	-	MAPK7	-	-	-
VH-PPI	BDLF2	-	TES	-	-	-
VH-PPI	BDLF2	-	APOL3	-	-	-
VH-PPI	BDLF2	-	PSME3	-	-	-
VH-PPI	BDLF2	-	LTBP4	-	-	-
VH-PPI	BDLF3	-	HOMER3	-	-	-
VH-PPI	BDLF3.5	-	SERTAD1	-	-	-
VH-PPI	BDLF4	-	PIGS	-	-	-
VH-PPI	BDLF4	-	MFSD1	-	-	-
VH-PPI	BFLF2	-	LAMB2	609049-150325	-	Pierson syndrome, 609049 (3)
VH-PPI	BFLF2	-	TXNDC11	-	-	-
VH-PPI	BFLF2	-	CASKIN2	-	-	-
VH-PPI	BFLF2	-	MARCO	-	-	-
VH-PPI	BFLF2	-	GRN	-	-	-
VH-PPI	BFLF2	-	LAMB2	-	-	-
VH-PPI	BFLF2	-	FBLN5	608895-604580	362.5	Macular degeneration, age-related, 3, 608895 (3)
VH-PPI	BFLF2	-	NUCB1	-	-	-
VH-PPI	BFLF2	-	GRN	607485-138945	-	Frontotemporal lobar degeneration with ubiquitin-positive inclusions, 607485 (3)
VH-PPI	BFLF2	-	EFEMP2	219100-604633	756.83	Cutis laxa, autosomal recessive, type I, 219100 (3)
VH-PPI	BFLF2	-	FBLN5	219100-604580	756.83	Cutis laxa, autosomal recessive, 219100 (3)
VH-PPI	BFLF2	-	EFEMP1	126600-601548	362.7	Doyne honeycomb degeneration of retina, 126600 (3)
VH-PPI	BFLF2	-	ACTN1	-	-	-
VH-PPI	BFLF2	-	EGFL7	-	-	-
VH-PPI	BFLF2	-	BAT3	-	-	-
VH-PPI	BFLF2	-	DKK3	-	-	-
VH-PPI	BFLF2	-	UBE2I	-	-	-
VH-PPI	BFLF2	-	LAMB2	176780-150290	-	Pelvic organ prolapse, susceptibility to, 176780 (3)
VH-PPI	BFLF2	-	TRAF3IP3	-	-	-
VH-PPI	BFLF2	-	LTBP4	-	-	-
VH-PPI	BFLF2	-	HOMER3	-	-	-
VH-PPI	BFLF2	-	PLSCR1	-	-	-
VH-PPI	BFLF2	-	FBLN5	123700-604580	756.83	Cutis laxa, autosomal dominant, 123700 (3)
VH-PPI	BFLF2	-	RBPMS	-	-	-
VH-PPI	BFLF2	-	TSNARE1	-	-	-
VH-PPI	BFLF2	-	FBLN2	-	-	-
VH-PPI	BFRF1	-	GRN	-	-	-
VH-PPI	BFRF1	-	GRN	607485-138945	-	Frontotemporal lobar degeneration with ubiquitin-positive inclusions, 607485 (3)
VH-PPI	BFRF1	-	PRMT1	-	-	-
VH-PPI	BFRF1	-	VWF	L2673-193400	286.4	von Willebrand disease (3)
VH-PPI	BFRF1	-	SLIT3	-	-	-
VH-PPI	BGLF2	-	HOMER3	-	-	-
VH-PPI	BGLF2	-	OPTN	137760-602432	365.9	Glaucoma 1E, primary open angle, adult-onset, 137760 (3)
VH-PPI	BGLF2	-	TUBA1A	-	-	-
VH-PPI	BGLF2	-	SHROOM3	-	-	-
VH-PPI	BGLF2	-	RBCK1	-	-	-
VH-PPI	BGLF2	-	OPTN	606657-602432	365.9	Glaucoma, normal tension, susceptibility to, 606657 (3)
VH-PPI	BGLF2	-	TUBA1A	611603-602529	-	Lissencephaly 3, 611603 (3)
VH-PPI	BGLF4	-	IQGAP2	-	-	-
VH-PPI	BGRF1/BDRF1	-	TSC22D4	-	-	-
VH-PPI	BGRF1/BDRF1	-	GPRASP2	-	-	-
VH-PPI	BGRF1/BDRF1	-	GPRASP1	-	-	-
VH-PPI	BGRF1/BDRF1	-	ENOX2	-	-	-
VH-PPI	BHRF1	-	FN1	601894-135600	-	Glomerulopathy with fibronectin deposits 2, 601894 (3)
VH-PPI	BHRF1	-	TRAF1	-	-	-
VH-PPI	BHRF1	-	TNXB	130020-600985	756.83	Ehlers-Danlos syndrome, hypermobility type, 130020 (3)
VH-PPI	BHRF1	-	VWF	L2673-193400	286.4	von Willebrand disease (3)
VH-PPI	BHRF1	-	GRN	-	-	-
VH-PPI	BHRF1	-	GRN	607485-138945	-	Frontotemporal lobar degeneration with ubiquitin-positive inclusions, 607485 (3)
VH-PPI	BHRF1	-	TNXB	606408-600985	756.83	Ehlers-Danlos due to tenascin X deficiency, 606408 (3)
VH-PPI	BHRF1	-	FN1	L3213-604061	208.9	Leukemia, acute myeloid, therapy-related (1)
VH-PPI	BHRF1	-	FN1	L3417-604061	183	Ovarian carcinoma (1)
VH-PPI	BHRF1	-	FN1	208250-604283	569.89	Camptodactyly-arthropathy-coxa vara-pericarditis syndrome, 208250 (3)
VH-PPI	BHRF1	-	ACTN1	-	-	-
VH-PPI	BHRF1	-	FN1	162100-604061	-	Amyotrophy, hereditary neuralgic, 162100 (3)
VH-PPI	BHRF1	-	LTBP4	-	-	-
VH-PPI	BILF1	-	VWF	L2673-193400	286.4	von Willebrand disease (3)
VH-PPI	BILF1	-	SLIT2	-	-	-
VH-PPI	BILF1	-	LMNB1	608709-150341	-	Lipodystrophy, partial, acquired, 608709 (3)
VH-PPI	BILF1	-	LMNB1	169500-150340	-	Leukodystrophy, adult-onset, autosomal dominant, 169500 (3)
VH-PPI	BILF1	-	GRN	607485-138945	-	Frontotemporal lobar degeneration with ubiquitin-positive inclusions, 607485 (3)
VH-PPI	BILF1	-	LMNB1	-	-	-
VH-PPI	BILF1	-	GRN	-	-	-
VH-PPI	BILF1	-	HOMER3	-	-	-
VH-PPI	BLLF1	-	HOMER3	-	-	-
VH-PPI	BLLF2	-	GRN	607485-138945	-	Frontotemporal lobar degeneration with ubiquitin-positive inclusions, 607485 (3)
VH-PPI	BLLF2	-	GRN	-	-	-
VH-PPI	BNLF2B	-	GRN	607485-138945	-	Frontotemporal lobar degeneration with ubiquitin-positive inclusions, 607485 (3)
VH-PPI	BNLF2B	-	GRN	-	-	-
VH-PPI	BOLF1	-	SERTAD1	-	-	-
VH-PPI	BOLF1	-	PSMA3	-	-	-
VH-PPI	BPLF1	-	HBB	L1175-141900	282.7	Heinz body anemias, beta- (3)
VH-PPI	BPLF1	-	HBB	L3549-141900	282.49	Thalassemias, beta- (3)
VH-PPI	BPLF1	-	HBB	L3068-141900	207	Erythremias, beta- (3)
VH-PPI	BPLF1	-	HLA-A	608579-142800	695.1	Stevens-Johnson syndrome, susceptibility to, 608579 (3)
VH-PPI	BPLF1	-	HBB	L985-141900	207	Erythremias, beta- (3)
VH-PPI	BPLF1	-	HLA-B	608579-142830	695.1	Stevens-Johnson syndrome, carbamazepine-induced, susceptibility to, 608579 (3)
VH-PPI	BPLF1	-	HBB	L3124-141900	282.7	HPFH, deletion type (3)
VH-PPI	BPLF1	-	IGLL1	601495-146770	279	Agammaglobulinemia, autosomal recessive, 601495 (3)
VH-PPI	BPLF1	-	HBB	L2437-141900	282.6	Sickle cell anemia (3)
VH-PPI	BPLF1	-	HLA-B	L3665-142830	995.27	Abacavir hypersensitivity, susceptibility to (3)
VH-PPI	BPLF1	-	GRN	607485-138945	-	Frontotemporal lobar degeneration with ubiquitin-positive inclusions, 607485 (3)
VH-PPI	BPLF1	-	IGLL1	L69-146770	279	Agammaglobulinemia, autosomal recessive (3)
VH-PPI	BPLF1	-	HBB	L1734-141900	289.7	Methemoglobinemias, beta- (3)
VH-PPI	BPLF1	-	HBB	L3127-141900	282.7	Heinz body anemias, beta- (3)
VH-PPI	BPLF1	-	HBB	603902-141900	282.49	Thalassemia-beta, dominant inclusion-body, 603902 (3)
VH-PPI	BPLF1	-	HBB	L2568-141900	282.49	Thalassemias, beta- (3)
VH-PPI	BPLF1	-	LASS4	-	-	-
VH-PPI	BPLF1	-	HLA-B	L14-142830	995.27	Abacavir hypersensitivity, susceptibility to (3)
VH-PPI	BPLF1	-	GAPDH	-	-	-
VH-PPI	BPLF1	-	HLA-A	L3664-142800	995.27	Abacavir hypersensitivity, susceptibility to (3)
VH-PPI	BPLF1	-	HLA-A	106300-142800	720	Ankylosing spondylitis, susceptibility to, 1, 106300 (3)
VH-PPI	BPLF1	-	HBB	L3328-141900	289.7	Methemoglobinemias, beta- (3)
VH-PPI	BPLF1	-	CCHCR1	-	-	-
VH-PPI	BPLF1	-	GRN	-	-	-
VH-PPI	BPLF1	-	NUCB2	-	-	-
VH-PPI	BPLF1	-	RPL3	-	-	-
VH-PPI	BPLF1	-	CD74	-	-	-
VH-PPI	BPLF1	-	HBB	L1264-141900	282.7	HPFH, deletion type (3)
VH-PPI	BPLF1	-	CLK1	-	-	-
VH-PPI	BPLF1	-	CIR	-	-	-
VH-PPI	BPLF1	-	HLA-B	106300-142830	720	Ankylosing spoldylitis, susceptibility to, 106300 (3)
VH-PPI	BRRF1	-	SNX4	-	-	-
VH-PPI	BRRF1	-	FBLN5	219100-604580	756.83	Cutis laxa, autosomal recessive, 219100 (3)
VH-PPI	BRRF1	-	SH3GLB1	-	-	-
VH-PPI	BRRF1	-	EFEMP1	126600-601548	362.7	Doyne honeycomb degeneration of retina, 126600 (3)
VH-PPI	BRRF1	-	FBLN5	123700-604580	756.83	Cutis laxa, autosomal dominant, 123700 (3)
VH-PPI	BRRF1	-	PLSCR1	-	-	-
VH-PPI	BRRF1	-	SEPP1	-	-	-
VH-PPI	BRRF1	-	LZTS2	-	-	-
VH-PPI	BRRF1	-	NTN4	-	-	-
VH-PPI	BRRF1	-	PARP4	-	-	-
VH-PPI	BRRF1	-	FBLN5	608895-604580	362.5	Macular degeneration, age-related, 3, 608895 (3)
VH-PPI	BRRF1	-	TRAF2	-	-	-
VH-PPI	BRRF1	-	PHYHD1	-	-	-
VH-PPI	BSLF1	-	NFKB1	-	-	-
VH-PPI	BTRF1	-	PPP1CA	-	-	-
VH-PPI	BVRF1	-	MMRN2	-	-	-
VH-PPI	BVRF1	-	PSMA3	-	-	-
VH-PPI	BVRF1	-	IMMT	-	-	-
VH-PPI	BVRF1	-	PSME3	-	-	-
VH-PPI	BVRF1	-	ACTN1	-	-	-
VH-PPI	BVRF1	-	EFEMP1	126600-601548	362.7	Doyne honeycomb degeneration of retina, 126600 (3)
VH-PPI	BVRF1	-	TSG101	L345-601387	239.3	Breast cancer (3)
VH-PPI	BVRF1	-	TSG101	L2823-601387	239.3	Breast cancer (3)
VH-PPI	BVRF1	-	PKM2	-	-	-
VH-PPI	BVRF1	-	EFEMP2	219100-604633	756.83	Cutis laxa, autosomal recessive, type I, 219100 (3)
VH-PPI	BVRF1	-	NCKIPSD	-	-	-
VH-PPI	BVRF1	-	RNF31	-	-	-
VH-PPI	BXRF1	-	FBLN5	123700-604580	756.83	Cutis laxa, autosomal dominant, 123700 (3)
VH-PPI	BXRF1	-	FBLN5	608895-604580	362.5	Macular degeneration, age-related, 3, 608895 (3)
VH-PPI	BXRF1	-	FBLN5	219100-604580	756.83	Cutis laxa, autosomal recessive, 219100 (3)
VH-PPI	BZLF2	-	GRN	607485-138945	-	Frontotemporal lobar degeneration with ubiquitin-positive inclusions, 607485 (3)
VH-PPI	BZLF2	-	GRN	-	-	-
VH-PPI	EB1/BZLF1	-	ENOX2	-	-	-
VH-PPI	EB1/BZLF1	-	GPRASP1	-	-	-
VH-PPI	EBNA1	-	TSG101	L2823-601387	239.3	Breast cancer (3)
VH-PPI	EBNA1	-	TSG101	L345-601387	239.3	Breast cancer (3)
VH-PPI	EBNA1	-	MDFI	-	-	-
VH-PPI	EBNA1	-	PICK1	-	-	-
VH-PPI	EBNA2	-	FCHSD1	-	-	-
VH-PPI	EBNA2	-	EFEMP2	219100-604633	756.83	Cutis laxa, autosomal recessive, type I, 219100 (3)
VH-PPI	EBNA2	-	FBLN5	123700-604580	756.83	Cutis laxa, autosomal dominant, 123700 (3)
VH-PPI	EBNA2	-	BLNK	L1353-604515	279	Hypoglobulinemia and absent B cells (3)
VH-PPI	EBNA2	-	GCA	-	-	-
VH-PPI	EBNA2	-	SRI	-	-	-
VH-PPI	EBNA2	-	RBP1	-	-	-
VH-PPI	EBNA2	-	CD46	235400-120920	283.11	Hemolytic-uremic syndrome, 235400 (3)
VH-PPI	EBNA2	-	FBLN5	608895-604580	362.5	Macular degeneration, age-related, 3, 608895 (3)
VH-PPI	EBNA2	-	CD46	L5435-120920	-	Measles, susceptibility to (1)
VH-PPI	EBNA2	-	SH3GLB1	-	-	-
VH-PPI	EBNA2	-	CBX3	-	-	-
VH-PPI	EBNA2	-	AES	-	-	-
VH-PPI	EBNA2	-	RCBTB1	-	-	-
VH-PPI	EBNA2	-	FBLN5	219100-604580	756.83	Cutis laxa, autosomal recessive, 219100 (3)
VH-PPI	EBNA2	-	DYNLL1	-	-	-
VH-PPI	EBNA2	-	KRT36	-	-	-
VH-PPI	EBNA2	-	PSMA3	-	-	-
VH-PPI	EBNA2	-	CD5L	-	-	-
VH-PPI	EBNA3	-	RPL4	-	-	-
VH-PPI	EBNA3	-	NR4A1	-	-	-
VH-PPI	EBNA4	-	ZYX	-	-	-
VH-PPI	EBNA4	-	SH3GLB1	-	-	-
VH-PPI	EBNA4	-	ACTN1	-	-	-
VH-PPI	EBNA4	-	ACTN4	603278-604638	587	Glomerulosclerosis, focal segmental, 1, 603278 (3)
VH-PPI	EBNA6	-	FBLN5	608895-604580	362.5	Macular degeneration, age-related, 3, 608895 (3)
VH-PPI	EBNA6	-	FBLN5	123700-604580	756.83	Cutis laxa, autosomal dominant, 123700 (3)
VH-PPI	EBNA6	-	SEPP1	-	-	-
VH-PPI	EBNA6	-	VWF	L2673-193400	286.4	von Willebrand disease (3)
VH-PPI	EBNA6	-	PSMA3	-	-	-
VH-PPI	EBNA6	-	FBLN5	219100-604580	756.83	Cutis laxa, autosomal recessive, 219100 (3)
VH-PPI	EBNALP	-	PSMA3	-	-	-
VH-PPI	GB	-	UBXN11	-	-	-
VH-PPI	GB	-	FN1	601894-135600	-	Glomerulopathy with fibronectin deposits 2, 601894 (3)
VH-PPI	GB	-	GRN	607485-138945	-	Frontotemporal lobar degeneration with ubiquitin-positive inclusions, 607485 (3)
VH-PPI	GB	-	VIM	-	-	-
VH-PPI	GB	-	AP2B1	-	-	-
VH-PPI	GB	-	GPRASP1	-	-	-
VH-PPI	GB	-	LTBP4	-	-	-
VH-PPI	GB	-	FN1	L3417-604061	183	Ovarian carcinoma (1)
VH-PPI	GB	-	PDE6G	-	-	-
VH-PPI	GB	-	FAM168B	-	-	-
VH-PPI	GB	-	LAMB1	L2952-150240	756.83	Cutis laxa, marfanoid neonatal type (1) ()
VH-PPI	GB	-	TRAF2	-	-	-
VH-PPI	GB	-	FBLN5	123700-604580	756.83	Cutis laxa, autosomal dominant, 123700 (3)
VH-PPI	GB	-	FN1	L3213-604061	208.9	Leukemia, acute myeloid, therapy-related (1)
VH-PPI	GB	-	FN1	162100-604061	-	Amyotrophy, hereditary neuralgic, 162100 (3)
VH-PPI	GB	-	VWF	L2673-193400	286.4	von Willebrand disease (3)
VH-PPI	GB	-	FN1	208250-604283	569.89	Camptodactyly-arthropathy-coxa vara-pericarditis syndrome, 208250 (3)
VH-PPI	GB	-	FBLN5	219100-604580	756.83	Cutis laxa, autosomal recessive, 219100 (3)
VH-PPI	GB	-	FBLN5	608895-604580	362.5	Macular degeneration, age-related, 3, 608895 (3)
VH-PPI	GB	-	GRN	-	-	-
VH-PPI	GL	-	HOMER3	-	-	-
VH-PPI	GM	-	HOMER3	-	-	-
VH-PPI	GM	-	NUCB1	-	-	-
VH-PPI	GN	-	HOMER3	-	-	-
VH-PPI	LMP1	-	EGFL7	-	-	-
VH-PPI	LMP2	-	LGALS3BP	-	-	-
VH-PPI	LMP2A	-	LGALS3BP	-	-	-
VH-PPI	SM	-	MAPRE1	-	-	-
VH-PPI	SM	-	TRA2B	-	-	-
VH-PPI	SM	-	SP100	-	-	-
VH-PPI	TK	-	GPRASP1	-	-	-
VH-PPI	TK	-	GPRASP2	-	-	-
VH-PPI	TK	-	TSC22D4	-	-	-
VH-PPI	TK	-	ENOX2	-	-	-
VH-PPI	BALF1	-	CEP76	-	-	-
VH-PPI	BALF1	-	FHL3	608898-608897	288.4	Hemophagocytic lymphohistiocytosis, familial, 3, 608898 (3)
VH-PPI	BALF2	-	ZYX	-	-	-
VH-PPI	BALF2	-	PNMA1	-	-	-
VH-PPI	BALF2	-	NEFL	607684-162280	356.1	Charcot-Marie-Tooth disease, type 2E, 607684 (3)
VH-PPI	BALF2	-	NEFL	607734-162280	356.1	Charcot-Marie-Tooth disease, type 1F, 607734 (3)
VH-PPI	BALF2	-	GOLGA2	-	-	-
VH-PPI	BBRF2	-	MIPOL1	135750-606850	-	Mirror-image polydactyly, 135750 (1)
VH-PPI	BBRF2	-	C1orf50	-	-	-
VH-PPI	BBRF2	-	GSTA4	-	-	-
VH-PPI	BBRF2	-	GOLGA2	-	-	-
VH-PPI	BBRF2	-	PNMA1	-	-	-
VH-PPI	BBRF2	-	DZIP3	-	-	-
VH-PPI	BBRF2	-	MCM6	223100-601806	-	Lactase persistance/nonpersistance, 223100 (3)
VH-PPI	BBRF2	-	COPB1	-	-	-
VH-PPI	BBRF2	-	PTBP1	-	-	-
VH-PPI	BBRF2	-	NEFL	607734-162280	356.1	Charcot-Marie-Tooth disease, type 1F, 607734 (3)
VH-PPI	BBRF2	-	C6orf182	-	-	-
VH-PPI	BBRF2	-	CEP76	-	-	-
VH-PPI	BBRF2	-	RINT1	-	-	-
VH-PPI	BBRF2	-	TFCP2	-	-	-
VH-PPI	BBRF2	-	MIPOL1	-	-	-
VH-PPI	BBRF2	-	NEFL	607684-162280	356.1	Charcot-Marie-Tooth disease, type 2E, 607684 (3)
VH-PPI	BBRF2	-	OPTN	137760-602432	365.9	Glaucoma 1E, primary open angle, adult-onset, 137760 (3)
VH-PPI	BBRF2	-	OPTN	606657-602432	365.9	Glaucoma, normal tension, susceptibility to, 606657 (3)
VH-PPI	BBRF2	-	MCM6	-	-	-
VH-PPI	BBRF2	-	MCM6	606255-601806	-	Tall stature, susceptibility to, 606255 (3)
VH-PPI	BDLF2	-	CEP76	-	-	-
VH-PPI	BDLF3	-	OGT	-	-	-
VH-PPI	BDLF3	-	AGR2	-	-	-
VH-PPI	BFLF2	-	TRIM27	-	-	-
VH-PPI	BFLF2	-	KIFC3	-	-	-
VH-PPI	BFLF2	-	MDFI	-	-	-
VH-PPI	BFLF2	-	GOLGA2	-	-	-
VH-PPI	BFLF2	-	TFIP11	-	-	-
VH-PPI	BFLF2	-	PDE4DIP	-	-	-
VH-PPI	BFLF2	-	PNMA1	-	-	-
VH-PPI	BFLF2	-	GPRASP2	-	-	-
VH-PPI	BFLF2	-	KIAA0774	-	-	-
VH-PPI	BFLF2	-	TRAF1	-	-	-
VH-PPI	BFLF2	-	LZTS2	-	-	-
VH-PPI	BFRF1	-	ZBED1	-	-	-
VH-PPI	BFRF1	-	CRTAC1	-	-	-
VH-PPI	BHRF1	-	FATE1	-	-	-
VH-PPI	BHRF1	-	NAALADL2	-	-	-
VH-PPI	BHRF1	-	ERLIN1	-	-	-
VH-PPI	BHRF1	-	MARCO	-	-	-
VH-PPI	BHRF1	-	EXOC5	-	-	-
VH-PPI	BHRF1	-	BIK	-	-	-
VH-PPI	BLRF2	-	DVL2	-	-	-
VH-PPI	BNLF2A	-	UBE2I	-	-	-
VH-PPI	BNLF2A	-	CREB3	-	-	-
VH-PPI	BNLF2A	-	RAB3IP	-	-	-
VH-PPI	BNLF2B	-	SPAG5	-	-	-
VH-PPI	BNLF2B	-	CCNDBP1	-	-	-
VH-PPI	BPLF1	-	AP2B1	-	-	-
VH-PPI	BSLF2;BMLF1	-	RBMY1F	-	-	-
VH-PPI	BSLF2;BMLF1	-	UBE2I	-	-	-
VH-PPI	BSLF2;BMLF1	-	COIL	-	-	-
VH-PPI	BSLF2;BMLF1	-	RBPMS	-	-	-
VH-PPI	BSLF2;BMLF1	-	RBMX	-	-	-
VH-PPI	BSLF2;BMLF1	-	BEND7	-	-	-
VH-PPI	BSLF2;BMLF1	-	KHDRBS2	-	-	-
VH-PPI	BSLF2;BMLF1	-	PSME3	-	-	-
VH-PPI	BSLF2;BMLF1	-	TFCP2	-	-	-
VH-PPI	BZLF2	-	CREB3	-	-	-
VH-PPI	DUT	-	TAX1BP1	-	-	-
VH-PPI	DUT	-	UBE2I	-	-	-
VH-PPI	EB1/BZLF1	-	HSFY1	-	-	-
VH-PPI	EB1/BZLF1	-	PEX5	202370-600414	277.86	Adrenoleukodystrophy, neonatal, 202370 (3)
VH-PPI	EB1/BZLF1	-	C1orf94	-	-	-
VH-PPI	EB1/BZLF1	-	RBPMS	-	-	-
VH-PPI	EB1/BZLF1	-	TFG	-	-	-
VH-PPI	EB1/BZLF1	-	TFG	612237-602498	-	Chondrosarcoma, extraskeletal myxoid, 612237 (1)
VH-PPI	EB1/BZLF1	-	PEX5	214100-600414	277.86	Zellweger syndrome, 214100 (3)
VH-PPI	EB1/BZLF1	-	POGZ	-	-	-
VH-PPI	EBNA1	-	SRPK2	-	-	-
VH-PPI	EBNA1	-	KPNA6	-	-	-
VH-PPI	EBNA1	-	LNX1	-	-	-
VH-PPI	EBNA1	-	KPNA3	-	-	-
VH-PPI	EBNA3	-	RFX6	-	-	-
VH-PPI	EBNA4	-	GMCL1	-	-	-
VH-PPI	EBNA4	-	GOLGA2	-	-	-
VH-PPI	EBNA4	-	PSME3	-	-	-
VH-PPI	EBNA4	-	ESRRG	-	-	-
VH-PPI	EBNA4	-	TRAF4	-	-	-
VH-PPI	EBNA4	-	RIMBP3	-	-	-
VH-PPI	EBNA4	-	RBPMS	-	-	-
VH-PPI	EBNA4	-	TFCP2	-	-	-
VH-PPI	EBNA4	-	BANP	-	-	-
VH-PPI	EBNA6	-	MAGED1	-	-	-
VH-PPI	EBNA6	-	RBPMS	-	-	-
VH-PPI	EBNALP	-	MAGEA1	-	-	-
VH-PPI	EBNALP	-	SCYL1	-	-	-
VH-PPI	EBNALP	-	ESRRG	-	-	-
VH-PPI	EBNALP	-	SP100	-	-	-
VH-PPI	EBNALP	-	CCDC67	-	-	-
VH-PPI	GB	-	ESRRG	-	-	-
VH-PPI	GB	-	MID2	-	-	-
VH-PPI	GB	-	DVL2	-	-	-
VH-PPI	GB	-	GOLGA2	-	-	-
VH-PPI	GB	-	TFIP11	-	-	-
VH-PPI	GB	-	PNMA1	-	-	-
VH-PPI	GB	-	RIMBP3	-	-	-
VH-PPI	GB	-	CCNDBP1	-	-	-
VH-PPI	GB	-	MKRN3	-	-	-
VH-PPI	GB	-	TRIM27	-	-	-
VH-PPI	GM	-	CCDC33	-	-	-
VH-PPI	GN	-	CREB3	-	-	-
VH-PPI	GN	-	TMEM159	-	-	-
VH-PPI	LF2	-	LNX1	-	-	-
VH-PPI	LF2	-	NDC80	-	-	-
VH-PPI	LF2	-	JAKMIP2	-	-	-
VH-PPI	LMP1	-	UBQLN1	-	-	-
VH-PPI	LMP2A	-	LNX1	-	-	-
VH-PPI	TK	-	TFCP2	-	-	-
VH-PPI	UNG	-	GSTA4	-	-	-
VH-PPI	BDLF1	-	CCDC14	-	-	-
VH-PPI	BDLF2	-	PSMA3	-	-	-
VH-PPI	BFRF1	-	HOMER3	-	-	-
VH-PPI	EBNA4	-	PSMA3	-	-	-
VH-PPI	GB	-	LZTS2	-	-	-
VH-PPI	EBNA3	-	RBPJ	-	-	-
VH-PPI	EBNA4	-	RBPJ	-	-	-
VH-PPI	EBNA1	-	TNPO1	-	-	-
VH-PPI	EBNA1	-	RPA1	-	-	-
VH-PPI	EBNA2	-	GTF2E1	-	-	-
VH-PPI	EBNA2	-	TBP	607136-600075	334.3	Spinocerebellar ataxia 17, 607136 (3)
VH-PPI	EBNA2	-	SMARCB1	L3484-601607	191.9	Rhabdoid predisposition syndrome, familial (3)
VH-PPI	EBNA2	-	EP300	180849-602700	759.89	Rubinstein-Taybi syndrome, 180849 (3)
VH-PPI	EBNA2	-	TBP	168600-600075	332	Parkinson disease, 168600 (3)
VH-PPI	EBNA2	-	SMARCB1	L2336-601607	191.9	Rhabdoid tumors (3)
VH-PPI	EBNA2	-	MYB	L5503-189990	-	T-cell acute lymphoblastic leukemia (3)
VH-PPI	EBNA2	-	SND1	-	-	-
VH-PPI	EBNA2	-	GTF2E2	-	-	-
VH-PPI	EBNA2	-	DDX20	-	-	-
VH-PPI	EBNA2	-	GTF2H4	-	-	-
VH-PPI	EBNA2	-	EP300	114500-602700	153	Colorectal cancer, 114500 (3)
VH-PPI	EBNA2	-	SPIB	-	-	-
VH-PPI	EBNA2	-	MYB	-	-	-
VH-PPI	EBNA2	-	TBP	607136-600075	333.4	Spinocerebellar ataxia 17, 607136 (3)
VH-PPI	EBNA2	-	SPI1	-	-	-
VH-PPI	EBNA2	-	GTF2B	-	-	-
VH-PPI	EBNA2	-	SMARCB1	L2335-601607	191.9	Rhabdoid predisposition syndrome, familial (3)
VH-PPI	EBNA3	-	UPRT	-	-	-
VH-PPI	EBNA3	-	AIP	219090-605555	-	Pituitary adenoma, ACTH-secreting, 219090 (3)
VH-PPI	EBNA3	-	CCT5	-	-	-
VH-PPI	EBNA3	-	AIP	-	-	-
VH-PPI	EBNA3	-	AIP	600634-605555	-	Pituitary adenoma, prolactin-secreting, 600634 (3)
VH-PPI	EBNA3	-	CCT5	256840-610150	-	Neuropathy, hereditary sensory, with spastic paraplegia, 256840 (3)
VH-PPI	EBNA3	-	AIP	102200-605555	-	Pituitary adenoma, growth hormone-secreting, 102200 (3)
VH-PPI	EBNA3	-	AHR	-	-	-
VH-PPI	EBNA3	-	CTBP1	-	-	-
VH-PPI	EBNA6	-	PTMA	-	-	-
VH-PPI	EBNA6	-	SMN1	253300-600354	335.1	Spinal muscular atrophy-1, 253300 (3)
VH-PPI	EBNA6	-	SMN1	253400-600354	335.1	Spinal muscular atrophy-3, 253400 (3)
VH-PPI	EBNA6	-	NME1	256700-156490	194	Neuroblastoma, 256700 (3)
VH-PPI	EBNA6	-	RBPJ	-	-	-
VH-PPI	EBNA6	-	SMN1	271150-600354	335.1	Spinal muscular atrophy-4, 271150 (3)
VH-PPI	EBNA6	-	DDX20	-	-	-
VH-PPI	EBNA6	-	SMN1	253550-600354	335.1	Spinal muscular atrophy-2, 253550 (3)
VH-PPI	EBNALP	-	CDKN2A	L2017-600160	161.9	Orolaryngeal cancer, multiple, (3)
VH-PPI	EBNALP	-	CDKN2A	L4649-155600	-	Malignant melanoma, cutaneous (2)
VH-PPI	EBNALP	-	CDKN2A	610798-610389	-	Immunodeficiency due to defect in MAPBP-interacting protein, 610798 (3)
VH-PPI	EBNALP	-	CDKN2A	606719-600160	157.8	Pancreatic cancer/melanoma syndrome, 606719 (3)
VH-PPI	EBNALP	-	CDKN2A	151623-600160	V84.01	Li Fraumeni syndrome, 151623 (3)
VH-PPI	EBNALP	-	CDKN2A	155755-600160	172.9	Melanoma and neural system tumor syndrome, 155755 (3)
VH-PPI	EBNALP	-	P4HA1	-	-	-
VH-PPI	EBNALP	-	CDKN2A	L3403-600160	161.9	Orolaryngeal cancer, multiple, (3)
VH-PPI	EBNALP	-	CDKN2A	155601-600160	172.9	Melanoma, cutaneous malignant, 2, 155601 (3)
VH-PPI	LMP1	-	TRAF1	-	-	-
VH-PPI	LMP1	-	TRAF2	-	-	-
VH-PPI	LMP1	-	TRAF3	-	-	-
VH-PPI	LMP2A	-	SRC	L581-190090	153	Colon cancer, advanced (3)
VH-PPI	LMP2A	-	ITCH	-	-	-
VH-PPI	LMP2A	-	LCK	L3487-153390	279.2	SCID due to LCK deficiency (1)
VH-PPI	LMP2A	-	LYN	-	-	-
VH-PPI	LMP2A	-	SYK	-	-	-
VH-PPI	LMP2A	-	NEDD4	-	-	-
VH-PPI	LMP2A	-	SRC	L2916-190090	153	Colon cancer, advanced (3)
VH-PPI	LMP2A	-	ZAP70	L3501-176947	757.1	Selective T-cell defect (3)
VH-PPI	EB1/BZLF1	-	UBN1	-	-	-
VH-PPI	EBNA2	-	NR4A1	-	-	-
VH-PPI	EB1/BZLF1	-	TP53	L3557-191170	193	Thyroid carcinoma (3)
VH-PPI	EB1/BZLF1	-	TP53	202300-191170	194	Adrenal cortical carcinoma, 202300 (3)
VH-PPI	EB1/BZLF1	-	TP53	L1243-191170	216.9	Histiocytoma (3)
VH-PPI	EB1/BZLF1	-	TP53	151623-191170	V84.01	Li-Fraumeni syndrome, 151623 (3)
VH-PPI	EB1/BZLF1	-	TP53	L2048-191170	170.9	Osteosarcoma (3)
VH-PPI	EB1/BZLF1	-	TP53	114550-191170	211.5	Hepatocellular carcinoma, 114550 (3)
VH-PPI	EB1/BZLF1	-	TP53	114500-191170	153	Colorectal cancer, 114500 (3)
VH-PPI	EB1/BZLF1	-	TP53	114480-191170	239.3	Breast cancer, 114480 (3)
VH-PPI	EB1/BZLF1	-	TP53	L1792-191170	259.2	Multiple malignancy syndrome (3)
VH-PPI	EB1/BZLF1	-	TP53	L3409-191170	170.9	Osteosarcoma (3)
VH-PPI	EB1/BZLF1	-	TP53	260350-191170	157.8	Pancreatic cancer, 260350 (3)
VH-PPI	EB1/BZLF1	-	TP53	161550-191170	147.9	Nasopharyngeal carcinoma, 161550 (3)
VH-PPI	EB1/BZLF1	-	TP53	L2588-191170	193	Thyroid carcinoma (3)
VH-PPI	EBNA2	-	RBPJ	-	-	-
VH-PPI	EB1/BZLF1	-	RARA	-	-	-
VH-PPI	EB1/BZLF1	-	RXRA	-	-	-
VH-PPI	EB1/BZLF1	-	RARA	612376-180240	-	Leukemia, acute promyelocytic, 612376 (1)
VH-PPI	EB1/BZLF1	-	NFKB1	-	-	-
VH-PPI	EBNALP	-	TP53	151623-191170	V84.01	Li-Fraumeni syndrome, 151623 (3)
VH-PPI	EBNALP	-	RB1	L2329-180200	190.5	Retinoblastoma (3)
VH-PPI	EBNALP	-	TP53	114480-191170	239.3	Breast cancer, 114480 (3)
VH-PPI	EBNALP	-	TP53	161550-191170	147.9	Nasopharyngeal carcinoma, 161550 (3)
VH-PPI	EBNALP	-	TP53	260350-191170	157.8	Pancreatic cancer, 260350 (3)
VH-PPI	EBNALP	-	TP53	L1792-191170	259.2	Multiple malignancy syndrome (3)
VH-PPI	EBNALP	-	TP53	L2048-191170	170.9	Osteosarcoma (3)
VH-PPI	EBNALP	-	TP53	L3557-191170	193	Thyroid carcinoma (3)
VH-PPI	EBNALP	-	RB1	259500-180200	170.9	Osteosarcoma, 259500 (2)
VH-PPI	EBNALP	-	RB1	L4910-180200	-	Pinealoma with bilateral retinoblastoma (2)
VH-PPI	EBNALP	-	RB1	109800-180200	188.9	Bladder cancer, 109800 (3)
VH-PPI	EBNALP	-	TP53	L1243-191170	216.9	Histiocytoma (3)
VH-PPI	EBNALP	-	TP53	L2588-191170	193	Thyroid carcinoma (3)
VH-PPI	EBNALP	-	TP53	L3409-191170	170.9	Osteosarcoma (3)
VH-PPI	EBNALP	-	TP53	114550-191170	211.5	Hepatocellular carcinoma, 114550 (3)
VH-PPI	EBNALP	-	TP53	114500-191170	153	Colorectal cancer, 114500 (3)
VH-PPI	EBNALP	-	TP53	202300-191170	194	Adrenal cortical carcinoma, 202300 (3)
VH-PPI	EBNA1	-	KPNA1	-	-	-
VH-PPI	EBNA1	-	NAP1L1	137760-602432	365.9	Glaucoma 1E, primary open angle, adult-onset, 137760 (3)
VH-PPI	EBNA1	-	ORC2L	-	-	-
VH-PPI	EBNA1	-	TERF2	-	-	-
VH-PPI	EBNA1	-	SFRS1	-	-	-
VH-PPI	EBNA1	-	EBNA1BP2	-	-	-
VH-PPI	EBNA1	-	CSNK2A2	-	-	-
VH-PPI	EBNA1	-	NAP1L1	606657-602432	365.9	Glaucoma, normal tension, susceptibility to, 606657 (3)
VH-PPI	EBNA1	-	CSNK2A1	-	-	-
VH-PPI	EBNA6	-	CTBP1	-	-	-
VH-PPI	EBNALP	-	GBAS	-	-	-
VH-PPI	EBNALP	-	UBC	-	-	-
VH-PPI	EBNALP	-	RPS8	-	-	-
VH-PPI	EBNALP	-	XRCC5	-	-	-
VH-PPI	EBNALP	-	RUVBL2	-	-	-
VH-PPI	EBNALP	-	BAG2	-	-	-
VH-PPI	EBNALP	-	HSPB1	606595-602195	356.1	Charcot-Marie-Tooth disease, axonal, type 2F, 606595 (3)
VH-PPI	EBNALP	-	KHDRBS1	-	-	-
VH-PPI	EBNALP	-	HNRNPM	-	-	-
VH-PPI	EBNALP	-	GRPEL1	-	-	-
VH-PPI	EBNALP	-	HNRNPA2B1	-	-	-
VH-PPI	EBNALP	-	SFPQ	-	-	-
VH-PPI	EBNALP	-	RPL31	-	-	-
VH-PPI	EBNALP	-	CSE1L	-	-	-
VH-PPI	EBNALP	-	GLUD1	604931-138090	255.2	Cortisone reductase deficiency, 604931 (3)
VH-PPI	EBNALP	-	RPS17	-	-	-
VH-PPI	EBNALP	-	SF3B2	-	-	-
VH-PPI	EBNALP	-	PTBP1	-	-	-
VH-PPI	EBNALP	-	HNRNPD	-	-	-
VH-PPI	EBNALP	-	SEC16A	-	-	-
VH-PPI	EBNALP	-	GLUD1	606762-138130	251.2	Hyperinsulinism-hyperammonemia syndrome, 606762 (3)
VH-PPI	EBNALP	-	SF3B1	-	-	-
VH-PPI	EBNALP	-	RCN1	-	-	-
VH-PPI	EBNALP	-	DDX17	-	-	-
VH-PPI	EBNALP	-	RPL12	-	-	-
VH-PPI	EBNALP	-	CLTC	-	-	-
VH-PPI	EBNALP	-	DHX9	-	-	-
VH-PPI	EBNALP	-	P4HA2	-	-	-
VH-PPI	EBNALP	-	NCL	-	-	-
VH-PPI	EBNALP	-	PCCB	606054-232050	276.2	Propionicacidemia, 606054 (3)
VH-PPI	EBNALP	-	HNRNPA0	-	-	-
VH-PPI	EBNALP	-	RPL23	-	-	-
VH-PPI	EBNALP	-	GCN1L1	-	-	-
VH-PPI	EBNALP	-	SERBP1	-	-	-
VH-PPI	EBNALP	-	SYNCRIP	-	-	-
VH-PPI	EBNALP	-	RPS16	-	-	-
VH-PPI	EBNALP	-	RPS18	-	-	-
VH-PPI	EBNALP	-	SNRPA	-	-	-
VH-PPI	EBNALP	-	DNAJB1	-	-	-
VH-PPI	EBNALP	-	HSPA1B	-	-	-
VH-PPI	EBNALP	-	PSMC2	-	-	-
VH-PPI	EBNALP	-	WDR77	-	-	-
VH-PPI	EBNALP	-	LRPPRC	220111-607544	330.8	Leigh syndrome, French-Canadian type, 220111 (3)
VH-PPI	EBNALP	-	MLF2	-	-	-
VH-PPI	EBNALP	-	RPS2	-	-	-
VH-PPI	EBNALP	-	RAD50	-	-	-
VH-PPI	EBNALP	-	HSPD1	605280-118190	94	Spastic paraplegia-13, 605280 (3)
VH-PPI	EBNALP	-	CDC2	-	-	-
VH-PPI	EBNALP	-	RFC3	-	-	-
VH-PPI	EBNALP	-	TIMM50	-	-	-
VH-PPI	EBNALP	-	H1FX	-	-	-
VH-PPI	EBNALP	-	XPOT	-	-	-
VH-PPI	EBNALP	-	EIF3B	-	-	-
VH-PPI	EBNALP	-	SNRNP200	-	-	-
VH-PPI	EBNALP	-	CAD	-	-	-
VH-PPI	EBNALP	-	RPS6	-	-	-
VH-PPI	EBNALP	-	HNRNPA1	-	-	-
VH-PPI	EBNALP	-	PCBP2	-	-	-
VH-PPI	EBNALP	-	HSPA5	-	-	-
VH-PPI	EBNALP	-	RPL8	-	-	-
VH-PPI	EBNALP	-	HNRNPU	-	-	-
VH-PPI	EBNALP	-	SSBP1	-	-	-
VH-PPI	EBNALP	-	RUVBL1	-	-	-
VH-PPI	EBNALP	-	DARS	-	-	-
VH-PPI	EBNALP	-	PCCA	606054-232000	276.2	Propionicacidemia, 606054 (3)
VH-PPI	EBNALP	-	RPL22	-	-	-
VH-PPI	EBNALP	-	PSMD2	-	-	-
VH-PPI	EBNALP	-	ILF3	-	-	-
VH-PPI	EBNALP	-	TUBA1B	-	-	-
VH-PPI	EBNALP	-	HSPD1	612233-118190	-	Leukodystrophy, hypomyelinating, autosomal recessive, 612233 (3)
VH-PPI	EBNALP	-	SFRS1	-	-	-
VH-PPI	EBNALP	-	IQGAP2	-	-	-
VH-PPI	EBNALP	-	MAGED1	-	-	-
VH-PPI	EBNALP	-	HNRNPAB	-	-	-
VH-PPI	EBNALP	-	SEC13	-	-	-
VH-PPI	EBNALP	-	HNRNPK	-	-	-
VH-PPI	EBNALP	-	CAPZA1	-	-	-
VH-PPI	EBNALP	-	IARS	-	-	-
VH-PPI	EBNALP	-	LDHB	L1467-150100	271.3	Lactate dehydrogenase-B deficiency (3)
VH-PPI	EBNALP	-	FLNC	-	-	-
VH-PPI	EBNALP	-	HIST1H2BI	-	-	-
VH-PPI	EBNALP	-	RPL13	-	-	-
VH-PPI	EBNALP	-	HSPB1	608634-602195	355.9	Neuropathy, distal hereditary motor, 608634 (3)
VH-PPI	EBNALP	-	NIPSNAP1	-	-	-
VH-PPI	EBNALP	-	QARS	-	-	-
VH-PPI	EBNALP	-	RCN2	-	-	-
VH-PPI	EBNALP	-	HNRNPR	-	-	-
VH-PPI	EBNALP	-	NUP93	-	-	-
VH-PPI	EBNALP	-	HNRNPCL1	-	-	-
VH-PPI	EBNALP	-	CLPX	-	-	-
VH-PPI	EBNALP	-	RPL10	-	-	-
VH-PPI	EBNALP	-	NONO	-	-	-
VH-PPI	EBNALP	-	UBR5	-	-	-
VH-PPI	EBNALP	-	RPL7	-	-	-
VH-PPI	EBNALP	-	DDX5	-	-	-
VH-PPI	EBNALP	-	RPS13	-	-	-
VH-PPI	EBNALP	-	RSL1D1	-	-	-
VH-PPI	EBNALP	-	SNRPB2	-	-	-
VH-PPI	EBNALP	-	HSPA8	-	-	-
VH-PPI	EBNALP	-	TNNT3	601680-600692	728.3	Arthyrgryposis multiplex congenita, distal, type 2B, 601680 (3)
VH-PPI	EBNALP	-	SLC25A6	-	-	-
VH-PPI	EBNALP	-	RPL17	-	-	-
VH-PPI	EBNALP	-	SET	-	-	-
VH-PPI	EBNALP	-	DNAJB6	-	-	-
VH-PPI	EBNALP	-	EPRS	-	-	-
VH-PPI	EBNALP	-	PSMB6	-	-	-
VH-PPI	EBNALP	-	PRPF8	600059-607300	362.74	Retinitis pigmentosa-13, 600059 (3)
VH-PPI	EBNALP	-	RPS23	-	-	-
VH-PPI	EBNALP	-	RPL7A	-	-	-
VH-PPI	EBNALP	-	TUBB	-	-	-
VH-PPI	EBNALP	-	SNRPD2	-	-	-
VH-PPI	EBNALP	-	RPL18	-	-	-
VH-PPI	EBNALP	-	RPS9	-	-	-
VH-PPI	EBNALP	-	DNAJB5	-	-	-
VH-PPI	EBNALP	-	HIST1H1D	-	-	-
VH-PPI	LMP1	-	RABAC1	-	-	-
VH-PPI	EBNA2	-	ZMYND11	-	-	-
VH-PPI	EBNA1	-	USP7	-	-	-
VH-PPI	EBNALP	-	HAX1	610738-605998	-	Neutropenia, severe congenital, autosomal recessive 3, 610738 (3)
VH-PPI	EBNALP	-	HAX1	-	-	-
VH-PPI	EBNALP	-	AKAP8L	-	-	-
VH-PPI	EBNALP	-	RPS3A	-	-	-
VH-PPI	LMP1	-	ZMYND11	-	-	-
VH-PPI	LMP1	-	TRADD	-	-	-
VH-PPI	EBNA1	-	KPNA2	-	-	-
VH-PPI	EBNA1	-	C1QBP	-	-	-
VH-PDI	EB1/BZLF1	-	TP53	260350-191170	157.8	Pancreatic cancer, 260350 (3)
VH-PDI	EB1/BZLF1	-	TP53	L2048-191170	170.9	Osteosarcoma (3)
VH-PDI	EB1/BZLF1	-	TP53	L3557-191170	193	Thyroid carcinoma (3)
VH-PDI	EB1/BZLF1	-	TP53	202300-191170	194	Adrenal cortical carcinoma, 202300 (3)
VH-PDI	EB1/BZLF1	-	TP53	L3409-191170	170.9	Osteosarcoma (3)
VH-PDI	EB1/BZLF1	-	TP53	114550-191170	211.5	Hepatocellular carcinoma, 114550 (3)
VH-PDI	EB1/BZLF1	-	TP53	151623-191170	V84.01	Li-Fraumeni syndrome, 151623 (3)
VH-PDI	EB1/BZLF1	-	TP53	114500-191170	153	Colorectal cancer, 114500 (3)
VH-PDI	EB1/BZLF1	-	TP53	L2588-191170	193	Thyroid carcinoma (3)
VH-PDI	EB1/BZLF1	-	TP53	L1792-191170	259.2	Multiple malignancy syndrome (3)
VH-PDI	EB1/BZLF1	-	TP53	161550-191170	147.9	Nasopharyngeal carcinoma, 161550 (3)
VH-PDI	EB1/BZLF1	-	TP53	114480-191170	239.3	Breast cancer, 114480 (3)
VH-PDI	EB1/BZLF1	-	TP53	L1243-191170	216.9	Histiocytoma (3)
VH-PDI	EBNA2	-	FCER2	-	-	-
VH-PDI	EBNA2	-	FGR	-	-	-
VH-PDI	EBNA2	-	CR2	-	-	-
VH-PDI	EBNA2	-	CR2	610927-120650	-	Systemic lupus erythematosus, susceptibility to, 9, 610927 (3)
VH-PDI	EBNA2	-	MYC	113970-190080	200.2	Burkitt lymphoma, 113970 (3)
VH-PDI	LMP1	-	BCL2	L3228-151430	208.9	Leukemia/lymphoma, B-cell, 2 (3)
VH-PDI	LMP1	-	BCL2	L1543-151430	208.9	Leukemia/lymphoma, B-cell, 2 (3)
PPI	BRRF1	TRAF2	TCEANC	-	-	-
PPI	BRRF1	TRAF2	FBF1	-	-	-
PPI	BRRF1	LZTS2	NINL	-	-	-
PPI	BRRF1	TRAF2	PSMF1	-	-	-
PPI	GB	TRAF2	PSMF1	-	-	-
PPI	GB	TRAF2	TCEANC	-	-	-
PPI	GB	TRAF2	FBF1	-	-	-
PPI	BARF1	SERTAD1	KLHDC5	-	-	-
PPI	BDLF2	PSME3	SERF2	-	-	-
PPI	BDLF3.5	SERTAD1	KLHDC5	-	-	-
PPI	BFLF2	PLSCR1	C10orf62	-	-	-
PPI	BFLF2	RBPMS	LZTS2	-	-	-
PPI	BFLF2	RBPMS	C9orf86	-	-	-
PPI	BFLF2	RBPMS	C1orf94	-	-	-
PPI	BFLF2	PLSCR1	C16orf48	-	-	-
PPI	BFLF2	UBE2I	NUDCD3	-	-	-
PPI	BFLF2	RBPMS	SMUG1	-	-	-
PPI	BFLF2	RBPMS	C16orf48	-	-	-
PPI	BFLF2	EFEMP2	RIBC2	-	-	-
PPI	BFLF2	UBE2I	DACH1	-	-	-
PPI	BFLF2	PLSCR1	SLC25A6	-	-	-
PPI	BFLF2	PLSCR1	ADAMTSL4	-	-	-
PPI	BFLF2	RBPMS	SERF2	-	-	-
PPI	BFLF2	EFEMP2	FAM115A	-	-	-
PPI	BFLF2	UBE2I	PHC1	-	-	-
PPI	BFLF2	GRN	FAM131C	-	-	-
PPI	BFRF1	GRN	FAM131C	-	-	-
PPI	BGRF1/BDRF1	TSC22D4	MTHFS	-	-	-
PPI	BGRF1/BDRF1	ENOX2	ENOX1	-	-	-
PPI	BGRF1/BDRF1	ENOX2	MAGEA11	-	-	-
PPI	BGRF1/BDRF1	TSC22D4	C16orf48	-	-	-
PPI	BHRF1	GRN	FAM131C	-	-	-
PPI	BILF1	GRN	FAM131C	-	-	-
PPI	BLLF2	GRN	FAM131C	-	-	-
PPI	BNLF2B	GRN	FAM131C	-	-	-
PPI	BOLF1	SERTAD1	KLHDC5	-	-	-
PPI	BPLF1	GRN	FAM131C	-	-	-
PPI	BRRF1	TRAF2	TRPT1	-	-	-
PPI	BRRF1	TRAF2	DVL2	-	-	-
PPI	BRRF1	TRAF2	NIF3L1	-	-	-
PPI	BRRF1	TRAF2	FXR2	-	-	-
PPI	BRRF1	TRAF2	ZBTB25	-	-	-
PPI	BRRF1	TRAF2	ZBTB43	-	-	-
PPI	BRRF1	TRAF2	NECAP2	-	-	-
PPI	BRRF1	TRAF2	RIBC2	-	-	-
PPI	BRRF1	TRAF2	CDKN1B	-	-	-
PPI	BRRF1	TRAF2	ZFAND6	-	-	-
PPI	BRRF1	TRAF2	QARS	-	-	-
PPI	BRRF1	TRAF2	C5orf55	-	-	-
PPI	BRRF1	TRAF2	SETD5	-	-	-
PPI	BRRF1	TRAF2	UBXN11	-	-	-
PPI	BRRF1	TRAF2	KIAA1267	-	-	-
PPI	BRRF1	TRAF2	RFX3	-	-	-
PPI	BRRF1	TRAF2	SPG21	248900-608181	284.01	Mast syndrome, 248900 (3)
PPI	BRRF1	TRAF2	CALCOCO2	-	-	-
PPI	BRRF1	TRAF2	RAD23A	-	-	-
PPI	BRRF1	PLSCR1	C16orf48	-	-	-
PPI	BRRF1	TRAF2	CHMP2B	600795-609512	-	Dementia, familial, nonspecific, 600795 (3)
PPI	BRRF1	LZTS2	ZNF581	-	-	-
PPI	BRRF1	TRAF2	TCEA2	-	-	-
PPI	BRRF1	TRAF2	THAP7	-	-	-
PPI	BRRF1	LZTS2	RHOXF2	-	-	-
PPI	BRRF1	TRAF2	TRAF2	-	-	-
PPI	BRRF1	TRAF2	KIAA0408	-	-	-
PPI	BRRF1	TRAF2	ITPK1	-	-	-
PPI	BRRF1	TRAF2	CDCA3	-	-	-
PPI	BRRF1	TRAF2	AASDHPPT	-	-	-
PPI	BRRF1	TRAF2	DLGAP5	-	-	-
PPI	BRRF1	TRAF2	RGS14	-	-	-
PPI	BRRF1	TRAF2	CHMP2B	L2769-609512	335.2	Amyotrophic lateral sclerosis, CHMP2B-related (3)
PPI	BRRF1	TRAF2	HINFP	-	-	-
PPI	BRRF1	TRAF2	USP53	-	-	-
PPI	BRRF1	PLSCR1	ADAMTSL4	-	-	-
PPI	BRRF1	NTN4	ADAMTSL4	-	-	-
PPI	BRRF1	TRAF2	FBXO28	-	-	-
PPI	BRRF1	TRAF2	ZNF646	-	-	-
PPI	BRRF1	TRAF2	TCEB3B	-	-	-
PPI	BRRF1	LZTS2	TRIM29	-	-	-
PPI	BRRF1	TRAF2	AFF4	-	-	-
PPI	BRRF1	TRAF2	SOX30	-	-	-
PPI	BRRF1	TRAF2	LZTS2	-	-	-
PPI	BRRF1	TRAF2	CCDC33	-	-	-
PPI	BRRF1	TRAF2	GORASP2	-	-	-
PPI	BRRF1	TRAF2	APPL1	-	-	-
PPI	BRRF1	TRAF2	APEX2	-	-	-
PPI	BRRF1	TRAF2	SPRY2	-	-	-
PPI	BRRF1	TRAF2	IPO11	-	-	-
PPI	BRRF1	LZTS2	PAK7	-	-	-
PPI	BRRF1	TRAF2	NRIP1	-	-	-
PPI	BRRF1	TRAF2	TRAF3IP2	-	-	-
PPI	BRRF1	TRAF2	TRIM31	-	-	-
PPI	BRRF1	LZTS2	CCDC85B	-	-	-
PPI	BRRF1	LZTS2	RBPMS	-	-	-
PPI	BRRF1	TRAF2	FAM107A	-	-	-
PPI	BRRF1	TRAF2	ABLIM1	-	-	-
PPI	BRRF1	TRAF2	BIRC2	-	-	-
PPI	BRRF1	TRAF2	USP2	-	-	-
PPI	BRRF1	TRAF2	ZNF205	-	-	-
PPI	BRRF1	TRAF2	LNX1	-	-	-
PPI	BRRF1	TRAF2	DTNB	-	-	-
PPI	BRRF1	PLSCR1	SLC25A6	-	-	-
PPI	BRRF1	LZTS2	TRAF2	-	-	-
PPI	BRRF1	TRAF2	CDKN1B	610755-600778	-	Multiple endocrine neoplasia, type IV, 610755 (3)
PPI	BRRF1	TRAF2	PIN1	-	-	-
PPI	BRRF1	TRAF2	BANP	-	-	-
PPI	BRRF1	TRAF2	CCDC130	-	-	-
PPI	BRRF1	TRAF2	CRY1	-	-	-
PPI	BRRF1	TRAF2	FATE1	-	-	-
PPI	BRRF1	TRAF2	TRAF6	-	-	-
PPI	BRRF1	TRAF2	IRF4	L3343-601900	203	Multiple myeloma (3)
PPI	BRRF1	TRAF2	IRF4	L1793-601900	203	Multiple myeloma (3)
PPI	BRRF1	TRAF2	SPATA2	-	-	-
PPI	BRRF1	TRAF2	ZBTB16	L3220-176797	208.9	Leukemia, acute promyelocytic, PL2F/RARA type (3)
PPI	BRRF1	TRAF2	FAM120B	-	-	-
PPI	BRRF1	TRAF2	NUDT18	-	-	-
PPI	BRRF1	TRAF2	BAHD1	-	-	-
PPI	BRRF1	PLSCR1	C10orf62	-	-	-
PPI	BRRF1	TRAF2	ZBTB16	L1532-176797	208.9	Leukemia, acute promyelocytic, PL2F/RARA type (3)
PPI	BRRF1	TRAF2	C16orf48	-	-	-
PPI	BVRF1	EFEMP2	FAM115A	-	-	-
PPI	BVRF1	PSME3	SERF2	-	-	-
PPI	BVRF1	EFEMP2	RIBC2	-	-	-
PPI	BZLF2	GRN	FAM131C	-	-	-
PPI	EB1/BZLF1	ENOX2	MAGEA11	-	-	-
PPI	EB1/BZLF1	ENOX2	ENOX1	-	-	-
PPI	EBNA1	MDFI	METT11D1	-	-	-
PPI	EBNA1	MDFI	RFX2	-	-	-
PPI	EBNA1	MDFI	CCDC116	-	-	-
PPI	EBNA1	MDFI	SERF2	-	-	-
PPI	EBNA1	MDFI	SFI1	-	-	-
PPI	EBNA1	MDFI	C16orf48	-	-	-
PPI	EBNA2	EFEMP2	RIBC2	-	-	-
PPI	EBNA2	EFEMP2	FAM115A	-	-	-
PPI	GB	TRAF2	RFX3	-	-	-
PPI	GB	VIM	KIAA0408	-	-	-
PPI	GB	VIM	GOPC	-	-	-
PPI	GB	TRAF2	NIF3L1	-	-	-
PPI	GB	TRAF2	DLGAP5	-	-	-
PPI	GB	TRAF2	KIAA0408	-	-	-
PPI	GB	TRAF2	GORASP2	-	-	-
PPI	GB	VIM	PDLIM1	-	-	-
PPI	GB	TRAF2	ZNF205	-	-	-
PPI	GB	TRAF2	BANP	-	-	-
PPI	GB	TRAF2	DTNB	-	-	-
PPI	GB	TRAF2	ZNF646	-	-	-
PPI	GB	TRAF2	AASDHPPT	-	-	-
PPI	GB	VIM	PSMA1	-	-	-
PPI	GB	VIM	TCHP	-	-	-
PPI	GB	TRAF2	FAM107A	-	-	-
PPI	GB	TRAF2	RGS14	-	-	-
PPI	GB	TRAF2	TRIM31	-	-	-
PPI	GB	TRAF2	CCDC130	-	-	-
PPI	GB	TRAF2	APEX2	-	-	-
PPI	GB	TRAF2	SPG21	248900-608181	284.01	Mast syndrome, 248900 (3)
PPI	GB	VIM	GFAP	203450-137780	781.99	Alexander disease, 203450 (3)
PPI	GB	TRAF2	APPL1	-	-	-
PPI	GB	TRAF2	ZFAND6	-	-	-
PPI	GB	TRAF2	TRAF2	-	-	-
PPI	GB	TRAF2	SPATA2	-	-	-
PPI	GB	TRAF2	ITPK1	-	-	-
PPI	GB	TRAF2	SPRY2	-	-	-
PPI	GB	TRAF2	CRY1	-	-	-
PPI	GB	TRAF2	ABLIM1	-	-	-
PPI	GB	VIM	NIF3L1	-	-	-
PPI	GB	TRAF2	CHMP2B	L2769-609512	335.2	Amyotrophic lateral sclerosis, CHMP2B-related (3)
PPI	GB	UBXN11	C6orf165	-	-	-
PPI	GB	AP2B1	RIBC2	-	-	-
PPI	GB	TRAF2	ZBTB16	L1532-176797	208.9	Leukemia, acute promyelocytic, PL2F/RARA type (3)
PPI	GB	TRAF2	CCDC33	-	-	-
PPI	GB	TRAF2	FAM120B	-	-	-
PPI	GB	TRAF2	C16orf48	-	-	-
PPI	GB	TRAF2	FXR2	-	-	-
PPI	GB	TRAF2	RIBC2	-	-	-
PPI	GB	TRAF2	C5orf55	-	-	-
PPI	GB	VIM	ALS2CR11	-	-	-
PPI	GB	TRAF2	DVL2	-	-	-
PPI	GB	TRAF2	USP53	-	-	-
PPI	GB	TRAF2	FBXO28	-	-	-
PPI	GB	TRAF2	ZBTB25	-	-	-
PPI	GB	TRAF2	CALCOCO2	-	-	-
PPI	GB	TRAF2	ZBTB43	-	-	-
PPI	GB	TRAF2	CDKN1B	610755-600778	-	Multiple endocrine neoplasia, type IV, 610755 (3)
PPI	GB	TRAF2	SOX30	-	-	-
PPI	GB	TRAF2	SETD5	-	-	-
PPI	GB	VIM	TUBGCP4	-	-	-
PPI	GB	VIM	GOPC	102530-606845	-	Globozoospermia, 102530 (1) ()
PPI	GB	TRAF2	LNX1	-	-	-
PPI	GB	TRAF2	BIRC2	-	-	-
PPI	GB	TRAF2	RAD23A	-	-	-
PPI	GB	TRAF2	IRF4	L1793-601900	203	Multiple myeloma (3)
PPI	GB	VIM	FAM107A	-	-	-
PPI	GB	VIM	KRT20	-	-	-
PPI	GB	TRAF2	UBXN11	-	-	-
PPI	GB	TRAF2	CDCA3	-	-	-
PPI	GB	TRAF2	IPO11	-	-	-
PPI	GB	TRAF2	TCEB3B	-	-	-
PPI	GB	TRAF2	USP2	-	-	-
PPI	GB	UBXN11	TRAF2	-	-	-
PPI	GB	TRAF2	TCEA2	-	-	-
PPI	GB	TRAF2	CDKN1B	-	-	-
PPI	GB	TRAF2	FATE1	-	-	-
PPI	GB	TRAF2	TRAF6	-	-	-
PPI	GB	TRAF2	NUDT18	-	-	-
PPI	GB	TRAF2	ZBTB16	L3220-176797	208.9	Leukemia, acute promyelocytic, PL2F/RARA type (3)
PPI	GB	TRAF2	LZTS2	-	-	-
PPI	GB	TRAF2	TRPT1	-	-	-
PPI	GB	TRAF2	QARS	-	-	-
PPI	GB	TRAF2	AFF4	-	-	-
PPI	GB	TRAF2	HINFP	-	-	-
PPI	GB	TRAF2	NRIP1	-	-	-
PPI	GB	TRAF2	KIAA1267	-	-	-
PPI	GB	TRAF2	CHMP2B	600795-609512	-	Dementia, familial, nonspecific, 600795 (3)
PPI	GB	TRAF2	NECAP2	-	-	-
PPI	GB	TRAF2	PIN1	-	-	-
PPI	GB	TRAF2	TRAF3IP2	-	-	-
PPI	GB	VIM	RIBC2	-	-	-
PPI	GB	VIM	ABLIM1	-	-	-
PPI	GB	TRAF2	THAP7	-	-	-
PPI	GB	TRAF2	IRF4	L3343-601900	203	Multiple myeloma (3)
PPI	GB	VIM	APIP	-	-	-
PPI	GB	GRN	FAM131C	-	-	-
PPI	GB	VIM	NOC4L	-	-	-
PPI	GB	TRAF2	BAHD1	-	-	-
PPI	TK	TSC22D4	MTHFS	-	-	-
PPI	TK	TSC22D4	C16orf48	-	-	-
PPI	TK	ENOX2	MAGEA11	-	-	-
PPI	TK	ENOX2	ENOX1	-	-	-
PPI	BARF1	ACTN1	MYOZ1	-	-	-
PPI	BARF1	ACTN1	XRCC4	-	-	-
PPI	BARF1	ACTN1	MAGEA11	-	-	-
PPI	BDLF2	PSME3	BBS2	209900-606151	759.89	Bardet-Biedl syndrome 2, 209900 (3)
PPI	BDLF2	PSME3	ITPKB	-	-	-
PPI	BDLF2	PSME3	ZCCHC10	-	-	-
PPI	BDLF2	PSME3	FXR2	-	-	-
PPI	BDLF2	PSME3	WDR25	-	-	-
PPI	BDLF2	PSME3	KIAA1267	-	-	-
PPI	BDLF2	PSME3	NUDT18	-	-	-
PPI	BDLF3	HOMER3	DYNLL2	-	-	-
PPI	BFLF2	RBPMS	STRBP	-	-	-
PPI	BFLF2	EFEMP2	HOXA1	601536-142955	758	Athabaskan brainstem dysgenesis syndrome, 601536 (3)
PPI	BFLF2	PLSCR1	NPDC1	-	-	-
PPI	BFLF2	PLSCR1	SLC35A2	218800-191740	277.4	Crigler-Najjar syndrome, type I, 218800 (3)
PPI	BFLF2	RBPMS	OTX1	-	-	-
PPI	BFLF2	RBPMS	POM121	-	-	-
PPI	BFLF2	RBPMS	SF1	L2424-184757	302.9	Sex reversal, XY, with adrenal failure (3)
PPI	BFLF2	PLSCR1	KRTAP4-12	-	-	-
PPI	BFLF2	PLSCR1	NEU4	-	-	-
PPI	BFLF2	RBPMS	RBPMS	-	-	-
PPI	BFLF2	PLSCR1	CPSF3L	-	-	-
PPI	BFLF2	PLSCR1	ZBTB16	L3220-176797	208.9	Leukemia, acute promyelocytic, PL2F/RARA type (3)
PPI	BFLF2	PLSCR1	TFG	612237-602498	-	Chondrosarcoma, extraskeletal myxoid, 612237 (1)
PPI	BFLF2	EFEMP2	RHOXF2	-	-	-
PPI	BFLF2	PLSCR1	MED15	-	-	-
PPI	BFLF2	RBPMS	EYA2	-	-	-
PPI	BFLF2	EFEMP2	RHPN1	-	-	-
PPI	BFLF2	PLSCR1	SLC35A2	237900-191740	782.4	Hyperbilirubinemia, familial transcient neonatal, 237900 (3)
PPI	BFLF2	PLSCR1	C4orf42	-	-	-
PPI	BFLF2	RBPMS	EWSR1	L997-133450	170.9	Ewing sarcoma (3)
PPI	BFLF2	PLSCR1	CRK	-	-	-
PPI	BFLF2	PLSCR1	EWSR1	612219-133450	-	Neuroepithelioma, 612219 (3)
PPI	BFLF2	EFEMP2	AQP1	L3598-107776	281.4	Aquaporin-1 deficiency (3)
PPI	BFLF2	EFEMP2	LINGO1	-	-	-
PPI	BFLF2	PLSCR1	HOXB6	-	-	-
PPI	BFLF2	EFEMP2	SGTB	-	-	-
PPI	BFLF2	RBPMS	HOXA9	-	-	-
PPI	BFLF2	BAT3	KLHL12	-	-	-
PPI	BFLF2	PLSCR1	PLSCR3	-	-	-
PPI	BFLF2	UBE2I	ZNF646	-	-	-
PPI	BFLF2	PLSCR1	NECAP2	-	-	-
PPI	BFLF2	PLSCR1	FAM113A	-	-	-
PPI	BFLF2	RBPMS	ARHGAP9	-	-	-
PPI	BFLF2	RBPMS	DAZAP2	-	-	-
PPI	BFLF2	RBPMS	NEU4	-	-	-
PPI	BFLF2	RBPMS	FXR2	-	-	-
PPI	BFLF2	PLSCR1	ILF3	-	-	-
PPI	BFLF2	EFEMP2	FAM124B	-	-	-
PPI	BFLF2	PLSCR1	ZNF581	-	-	-
PPI	BFLF2	EFEMP2	GLRX3	-	-	-
PPI	BFLF2	BAT3	EFEMP2	219100-604633	756.83	Cutis laxa, autosomal recessive, type I, 219100 (3)
PPI	BFLF2	UBE2I	CHMP4B	605387-610897	-	Cataract, posterior polar, 3, 605387 (3)
PPI	BFLF2	UBE2I	CHMP4B	-	-	-
PPI	BFLF2	RBPMS	CNNM3	-	-	-
PPI	BFLF2	RBPMS	FAM103A1	-	-	-
PPI	BFLF2	RBPMS	FOXS1	-	-	-
PPI	BFLF2	RBPMS	RHOXF2	-	-	-
PPI	BFLF2	PLSCR1	OGDH	-	-	-
PPI	BFLF2	RBPMS	PITX1	-	-	-
PPI	BFLF2	GRN	HOXA1	601536-142955	758	Athabaskan brainstem dysgenesis syndrome, 601536 (3)
PPI	BFLF2	RBPMS	C12orf12	-	-	-
PPI	BFLF2	UBE2I	PIAS2	-	-	-
PPI	BFLF2	PLSCR1	C10orf10	-	-	-
PPI	BFLF2	PLSCR1	CCDC33	-	-	-
PPI	BFLF2	UBE2I	TRIM29	-	-	-
PPI	BFLF2	PLSCR1	GPRIN2	-	-	-
PPI	BFLF2	UBE2I	MAPK1IP1L	-	-	-
PPI	BFLF2	RBPMS	C2orf51	-	-	-
PPI	BFLF2	RBPMS	CDC42EP1	-	-	-
PPI	BFLF2	UBE2I	SMAD4	L2082-600993	157.8	Pancreatic cancer (3)
PPI	BFLF2	PLSCR1	GNAI2	192605-139360	427.1	Ventricular tachycardia, idiopathic, 192605 (3)
PPI	BFLF2	EFEMP2	ZNF426	-	-	-
PPI	BFLF2	EFEMP2	CATSPER1	-	-	-
PPI	BFLF2	PLSCR1	HEY2	-	-	-
PPI	BFLF2	RBPMS	TOLLIP	-	-	-
PPI	BFLF2	ACTN1	MAGEA11	-	-	-
PPI	BFLF2	PLSCR1	EWSR1	L997-133450	170.9	Ewing sarcoma (3)
PPI	BFLF2	EFEMP2	IL16	-	-	-
PPI	BFLF2	RBPMS	SF1	L3504-184757	302.9	Sex reversal, XY, with/without adrenal failure (3)
PPI	BFLF2	PLSCR1	FAM103A1	-	-	-
PPI	BFLF2	EFEMP2	LRDD	-	-	-
PPI	BFLF2	PLSCR1	ZBTB16	L1532-176797	208.9	Leukemia, acute promyelocytic, PL2F/RARA type (3)
PPI	BFLF2	PLSCR1	EWSR1	L538-133450	170.9	Chondrosarcoma, extraskeletal myxoid (3)
PPI	BFLF2	RBPMS	DTX2	-	-	-
PPI	BFLF2	PLSCR1	SPRY2	-	-	-
PPI	BFLF2	EFEMP2	APEX2	-	-	-
PPI	BFLF2	EFEMP2	ZNF263	-	-	-
PPI	BFLF2	EFEMP2	HHEX	-	-	-
PPI	BFLF2	PLSCR1	HOXA9	-	-	-
PPI	BFLF2	RBPMS	SF1	L52-184757	255.4	Adrenocortical insufficiency without ovarian defect (3)
PPI	BFLF2	RBPMS	ZC3H10	-	-	-
PPI	BFLF2	UBE2I	SMAD4	174900-600993	211.3	Polyposis, juvenile intestinal, 174900 (3)
PPI	BFLF2	PLSCR1	OGDH	L4047-203740	-	Alpha-ketoglutarate dehydrogenase deficiency (1)
PPI	BFLF2	RBPMS	HOXB9	-	-	-
PPI	BFLF2	PLSCR1	KIAA1683	-	-	-
PPI	BFLF2	PLSCR1	SPG7	607259-602783	94	Spastic paraplegia-7, 607259 (3)
PPI	BFLF2	EFEMP2	PLSCR4	-	-	-
PPI	BFLF2	RBPMS	TRIP13	-	-	-
PPI	BFLF2	RBPMS	C9orf100	-	-	-
PPI	BFLF2	EFEMP2	BAT3	-	-	-
PPI	BFLF2	EFEMP2	FAM107A	-	-	-
PPI	BFLF2	RBPMS	KIAA0182	-	-	-
PPI	BFLF2	RBPMS	PHF1	-	-	-
PPI	BFLF2	UBE2I	SATB1	-	-	-
PPI	BFLF2	RBPMS	CCNK	-	-	-
PPI	BFLF2	UBE2I	ZNF451	-	-	-
PPI	BFLF2	RBPMS	HEYL	-	-	-
PPI	BFLF2	PLSCR1	RASD1	-	-	-
PPI	BFLF2	RBPMS	LRRC41	-	-	-
PPI	BFLF2	PLSCR1	SMCP	L3301-309605	319	Mental retardation, X-linked, syndromic-4, with congenital contractures and low fingertip arches (2)
PPI	BFLF2	EFEMP1	SGTA	-	-	-
PPI	BFLF2	EFEMP2	CCND3	-	-	-
PPI	BFLF2	PLSCR1	SLC35A2	143500-191740	277.4	Gilbert syndrome, 143500 (3)
PPI	BFLF2	EFEMP2	COL8A1	-	-	-
PPI	BFLF2	EFEMP2	CCNK	-	-	-
PPI	BFLF2	RBPMS	PDLIM4	166710-603422	733	Osteoporosis, susceptibility to, 166710 (3)
PPI	BFLF2	UBE2I	RIPK2	-	-	-
PPI	BFLF2	RBPMS	SF1	L4314-184757	-	Disorder of sex development, 46XY (3)
PPI	BFLF2	RBPMS	RBM9	-	-	-
PPI	BFLF2	UBE2I	IKZF3	-	-	-
PPI	BFLF2	PLSCR1	GLRX3	-	-	-
PPI	BFLF2	UBE2I	SMAD4	L3425-600993	157.8	Pancreatic cancer (3)
PPI	BFLF2	PLSCR1	DAZAP2	-	-	-
PPI	BFLF2	PLSCR1	IP6K2	-	-	-
PPI	BFLF2	UBE2I	ZBED1	-	-	-
PPI	BFLF2	RBPMS	EWSR1	612219-133450	-	Neuroepithelioma, 612219 (3)
PPI	BFLF2	PLSCR1	NOC4L	-	-	-
PPI	BFLF2	UBE2I	RAD54B	L1614-604289	202.8	Lymphoma, non-Hodgkin (3)
PPI	BFLF2	EFEMP2	SGTA	-	-	-
PPI	BFLF2	RBPMS	EWSR1	L538-133450	170.9	Chondrosarcoma, extraskeletal myxoid (3)
PPI	BFLF2	PLSCR1	EFEMP2	219100-604633	756.83	Cutis laxa, autosomal recessive, type I, 219100 (3)
PPI	BFLF2	HOMER3	DYNLL2	-	-	-
PPI	BFLF2	RBPMS	ZNF581	-	-	-
PPI	BFLF2	PLSCR1	C10orf10	102530-606845	-	Globozoospermia, 102530 (1) ()
PPI	BFLF2	PLSCR1	LASP1	-	-	-
PPI	BFLF2	PLSCR1	TFG	-	-	-
PPI	BFLF2	PLSCR1	ZNF638	-	-	-
PPI	BFLF2	PLSCR1	HOXA1	601536-142955	758	Athabaskan brainstem dysgenesis syndrome, 601536 (3)
PPI	BFLF2	PLSCR1	FBXL18	-	-	-
PPI	BFLF2	ACTN1	MYOZ1	-	-	-
PPI	BFLF2	UBE2I	IKZF1	L3200-603023	208.9	Leukemia, acute lymphoblastic (3)
PPI	BFLF2	UBE2I	IKZF1	L1510-603023	208.9	Leukemia, acute lymphoblastic (3)
PPI	BFLF2	PLSCR1	PLSCR4	-	-	-
PPI	BFLF2	PLSCR1	DHRS1	-	-	-
PPI	BFLF2	PLSCR1	GNAI2	L2148-139360	258	Pituitary ACTH-secreting adenoma (3)
PPI	BFLF2	UBE2I	RAD54B	L3253-604289	202.8	Lymphoma, non-Hodgkin (3)
PPI	BFLF2	RBPMS	FASTK	-	-	-
PPI	BFLF2	PLSCR1	PHLDA1	-	-	-
PPI	BFLF2	PLSCR1	SLC35A2	606785-191740	277.4	Crigler-Najjar syndrome, type II, 606785 (3)
PPI	BFLF2	PLSCR1	SF1	L52-184757	255.4	Adrenocortical insufficiency without ovarian defect (3)
PPI	BFLF2	UBE2I	HNRNPK	-	-	-
PPI	BFLF2	EFEMP2	ZNF638	-	-	-
PPI	BFLF2	PLSCR1	CPSF6	-	-	-
PPI	BFLF2	EFEMP2	AQP1	110450-107776	-	Blood group, Colton, 110450 (3)
PPI	BFLF2	EFEMP2	AQP1	L187-107776	281.4	Aquaporin-1 deficiency (3)
PPI	BFLF2	PLSCR1	CRY1	-	-	-
PPI	BFLF2	PLSCR1	DTX2	-	-	-
PPI	BFLF2	PLSCR1	VASP	-	-	-
PPI	BFLF2	RBPMS	GRAP2	-	-	-
PPI	BFLF2	PLSCR1	CNTFR	-	-	-
PPI	BFLF2	PLSCR1	EXD3	-	-	-
PPI	BFLF2	ACTN1	XRCC4	-	-	-
PPI	BFLF2	RBPMS	DVL2	-	-	-
PPI	BFLF2	PLSCR1	ANXA11	-	-	-
PPI	BFLF2	UBE2I	PDLIM7	-	-	-
PPI	BFLF2	PLSCR1	DLK2	-	-	-
PPI	BFLF2	UBE2I	RAD54B	L576-604289	153	Colon adenocarcinoma (3)
PPI	BFLF2	PLSCR1	CDC42EP1	-	-	-
PPI	BFLF2	EFEMP2	PLSCR1	-	-	-
PPI	BFLF2	UBE2I	SMAD4	175050-600993	448	Juvenile polyposis/hereditary hemorrhagic telangiectasia syndrome, 175050 (3)
PPI	BFLF2	RBPMS	PIN1	-	-	-
PPI	BFLF2	EFEMP2	UBQLN1	-	-	-
PPI	BFLF2	PLSCR1	SF1	L2424-184757	302.9	Sex reversal, XY, with adrenal failure (3)
PPI	BFLF2	RBPMS	CDC23	-	-	-
PPI	BFLF2	PLSCR1	YIPF3	-	-	-
PPI	BFLF2	PLSCR1	C12orf12	-	-	-
PPI	BFLF2	PLSCR1	ZNF764	-	-	-
PPI	BFLF2	PLSCR1	NTN4	-	-	-
PPI	BFLF2	PLSCR1	C10orf54	-	-	-
PPI	BFLF2	UBE2I	C18orf25	-	-	-
PPI	BFLF2	PLSCR1	SF1	L3504-184757	302.9	Sex reversal, XY, with/without adrenal failure (3)
PPI	BFLF2	UBE2I	HNRNPC	-	-	-
PPI	BFLF2	PLSCR1	ATG12	-	-	-
PPI	BFLF2	PLSCR1	SF1	L4314-184757	-	Disorder of sex development, 46XY (3)
PPI	BFLF2	UBE2I	HGS	-	-	-
PPI	BFRF1	GRN	HOXA1	601536-142955	758	Athabaskan brainstem dysgenesis syndrome, 601536 (3)
PPI	BGLF2	OPTN	TBC1D17	-	-	-
PPI	BGLF2	HOMER3	DYNLL2	-	-	-
PPI	BGLF2	OPTN	CCDC53	-	-	-
PPI	BGRF1/BDRF1	TSC22D4	SYT17	-	-	-
PPI	BGRF1/BDRF1	TSC22D4	ZMYND10	-	-	-
PPI	BGRF1/BDRF1	TSC22D4	UBLCP1	-	-	-
PPI	BGRF1/BDRF1	TSC22D4	ZNF580	-	-	-
PPI	BGRF1/BDRF1	TSC22D4	NOC4L	-	-	-
PPI	BGRF1/BDRF1	TSC22D4	FRMD6	-	-	-
PPI	BGRF1/BDRF1	TSC22D4	LNX1	-	-	-
PPI	BGRF1/BDRF1	TSC22D4	ABLIM1	-	-	-
PPI	BGRF1/BDRF1	TSC22D4	GNB2L1	-	-	-
PPI	BGRF1/BDRF1	TSC22D4	CCNK	-	-	-
PPI	BGRF1/BDRF1	TSC22D4	CCDC42	-	-	-
PPI	BGRF1/BDRF1	TSC22D4	CKS2	-	-	-
PPI	BGRF1/BDRF1	TSC22D4	CCDC33	-	-	-
PPI	BGRF1/BDRF1	TSC22D4	CDK5R1	-	-	-
PPI	BGRF1/BDRF1	TSC22D4	PIH1D1	-	-	-
PPI	BGRF1/BDRF1	TSC22D4	TEX11	-	-	-
PPI	BGRF1/BDRF1	TSC22D4	GORASP2	-	-	-
PPI	BGRF1/BDRF1	TSC22D4	PIN1	-	-	-
PPI	BGRF1/BDRF1	TSC22D4	MAD2L1	-	-	-
PPI	BGRF1/BDRF1	TSC22D4	CDC23	-	-	-
PPI	BGRF1/BDRF1	TSC22D4	NIF3L1	-	-	-
PPI	BHRF1	GRN	HOXA1	601536-142955	758	Athabaskan brainstem dysgenesis syndrome, 601536 (3)
PPI	BHRF1	ACTN1	MAGEA11	-	-	-
PPI	BHRF1	ACTN1	MYOZ1	-	-	-
PPI	BHRF1	ACTN1	XRCC4	-	-	-
PPI	BILF1	HOMER3	DYNLL2	-	-	-
PPI	BILF1	GRN	HOXA1	601536-142955	758	Athabaskan brainstem dysgenesis syndrome, 601536 (3)
PPI	BLLF1	HOMER3	DYNLL2	-	-	-
PPI	BLLF2	GRN	HOXA1	601536-142955	758	Athabaskan brainstem dysgenesis syndrome, 601536 (3)
PPI	BNLF2B	GRN	HOXA1	601536-142955	758	Athabaskan brainstem dysgenesis syndrome, 601536 (3)
PPI	BPLF1	GRN	HOXA1	601536-142955	758	Athabaskan brainstem dysgenesis syndrome, 601536 (3)
PPI	BRRF1	PLSCR1	SF1	L4314-184757	-	Disorder of sex development, 46XY (3)
PPI	BRRF1	PLSCR1	SF1	L2424-184757	302.9	Sex reversal, XY, with adrenal failure (3)
PPI	BRRF1	PLSCR1	FAM113A	-	-	-
PPI	BRRF1	PLSCR1	DTX2	-	-	-
PPI	BRRF1	PLSCR1	ZNF638	-	-	-
PPI	BRRF1	PLSCR1	RASD1	-	-	-
PPI	BRRF1	PLSCR1	ATG12	-	-	-
PPI	BRRF1	PLSCR1	SF1	L52-184757	255.4	Adrenocortical insufficiency without ovarian defect (3)
PPI	BRRF1	NTN4	PLSCR1	-	-	-
PPI	BRRF1	PLSCR1	YIPF3	-	-	-
PPI	BRRF1	PLSCR1	SF1	L3504-184757	302.9	Sex reversal, XY, with/without adrenal failure (3)
PPI	BRRF1	PLSCR1	KRTAP4-12	-	-	-
PPI	BRRF1	PLSCR1	MED15	-	-	-
PPI	BRRF1	PLSCR1	EWSR1	L538-133450	170.9	Chondrosarcoma, extraskeletal myxoid (3)
PPI	BRRF1	PLSCR1	PLSCR4	-	-	-
PPI	BRRF1	PLSCR1	CCDC33	-	-	-
PPI	BRRF1	PLSCR1	ANXA11	-	-	-
PPI	BRRF1	PLSCR1	OGDH	-	-	-
PPI	BRRF1	PLSCR1	IP6K2	-	-	-
PPI	BRRF1	TRAF2	TIFA	-	-	-
PPI	BRRF1	PLSCR1	CRY1	-	-	-
PPI	BRRF1	PLSCR1	C4orf42	-	-	-
PPI	BRRF1	PLSCR1	KIAA1683	-	-	-
PPI	BRRF1	PLSCR1	TFG	-	-	-
PPI	BRRF1	PLSCR1	HOXB6	-	-	-
PPI	BRRF1	PLSCR1	NEU4	-	-	-
PPI	BRRF1	PLSCR1	PLSCR3	-	-	-
PPI	BRRF1	PLSCR1	EWSR1	612219-133450	-	Neuroepithelioma, 612219 (3)
PPI	BRRF1	PLSCR1	HEY2	-	-	-
PPI	BRRF1	PLSCR1	GPRIN2	-	-	-
PPI	BRRF1	PLSCR1	NOC4L	-	-	-
PPI	BRRF1	PLSCR1	EWSR1	L997-133450	170.9	Ewing sarcoma (3)
PPI	BRRF1	PLSCR1	VASP	-	-	-
PPI	BRRF1	PLSCR1	PHLDA1	-	-	-
PPI	BRRF1	PLSCR1	HOXA1	601536-142955	758	Athabaskan brainstem dysgenesis syndrome, 601536 (3)
PPI	BRRF1	PLSCR1	OGDH	L4047-203740	-	Alpha-ketoglutarate dehydrogenase deficiency (1)
PPI	BRRF1	PLSCR1	FAM103A1	-	-	-
PPI	BRRF1	PLSCR1	EXD3	-	-	-
PPI	BRRF1	PLSCR1	C10orf10	102530-606845	-	Globozoospermia, 102530 (1) ()
PPI	BRRF1	PLSCR1	SMCP	L3301-309605	319	Mental retardation, X-linked, syndromic-4, with congenital contractures and low fingertip arches (2)
PPI	BRRF1	PLSCR1	NPDC1	-	-	-
PPI	BRRF1	PLSCR1	SLC35A2	606785-191740	277.4	Crigler-Najjar syndrome, type II, 606785 (3)
PPI	BRRF1	PLSCR1	CRK	-	-	-
PPI	BRRF1	PLSCR1	HOXA9	-	-	-
PPI	BRRF1	PLSCR1	FBXL18	-	-	-
PPI	BRRF1	PLSCR1	DAZAP2	-	-	-
PPI	BRRF1	PLSCR1	CPSF3L	-	-	-
PPI	BRRF1	PLSCR1	SLC35A2	143500-191740	277.4	Gilbert syndrome, 143500 (3)
PPI	BRRF1	PLSCR1	ZNF581	-	-	-
PPI	BRRF1	PLSCR1	SPRY2	-	-	-
PPI	BRRF1	PLSCR1	GNAI2	L2148-139360	258	Pituitary ACTH-secreting adenoma (3)
PPI	BRRF1	PLSCR1	C12orf12	-	-	-
PPI	BRRF1	PLSCR1	ZBTB16	L3220-176797	208.9	Leukemia, acute promyelocytic, PL2F/RARA type (3)
PPI	BRRF1	PLSCR1	ZNF764	-	-	-
PPI	BRRF1	PLSCR1	EFEMP2	219100-604633	756.83	Cutis laxa, autosomal recessive, type I, 219100 (3)
PPI	BRRF1	PLSCR1	SLC35A2	237900-191740	782.4	Hyperbilirubinemia, familial transcient neonatal, 237900 (3)
PPI	BRRF1	PLSCR1	ILF3	-	-	-
PPI	BRRF1	PLSCR1	LASP1	-	-	-
PPI	BRRF1	PLSCR1	DLK2	-	-	-
PPI	BRRF1	PLSCR1	GLRX3	-	-	-
PPI	BRRF1	PLSCR1	ZBTB16	L1532-176797	208.9	Leukemia, acute promyelocytic, PL2F/RARA type (3)
PPI	BRRF1	PLSCR1	GNAI2	192605-139360	427.1	Ventricular tachycardia, idiopathic, 192605 (3)
PPI	BRRF1	PLSCR1	SLC35A2	218800-191740	277.4	Crigler-Najjar syndrome, type I, 218800 (3)
PPI	BRRF1	PLSCR1	CDC42EP1	-	-	-
PPI	BRRF1	PLSCR1	DHRS1	-	-	-
PPI	BRRF1	PLSCR1	TFG	612237-602498	-	Chondrosarcoma, extraskeletal myxoid, 612237 (1)
PPI	BRRF1	PLSCR1	NECAP2	-	-	-
PPI	BRRF1	PLSCR1	C10orf10	-	-	-
PPI	BRRF1	PLSCR1	C10orf54	-	-	-
PPI	BRRF1	PLSCR1	CPSF6	-	-	-
PPI	BRRF1	PLSCR1	NTN4	-	-	-
PPI	BRRF1	PLSCR1	CNTFR	-	-	-
PPI	BRRF1	PLSCR1	SPG7	607259-602783	94	Spastic paraplegia-7, 607259 (3)
PPI	BRRF1	EFEMP1	SGTA	-	-	-
PPI	BVRF1	EFEMP2	ZNF426	-	-	-
PPI	BVRF1	EFEMP2	APEX2	-	-	-
PPI	BVRF1	PSME3	WDR25	-	-	-
PPI	BVRF1	EFEMP2	LRDD	-	-	-
PPI	BVRF1	EFEMP2	RHPN1	-	-	-
PPI	BVRF1	TSG101	HGS	-	-	-
PPI	BVRF1	EFEMP2	HOXA1	601536-142955	758	Athabaskan brainstem dysgenesis syndrome, 601536 (3)
PPI	BVRF1	NCKIPSD	BAIAP2	-	-	-
PPI	BVRF1	PSME3	ZCCHC10	-	-	-
PPI	BVRF1	TSG101	PPFIBP2	-	-	-
PPI	BVRF1	PSME3	BBS2	209900-606151	759.89	Bardet-Biedl syndrome 2, 209900 (3)
PPI	BVRF1	EFEMP2	AQP1	L187-107776	281.4	Aquaporin-1 deficiency (3)
PPI	BVRF1	EFEMP2	SGTA	-	-	-
PPI	BVRF1	EFEMP2	AQP1	L3598-107776	281.4	Aquaporin-1 deficiency (3)
PPI	BVRF1	PSME3	KIAA1267	-	-	-
PPI	BVRF1	EFEMP2	UBQLN1	-	-	-
PPI	BVRF1	EFEMP2	ZNF263	-	-	-
PPI	BVRF1	TSG101	CEP55	-	-	-
PPI	BVRF1	EFEMP2	PLSCR4	-	-	-
PPI	BVRF1	EFEMP2	ZNF638	-	-	-
PPI	BVRF1	EFEMP2	AQP1	110450-107776	-	Blood group, Colton, 110450 (3)
PPI	BVRF1	PSME3	ITPKB	-	-	-
PPI	BVRF1	EFEMP2	FAM107A	-	-	-
PPI	BVRF1	EFEMP2	GLRX3	-	-	-
PPI	BVRF1	EFEMP2	IL16	-	-	-
PPI	BVRF1	TSG101	LRSAM1	-	-	-
PPI	BVRF1	EFEMP2	CATSPER1	-	-	-
PPI	BVRF1	ACTN1	XRCC4	-	-	-
PPI	BVRF1	EFEMP2	SGTB	-	-	-
PPI	BVRF1	EFEMP1	SGTA	-	-	-
PPI	BVRF1	EFEMP2	LINGO1	-	-	-
PPI	BVRF1	TSG101	KRT15	-	-	-
PPI	BVRF1	EFEMP2	COL8A1	-	-	-
PPI	BVRF1	EFEMP2	BAT3	-	-	-
PPI	BVRF1	PSME3	FXR2	-	-	-
PPI	BVRF1	EFEMP2	RHOXF2	-	-	-
PPI	BVRF1	EFEMP2	FAM124B	-	-	-
PPI	BVRF1	EFEMP2	CCNK	-	-	-
PPI	BVRF1	EFEMP2	CCND3	-	-	-
PPI	BVRF1	EFEMP2	HHEX	-	-	-
PPI	BVRF1	EFEMP2	PLSCR1	-	-	-
PPI	BVRF1	ACTN1	MAGEA11	-	-	-
PPI	BVRF1	ACTN1	MYOZ1	-	-	-
PPI	BVRF1	PSME3	NUDT18	-	-	-
PPI	BZLF2	GRN	HOXA1	601536-142955	758	Athabaskan brainstem dysgenesis syndrome, 601536 (3)
PPI	EBNA1	MDFI	ZNF101	-	-	-
PPI	EBNA1	MDFI	CATSPER1	-	-	-
PPI	EBNA1	MDFI	SLC35A2	237900-191740	782.4	Hyperbilirubinemia, familial transcient neonatal, 237900 (3)
PPI	EBNA1	MDFI	TRAF3IP2	-	-	-
PPI	EBNA1	MDFI	CRX	268000-602225	362.74	Retinitis pigmentosa, late-onset dominant, 268000 (3)
PPI	EBNA1	MDFI	ZBTB25	-	-	-
PPI	EBNA1	MDFI	C18orf56	-	-	-
PPI	EBNA1	MDFI	ZNF707	-	-	-
PPI	EBNA1	MDFI	AASDHPPT	-	-	-
PPI	EBNA1	MDFI	CRX	304020-312610	362.75	Cone dystrophy-1, 304020 (3)
PPI	EBNA1	MDFI	CRY1	-	-	-
PPI	EBNA1	MDFI	ZNF607	-	-	-
PPI	EBNA1	MDFI	ZNF679	-	-	-
PPI	EBNA1	MDFI	ZNF439	-	-	-
PPI	EBNA1	MDFI	DHRS1	-	-	-
PPI	EBNA1	MDFI	OTX1	-	-	-
PPI	EBNA1	MDFI	PVRL2	-	-	-
PPI	EBNA1	TSG101	PPFIBP2	-	-	-
PPI	EBNA1	MDFI	SIX1	605192-601205	-	Deafness, autosomal dominant 23, 605192 (3)
PPI	EBNA1	MDFI	KIAA0408	-	-	-
PPI	EBNA1	MDFI	SLC9A1	-	-	-
PPI	EBNA1	MDFI	GPRIN2	-	-	-
PPI	EBNA1	MDFI	EWSR1	L997-133450	170.9	Ewing sarcoma (3)
PPI	EBNA1	MDFI	MDFI	-	-	-
PPI	EBNA1	MDFI	CRX	300389-312610	362.74	Retinitis pigmentosa-3, 300389 (3)
PPI	EBNA1	MDFI	CBFA2T2	-	-	-
PPI	EBNA1	MDFI	EWSR1	L538-133450	170.9	Chondrosarcoma, extraskeletal myxoid (3)
PPI	EBNA1	MDFI	GNAI2	L2148-139360	258	Pituitary ACTH-secreting adenoma (3)
PPI	EBNA1	MDFI	CRX	L1629-312610	362.5	Macular degeneration, X-linked atrophic (3)
PPI	EBNA1	MDFI	BAALC	-	-	-
PPI	EBNA1	MDFI	EWSR1	612219-133450	-	Neuroepithelioma, 612219 (3)
PPI	EBNA1	MDFI	SFRS17A	-	-	-
PPI	EBNA1	MDFI	EBI3	-	-	-
PPI	EBNA1	TSG101	LRSAM1	-	-	-
PPI	EBNA1	MDFI	C12orf12	-	-	-
PPI	EBNA1	MDFI	CRX	204000-602225	362.76	Leber congenital amaurosis, 204000 (3)
PPI	EBNA1	MDFI	SLC35A2	218800-191740	277.4	Crigler-Najjar syndrome, type I, 218800 (3)
PPI	EBNA1	MDFI	VPS72	-	-	-
PPI	EBNA1	TSG101	KRT15	-	-	-
PPI	EBNA1	MDFI	ZNF764	-	-	-
PPI	EBNA1	MDFI	C6orf165	-	-	-
PPI	EBNA1	MDFI	WDYHV1	-	-	-
PPI	EBNA1	MDFI	TAP1	604571-170260	279.2	Bare lymphocyte syndrome, type I, 604571 (3)
PPI	EBNA1	MDFI	ZNF426	-	-	-
PPI	EBNA1	MDFI	FBXW5	-	-	-
PPI	EBNA1	MDFI	CRX	300455-312610	362.74	Retinitis pigmentosa, X-linked, with recurrent respiratory infections, 300455 (3)
PPI	EBNA1	MDFI	BAHD1	-	-	-
PPI	EBNA1	MDFI	SLC35A2	143500-191740	277.4	Gilbert syndrome, 143500 (3)
PPI	EBNA1	MDFI	NPDC1	-	-	-
PPI	EBNA1	MDFI	LRDD	-	-	-
PPI	EBNA1	TSG101	HGS	-	-	-
PPI	EBNA1	MDFI	ILF3	-	-	-
PPI	EBNA1	MDFI	CRX	120970-602225	362.75	Cone-rod retinal dystrophy-2, 120970 (3)
PPI	EBNA1	MDFI	ZNF559	-	-	-
PPI	EBNA1	MDFI	ZNF581	-	-	-
PPI	EBNA1	MDFI	CRX	L3257-312610	362.5	Macular degeneration, X-linked atrophic (3)
PPI	EBNA1	MDFI	SIX1	-	-	-
PPI	EBNA1	MDFI	ATG12	-	-	-
PPI	EBNA1	MDFI	THAP7	-	-	-
PPI	EBNA1	MDFI	LMO3	-	-	-
PPI	EBNA1	MDFI	HOXA1	601536-142955	758	Athabaskan brainstem dysgenesis syndrome, 601536 (3)
PPI	EBNA1	MDFI	SIX1	608389-601205	-	Brachiootic syndrome 3, 608389 (3)
PPI	EBNA1	MDFI	DNPEP	-	-	-
PPI	EBNA1	MDFI	TINAGL1	-	-	-
PPI	EBNA1	MDFI	CRX	300029-312610	362.75	Cone-rod dystrophy, 300029 (3)
PPI	EBNA1	MDFI	ZNF205	-	-	-
PPI	EBNA1	MDFI	CPSF3L	-	-	-
PPI	EBNA1	MDFI	GNAI2	192605-139360	427.1	Ventricular tachycardia, idiopathic, 192605 (3)
PPI	EBNA1	MDFI	MCM5	-	-	-
PPI	EBNA1	MDFI	ZNF440	-	-	-
PPI	EBNA1	MDFI	ZNF417	-	-	-
PPI	EBNA1	TSG101	CEP55	-	-	-
PPI	EBNA1	MDFI	C1orf65	-	-	-
PPI	EBNA1	MDFI	PIN1	-	-	-
PPI	EBNA1	MDFI	SLC35A2	606785-191740	277.4	Crigler-Najjar syndrome, type II, 606785 (3)
PPI	EBNA1	MDFI	DUSP6	-	-	-
PPI	EBNA1	MDFI	DDX19A	-	-	-
PPI	EBNA1	MDFI	LRRN4	-	-	-
PPI	EBNA1	MDFI	FZD9	-	-	-
PPI	EBNA1	MDFI	MFSD3	-	-	-
PPI	EBNA1	MDFI	CHIC2	601626-604332	208.9	Leukemia, acute myeloid, 601626 (3)
PPI	EBNA2	EFEMP2	APEX2	-	-	-
PPI	EBNA2	EFEMP2	RHPN1	-	-	-
PPI	EBNA2	EFEMP2	GLRX3	-	-	-
PPI	EBNA2	EFEMP2	ZNF263	-	-	-
PPI	EBNA2	SRI	CALCOCO2	-	-	-
PPI	EBNA2	SRI	SRI	-	-	-
PPI	EBNA2	EFEMP2	CCNK	-	-	-
PPI	EBNA2	EFEMP2	SGTA	-	-	-
PPI	EBNA2	EFEMP2	ZNF638	-	-	-
PPI	EBNA2	EFEMP2	PLSCR4	-	-	-
PPI	EBNA2	EFEMP2	ZNF426	-	-	-
PPI	EBNA2	EFEMP2	FAM107A	-	-	-
PPI	EBNA2	EFEMP2	RHOXF2	-	-	-
PPI	EBNA2	EFEMP2	FAM124B	-	-	-
PPI	EBNA2	EFEMP2	COL8A1	-	-	-
PPI	EBNA2	EFEMP2	LRDD	-	-	-
PPI	EBNA2	EFEMP2	CCND3	-	-	-
PPI	EBNA2	EFEMP2	CATSPER1	-	-	-
PPI	EBNA2	EFEMP2	PLSCR1	-	-	-
PPI	EBNA2	EFEMP2	AQP1	L187-107776	281.4	Aquaporin-1 deficiency (3)
PPI	EBNA2	EFEMP2	AQP1	110450-107776	-	Blood group, Colton, 110450 (3)
PPI	EBNA2	EFEMP2	UBQLN1	-	-	-
PPI	EBNA2	EFEMP2	IL16	-	-	-
PPI	EBNA2	EFEMP2	SGTB	-	-	-
PPI	EBNA2	EFEMP2	AQP1	L3598-107776	281.4	Aquaporin-1 deficiency (3)
PPI	EBNA2	EFEMP2	BAT3	-	-	-
PPI	EBNA2	EFEMP2	LINGO1	-	-	-
PPI	EBNA2	EFEMP2	HOXA1	601536-142955	758	Athabaskan brainstem dysgenesis syndrome, 601536 (3)
PPI	EBNA2	EFEMP2	HHEX	-	-	-
PPI	EBNA4	ACTN1	MAGEA11	-	-	-
PPI	EBNA4	ACTN1	MYOZ1	-	-	-
PPI	EBNA4	ACTN1	XRCC4	-	-	-
PPI	EBNA4	ACTN4	MYOZ1	-	-	-
PPI	GB	AP2B1	AP2M1	-	-	-
PPI	GB	AP2B1	MEA1	-	-	-
PPI	GB	AP2B1	POM121	-	-	-
PPI	GB	AP2B1	DHX58	-	-	-
PPI	GB	AP2B1	TERF2IP	-	-	-
PPI	GB	AP2B1	FAM46C	-	-	-
PPI	GB	AP2B1	LDLRAP1	603813-605747	272	Hypercholesterolemia, familial, autosomal recessive, 603813 (3)
PPI	GB	GRN	HOXA1	601536-142955	758	Athabaskan brainstem dysgenesis syndrome, 601536 (3)
PPI	GB	AP2B1	NUP54	-	-	-
PPI	GB	TRAF2	TIFA	-	-	-
PPI	GB	AP2B1	NECAP2	-	-	-
PPI	GB	AP2B1	KIAA0408	-	-	-
PPI	GB	AP2B1	ATP6V1G1	-	-	-
PPI	GL	HOMER3	DYNLL2	-	-	-
PPI	GM	HOMER3	DYNLL2	-	-	-
PPI	GN	HOMER3	DYNLL2	-	-	-
PPI	SM	SP100	SUMO1	-	-	-
PPI	SM	SP100	SUMO1	L4836-601912	-	Orofacial cleft 10 (3)
PPI	TK	TSC22D4	UBLCP1	-	-	-
PPI	TK	TSC22D4	CCNK	-	-	-
PPI	TK	TSC22D4	GORASP2	-	-	-
PPI	TK	TSC22D4	PIH1D1	-	-	-
PPI	TK	TSC22D4	NOC4L	-	-	-
PPI	TK	TSC22D4	CDC23	-	-	-
PPI	TK	TSC22D4	NIF3L1	-	-	-
PPI	TK	TSC22D4	MAD2L1	-	-	-
PPI	TK	TSC22D4	PIN1	-	-	-
PPI	TK	TSC22D4	CKS2	-	-	-
PPI	TK	TSC22D4	LNX1	-	-	-
PPI	TK	TSC22D4	FRMD6	-	-	-
PPI	TK	TSC22D4	CCDC42	-	-	-
PPI	TK	TSC22D4	ZMYND10	-	-	-
PPI	TK	TSC22D4	ABLIM1	-	-	-
PPI	TK	TSC22D4	TEX11	-	-	-
PPI	TK	TSC22D4	ZNF580	-	-	-
PPI	TK	TSC22D4	CDK5R1	-	-	-
PPI	TK	TSC22D4	GNB2L1	-	-	-
PPI	TK	TSC22D4	SYT17	-	-	-
PPI	TK	TSC22D4	CCDC33	-	-	-
PPI	BFLF2	PLSCR1	PGLS	-	-	-
PPI	BRRF1	PLSCR1	PGLS	-	-	-
PPI	BVRF1	NCKIPSD	DMRTB1	-	-	-
PPI	EBNA1	MDFI	PGLS	-	-	-
PPI	EBNA1	MDFI	C18orf45	-	-	-
PPI	BDLF2	PSME3	PSME3	-	-	-
PPI	BVRF1	PSME3	PSME3	-	-	-
PPI	GB	VIM	MYST2	-	-	-
PPI	BFLF2	TXNDC11	KRT15	-	-	-
PPI	EBNA1	MDFI	LRCH4	-	-	-
PPI	EBNA1	MDFI	C10orf62	-	-	-
PPI	EBNA1	MDFI	C9orf86	-	-	-
PPI	EBNA1	MDFI	CCDC120	-	-	-
PPI	BGRF1/BDRF1	TSC22D4	2010-06-01	308800-313020	-	Keratosis follicularis spinulosa decalvans, 308800 (3)
PPI	BGRF1/BDRF1	TSC22D4	NRBP1	-	-	-
PPI	BGRF1/BDRF1	TSC22D4	FXR2	-	-	-
PPI	BGRF1/BDRF1	TSC22D4	PSMA1	-	-	-
PPI	BGRF1/BDRF1	TSC22D4	2010-06-01	-	-	-
PPI	BVRF1	TSG101	VPS28	-	-	-
PPI	BVRF1	NCKIPSD	NCK2	-	-	-
PPI	EBNA1	MDFI	CNNM3	-	-	-
PPI	EBNA1	TSG101	VPS28	-	-	-
PPI	EBNA1	MDFI	ZNF136	-	-	-
PPI	EBNA1	MDFI	ZNF408	-	-	-
PPI	EBNA1	MDFI	CBX2	-	-	-
PPI	EBNA1	MDFI	C8orf48	-	-	-
PPI	EBNA1	MDFI	FASTK	-	-	-
PPI	EBNA1	MDFI	AQP1	L187-107776	281.4	Aquaporin-1 deficiency (3)
PPI	EBNA1	MDFI	DKK1	-	-	-
PPI	EBNA1	MDFI	LASP1	-	-	-
PPI	EBNA1	MDFI	THEG	-	-	-
PPI	EBNA1	MDFI	TRPV6	-	-	-
PPI	EBNA1	MDFI	KIAA0415	-	-	-
PPI	EBNA1	MDFI	C19orf60	-	-	-
PPI	EBNA1	MDFI	AQP1	110450-107776	-	Blood group, Colton, 110450 (3)
PPI	EBNA1	MDFI	WDR42A	-	-	-
PPI	EBNA1	MDFI	SPG7	607259-602783	94	Spastic paraplegia-7, 607259 (3)
PPI	EBNA1	MDFI	ZNF646	-	-	-
PPI	EBNA1	MDFI	AQP5	-	-	-
PPI	EBNA1	MDFI	NR1H2	-	-	-
PPI	EBNA1	MDFI	HOXB9	-	-	-
PPI	EBNA1	MDFI	ZBTB24	-	-	-
PPI	EBNA1	MDFI	AQP1	L3598-107776	281.4	Aquaporin-1 deficiency (3)
PPI	EBNA1	MDFI	PHLDA1	-	-	-
PPI	EBNA1	MDFI	FAM124B	-	-	-
PPI	EBNA4	ACTN4	MYOZ2	-	-	-
PPI	EBNA4	ACTN4	PDLIM1	-	-	-
PPI	GB	AP2B1	AP1M1	-	-	-
PPI	GB	AP2B1	THAP1	L4329-602629	-	Dystonia-6, torsion (2)
PPI	GB	AP2B1	MLH1	114030-120436	709.09	Cafe-au-lait spots with glioma or leukemia, 114030 (3)
PPI	GB	AP2B1	MLH1	609310-120436	153	Colorectal cancer, hereditary nonpolyposis, type 2, 609310 (3)
PPI	GB	AP2B1	MLH1	276300-120436	211.3	Turcot syndrome with glioblastoma, 276300 (3)
PPI	GB	AP2B1	AP1M2	-	-	-
PPI	GB	AP2B1	MLH1	158320-120436	706.2	Muir-Torre syndrome, 158320 (3)
PPI	GB	AP2B1	TUBGCP4	-	-	-
PPI	GB	AP2B1	THAP1	-	-	-
PPI	TK	TSC22D4	NRBP1	-	-	-
PPI	TK	TSC22D4	FXR2	-	-	-
PPI	TK	TSC22D4	PSMA1	-	-	-
PPI	TK	TSC22D4	2010-06-01	308800-313020	-	Keratosis follicularis spinulosa decalvans, 308800 (3)
PPI	TK	TSC22D4	2010-06-01	-	-	-
PPI	EBNA1	MDFI	IQUB	-	-	-
PPI	BBRF2	ARHGEF10L	C1orf113	-	-	-
PPI	BFLF2	BAT3	NOMO1	-	-	-
PPI	BFLF2	DKK3	IGLON5	-	-	-
PPI	BFRF1	PRMT1	HABP4	-	-	-
PPI	BGLF2	TUBA1A	ACTN2	-	-	-
PPI	BGLF2	TUBA1A	MAGED1	-	-	-
PPI	BGLF2	TUBA1A	ENO2	-	-	-
PPI	BGLF2	TUBA1A	RBM23	-	-	-
PPI	BGLF2	TUBA1A	GNAI2	L2148-139360	258	Pituitary ACTH-secreting adenoma (3)
PPI	BGLF2	TUBA1A	GNAI2	192605-139360	427.1	Ventricular tachycardia, idiopathic, 192605 (3)
PPI	BGLF2	TUBA1A	C5orf25	-	-	-
PPI	BGLF2	TUBA1A	S100A8	117800-607040	-	Earwax, wet/dry, 117800 (3)
PPI	BGLF2	TUBA1A	S100A8	-	-	-
PPI	BGLF2	TUBA1A	C4orf17	-	-	-
PPI	BGLF2	TUBA1A	ACTN2	612158-102573	-	Cardiomyopathy, dilated, 1AA, 612158 (3)
PPI	BGLF2	TUBA1A	TM4SF1	-	-	-
PPI	BGLF2	TUBA1A	RPL12	-	-	-
PPI	BGLF2	TUBA1A	BCAR1	-	-	-
PPI	BGRF1/BDRF1	GPRASP2	C8orf33	-	-	-
PPI	BGRF1/BDRF1	GPRASP2	TFG	-	-	-
PPI	BGRF1/BDRF1	GPRASP2	TFG	612237-602498	-	Chondrosarcoma, extraskeletal myxoid, 612237 (1)
PPI	BGRF1/BDRF1	GPRASP2	GLYAT	-	-	-
PPI	BGRF1/BDRF1	GPRASP2	SMPD3	-	-	-
PPI	BGRF1/BDRF1	GPRASP2	HMOX2	-	-	-
PPI	BGRF1/BDRF1	GPRASP2	TAC3	-	-	-
PPI	BGRF1/BDRF1	GPRASP2	C8orf30A	-	-	-
PPI	BGRF1/BDRF1	GPRASP2	MAP7D1	-	-	-
PPI	BGRF1/BDRF1	GPRASP2	STMN2	-	-	-
PPI	BGRF1/BDRF1	GPRASP2	PFDN1	-	-	-
PPI	BGRF1/BDRF1	GPRASP2	MTF2	-	-	-
PPI	BGRF1/BDRF1	GPRASP2	PBK	-	-	-
PPI	BGRF1/BDRF1	GPRASP2	OFD1	311200-300170	351.8	Oral-facial-digital syndrome 1, 311200 (3)
PPI	BGRF1/BDRF1	GPRASP2	CRIP1	-	-	-
PPI	BGRF1/BDRF1	GPRASP2	OFD1	L3511-300209	733.99	Simpson-Golabi-Behmel syndrome, type 2 (2)
PPI	BGRF1/BDRF1	GPRASP2	SNAPIN	-	-	-
PPI	BGRF1/BDRF1	GPRASP2	OFD1	300209-300170	-	Simpson-Golabi-Behmel syndrome, type 2, 300209 (3)
PPI	BGRF1/BDRF1	GPRASP2	HBXIP	-	-	-
PPI	BPLF1	HBB	HBA1	L1174-141800	282.7	Heinz body anemias, alpha- (3)
PPI	BPLF1	HBB	HBA1	L984-141800	207	Erythremias, alpha- (3)
PPI	BPLF1	HBB	HBA1	L2567-141800	282.49	Thalassemias, alpha- (3)
PPI	BPLF1	HBB	HBA1	L3126-141800	282.7	Heinz body anemias, alpha- (3)
PPI	BPLF1	HBB	HBA1	L3327-141800	289.7	Methemoglobinemias, alpha- (3)
PPI	BPLF1	HBB	HBA1	L3548-141800	282.49	Thalassemias, alpha- (3)
PPI	BPLF1	HLA-B	PPP1R16A	-	-	-
PPI	BPLF1	HBB	HBA1	L1733-141800	289.7	Methemoglobinemias, alpha- (3)
PPI	BPLF1	HBB	HBA1	L3067-141800	207	Erythremias, alpha- (3)
PPI	BVRF1	IMMT	CHD3	-	-	-
PPI	GB	VIM	HABP4	-	-	-
PPI	GB	VIM	ATN1	125370-607462	345.1	Dentatorubro-pallidoluysian atrophy, 125370 (3)
PPI	GB	VIM	C1orf103	-	-	-
PPI	GB	VIM	SLC27A6	-	-	-
PPI	TK	GPRASP2	C8orf33	-	-	-
PPI	TK	GPRASP2	OFD1	300209-300170	-	Simpson-Golabi-Behmel syndrome, type 2, 300209 (3)
PPI	TK	GPRASP2	SMPD3	-	-	-
PPI	TK	GPRASP2	MAP7D1	-	-	-
PPI	TK	GPRASP2	MTF2	-	-	-
PPI	TK	GPRASP2	HBXIP	-	-	-
PPI	TK	GPRASP2	GLYAT	-	-	-
PPI	TK	GPRASP2	HMOX2	-	-	-
PPI	TK	GPRASP2	C8orf30A	-	-	-
PPI	TK	GPRASP2	SNAPIN	-	-	-
PPI	TK	GPRASP2	CRIP1	-	-	-
PPI	TK	GPRASP2	OFD1	L3511-300209	733.99	Simpson-Golabi-Behmel syndrome, type 2 (2)
PPI	TK	GPRASP2	OFD1	311200-300170	351.8	Oral-facial-digital syndrome 1, 311200 (3)
PPI	TK	GPRASP2	STMN2	-	-	-
PPI	TK	GPRASP2	TFG	612237-602498	-	Chondrosarcoma, extraskeletal myxoid, 612237 (1)
PPI	TK	GPRASP2	TAC3	-	-	-
PPI	TK	GPRASP2	TFG	-	-	-
PPI	TK	GPRASP2	PBK	-	-	-
PPI	TK	GPRASP2	PFDN1	-	-	-
PPI	BARF1	TMEM66	RIBC2	-	-	-
PPI	BBRF2	ARHGEF10L	SCN2A	607745-182390	780.39	Seizures, benign familial neonatal-infantile, 607745 (3)
PPI	BBRF2	ARHGEF10L	SCN2A	604233-182390	780.39	Seizures, afebrile, 604233 (3)
PPI	BBRF2	ARHGEF10L	DRAP1	-	-	-
PPI	BBRF2	ARHGEF10L	NR4A1	-	-	-
PPI	BBRF2	ARHGEF10L	ANXA9	-	-	-
PPI	BFLF2	BAT3	FAM173A	-	-	-
PPI	BFLF2	BAT3	IKBKAP	223900-603722	337.9	Dysautonomia, familial, 223900 (3)
PPI	BFRF1	PRMT1	YLPM1	-	-	-
PPI	BPLF1	HBB	SELT	-	-	-
PPI	BPLF1	CLK1	GOLM1	-	-	-
PPI	BVRF1	IMMT	AKTIP	-	-	-
PPI	BVRF1	IMMT	ECSIT	-	-	-
PPI	BVRF1	IMMT	CCDC113	-	-	-
PPI	BVRF1	IMMT	C10orf88	-	-	-
PPI	BVRF1	IMMT	FAM173A	-	-	-
PPI	EBNA1	MDFI	PTCHD2	-	-	-
PPI	EBNA2	DYNLL1	EEF1A1	-	-	-
PPI	EBNA3	NR4A1	ARHGEF10L	-	-	-
PPI	GB	VIM	DPPA4	-	-	-
PPI	GB	VIM	HMG20B	-	-	-
PPI	GB	VIM	TTR	L3631-176300	242.9	Dystransthyretinemic hyperthyroxinemia(3)
PPI	GB	VIM	BRD1	-	-	-
PPI	GB	VIM	SUMO3	-	-	-
PPI	GB	VIM	SLC25A6	-	-	-
PPI	GB	VIM	RAD51	114480-179617	239.3	Breast cancer, susceptibility to, 114480 (3)
PPI	GB	VIM	CASP8	114480-601763	239.3	Breast cancer, protection against, 114480 (3)
PPI	GB	VIM	SYN1	300491-313440	345.9	Epilepsy, X-linked, with variable learning disabilities and behavior disorders, 300491 (3)
PPI	GB	VIM	XRCC4	-	-	-
PPI	GB	VIM	MAN2A2	-	-	-
PPI	GB	VIM	CASP8	211980-601763	162.9	Lung cancer, protection against, 211980 (3)
PPI	GB	VIM	SDCCAG3	-	-	-
PPI	GB	VIM	DIS3L2	-	-	-
PPI	GB	VIM	TTR	L432-176300	354	Carpal tunnel syndrome, familial (3)
PPI	GB	VIM	C7orf36	-	-	-
PPI	GB	VIM	IVNS1ABP	-	-	-
PPI	GB	VIM	SRRT	-	-	-
PPI	GB	VIM	PSME1	-	-	-
PPI	GB	VIM	TTR	L2766-176300	277.39	Amyloid neuropathy, familial, several allelic types (3)
PPI	GB	VIM	TRIOBP	-	-	-
PPI	GB	VIM	TRIM28	-	-	-
PPI	GB	VIM	CASP8	607271-601763	279.4	Autoimmune lymphoproliferative syndrome, type IIB, 607271 (3)
PPI	GB	VIM	TNFRSF14	-	-	-
PPI	GB	VIM	STX1A	-	-	-
PPI	GB	VIM	SIRT6	-	-	-
PPI	GB	VIM	CASP8	114550-601763	211.5	Hepatocellular carcinoma, somatic, 114550 (3)
PPI	GB	VIM	FUBP1	-	-	-
PPI	GB	VIM	LOR	602036-152445	270.2	Erythrokeratoderma, progressive symmetric, 602036 (3)
PPI	GB	VIM	PUF60	-	-	-
PPI	GB	VIM	CREB1	-	-	-
PPI	GB	VIM	TTR	L136-176300	277.39	Amyloidosis, senile systemic (3)
PPI	GB	VIM	NFATC2	-	-	-
PPI	GB	VIM	MAFG	-	-	-
PPI	GB	VIM	CRCT1	-	-	-
PPI	GB	VIM	FABP4	-	-	-
PPI	GB	VIM	MRPL44	-	-	-
PPI	GB	VIM	SUMO2	-	-	-
PPI	GB	VIM	RABAC1	-	-	-
PPI	GB	VIM	LOR	604117-152445	782.8	Vohwinkel syndrome with ichthyosis, 604117 (3)
PPI	GB	VIM	CREB1	612160-123810	-	Histiocytoma, angiomatoid fibrous, somatic, 612160 (3)
PPI	GB	VIM	TTR	L130-176300	277.39	Amyloid neuropathy, familial, several allelic types (3)
PPI	GB	VIM	TTR	L2867-176300	354	Carpal tunnel syndrome, familial (3)
PPI	GB	VIM	KIF15	-	-	-
PPI	GB	VIM	SH3YL1	-	-	-
PPI	GB	VIM	TRIOBP	609823-609761	-	Deafness, autosomal recessive 28, 609823 (3)
PPI	GB	VIM	TTR	L2768-176300	277.39	Amyloidosis, senile systemic (3)
PPI	GB	VIM	TTR	L870-176300	242.9	Dystransthyretinemic hyperthyroxinemia(3)
PPI	GB	VIM	SERBP1	-	-	-
PPI	GB	VIM	BHLHE40	-	-	-
PPI	BARF1	TMEM66	SNX15	-	-	-
PPI	BARF1	PKM2	OLFM2	-	-	-
PPI	BARF1	TMEM66	2010-06-01	-	-	-
PPI	BARF1	TMEM66	2010-06-01	308800-313020	-	Keratosis follicularis spinulosa decalvans, 308800 (3)
PPI	BARF1	TMEM66	ABCD4	-	-	-
PPI	BARF1	TMEM66	IFIT5	-	-	-
PPI	BDLF2	PSME3	ATP5B	-	-	-
PPI	BDLF2	PSME3	ADAP1	-	-	-
PPI	BDLF2	PSME3	HSPA5	-	-	-
PPI	BFLF2	BAT3	SMN1	253400-600354	335.1	Spinal muscular atrophy-3, 253400 (3)
PPI	BFLF2	BAT3	CHN2	-	-	-
PPI	BFLF2	BAT3	FKBP2	-	-	-
PPI	BFLF2	BAT3	SMN1	271150-600354	335.1	Spinal muscular atrophy-4, 271150 (3)
PPI	BFLF2	BAT3	TAC1	-	-	-
PPI	BFLF2	BAT3	IGFBP5	-	-	-
PPI	BFLF2	BAT3	B2M	-	-	-
PPI	BFLF2	BAT3	DNAJB11	-	-	-
PPI	BFLF2	BAT3	DPT	-	-	-
PPI	BFLF2	BAT3	PELP1	-	-	-
PPI	BFLF2	BAT3	STX5	-	-	-
PPI	BFLF2	BAT3	EDN1	L3641-131240	286.9	High density lipoprotein cholesterol level QTL 7 (3)
PPI	BFLF2	BAT3	PPAP2C	-	-	-
PPI	BFLF2	BAT3	PRNP	603218-176640	333.4	Huntington disease-like 1, 603218 (3)
PPI	BFLF2	BAT3	PCTK1	-	-	-
PPI	BFLF2	BAT3	C19orf10	-	-	-
PPI	BFLF2	BAT3	RCN2	-	-	-
PPI	BFLF2	BAT3	PTH	L1368-168450	252.1	Hypoparathyroidism, autosomal dominant(3)
PPI	BFLF2	BAT3	PRNP	137440-176640	784.69	Gerstmann-Straussler disease, 137440 (3)
PPI	BFLF2	BAT3	CTSB	-	-	-
PPI	BFLF2	BAT3	PTH	146200-168450	252.1	Hypoparathyroidism, autosomal dominant, 146200 (3)
PPI	BFLF2	BAT3	PRG2	-	-	-
PPI	BFLF2	BAT3	SETDB1	-	-	-
PPI	BFLF2	BAT3	B2M	241600-109700	-	Hypoproteinemia, hypercatabolic, 241600 (3)
PPI	BFLF2	UBE2I	UNC119	-	-	-
PPI	BFLF2	BAT3	S100A4	-	-	-
PPI	BFLF2	BAT3	SMN1	253300-600354	335.1	Spinal muscular atrophy-1, 253300 (3)
PPI	BFLF2	BAT3	IMMT	-	-	-
PPI	BFLF2	BAT3	CSTF2	-	-	-
PPI	BFLF2	BAT3	SMN1	253550-600354	335.1	Spinal muscular atrophy-2, 253550 (3)
PPI	BFLF2	BAT3	REG1B	-	-	-
PPI	BFLF2	BAT3	PRNP	606688-176640	46.1	Prion disease with protracted course, 606688 (3)
PPI	BFLF2	BAT3	NDUFA6	-	-	-
PPI	BFLF2	BAT3	GLRA2	-	-	-
PPI	BFLF2	BAT3	TDGF1	L3091-187395	742.2	Forebrain defects (3)
PPI	BFLF2	BAT3	ARPC3	-	-	-
PPI	BFLF2	BAT3	TOMM20	-	-	-
PPI	BFLF2	BAT3	PRNP	600072-176640	780.52	Insomnia, fatal familial, 600072 (3)
PPI	BFLF2	BAT3	PRNP	123400-176640	46.1	Creutzfeldt-Jakob disease, 123400 (3)
PPI	BFLF2	BAT3	TDGF1	L1043-187395	742.2	Forebrain defects (3)
PPI	BFLF2	BAT3	IQCG	-	-	-
PPI	BFLF2	BAT3	CDK4	L1678-123829	172.9	Melanoma (3)
PPI	BFLF2	BAT3	PTH	L1369-168450	252.1	Hypoparathyroidism, autosomal recessive (3)
PPI	BFLF2	BAT3	CTSE	-	-	-
PPI	BFLF2	BAT3	RAB8A	-	-	-
PPI	BFRF1	PRMT1	HNRNPR	-	-	-
PPI	BFRF1	PRMT1	MED31	-	-	-
PPI	BFRF1	PRMT1	IDH3B	-	-	-
PPI	BFRF1	PRMT1	ARPC3	-	-	-
PPI	BFRF1	PRMT1	IGSF21	-	-	-
PPI	BFRF1	PRMT1	S100A8	-	-	-
PPI	BFRF1	PRMT1	PRMT1	-	-	-
PPI	BFRF1	PRMT1	S100A8	117800-607040	-	Earwax, wet/dry, 117800 (3)
PPI	BFRF1	PRMT1	FUS	-	-	-
PPI	BFRF1	PRMT1	NOL4	-	-	-
PPI	BFRF1	PRMT1	WDR33	-	-	-
PPI	BOLF1	PSMA3	PSMA6	L5447-602855	-	Myocardial infarcation, susceptibility to (3)
PPI	BOLF1	PSMA3	SNRPB	-	-	-
PPI	BOLF1	PSMA3	SNRPF	-	-	-
PPI	BOLF1	PSMA3	PSMA6	-	-	-
PPI	BOLF1	PSMA3	STX11	-	-	-
PPI	BOLF1	PSMA3	STX11	603552-605014	-	Hemophagocytic lymphohistiocytosis, familial, 4, 603552 (3)
PPI	BPLF1	GAPDH	HBXIP	-	-	-
PPI	BPLF1	GAPDH	RPA2	-	-	-
PPI	BPLF1	GAPDH	BTBD2	-	-	-
PPI	BPLF1	GAPDH	ARL15	-	-	-
PPI	BPLF1	GAPDH	PSMD11	-	-	-
PPI	BPLF1	GAPDH	LAMA4	-	-	-
PPI	BPLF1	GAPDH	PAFAH1B3	-	-	-
PPI	BPLF1	GAPDH	SERPINB9	-	-	-
PPI	BPLF1	GAPDH	PRDX1	-	-	-
PPI	BPLF1	GAPDH	TK1	-	-	-
PPI	BPLF1	GAPDH	PCDHA4	-	-	-
PPI	BRRF1	SNX4	AGK	-	-	-
PPI	BVRF1	IMMT	SRRT	-	-	-
PPI	BVRF1	IMMT	CCT5	256840-610150	-	Neuropathy, hereditary sensory, with spastic paraplegia, 256840 (3)
PPI	BVRF1	IMMT	ASCC2	-	-	-
PPI	BVRF1	IMMT	NDUFB9	-	-	-
PPI	BVRF1	PSMA3	PSMA6	L5447-602855	-	Myocardial infarcation, susceptibility to (3)
PPI	BVRF1	IMMT	CSTF2	-	-	-
PPI	BVRF1	PSMA3	STX11	-	-	-
PPI	BVRF1	IMMT	C11orf79	-	-	-
PPI	BVRF1	PSME3	ATP5B	-	-	-
PPI	BVRF1	PKM2	OLFM2	-	-	-
PPI	BVRF1	PSMA3	STX11	603552-605014	-	Hemophagocytic lymphohistiocytosis, familial, 4, 603552 (3)
PPI	BVRF1	IMMT	HJURP	-	-	-
PPI	BVRF1	IMMT	MRPL44	-	-	-
PPI	BVRF1	IMMT	PLA2G15	-	-	-
PPI	BVRF1	PSMA3	PSMA6	-	-	-
PPI	BVRF1	IMMT	KIF22	-	-	-
PPI	BVRF1	IMMT	PPOX	176200-600923	277.1	Porphyria variegata, 176200 (3)
PPI	BVRF1	PSMA3	SNRPB	-	-	-
PPI	BVRF1	IMMT	NIPSNAP3A	-	-	-
PPI	BVRF1	IMMT	BMI1	-	-	-
PPI	BVRF1	PSME3	HSPA5	-	-	-
PPI	BVRF1	IMMT	RER1	-	-	-
PPI	BVRF1	IMMT	TXNDC9	-	-	-
PPI	BVRF1	IMMT	CCT5	-	-	-
PPI	BVRF1	IMMT	STMN4	-	-	-
PPI	BVRF1	IMMT	ARMCX3	-	-	-
PPI	BVRF1	PSMA3	SNRPF	-	-	-
PPI	BVRF1	PSME3	ADAP1	-	-	-
PPI	BVRF1	IMMT	BAT3	-	-	-
PPI	BVRF1	IMMT	KDM1	-	-	-
PPI	BVRF1	IMMT	SNAPIN	-	-	-
PPI	BVRF1	IMMT	PFDN1	-	-	-
PPI	BVRF1	IMMT	STX5	-	-	-
PPI	EBNA2	DYNLL1	NDUFA4L2	-	-	-
PPI	EBNA2	PSMA3	SNRPB	-	-	-
PPI	EBNA2	PSMA3	STX11	-	-	-
PPI	EBNA2	DYNLL1	RGS2	L3485-601499	743.44	Rieger syndrome, type 2 (2)
PPI	EBNA2	DYNLL1	THAP8	-	-	-
PPI	EBNA2	DYNLL1	ZHX1	-	-	-
PPI	EBNA2	PSMA3	PSMA6	L5447-602855	-	Myocardial infarcation, susceptibility to (3)
PPI	EBNA2	AES	SNCAIP	168600-603779	332	Parkinson disease, 168600 (3)
PPI	EBNA2	DYNLL1	DNAJB9	-	-	-
PPI	EBNA2	AES	CCL7	-	-	-
PPI	EBNA2	AES	SH3GL3	-	-	-
PPI	EBNA2	AES	MED31	-	-	-
PPI	EBNA2	PSMA3	STX11	603552-605014	-	Hemophagocytic lymphohistiocytosis, familial, 4, 603552 (3)
PPI	EBNA2	DYNLL1	DYNLL1	-	-	-
PPI	EBNA2	AES	RPL18A	-	-	-
PPI	EBNA2	DYNLL1	C14orf1	-	-	-
PPI	EBNA2	AES	GABARAP	-	-	-
PPI	EBNA2	PSMA3	PSMA6	-	-	-
PPI	EBNA2	PSMA3	SNRPF	-	-	-
PPI	EBNA3	NR4A1	RPS6KA6	-	-	-
PPI	EBNA3	NR4A1	FXYD3	-	-	-
PPI	EBNA6	PSMA3	SNRPB	-	-	-
PPI	EBNA6	PSMA3	PSMA6	L5447-602855	-	Myocardial infarcation, susceptibility to (3)
PPI	EBNA6	PSMA3	STX11	603552-605014	-	Hemophagocytic lymphohistiocytosis, familial, 4, 603552 (3)
PPI	EBNA6	PSMA3	PSMA6	-	-	-
PPI	EBNA6	PSMA3	STX11	-	-	-
PPI	EBNA6	PSMA3	SNRPF	-	-	-
PPI	EBNALP	PSMA3	STX11	603552-605014	-	Hemophagocytic lymphohistiocytosis, familial, 4, 603552 (3)
PPI	EBNALP	PSMA3	PSMA6	-	-	-
PPI	EBNALP	PSMA3	STX11	-	-	-
PPI	EBNALP	PSMA3	PSMA6	L5447-602855	-	Myocardial infarcation, susceptibility to (3)
PPI	EBNALP	PSMA3	SNRPB	-	-	-
PPI	EBNALP	PSMA3	SNRPF	-	-	-
PPI	GB	VIM	VIM	-	-	-
PPI	SM	TRA2B	IVNS1ABP	-	-	-
PPI	SM	TRA2B	LUM	-	-	-
PPI	BFRF1	PRMT1	C1orf103	-	-	-
PPI	BARF1	ACTN1	ACTG2	-	-	-
PPI	BDLF1	MAPK7	C10orf10	-	-	-
PPI	BDLF1	MAPK7	GPSM3	-	-	-
PPI	BDLF1	MAPK7	C10orf10	102530-606845	-	Globozoospermia, 102530 (1) ()
PPI	BDLF3	HOMER3	TRIM27	-	-	-
PPI	BFLF2	ACTN1	ACTG2	-	-	-
PPI	BFLF2	EGFL7	MDFI	-	-	-
PPI	BFLF2	HOMER3	TRIM27	-	-	-
PPI	BFLF2	EGFL7	APPBP2	-	-	-
PPI	BGLF2	HOMER3	TRIM27	-	-	-
PPI	BGRF1/BDRF1	TSC22D4	ZBTB25	-	-	-
PPI	BGRF1/BDRF1	TSC22D4	OXSR1	-	-	-
PPI	BHRF1	ACTN1	ACTG2	-	-	-
PPI	BILF1	HOMER3	TRIM27	-	-	-
PPI	BLLF1	HOMER3	TRIM27	-	-	-
PPI	BPLF1	GAPDH	PLEKHF2	-	-	-
PPI	BPLF1	GAPDH	NIF3L1	-	-	-
PPI	BRRF1	SH3GLB1	WIPI2	-	-	-
PPI	BRRF1	SH3GLB1	NDUFAF1	-	-	-
PPI	BRRF1	SH3GLB1	SMCR7	-	-	-
PPI	BRRF1	SH3GLB1	PBX3	-	-	-
PPI	BRRF1	SH3GLB1	SEPX1	-	-	-
PPI	BRRF1	SH3GLB1	SH3GLB2	-	-	-
PPI	BVRF1	ACTN1	ACTG2	-	-	-
PPI	BVRF1	NCKIPSD	CLUL1	-	-	-
PPI	EBNA1	MDFI	SRGN	-	-	-
PPI	EBNA1	MDFI	RHOXF2	-	-	-
PPI	EBNA1	MDFI	NR1H3	-	-	-
PPI	EBNA1	MDFI	CCDC148	-	-	-
PPI	EBNA1	MDFI	CHCHD3	-	-	-
PPI	EBNA1	MDFI	LENG8	-	-	-
PPI	EBNA1	MDFI	FBF1	-	-	-
PPI	EBNA1	MDFI	PSMD3	-	-	-
PPI	EBNA1	MDFI	EGFL7	-	-	-
PPI	EBNA1	MDFI	HOMER2	-	-	-
PPI	EBNA1	MDFI	C10orf10	-	-	-
PPI	EBNA1	MDFI	KIAA1609	-	-	-
PPI	EBNA1	MDFI	BRF1	-	-	-
PPI	EBNA1	MDFI	IPO13	-	-	-
PPI	EBNA1	MDFI	FXYD6	-	-	-
PPI	EBNA1	MDFI	PARP11	-	-	-
PPI	EBNA1	MDFI	ZNF266	-	-	-
PPI	EBNA1	MDFI	C17orf66	-	-	-
PPI	EBNA1	MDFI	C17orf62	-	-	-
PPI	EBNA1	MDFI	ZNF490	-	-	-
PPI	EBNA1	MDFI	ZNF100	-	-	-
PPI	EBNA1	MDFI	PLSCR4	-	-	-
PPI	EBNA1	MDFI	RASSF5	-	-	-
PPI	EBNA1	MDFI	TGIF1	605389-602630	-	Hypotrichosis simplex, contiguous gene syndrome with, 605389 (2)
PPI	EBNA1	MDFI	HEYL	-	-	-
PPI	EBNA1	MDFI	MRPL27	-	-	-
PPI	EBNA1	MDFI	SAP130	-	-	-
PPI	EBNA1	MDFI	TRIM41	-	-	-
PPI	EBNA1	MDFI	MUM1	-	-	-
PPI	EBNA1	MDFI	L3MBTL4	-	-	-
PPI	EBNA1	MDFI	MRPL40	-	-	-
PPI	EBNA1	MDFI	WDFY3	-	-	-
PPI	EBNA1	MDFI	KIAA1539	-	-	-
PPI	EBNA1	MDFI	IMP3	-	-	-
PPI	EBNA1	MDFI	HHLA3	-	-	-
PPI	EBNA1	MDFI	C1orf51	-	-	-
PPI	EBNA1	MDFI	C19orf34	-	-	-
PPI	EBNA1	MDFI	RPS4Y1	-	-	-
PPI	EBNA1	MDFI	C10orf10	102530-606845	-	Globozoospermia, 102530 (1) ()
PPI	EBNA1	MDFI	TGIF1	142946-602630	742.2	Holoprosencephaly-4, 142946 (3)
PPI	EBNA1	MDFI	FOS	-	-	-
PPI	EBNA1	MDFI	PCGF1	-	-	-
PPI	EBNA1	MDFI	EP400	-	-	-
PPI	EBNA1	MDFI	EXD3	-	-	-
PPI	EBNA1	MDFI	SEPX1	-	-	-
PPI	EBNA2	SH3GLB1	WIPI2	-	-	-
PPI	EBNA2	SH3GLB1	PBX3	-	-	-
PPI	EBNA2	SH3GLB1	SH3GLB2	-	-	-
PPI	EBNA2	SH3GLB1	SEPX1	-	-	-
PPI	EBNA2	SH3GLB1	NDUFAF1	-	-	-
PPI	EBNA2	SH3GLB1	SMCR7	-	-	-
PPI	EBNA4	ACTN1	ACTG2	-	-	-
PPI	EBNA4	SH3GLB1	SMCR7	-	-	-
PPI	EBNA4	SH3GLB1	SH3GLB2	-	-	-
PPI	EBNA4	SH3GLB1	WIPI2	-	-	-
PPI	EBNA4	SH3GLB1	NDUFAF1	-	-	-
PPI	EBNA4	SH3GLB1	PBX3	-	-	-
PPI	EBNA4	SH3GLB1	SEPX1	-	-	-
PPI	GB	AP2B1	C1QC	L368-120575	279.8	C1q deficiency, type C (3)
PPI	GB	AP2B1	C1QC	L2835-120575	279.8	C1q deficiency, type C (3)
PPI	GB	AP2B1	TFEC	-	-	-
PPI	GL	HOMER3	TRIM27	-	-	-
PPI	GM	HOMER3	TRIM27	-	-	-
PPI	GN	HOMER3	TRIM27	-	-	-
PPI	LMP1	EGFL7	MDFI	-	-	-
PPI	LMP1	EGFL7	APPBP2	-	-	-
PPI	TK	TSC22D4	OXSR1	-	-	-
PPI	TK	TSC22D4	ZBTB25	-	-	-
PPI	BDLF3	HOMER3	ABI3	-	-	-
PPI	BFLF2	HOMER3	ABI3	-	-	-
PPI	BGLF2	HOMER3	ABI3	-	-	-
PPI	BILF1	HOMER3	ABI3	-	-	-
PPI	BLLF1	HOMER3	ABI3	-	-	-
PPI	EBNA1	MDFI	NDUFA7	-	-	-
PPI	EBNA1	MDFI	NEU4	-	-	-
PPI	EBNA1	MDFI	CDC42EP1	-	-	-
PPI	EBNA1	MDFI	FBXL18	-	-	-
PPI	EBNA1	MDFI	DBF4B	-	-	-
PPI	EBNA1	MDFI	ETNK2	-	-	-
PPI	EBNA1	MDFI	PDGFB	L1089-190040	173.9	Giant-cell fibroblastoma (3)
PPI	EBNA1	MDFI	CYBA	233690-608508	288.1	Chronic granulomatous disease, autosomal, due to deficiency of CYBA, 233690 (3)
PPI	EBNA1	MDFI	PDGFB	L3275-190040	237.6	Meningioma, SIS-related (3)
PPI	EBNA1	MDFI	C5orf30	-	-	-
PPI	EBNA1	MDFI	SLC25A10	-	-	-
PPI	EBNA1	MDFI	PDGFB	L800-190040	173.9	Dermatofibrosarcoma protuberans (3)
PPI	EBNA1	MDFI	ZNF670	-	-	-
PPI	EBNA1	MDFI	C8orf33	-	-	-
PPI	EBNA1	MDFI	CLPB	-	-	-
PPI	EBNA1	MDFI	PBXIP1	-	-	-
PPI	EBNA1	MDFI	APLN	-	-	-
PPI	EBNA1	MDFI	TIE1	-	-	-
PPI	EBNA1	MDFI	EIF4E2	-	-	-
PPI	EBNA1	MDFI	FES	-	-	-
PPI	EBNA1	MDFI	PDGFB	L3011-190040	173.9	Dermatofibrosarcoma protuberans (3)
PPI	EBNA1	MDFI	PDGFB	L1692-190040	237.6	Meningioma, SIS-related (3)
PPI	EBNA1	MDFI	B3GNT9	-	-	-
PPI	EBNA1	MDFI	GDF15	-	-	-
PPI	EBNA1	MDFI	USP6	-	-	-
PPI	GL	HOMER3	ABI3	-	-	-
PPI	GM	HOMER3	ABI3	-	-	-
PPI	GN	HOMER3	ABI3	-	-	-
PPI	GB	LZTS2	NINL	-	-	-
PPI	GB	LZTS2	RBPMS	-	-	-
PPI	GB	LZTS2	PAK7	-	-	-
PPI	GB	LZTS2	RHOXF2	-	-	-
PPI	GB	LZTS2	TRAF2	-	-	-
PPI	GB	LZTS2	CCDC85B	-	-	-
PPI	GB	LZTS2	ZNF581	-	-	-
PPI	GB	LZTS2	TRIM29	-	-	-
PPI	BDLF1	CCDC14	MAGEA11	-	-	-
PPI	BFRF1	HOMER3	DYNLL2	-	-	-
PPI	BDLF2	PSMA3	STX11	-	-	-
PPI	BDLF2	PSMA3	SNRPB	-	-	-
PPI	BDLF2	PSMA3	PSMA6	-	-	-
PPI	BDLF2	PSMA3	STX11	603552-605014	-	Hemophagocytic lymphohistiocytosis, familial, 4, 603552 (3)
PPI	BDLF2	PSMA3	SNRPF	-	-	-
PPI	BDLF2	PSMA3	PSMA6	L5447-602855	-	Myocardial infarcation, susceptibility to (3)
PPI	EBNA4	PSMA3	PSMA6	L5447-602855	-	Myocardial infarcation, susceptibility to (3)
PPI	EBNA4	PSMA3	SNRPB	-	-	-
PPI	EBNA4	PSMA3	STX11	603552-605014	-	Hemophagocytic lymphohistiocytosis, familial, 4, 603552 (3)
PPI	EBNA4	PSMA3	SNRPF	-	-	-
PPI	EBNA4	PSMA3	STX11	-	-	-
PPI	EBNA4	PSMA3	PSMA6	-	-	-
PPI	BFRF1	HOMER3	TRIM27	-	-	-
PPI	BFRF1	HOMER3	ABI3	-	-	-
PPI	BFLF2	LZTS2	NINL	-	-	-
PPI	BSLF2;BMLF1	BEND7	LRRC68	-	-	-
PPI	BALF1	FHL3	RBM42	-	-	-
PPI	BALF1	CEP76	DCTD	-	-	-
PPI	BALF1	FHL3	RFX6	-	-	-
PPI	BALF1	FHL3	ADAMTSL4	-	-	-
PPI	BBRF2	CEP76	DCTD	-	-	-
PPI	BBRF2	MCM6	ING5	-	-	-
PPI	BDLF2	CEP76	DCTD	-	-	-
PPI	BFLF2	MDFI	RFX2	-	-	-
PPI	BFLF2	MDFI	SFI1	-	-	-
PPI	BFLF2	LZTS2	TRIM29	-	-	-
PPI	BFLF2	KIAA0774	RIBC2	-	-	-
PPI	BFLF2	LZTS2	RBPMS	-	-	-
PPI	BFLF2	LZTS2	TRAF2	-	-	-
PPI	BFLF2	MDFI	SERF2	-	-	-
PPI	BFLF2	MDFI	METT11D1	-	-	-
PPI	BFLF2	LZTS2	PAK7	-	-	-
PPI	BFLF2	LZTS2	CCDC85B	-	-	-
PPI	BFLF2	LZTS2	ZNF581	-	-	-
PPI	BFLF2	LZTS2	RHOXF2	-	-	-
PPI	BFLF2	MDFI	C16orf48	-	-	-
PPI	BFLF2	MDFI	CCDC116	-	-	-
PPI	BHRF1	FATE1	TRAF2	-	-	-
PPI	BHRF1	FATE1	USHBP1	-	-	-
PPI	BLRF2	DVL2	FAM105B	-	-	-
PPI	BLRF2	DVL2	TRAF2	-	-	-
PPI	BLRF2	DVL2	C16orf48	-	-	-
PPI	BNLF2A	UBE2I	NUDCD3	-	-	-
PPI	BNLF2A	UBE2I	PHC1	-	-	-
PPI	BNLF2A	UBE2I	DACH1	-	-	-
PPI	BPLF1	AP2B1	RIBC2	-	-	-
PPI	BSLF2;BMLF1	RBPMS	C9orf86	-	-	-
PPI	BSLF2;BMLF1	BEND7	NIF3L1	-	-	-
PPI	BSLF2;BMLF1	BEND7	PSMF1	-	-	-
PPI	BSLF2;BMLF1	BEND7	U2AF2	-	-	-
PPI	BSLF2;BMLF1	RBPMS	SMUG1	-	-	-
PPI	BSLF2;BMLF1	RBPMS	SERF2	-	-	-
PPI	BSLF2;BMLF1	UBE2I	NUDCD3	-	-	-
PPI	BSLF2;BMLF1	UBE2I	DACH1	-	-	-
PPI	BSLF2;BMLF1	RBPMS	LZTS2	-	-	-
PPI	BSLF2;BMLF1	UBE2I	PHC1	-	-	-
PPI	BSLF2;BMLF1	RBPMS	C1orf94	-	-	-
PPI	BSLF2;BMLF1	PSME3	SERF2	-	-	-
PPI	BSLF2;BMLF1	RBPMS	C16orf48	-	-	-
PPI	BSLF2;BMLF1	BEND7	SDCBP2	-	-	-
PPI	BSLF2;BMLF1	BEND7	EMD	310300-300384	756.55	Emery-Dreifuss muscular dystrophy, 310300 (3)
PPI	DUT	UBE2I	PHC1	-	-	-
PPI	DUT	UBE2I	DACH1	-	-	-
PPI	DUT	UBE2I	NUDCD3	-	-	-
PPI	EB1/BZLF1	C1orf94	MAPK1IP1L	-	-	-
PPI	EB1/BZLF1	RBPMS	SERF2	-	-	-
PPI	EB1/BZLF1	RBPMS	SMUG1	-	-	-
PPI	EB1/BZLF1	RBPMS	C1orf94	-	-	-
PPI	EB1/BZLF1	RBPMS	LZTS2	-	-	-
PPI	EB1/BZLF1	C1orf94	USO1	-	-	-
PPI	EB1/BZLF1	PEX5	SIRT3	-	-	-
PPI	EB1/BZLF1	PEX5	PDZK1	-	-	-
PPI	EB1/BZLF1	RBPMS	C16orf48	-	-	-
PPI	EB1/BZLF1	C1orf94	DAZAP2	-	-	-
PPI	EB1/BZLF1	RBPMS	C9orf86	-	-	-
PPI	EB1/BZLF1	C1orf94	RBPMS	-	-	-
PPI	EBNA1	LNX1	AKIRIN2	-	-	-
PPI	EBNA1	LNX1	TRAF2	-	-	-
PPI	EBNA1	LNX1	DCTD	-	-	-
PPI	EBNA3	RFX6	RFX3	-	-	-
PPI	EBNA3	RFX6	FHL3	608898-608897	288.4	Hemophagocytic lymphohistiocytosis, familial, 3, 608898 (3)
PPI	EBNA3	RFX6	LMO3	-	-	-
PPI	EBNA3	RFX6	RFX2	-	-	-
PPI	EBNA3	RFX6	CCNK	-	-	-
PPI	EBNA4	BANP	TRAF2	-	-	-
PPI	EBNA4	RBPMS	SERF2	-	-	-
PPI	EBNA4	RBPMS	C1orf94	-	-	-
PPI	EBNA4	RBPMS	SMUG1	-	-	-
PPI	EBNA4	RBPMS	LZTS2	-	-	-
PPI	EBNA4	RBPMS	C9orf86	-	-	-
PPI	EBNA4	RBPMS	C16orf48	-	-	-
PPI	EBNA4	PSME3	SERF2	-	-	-
PPI	EBNA6	RBPMS	LZTS2	-	-	-
PPI	EBNA6	RBPMS	C1orf94	-	-	-
PPI	EBNA6	RBPMS	C9orf86	-	-	-
PPI	EBNA6	RBPMS	C16orf48	-	-	-
PPI	EBNA6	RBPMS	SERF2	-	-	-
PPI	EBNA6	RBPMS	SMUG1	-	-	-
PPI	EBNALP	MAGEA1	TRIM31	-	-	-
PPI	GB	DVL2	C16orf48	-	-	-
PPI	GB	DVL2	TRAF2	-	-	-
PPI	GB	DVL2	FAM105B	-	-	-
PPI	GM	CCDC33	USHBP1	-	-	-
PPI	GM	CCDC33	TRAF2	-	-	-
PPI	LF2	NDC80	AMOTL2	-	-	-
PPI	LF2	LNX1	TRAF2	-	-	-
PPI	LF2	NDC80	USHBP1	-	-	-
PPI	LF2	LNX1	DCTD	-	-	-
PPI	LF2	LNX1	AKIRIN2	-	-	-
PPI	LMP1	UBQLN1	SMCR7	-	-	-
PPI	LMP1	UBQLN1	KLHDC5	-	-	-
PPI	LMP2A	LNX1	DCTD	-	-	-
PPI	LMP2A	LNX1	AKIRIN2	-	-	-
PPI	LMP2A	LNX1	TRAF2	-	-	-
PPI	BALF1	CEP76	GFAP	203450-137780	781.99	Alexander disease, 203450 (3)
PPI	BALF1	FHL3	CDC42EP1	-	-	-
PPI	BALF1	CEP76	PAICS	-	-	-
PPI	BALF1	FHL3	MED15	-	-	-
PPI	BALF1	FHL3	LNX1	-	-	-
PPI	BALF1	FHL3	TRIP6	-	-	-
PPI	BALF1	CEP76	SALL2	-	-	-
PPI	BALF1	CEP76	KIAA1279	609460-609367	751.3	Goldberg-Shprintzen megacolon syndrome, 609460 (3)
PPI	BALF1	FHL3	LASP1	-	-	-
PPI	BALF1	CEP76	MAGEA11	-	-	-
PPI	BALF1	FHL3	PHC2	-	-	-
PPI	BALF1	FHL3	JTV1	-	-	-
PPI	BALF1	CEP76	CCNK	-	-	-
PPI	BALF1	FHL3	PAK7	-	-	-
PPI	BALF2	GOLGA2	ABLIM1	-	-	-
PPI	BALF2	GOLGA2	TUBGCP4	-	-	-
PPI	BALF2	GOLGA2	RAB2A	-	-	-
PPI	BALF2	GOLGA2	TRIM29	-	-	-
PPI	BALF2	GOLGA2	ZNF250	-	-	-
PPI	BALF2	GOLGA2	POM121	-	-	-
PPI	BBRF2	CEP76	PAICS	-	-	-
PPI	BBRF2	GOLGA2	TRIM29	-	-	-
PPI	BBRF2	MCM6	MCM6	-	-	-
PPI	BBRF2	CEP76	MAGEA11	-	-	-
PPI	BBRF2	GSTA4	GSTA4	-	-	-
PPI	BBRF2	MCM6	MCM6	606255-601806	-	Tall stature, susceptibility to, 606255 (3)
PPI	BBRF2	OPTN	TBC1D17	-	-	-
PPI	BBRF2	OPTN	CCDC53	-	-	-
PPI	BBRF2	CEP76	SALL2	-	-	-
PPI	BBRF2	MCM6	SCNM1	-	-	-
PPI	BBRF2	CEP76	KIAA1279	609460-609367	751.3	Goldberg-Shprintzen megacolon syndrome, 609460 (3)
PPI	BBRF2	MCM6	ALS2CR11	-	-	-
PPI	BBRF2	MCM6	MCM10	-	-	-
PPI	BBRF2	PTBP1	CALCOCO2	-	-	-
PPI	BBRF2	COPB1	TRIM37	253250-605073	259.4	Mulibrey nanism, 253250 (3)
PPI	BBRF2	MCM6	PSMA1	-	-	-
PPI	BBRF2	PTBP1	PTBP1	-	-	-
PPI	BBRF2	CEP76	GFAP	203450-137780	781.99	Alexander disease, 203450 (3)
PPI	BBRF2	CEP76	CCNK	-	-	-
PPI	BBRF2	MCM6	MLLT3	-	-	-
PPI	BBRF2	GOLGA2	TUBGCP4	-	-	-
PPI	BBRF2	GOLGA2	ABLIM1	-	-	-
PPI	BBRF2	PTBP1	SNRPA	-	-	-
PPI	BBRF2	GOLGA2	ZNF250	-	-	-
PPI	BBRF2	MCM6	IL1F5	-	-	-
PPI	BBRF2	MCM6	MCM6	223100-601806	-	Lactase persistance/nonpersistance, 223100 (3)
PPI	BBRF2	GOLGA2	RAB2A	-	-	-
PPI	BBRF2	GOLGA2	POM121	-	-	-
PPI	BDLF2	CEP76	SALL2	-	-	-
PPI	BDLF2	CEP76	PAICS	-	-	-
PPI	BDLF2	CEP76	CCNK	-	-	-
PPI	BDLF2	CEP76	MAGEA11	-	-	-
PPI	BDLF2	CEP76	KIAA1279	609460-609367	751.3	Goldberg-Shprintzen megacolon syndrome, 609460 (3)
PPI	BDLF2	CEP76	GFAP	203450-137780	781.99	Alexander disease, 203450 (3)
PPI	BDLF3	AGR2	POM121	-	-	-
PPI	BDLF3	OGT	NUP62CL	-	-	-
PPI	BFLF2	MDFI	KIAA0408	-	-	-
PPI	BFLF2	MDFI	MCM5	-	-	-
PPI	BFLF2	MDFI	MFSD3	-	-	-
PPI	BFLF2	MDFI	C6orf165	-	-	-
PPI	BFLF2	TRIM27	BEGAIN	-	-	-
PPI	BFLF2	GOLGA2	TUBGCP4	-	-	-
PPI	BFLF2	MDFI	GNAI2	L2148-139360	258	Pituitary ACTH-secreting adenoma (3)
PPI	BFLF2	MDFI	THAP7	-	-	-
PPI	BFLF2	KIAA0774	ZNF655	-	-	-
PPI	BFLF2	MDFI	PVRL2	-	-	-
PPI	BFLF2	MDFI	SLC35A2	218800-191740	277.4	Crigler-Najjar syndrome, type I, 218800 (3)
PPI	BFLF2	MDFI	FBXW5	-	-	-
PPI	BFLF2	MDFI	CRX	300455-312610	362.74	Retinitis pigmentosa, X-linked, with recurrent respiratory infections, 300455 (3)
PPI	BFLF2	MDFI	ATG12	-	-	-
PPI	BFLF2	MDFI	EWSR1	612219-133450	-	Neuroepithelioma, 612219 (3)
PPI	BFLF2	MDFI	CRX	L1629-312610	362.5	Macular degeneration, X-linked atrophic (3)
PPI	BFLF2	MDFI	SIX1	-	-	-
[truncated: 3,865 more rows]

## Sheet: HPV16
Type of interaction	Viral protein	Intermediate human protein	Human protein	Disease Id	ICD-9	OMIM Description
VH-PPI	E6_HPV16	-	QARS	-	-	-
VH-PPI	E6_HPV16	-	SIPA1L2	-	-	-
VH-PPI	E6_HPV16	-	C9orf97	-	-	-
VH-PPI	E6_HPV16	-	ZNF417	-	-	-
VH-PPI	E7_HPV16	-	LMO2	L3193-180385	208.9	Leukemia, acute T-cell (2)
VH-PPI	E7_HPV16	-	ZGPAT	-	-	-
VH-PPI	E7_HPV16	-	CLK2	-	-	-
VH-PPI	E7_HPV16	-	PARD6B	-	-	-
VH-PPI	E7_HPV16	-	TEAD4	-	-	-
VH-PPI	E7_HPV16	-	ATP5O	-	-	-
VH-PPI	E7_HPV16	-	SRP19	-	-	-
VH-PPI	E7_HPV16	-	LGALS14	-	-	-
VH-PPI	E7_HPV16	-	ZNF408	-	-	-
VH-PPI	E7_HPV16	-	TXNDC5	-	-	-
VH-PPI	E7_HPV16	-	PIN4	-	-	-
VH-PPI	E7_HPV16	-	LMO4	-	-	-
VH-PPI	E7_HPV16	-	RPL9	-	-	-
VH-PPI	E7_HPV16	-	ZNF417	-	-	-
VH-PPI	E7_HPV16	-	SYT16	-	-	-
VH-PPI	E7_HPV16	-	POLR1C	-	-	-
VH-PPI	E7_HPV16	-	C5orf55	-	-	-
VH-PPI	E7_HPV16	-	BYSL	-	-	-
VH-PPI	E7_HPV16	-	RBX1	-	-	-
VH-PPI	E7_HPV16	-	FAM164C	-	-	-
VH-PPI	E7_HPV16	-	SCNM1	-	-	-
VH-PPI	E7_HPV16	-	FAM90A1	-	-	-
VH-PPI	E7_HPV16	-	ZBTB25	-	-	-
VH-PPI	E7_HPV16	-	PRKAA2	-	-	-
VH-PPI	E7_HPV16	-	INO80B	-	-	-
VH-PPI	E7_HPV16	-	FARS2	-	-	-
VH-PPI	E7_HPV16	-	FUBP3	-	-	-
VH-PPI	E7_HPV16	-	CCDC94	-	-	-
VH-PPI	E7_HPV16	-	BEND7	-	-	-
VH-PPI	E7_HPV16	-	GATAD2B	-	-	-
VH-PPI	E7_HPV16	-	PRPH	608133-179605	362.74	Retinitis pigmentosa, digenic, 608133 (3)
VH-PPI	E7_HPV16	-	EIF3F	-	-	-
VH-PPI	E7_HPV16	-	CCT8	-	-	-
VH-PPI	E7_HPV16	-	IQGAP1	-	-	-
VH-PPI	E7_HPV16	-	PRPH	L1630-179605	362.7	Macular dystrophy (3)
VH-PPI	E7_HPV16	-	CAD	-	-	-
VH-PPI	E7_HPV16	-	SQSTM1	602080-601530	731	Paget disease of bone, 602080 (3)
VH-PPI	E7_HPV16	-	DNAJA1	-	-	-
VH-PPI	E7_HPV16	-	ALPL	241510-171760	275.3	Hypophosphatasia, childhood, 241510 (3)
VH-PPI	E7_HPV16	-	TBL1Y	-	-	-
VH-PPI	E7_HPV16	-	ALPL	241500-171760	275.3	Hypophosphatasia, infantile, 241500 (3)
VH-PPI	E7_HPV16	-	AKAP8	-	-	-
VH-PPI	E7_HPV16	-	TUBA4A	-	-	-
VH-PPI	E7_HPV16	-	PRPH	608161-179605	362.7	Macular dystrophy, vitelliform, 608161 (3)
VH-PPI	E7_HPV16	-	RIF1	-	-	-
VH-PPI	E7_HPV16	-	VIM	-	-	-
VH-PPI	E7_HPV16	-	CCT2	-	-	-
VH-PPI	E7_HPV16	-	STK38	-	-	-
VH-PPI	E7_HPV16	-	CTTN	-	-	-
VH-PPI	E7_HPV16	-	ZER1	-	-	-
VH-PPI	E7_HPV16	-	TAF15	612237-601574	-	Chondrosarcoma, extraskeletal myxoid, 612237 (1)
VH-PPI	E7_HPV16	-	PRPH	105400-170710	335.2	Amyotrophic lateral sclerosis, susceptibility to, 105400 (3)
VH-PPI	E7_HPV16	-	TARDBP	612069-605078	-	Amyotrophic lateral sclerosis 10, 612069 (3)
VH-PPI	E7_HPV16	-	FLNA	311300-300017	759.89	Otopalatodigital syndrome, type I, 311300 (3)
VH-PPI	E7_HPV16	-	SF3B1	-	-	-
VH-PPI	E7_HPV16	-	RUVBL2	-	-	-
VH-PPI	E7_HPV16	-	TUBA3C	-	-	-
VH-PPI	E7_HPV16	-	CCT4	-	-	-
VH-PPI	E7_HPV16	-	AKAP8L	-	-	-
VH-PPI	E7_HPV16	-	HNRNPC	-	-	-
VH-PPI	E7_HPV16	-	RCOR1	-	-	-
VH-PPI	E7_HPV16	-	SAP130	-	-	-
VH-PPI	E7_HPV16	-	WDR77	-	-	-
VH-PPI	E7_HPV16	-	PFKL	L4474-171860	-	Hemolytic anemia due to phosphofructokinase deficiency (1)
VH-PPI	E7_HPV16	-	HSPA8	-	-	-
VH-PPI	E7_HPV16	-	PRPH	L3259-179605	362.7	Macular dystrophy (3)
VH-PPI	E7_HPV16	-	FLNA	300537-300017	378.3	Heterotopia, periventricular, ED variant, 300537 (3)
VH-PPI	E7_HPV16	-	FLNA	304120-300017	759.89	Otopalatodigital syndrome, type II, 304120 (3)
VH-PPI	E7_HPV16	-	FLNA	L3618-111740	757.39	Blood group, Ss (3)
VH-PPI	E7_HPV16	-	FLNA	304120-300017	756	Otopalatodigital syndrome, type II, 304120 (3)
VH-PPI	E7_HPV16	-	WDR5	-	-	-
VH-PPI	E7_HPV16	-	RBMXL2	-	-	-
VH-PPI	E7_HPV16	-	PRPH	136880-179605	362.74	Retinitis punctata albescens, 136880 (3)
VH-PPI	E7_HPV16	-	PRPH	608161-179605	362.16	Macular dystrophy, vitelliform, 608161 (3)
VH-PPI	E7_HPV16	-	RNF2	-	-	-
VH-PPI	E7_HPV16	-	HNRNPF	-	-	-
VH-PPI	E7_HPV16	-	NUMA1	L3219-164009	208.9	Leukemia, acute promyelocytic, NUMA/RARA type (3)
VH-PPI	E7_HPV16	-	NUMA1	L1531-164009	208.9	Leukemia, acute promyelocytic, NUMA/RARA type (3)
VH-PPI	E7_HPV16	-	TUBB2A	-	-	-
VH-PPI	E7_HPV16	-	PLCB3	-	-	-
VH-PPI	E7_HPV16	-	E2F6	-	-	-
VH-PPI	E7_HPV16	-	FUS	-	-	-
VH-PPI	E7_HPV16	-	DDX17	-	-	-
VH-PPI	E7_HPV16	-	FLNA	309350-300017	733.9	Melnick-Needles syndrome, 309350 (3)
VH-PPI	E7_HPV16	-	RING1	-	-	-
VH-PPI	E7_HPV16	-	RBBP7	-	-	-
VH-PPI	E7_HPV16	-	L3MBTL2	-	-	-
VH-PPI	E7_HPV16	-	TRIP13	-	-	-
VH-PPI	E7_HPV16	-	ALPL	146300-171760	520.4	Odontohypophosphatasia, 146300 (3)
VH-PPI	E7_HPV16	-	FLNA	300049-300017	378.3	Heterotopia, periventricular nodular, with frontometaphyseal dysplasia, 300049 (3)
VH-PPI	E7_HPV16	-	COPA	-	-	-
VH-PPI	E7_HPV16	-	CBX4	-	-	-
VH-PPI	E7_HPV16	-	RFC2	-	-	-
VH-PPI	E7_HPV16	-	PHGDH	601815-606879	-	Phosphoglycerate dehydrogenase deficiency, 601815 (3)
VH-PPI	E7_HPV16	-	PHGDH	-	-	-
VH-PPI	E7_HPV16	-	PHC3	-	-	-
VH-PPI	E7_HPV16	-	MATR3	-	-	-
VH-PPI	E7_HPV16	-	KIAA1949	-	-	-
VH-PPI	E7_HPV16	-	EIF3I	-	-	-
VH-PPI	E7_HPV16	-	HSPA5	-	-	-
VH-PPI	E7_HPV16	-	NFIL3	-	-	-
VH-PPI	E7_HPV16	-	PYGM	232600-608455	271	McArdle disease, 232600 (3)
VH-PPI	E7_HPV16	-	EIF4B	-	-	-
VH-PPI	E7_HPV16	-	KCMF1	-	-	-
VH-PPI	E7_HPV16	-	KIAA1967	-	-	-
VH-PPI	E7_HPV16	-	CUL2	-	-	-
VH-PPI	E7_HPV16	-	EIF4A1	-	-	-
VH-PPI	E7_HPV16	-	PFKL	-	-	-
VH-PPI	E7_HPV16	-	TAF15	-	-	-
VH-PPI	E7_HPV16	-	HNRNPK	-	-	-
VH-PPI	E7_HPV16	-	UBR5	-	-	-
VH-PPI	E7_HPV16	-	MGA	-	-	-
VH-PPI	E7_HPV16	-	PCGF6	-	-	-
VH-PPI	E7_HPV16	-	UBR4	-	-	-
VH-PPI	E7_HPV16	-	PPP1CA	-	-	-
VH-PPI	E7_HPV16	-	NCOA1	-	-	-
VH-PPI	E7_HPV16	-	HNRNPM	-	-	-
VH-PPI	E7_HPV16	-	TBL1XR1	-	-	-
VH-PPI	E7_HPV16	-	MAP7	-	-	-
VH-PPI	E7_HPV16	-	E2F5	-	-	-
VH-PPI	E7_HPV16	-	PRMT5	-	-	-
VH-PPI	E7_HPV16	-	PCBP2	-	-	-
VH-PPI	E7_HPV16	-	HNRNPH1	-	-	-
VH-PPI	E7_HPV16	-	MTA2	-	-	-
VH-PPI	E7_HPV16	-	PRPH	169150-179605	362.7	Butterfly dystrophy, retinal, 169150 (3)
VH-PPI	E7_HPV16	-	TARDBP	-	-	-
VH-PPI	E7_HPV16	-	TUBA1C	-	-	-
VH-PPI	E1_HPV16	-	TRIP13	-	-	-
VH-PPI	E1_HPV16	-	UBE2I	-	-	-
VH-PPI	E2_HPV16	-	SMN2	-	-	-
VH-PPI	E2_HPV16	-	TOPBP1	-	-	-
VH-PPI	E2_HPV16	-	POMP	-	-	-
VH-PPI	E2_HPV16	-	TP53	L2048-191170	170.9	Osteosarcoma (3)
VH-PPI	E2_HPV16	-	TP53	L1243-191170	216.9	Histiocytoma (3)
VH-PPI	E2_HPV16	-	KAT2B	-	-	-
VH-PPI	E2_HPV16	-	TP53	114550-191170	211.5	Hepatocellular carcinoma, 114550 (3)
VH-PPI	E2_HPV16	-	TP53	L1792-191170	259.2	Multiple malignancy syndrome (3)
VH-PPI	E2_HPV16	-	TP53	151623-191170	V84.01	Li-Fraumeni syndrome, 151623 (3)
VH-PPI	E2_HPV16	-	TP53	114480-191170	239.3	Breast cancer, 114480 (3)
VH-PPI	E2_HPV16	-	TP53	202300-191170	194	Adrenal cortical carcinoma, 202300 (3)
VH-PPI	E2_HPV16	-	TBP	607136-600075	333.4	Spinocerebellar ataxia 17, 607136 (3)
VH-PPI	E2_HPV16	-	TBP	607136-600075	334.3	Spinocerebellar ataxia 17, 607136 (3)
VH-PPI	E2_HPV16	-	TBP	168600-600075	332	Parkinson disease, 168600 (3)
VH-PPI	E2_HPV16	-	GTF2B	-	-	-
VH-PPI	E2_HPV16	-	CEBPB	L3184-150270	253.3	Laryngeal adductor paralysis (2) ()
VH-PPI	E2_HPV16	-	TP53	161550-191170	147.9	Nasopharyngeal carcinoma, 161550 (3)
VH-PPI	E2_HPV16	-	CITED1	-	-	-
VH-PPI	E2_HPV16	-	CEBPA	601626-116897	208.9	Leukemia, acute myeloid, 601626 (3)
VH-PPI	E2_HPV16	-	TP53	L3557-191170	193	Thyroid carcinoma (3)
VH-PPI	E2_HPV16	-	TP53	260350-191170	157.8	Pancreatic cancer, 260350 (3)
VH-PPI	E2_HPV16	-	TP53	L2588-191170	193	Thyroid carcinoma (3)
VH-PPI	E2_HPV16	-	TP53	L3409-191170	170.9	Osteosarcoma (3)
VH-PPI	E2_HPV16	-	TP53	114500-191170	153	Colorectal cancer, 114500 (3)
VH-PPI	E2_HPV16	-	BRD4	-	-	-
VH-PPI	E4_HPV16	-	SRPK1	-	-	-
VH-PPI	E5_HPV16	-	HLA-A	608579-142800	695.1	Stevens-Johnson syndrome, susceptibility to, 608579 (3)
VH-PPI	E5_HPV16	-	HLA-A	106300-142800	720	Ankylosing spondylitis, susceptibility to, 1, 106300 (3)
VH-PPI	E5_HPV16	-	HLA-A	L3664-142800	995.27	Abacavir hypersensitivity, susceptibility to (3)
VH-PPI	E6_HPV16	-	CREBBP	303700-303900	368.54	Blue-cone monochromacy, 303700 (3)
VH-PPI	E6_HPV16	-	TP53	260350-191170	157.8	Pancreatic cancer, 260350 (3)
VH-PPI	E6_HPV16	-	BRCA1	L343-113705	239.3	Breast cancer-1 (3)
VH-PPI	E6_HPV16	-	BRCA1	L3413-113705	183	Ovarian cancer (3)
VH-PPI	E6_HPV16	-	CREBBP	L2919-303900	368.5	Colorblindness, protan (3)
VH-PPI	E6_HPV16	-	CREBBP	180849-600140	759.89	Rubenstein-Taybi syndrome, 180849 (3)
VH-PPI	E6_HPV16	-	RCN2	-	-	-
VH-PPI	E6_HPV16	-	BRCA1	L2052-113705	183	Ovarian cancer (3)
VH-PPI	E6_HPV16	-	TP73	L3379-601990	194	Neuroblastoma (1) ()
VH-PPI	E6_HPV16	-	XRCC1	-	-	-
VH-PPI	E6_HPV16	-	EP300	180849-602700	759.89	Rubinstein-Taybi syndrome, 180849 (3)
VH-PPI	E6_HPV16	-	EP300	114500-602700	153	Colorectal cancer, 114500 (3)
VH-PPI	E6_HPV16	-	MAGI1	-	-	-
VH-PPI	E6_HPV16	-	PTPN3	-	-	-
VH-PPI	E6_HPV16	-	CREBBP	L587-303900	368.5	Colorblindness, protan (3)
VH-PPI	E6_HPV16	-	TP53	L2048-191170	170.9	Osteosarcoma (3)
VH-PPI	E6_HPV16	-	TP53	161550-191170	147.9	Nasopharyngeal carcinoma, 161550 (3)
VH-PPI	E6_HPV16	-	FADD	-	-	-
VH-PPI	E6_HPV16	-	BRCA1	L359-113705	239.3	Breast-ovarian cancer (3)
VH-PPI	E6_HPV16	-	TP53	L3409-191170	170.9	Osteosarcoma (3)
VH-PPI	E6_HPV16	-	TP53	114550-191170	211.5	Hepatocellular carcinoma, 114550 (3)
VH-PPI	E6_HPV16	-	IRF3	-	-	-
VH-PPI	E6_HPV16	-	TP53	L1243-191170	216.9	Histiocytoma (3)
VH-PPI	E6_HPV16	-	TP53	L1792-191170	259.2	Multiple malignancy syndrome (3)
VH-PPI	E6_HPV16	-	TP53	202300-191170	194	Adrenal cortical carcinoma, 202300 (3)
VH-PPI	E6_HPV16	-	BRCA1	L2091-113705	158.8	Papillary serous carcinoma of the peritoneum (3)
VH-PPI	E6_HPV16	-	SIPA1L1	-	-	-
VH-PPI	E6_HPV16	-	MCM7	-	-	-
VH-PPI	E6_HPV16	-	TSC2	606690-191092	518.89	Lymphangioleiomyomatosis, somatic, 606690 (3)
VH-PPI	E6_HPV16	-	TAX1BP3	-	-	-
VH-PPI	E6_HPV16	-	GPS2	-	-	-
VH-PPI	E6_HPV16	-	KPNA2	-	-	-
VH-PPI	E6_HPV16	-	BAK1	-	-	-
VH-PPI	E6_HPV16	-	TP53	L3557-191170	193	Thyroid carcinoma (3)
VH-PPI	E6_HPV16	-	DLG1	-	-	-
VH-PPI	E6_HPV16	-	UBE3A	105830-601623	759.89	Angelman syndrome, 105830 (3)
VH-PPI	E6_HPV16	-	SERTAD1	-	-	-
VH-PPI	E6_HPV16	-	SCRIB	-	-	-
VH-PPI	E6_HPV16	-	TP53	114480-191170	239.3	Breast cancer, 114480 (3)
VH-PPI	E6_HPV16	-	KPNB1	-	-	-
VH-PPI	E6_HPV16	-	TNPO1	-	-	-
VH-PPI	E6_HPV16	-	TP53	151623-191170	V84.01	Li-Fraumeni syndrome, 151623 (3)
VH-PPI	E6_HPV16	-	TSC2	191100-191092	759.5	Tuberous sclerosis-2, 191100 (3)
VH-PPI	E6_HPV16	-	MYC	113970-190080	200.2	Burkitt lymphoma, 113970 (3)
VH-PPI	E6_HPV16	-	FBLN1	608180-135820	755.1	Synpolydactyly, 3/3'4, associated with metacarpal and metatarsal synostoses, 608180 (3)
VH-PPI	E6_HPV16	-	TP53	114500-191170	153	Colorectal cancer, 114500 (3)
VH-PPI	E6_HPV16	-	TP53	L2588-191170	193	Thyroid carcinoma (3)
VH-PPI	E6_HPV16	-	TNFRSF1A	142680-191190	277.3	Periodic fever, familial, 142680 (3)
VH-PPI	E7_HPV16	-	BRCA1	L2091-113705	158.8	Papillary serous carcinoma of the peritoneum (3)
VH-PPI	E7_HPV16	-	CREBBP	L2919-303900	368.5	Colorblindness, protan (3)
VH-PPI	E7_HPV16	-	RAN	-	-	-
VH-PPI	E7_HPV16	-	BRCA1	L3413-113705	183	Ovarian cancer (3)
VH-PPI	E7_HPV16	-	IRF1	L1845-147575	205.9	Myelogenous leukemia, acute (3)
VH-PPI	E7_HPV16	-	RPS25	-	-	-
VH-PPI	E7_HPV16	-	CDKN1A	-	-	-
VH-PPI	E7_HPV16	-	IRF1	L3391-147575	162.9	Nonsmall cell lung cancer (3)
VH-PPI	E7_HPV16	-	NOLC1	-	-	-
VH-PPI	E7_HPV16	-	HDAC2	-	-	-
VH-PPI	E7_HPV16	-	PPP2R1A	-	-	-
VH-PPI	E7_HPV16	-	IRF1	137215-147575	151.9	Gastric cancer, 137215 (3)
VH-PPI	E7_HPV16	-	CHD4	-	-	-
VH-PPI	E7_HPV16	-	BRCA1	L359-113705	239.3	Breast-ovarian cancer (3)
VH-PPI	E7_HPV16	-	CREBBP	L587-303900	368.5	Colorblindness, protan (3)
VH-PPI	E7_HPV16	-	CREBBP	303700-303900	368.54	Blue-cone monochromacy, 303700 (3)
VH-PPI	E7_HPV16	-	JUN	-	-	-
VH-PPI	E7_HPV16	-	BRCA1	L2052-113705	183	Ovarian cancer (3)
VH-PPI	E7_HPV16	-	KAT2B	-	-	-
VH-PPI	E7_HPV16	-	PPP2CA	-	-	-
VH-PPI	E7_HPV16	-	FOXM1	-	-	-
VH-PPI	E7_HPV16	-	HDAC1	-	-	-
VH-PPI	E7_HPV16	-	SNW1	-	-	-
VH-PPI	E7_HPV16	-	SIVA1	-	-	-
VH-PPI	E7_HPV16	-	DNAJA3	-	-	-
VH-PPI	E7_HPV16	-	PKM2	-	-	-
VH-PPI	E7_HPV16	-	FOS	-	-	-
VH-PPI	E7_HPV16	-	JUNB	-	-	-
VH-PPI	E7_HPV16	-	CREBBP	180849-600140	759.89	Rubenstein-Taybi syndrome, 180849 (3)
VH-PPI	E7_HPV16	-	PSMC1	-	-	-
VH-PPI	E7_HPV16	-	MYC	113970-190080	200.2	Burkitt lymphoma, 113970 (3)
VH-PPI	E7_HPV16	-	TBP	168600-600075	332	Parkinson disease, 168600 (3)
VH-PPI	E7_HPV16	-	JUND	-	-	-
VH-PPI	E7_HPV16	-	IRF1	L3353-147575	742.59	Myelodysplastic syndrome, preleukemic (3)
VH-PPI	E7_HPV16	-	IRF1	L3355-147575	205.9	Myelogenous leukemia, acute (3)
VH-PPI	E7_HPV16	-	TBP	607136-600075	333.4	Spinocerebellar ataxia 17, 607136 (3)
VH-PPI	E7_HPV16	-	IRF1	L1842-147575	742.59	Myelodysplastic syndrome, preleukemic (3)
VH-PPI	E7_HPV16	-	BRCA1	L343-113705	239.3	Breast cancer-1 (3)
VH-PPI	E7_HPV16	-	IRF1	L1959-147575	162.9	Nonsmall cell lung cancer (3)
VH-PPI	E7_HPV16	-	EP300	114500-602700	153	Colorectal cancer, 114500 (3)
VH-PPI	E7_HPV16	-	POU5F1	-	-	-
VH-PPI	E7_HPV16	-	EP300	180849-602700	759.89	Rubinstein-Taybi syndrome, 180849 (3)
VH-PPI	E7_HPV16	-	TBP	607136-600075	334.3	Spinocerebellar ataxia 17, 607136 (3)
VH-PPI	E7_HPV16	-	IRF1	153550-147575	281.9	Macrocytic anemia, refractory, of 5q- syndrome, 153550 (3)
VH-PPI	L1_HPV16	-	KPNB1	-	-	-
VH-PPI	L1_HPV16	-	KPNA2	-	-	-
VH-PPI	L1_HPV16	-	TNPO1	-	-	-
VH-PPI	L1_HPV16	-	IPO5	-	-	-
VH-PPI	L2_HPV16	-	TINAGL1	-	-	-
VH-PPI	L2_HPV16	-	TNPO1	-	-	-
VH-PPI	L2_HPV16	-	GADD45GIP1	-	-	-
VH-PPI	L2_HPV16	-	IPO5	-	-	-
VH-PPI	L2_HPV16	-	KPNA2	-	-	-
VH-PPI	L2_HPV16	-	MAN2B1	248500-609458	271.8	Mannosidosis, alpha-, types I and II, 248500 (3)
VH-PPI	L2_HPV16	-	KPNB1	-	-	-
VH-PPI	L2_HPV16	-	PATZ1	-	-	-
VH-PPI	E7_HPV16	-	RBL1	-	-	-
VH-PPI	E7_HPV16	-	CDK2	-	-	-
VH-PPI	E7_HPV16	-	CCNE2	-	-	-
VH-PPI	E7_HPV16	-	TFDP2	-	-	-
VH-PPI	E7_HPV16	-	CCNA2	-	-	-
VH-PPI	E7_HPV16	-	CDC2	-	-	-
VH-PPI	E7_HPV16	-	TFDP1	-	-	-
VH-PPI	E7_HPV16	-	E2F4	-	-	-
VH-PPI	E7_HPV16	-	E2F1	-	-	-
VH-PPI	E7_HPV16	-	E2F3	-	-	-
VH-PPI	E7_HPV16	-	RBL2	600118-602536	331.4	Warburg micro syndrome 1, 600118 (3)
VH-PPI	E7_HPV16	-	E2F2	-	-	-
VH-PPI	E7_HPV16	-	RB1	259500-180200	170.9	Osteosarcoma, 259500 (2)
VH-PPI	E7_HPV16	-	RB1	L2329-180200	190.5	Retinoblastoma (3)
VH-PPI	E7_HPV16	-	RB1	109800-180200	188.9	Bladder cancer, 109800 (3)
VH-PPI	E7_HPV16	-	RB1	L4910-180200	-	Pinealoma with bilateral retinoblastoma (2)
PPI	E7_HPV16	BEND7	LRRC68	-	-	-
PPI	E6_HPV16	QARS	TRAF2	-	-	-
PPI	E7_HPV16	BEND7	SDCBP2	-	-	-
PPI	E7_HPV16	POLR1C	POLR1D	-	-	-
PPI	E7_HPV16	BEND7	U2AF2	-	-	-
PPI	E7_HPV16	CLK2	CLK3	-	-	-
PPI	E7_HPV16	ZBTB25	TRAF2	-	-	-
PPI	E7_HPV16	FAM164C	KRT15	-	-	-
PPI	E7_HPV16	TEAD4	WWTR1	-	-	-
PPI	E7_HPV16	BEND7	PSMF1	-	-	-
PPI	E7_HPV16	FAM164C	KRT20	-	-	-
PPI	E7_HPV16	C5orf55	TRAF2	-	-	-
PPI	E7_HPV16	FAM164C	CCDC85B	-	-	-
PPI	E7_HPV16	BEND7	NIF3L1	-	-	-
PPI	E7_HPV16	FAM164C	CALCOCO2	-	-	-
PPI	E7_HPV16	BEND7	EMD	310300-300384	756.55	Emery-Dreifuss muscular dystrophy, 310300 (3)
PPI	E6_HPV16	ZNF417	TRIM37	253250-605073	259.4	Mulibrey nanism, 253250 (3)
PPI	E6_HPV16	ZNF417	MDFI	-	-	-
PPI	E6_HPV16	ZNF417	KRTAP4-12	-	-	-
PPI	E6_HPV16	ZNF417	CCDC85B	-	-	-
PPI	E6_HPV16	ZNF417	ZBTB43	-	-	-
PPI	E6_HPV16	ZNF417	CEP72	-	-	-
PPI	E6_HPV16	QARS	ASL	207900-608310	270.6	Argininosuccinic aciduria, 207900 (3)
PPI	E6_HPV16	ZNF417	BEGAIN	-	-	-
PPI	E7_HPV16	BYSL	TRIM37	253250-605073	259.4	Mulibrey nanism, 253250 (3)
PPI	E7_HPV16	TEAD4	CCDC85B	-	-	-
PPI	E7_HPV16	ZBTB25	MAPK9	-	-	-
PPI	E7_HPV16	ZNF417	CCDC85B	-	-	-
PPI	E7_HPV16	LMO2	MAPRE3	-	-	-
PPI	E7_HPV16	ZNF408	THAP1	-	-	-
PPI	E7_HPV16	LMO2	STAT1	L2518-600555	349.9	STAT1 deficiency, complete (3)
PPI	E7_HPV16	ZNF417	BEGAIN	-	-	-
PPI	E7_HPV16	ZNF408	THAP1	L4329-602629	-	Dystonia-6, torsion (2)
PPI	E7_HPV16	ZNF408	KHDRBS3	-	-	-
PPI	E7_HPV16	ZNF408	CALCOCO2	-	-	-
PPI	E7_HPV16	C5orf55	TRIP6	-	-	-
PPI	E7_HPV16	ZNF417	KRTAP4-12	-	-	-
PPI	E7_HPV16	LMO2	EHMT2	-	-	-
PPI	E7_HPV16	SCNM1	MCM6	223100-601806	-	Lactase persistance/nonpersistance, 223100 (3)
PPI	E7_HPV16	ZBTB25	MDFI	-	-	-
PPI	E7_HPV16	ZNF417	MDFI	-	-	-
PPI	E7_HPV16	LMO2	STAT1	209950-600555	31.9	Mycobacterial infection, atypical, familial disseminated, 209950 (3)
PPI	E7_HPV16	SCNM1	MCM6	606255-601806	-	Tall stature, susceptibility to, 606255 (3)
PPI	E7_HPV16	ZNF408	DVL3	-	-	-
PPI	E7_HPV16	SCNM1	CCDC85B	-	-	-
PPI	E7_HPV16	SCNM1	MCM6	-	-	-
PPI	E7_HPV16	RPL9	DHPS	-	-	-
PPI	E7_HPV16	ZBTB25	SORBS3	-	-	-
PPI	E7_HPV16	LMO2	DAZAP2	-	-	-
PPI	E7_HPV16	ZNF417	TRIM37	253250-605073	259.4	Mulibrey nanism, 253250 (3)
PPI	E7_HPV16	ZNF417	ZBTB43	-	-	-
PPI	E7_HPV16	ZNF408	KRTAP4-12	-	-	-
PPI	E7_HPV16	ZNF408	RALYL	-	-	-
PPI	E7_HPV16	LMO2	STAT1	L3489-600555	349.9	STAT1 deficiency, complete (3)
PPI	E7_HPV16	LMO2	MAPRE2	-	-	-
PPI	E7_HPV16	ZBTB25	C19orf50	-	-	-
PPI	E7_HPV16	ZNF417	CEP72	-	-	-
PPI	E7_HPV16	POLR1C	NME1	256700-156490	194	Neuroblastoma, 256700 (3)
PPI	E7_HPV16	ZNF408	MDFI	-	-	-
PPI	E7_HPV16	ZNF408	CEP70	-	-	-
PPI	E7_HPV16	ZNF408	LDOC1	-	-	-
PPI	E7_HPV16	RPL9	FAM100A	-	-	-
PPI	E6_HPV16	QARS	CPNE3	-	-	-
PPI	E6_HPV16	QARS	DUSP11	-	-	-
PPI	E7_HPV16	RPL9	MOCS2	252150-603708	269.3	Molybdenum cofactor deficiency, type B, 252150 (3)
PPI	E7_HPV16	INO80B	CD81	-	-	-
PPI	E7_HPV16	INO80B	UIMC1	-	-	-
PPI	E7_HPV16	PIN4	ASCC2	-	-	-
PPI	E7_HPV16	RPL9	RPS3	-	-	-
PPI	E7_HPV16	PIN4	DNM1	-	-	-
PPI	E7_HPV16	PIN4	SPTAN1	-	-	-
PPI	E7_HPV16	PIN4	EZH2	-	-	-
PPI	E7_HPV16	RPL9	SORBS2	-	-	-
PPI	E7_HPV16	ZBTB25	TFG	612237-602498	-	Chondrosarcoma, extraskeletal myxoid, 612237 (1)
PPI	E7_HPV16	ZNF408	TRIM27	-	-	-
PPI	E7_HPV16	ZBTB25	DMRTB1	-	-	-
PPI	E7_HPV16	ZNF408	KIAA0774	-	-	-
PPI	E7_HPV16	BYSL	RAD54B	L1614-604289	202.8	Lymphoma, non-Hodgkin (3)
PPI	E7_HPV16	ZBTB25	REEP6	-	-	-
PPI	E7_HPV16	ZBTB25	ZNF238	-	-	-
PPI	E7_HPV16	ZBTB25	APIP	-	-	-
PPI	E7_HPV16	ATP5O	EFHC2	-	-	-
PPI	E7_HPV16	BEND7	THAP1	L4329-602629	-	Dystonia-6, torsion (2)
PPI	E7_HPV16	ZBTB25	IKBKG	L4566-300248	-	Invasive pneumococcal d
PPI	E7_HPV16	ZNF408	CCNDBP1	-	-	-
PPI	E7_HPV16	BEND7	GYS1	-	-	-
PPI	E7_HPV16	BYSL	GABPB1	-	-	-
PPI	E7_HPV16	BYSL	DNAJA3	-	-	-
PPI	E7_HPV16	ZBTB25	IKBKG	308300-300248	757.33	Incontinentia pigmenti, type II, 308300 (3)
PPI	E7_HPV16	ZBTB25	KIAA0774	-	-	-
PPI	E7_HPV16	BYSL	EPS8	-	-	-
PPI	E7_HPV16	BYSL	CEP70	-	-	-
PPI	E7_HPV16	ZBTB25	RAD54B	L576-604289	153	Colon adenocarcinoma (3)
PPI	E7_HPV16	BEND7	TCEB3	-	-	-
PPI	E7_HPV16	ZBTB25	TSC22D4	-	-	-
PPI	E7_HPV16	BYSL	RAD54B	L576-604289	153	Colon adenocarcinoma (3)
PPI	E7_HPV16	ZBTB25	IKBKG	300636-300248	-	Atypical mycobacteriosis, familial, 300636 (3)
PPI	E7_HPV16	ZBTB25	TRIM23	-	-	-
PPI	E7_HPV16	ZBTB25	CEP70	-	-	-
PPI	E7_HPV16	BYSL	TRIP6	-	-	-
PPI	E7_HPV16	ZBTB25	ADAMTSL4	-	-	-
PPI	E7_HPV16	BEND7	THAP1	-	-	-
PPI	E7_HPV16	ZBTB25	IKBKG	300291-300248	757.31	Ectodermal dysplasia, hypohidrotic, with immune deficiency, 300291 (3)
PPI	E7_HPV16	ZBTB25	SDCCAG3	-	-	-
PPI	E7_HPV16	BYSL	SDCCAG3	-	-	-
PPI	E7_HPV16	ZBTB25	IKBKG	300301-300248	757.31	Ectodermal dysplasia, anhidrotic, lymphedema and immunodeficiency, 300301 (3)
PPI	E7_HPV16	ATP5O	DTNBP1	203300-607145	270.2	Hermansky-Pudlak syndrome 7, 203300 (3)
PPI	E7_HPV16	ATP5O	DTNBP1	181500-607145	295.9	Schizophrenia, 181500 (2)
PPI	E7_HPV16	BEND7	GYS1	611556-138570	-	Glycogen storage disease 0, muscle, 611556 (3)
PPI	E7_HPV16	BYSL	PPCDC	-	-	-
PPI	E7_HPV16	ATP5O	NT5C2	-	-	-
PPI	E7_HPV16	ZBTB25	RAD54B	L3253-604289	202.8	Lymphoma, non-Hodgkin (3)
PPI	E7_HPV16	ZBTB25	RAD54B	L1614-604289	202.8	Lymphoma, non-Hodgkin (3)
PPI	E7_HPV16	BEND7	TRIM26	-	-	-
PPI	E7_HPV16	ZBTB25	TFG	-	-	-
PPI	E7_HPV16	ATP5O	CEP70	-	-	-
PPI	E7_HPV16	BEND7	C1orf35	-	-	-
PPI	E7_HPV16	CCDC94	TFCP2	-	-	-
PPI	E7_HPV16	ATP5O	KIAA0774	-	-	-
PPI	E7_HPV16	BYSL	LDOC1	-	-	-
PPI	E7_HPV16	FUBP3	DMRTB1	-	-	-
PPI	E7_HPV16	ZBTB25	FAM118A	-	-	-
PPI	E7_HPV16	ZNF408	DNAJA3	-	-	-
PPI	E7_HPV16	ZBTB25	CCNDBP1	-	-	-
PPI	E7_HPV16	BYSL	RAD54B	L3253-604289	202.8	Lymphoma, non-Hodgkin (3)
PPI	E7_HPV16	ZBTB25	KRT15	-	-	-
PPI	E7_HPV16	BYSL	NXT1	-	-	-
PPI	E7_HPV16	BEND7	AEN	-	-	-
PPI	E7_HPV16	BYSL	EMD	310300-300384	756.55	Emery-Dreifuss muscular dystrophy, 310300 (3)
PPI	E7_HPV16	ZBTB25	NT5C2	-	-	-
PPI	E7_HPV16	ZBTB25	RAB3IL1	-	-	-
PPI	E7_HPV16	ZBTB25	IKBKG	300584-300248	-	Immunodeficiency, isolated, 300584 (3)
PPI	E7_HPV16	BEND7	PLEKHF2	-	-	-
PPI	E7_HPV16	VIM	TCHP	-	-	-
PPI	E7_HPV16	HNRNPC	KRAS	211980-190070	162.9	Lung cancer, 211980 (3)
PPI	E7_HPV16	VIM	KIAA0408	-	-	-
PPI	E7_HPV16	VIM	GOPC	102530-606845	-	Globozoospermia, 102530 (1) ()
PPI	E7_HPV16	VIM	FAM107A	-	-	-
PPI	E7_HPV16	VIM	NOC4L	-	-	-
PPI	E7_HPV16	VIM	ABLIM1	-	-	-
PPI	E7_HPV16	RUVBL2	RP11-529I10.4	-	-	-
PPI	E7_HPV16	VIM	GOPC	-	-	-
PPI	E7_HPV16	TRIP13	SMUG1	-	-	-
PPI	E7_HPV16	VIM	ALS2CR11	-	-	-
PPI	E7_HPV16	VIM	PSMA1	-	-	-
PPI	E7_HPV16	VIM	APIP	-	-	-
PPI	E7_HPV16	HNRNPC	KRAS	260350-190070	157.8	Pancreatic carcinoma, somatic, 260350 (3)
PPI	E7_HPV16	HNRNPC	KRAS	114480-190070	239.3	Breast cancer, somatic, 114480 (3)
PPI	E7_HPV16	HNRNPC	KRAS	609942-190070	-	Noonan syndrome 3, 609942 (3)
PPI	E7_HPV16	VIM	PDLIM1	-	-	-
PPI	E7_HPV16	HNRNPC	KRAS	L3204-190070	208.9	Leukemia, acute myelogenous (3)
PPI	E7_HPV16	VIM	TUBGCP4	-	-	-
PPI	E7_HPV16	L3MBTL2	C1orf149	-	-	-
PPI	E7_HPV16	HNRNPC	KRAS	109800-190070	188.9	Bladder cancer, 109800 (3)
PPI	E7_HPV16	VIM	KRT20	-	-	-
PPI	E7_HPV16	VIM	GFAP	203450-137780	781.99	Alexander disease, 203450 (3)
PPI	E7_HPV16	HNRNPC	KRAS	218040-190070	744.9	Costello syndrome, 218040 (3)
PPI	E7_HPV16	VIM	NIF3L1	-	-	-
PPI	E7_HPV16	HNRNPK	RBM42	-	-	-
PPI	E7_HPV16	VIM	RIBC2	-	-	-
PPI	E7_HPV16	HNRNPC	KRAS	L1514-190070	208.9	Leukemia, acute myelogenous (3)
PPI	E7_HPV16	HNRNPC	KRAS	137215-190070	151.9	Stomach cancer, 137215 (3)
PPI	E7_HPV16	WDR5	MBIP	-	-	-
PPI	E7_HPV16	HNRNPK	NCK2	-	-	-
PPI	E7_HPV16	TRIP13	CPSF3L	-	-	-
PPI	E7_HPV16	TRIP13	STAMBPL1	-	-	-
PPI	E7_HPV16	HNRNPC	PHKB	261750-172490	-	Phosphorylase kinase deficiency of liver and muscle, autosomal recessive, 261750 (3)
PPI	E7_HPV16	TRIP13	PLAC8	-	-	-
PPI	E7_HPV16	HNRNPM	LMO3	-	-	-
PPI	E7_HPV16	HNRNPK	GRAP2	-	-	-
PPI	E7_HPV16	HNRNPK	HNRNPK	-	-	-
PPI	E7_HPV16	HNRNPK	SORBS3	-	-	-
PPI	E7_HPV16	HNRNPC	UBE2I	-	-	-
PPI	E7_HPV16	TRIP13	CARD14	-	-	-
PPI	E7_HPV16	HNRNPK	MATR3	-	-	-
PPI	E7_HPV16	PRPH	KRT15	-	-	-
PPI	E7_HPV16	HNRNPK	KHDRBS3	-	-	-
PPI	E7_HPV16	TRIP13	ADAM15	-	-	-
PPI	E7_HPV16	HNRNPC	RBM41	-	-	-
PPI	E7_HPV16	HNRNPK	UBE2I	-	-	-
PPI	E7_HPV16	HNRNPK	KHDRBS2	-	-	-
PPI	E7_HPV16	PFKL	KRTAP4-12	-	-	-
PPI	E7_HPV16	TRIP13	PLK3	-	-	-
PPI	E7_HPV16	TRIP13	SIGLEC5	-	-	-
PPI	E7_HPV16	HNRNPC	CCDC85B	-	-	-
PPI	E7_HPV16	HNRNPC	FXR2	-	-	-
PPI	E7_HPV16	MATR3	HNRNPK	-	-	-
PPI	E7_HPV16	HNRNPK	RBM41	-	-	-
PPI	E7_HPV16	SQSTM1	GABARAPL1	-	-	-
PPI	E7_HPV16	TRIP13	C2orf51	-	-	-
PPI	E7_HPV16	HNRNPC	AP1M1	-	-	-
PPI	E7_HPV16	SQSTM1	GABARAPL2	-	-	-
PPI	E7_HPV16	HNRNPK	NPDC1	-	-	-
PPI	E7_HPV16	TRIP13	SEMA4G	-	-	-
PPI	E7_HPV16	DDX17	LNX1	-	-	-
PPI	E7_HPV16	TRIP13	NME4	-	-	-
PPI	E7_HPV16	HNRNPK	CNNM3	-	-	-
PPI	E7_HPV16	TRIP13	PLSCR3	-	-	-
PPI	E7_HPV16	HNRNPK	RBM7	-	-	-
PPI	E7_HPV16	TRIP13	SELENBP1	-	-	-
PPI	E7_HPV16	TRIP13	GPSM1	-	-	-
PPI	E7_HPV16	HNRNPC	PHKB	-	-	-
PPI	E7_HPV16	HNRNPC	RALYL	-	-	-
PPI	E7_HPV16	TRIP13	KRTAP3-2	-	-	-
PPI	E7_HPV16	TRIP13	GPRIN2	-	-	-
PPI	E7_HPV16	TRIP13	CYB5R2	-	-	-
PPI	E7_HPV16	TRIP13	SEC24A	-	-	-
PPI	E7_HPV16	HNRNPK	RBMX	-	-	-
PPI	E7_HPV16	TUBA3C	NMI	-	-	-
PPI	E7_HPV16	TRIP13	LNX1	-	-	-
PPI	E7_HPV16	TRIP13	ASB13	-	-	-
PPI	E7_HPV16	DDX17	SF1	L3504-184757	302.9	Sex reversal, XY, with/without adrenal failure (3)
PPI	E7_HPV16	E2F6	TFDP2	-	-	-
PPI	E7_HPV16	EIF3F	HAX1	610738-605998	-	Neutropenia, severe congenital, autosomal recessive 3, 610738 (3)
PPI	E7_HPV16	DDX17	SF1	L2424-184757	302.9	Sex reversal, XY, with adrenal failure (3)
PPI	E7_HPV16	HNRNPC	KPNA3	-	-	-
PPI	E7_HPV16	TRIP13	GALT	230400-606999	271.1	Galactosemia, 230400 (3)
PPI	E7_HPV16	DDX17	WBP11	-	-	-
PPI	E7_HPV16	HNRNPC	LMO3	-	-	-
PPI	E7_HPV16	DDX17	SF1	L4314-184757	-	Disorder of sex development, 46XY (3)
PPI	E7_HPV16	HNRNPM	RBM4B	-	-	-
PPI	E7_HPV16	TRIP13	ZNF655	-	-	-
PPI	E7_HPV16	HNRNPC	ZNF581	-	-	-
PPI	E7_HPV16	HNRNPC	PIN1	-	-	-
PPI	E7_HPV16	TRIP13	RBPMS	-	-	-
PPI	E7_HPV16	HNRNPK	QKI	-	-	-
PPI	E7_HPV16	DDX17	SORBS3	-	-	-
PPI	E7_HPV16	L3MBTL2	PHF10	-	-	-
PPI	E7_HPV16	L3MBTL2	STAM2	-	-	-
PPI	E7_HPV16	EIF3F	HAX1	-	-	-
PPI	E7_HPV16	RING1	RYBP	-	-	-
PPI	E7_HPV16	SQSTM1	RAD23A	-	-	-
PPI	E7_HPV16	DDX17	SF1	L52-184757	255.4	Adrenocortical insufficiency without ovarian defect (3)
PPI	E7_HPV16	HNRNPC	HNRNPC	-	-	-
PPI	E7_HPV16	TRIP13	PBLD	-	-	-
PPI	E7_HPV16	TRIP13	TRIP13	-	-	-
PPI	E7_HPV16	VIM	MYST2	-	-	-
PPI	E7_HPV16	TRIP13	MAD2L1BP	-	-	-
PPI	E7_HPV16	HSPA8	HSPBP1	-	-	-
PPI	E7_HPV16	TRIP13	KIAA1609	-	-	-
PPI	E7_HPV16	TRIP13	DTX2	-	-	-
PPI	E7_HPV16	TRIP13	PARK2	604370-602544	-	Adenocarcinoma, ovarian, somatic, 604370 (3)
PPI	E7_HPV16	TRIP13	PARK2	600116-602544	332	Parkinson disease, juvenile, type 2, 600116 (3)
PPI	E7_HPV16	TRIP13	COMT	181500-116790	295.9	Schizophrenia, susceptibility to, 181500 (3)
PPI	E7_HPV16	TRIP13	COMT	167870-116790	-	Panic disorder, susceptibility to, 167870 (3)
PPI	E7_HPV16	TRIP13	LASP1	-	-	-
PPI	E7_HPV16	TRIP13	HDHD3	-	-	-
PPI	E7_HPV16	TRIP13	C11orf54	-	-	-
PPI	E7_HPV16	TRIP13	ARL11	151400-609351	208.9	Leukemia, chronic lymphatic, susceptibility to, 151400 (3)
PPI	E7_HPV16	TRIP13	WDYHV1	-	-	-
PPI	E7_HPV16	TRIP13	GLYCTK	-	-	-
PPI	E7_HPV16	TRIP13	DDAH2	-	-	-
PPI	E7_HPV16	TRIP13	LOXL4	-	-	-
PPI	E7_HPV16	TRIP13	PARK2	211980-602544	-	Adenocarcinoma of lung, somatic, 211980 (3)
PPI	E7_HPV16	TRIP13	NIF3L1	-	-	-
PPI	E7_HPV16	TRIP13	PLSCR4	-	-	-
PPI	E7_HPV16	TRIP13	PPP2CA	-	-	-
PPI	E7_HPV16	TRIP13	PARK2	607572-602544	30.9	Leprosy, susceptibility to, 607572 (3)
PPI	E7_HPV16	E2F6	TFDP1	-	-	-
PPI	E7_HPV16	VIM	ATN1	125370-607462	345.1	Dentatorubro-pallidoluysian atrophy, 125370 (3)
PPI	E7_HPV16	HSPA8	FTH1	143890-606945	272	Hypercholesterolemia, familial, 143890 (3)
PPI	E7_HPV16	HSPA8	FTH1	L1435-134770	285.9	Iron overload, autosomal dominant (3)
PPI	E7_HPV16	VIM	SLC27A6	-	-	-
PPI	E7_HPV16	CTTN	CHD3	-	-	-
PPI	E7_HPV16	HSPA8	UBC	-	-	-
PPI	E7_HPV16	VIM	HABP4	-	-	-
PPI	E7_HPV16	VIM	C1orf103	-	-	-
PPI	E7_HPV16	HSPA8	FTH1	L3175-134770	285.9	Iron overload, autosomal dominant (3)
PPI	E7_HPV16	VIM	XRCC4	-	-	-
PPI	E7_HPV16	VIM	CASP8	114550-601763	211.5	Hepatocellular carcinoma, somatic, 114550 (3)
PPI	E7_HPV16	VIM	CASP8	607271-601763	279.4	Autoimmune lymphoproliferative syndrome, type IIB, 607271 (3)
PPI	E7_HPV16	VIM	MRPL44	-	-	-
PPI	E7_HPV16	VIM	FABP4	-	-	-
PPI	E7_HPV16	RNF2	CBX4	-	-	-
PPI	E7_HPV16	HSPA5	TMEM62	-	-	-
PPI	E7_HPV16	VIM	STX1A	-	-	-
PPI	E7_HPV16	VIM	MAFG	-	-	-
PPI	E7_HPV16	VIM	TRIM28	-	-	-
PPI	E7_HPV16	TARDBP	NSFL1C	-	-	-
PPI	E7_HPV16	VIM	LOR	602036-152445	270.2	Erythrokeratoderma, progressive symmetric, 602036 (3)
PPI	E7_HPV16	VIM	SDCCAG3	-	-	-
PPI	E7_HPV16	VIM	SIRT6	-	-	-
PPI	E7_HPV16	VIM	TNFRSF14	-	-	-
PPI	E7_HPV16	VIM	IVNS1ABP	-	-	-
PPI	E7_HPV16	PRMT5	PHYHIP	-	-	-
PPI	E7_HPV16	VIM	TTR	L2867-176300	354	Carpal tunnel syndrome, familial (3)
PPI	E7_HPV16	VIM	TTR	L130-176300	277.39	Amyloid neuropathy, familial, several allelic types (3)
PPI	E7_HPV16	VIM	TTR	L432-176300	354	Carpal tunnel syndrome, familial (3)
PPI	E7_HPV16	VIM	TTR	L2766-176300	277.39	Amyloid neuropathy, familial, several allelic types (3)
PPI	E7_HPV16	VIM	SRRT	-	-	-
PPI	E7_HPV16	VIM	MAN2A2	-	-	-
PPI	E7_HPV16	VIM	SH3YL1	-	-	-
PPI	E7_HPV16	VIM	SYN1	300491-313440	345.9	Epilepsy, X-linked, with variable learning disabilities and behavior disorders, 300491 (3)
PPI	E7_HPV16	VIM	SUMO3	-	-	-
PPI	E7_HPV16	TARDBP	SETDB1	-	-	-
PPI	E7_HPV16	VIM	HMG20B	-	-	-
PPI	E7_HPV16	VIM	FUBP1	-	-	-
PPI	E7_HPV16	VIM	CASP8	211980-601763	162.9	Lung cancer, protection against, 211980 (3)
PPI	E7_HPV16	PRMT5	OLA1	-	-	-
PPI	E7_HPV16	EIF3F	EEF1A1	-	-	-
PPI	E7_HPV16	RNF2	SUMO2	-	-	-
PPI	E7_HPV16	VIM	KIF15	-	-	-
PPI	E7_HPV16	TARDBP	ZHX1	-	-	-
PPI	E7_HPV16	VIM	CASP8	114480-601763	239.3	Breast cancer, protection against, 114480 (3)
PPI	E7_HPV16	HSPA8	PHC1	-	-	-
PPI	E7_HPV16	VIM	SERBP1	-	-	-
PPI	E7_HPV16	VIM	TTR	L3631-176300	242.9	Dystransthyretinemic hyperthyroxinemia(3)
PPI	E7_HPV16	VIM	RAD51	114480-179617	239.3	Breast cancer, susceptibility to, 114480 (3)
PPI	E7_HPV16	VIM	TTR	L136-176300	277.39	Amyloidosis, senile systemic (3)
PPI	E7_HPV16	VIM	CRCT1	-	-	-
PPI	E7_HPV16	VIM	CREB1	-	-	-
PPI	E7_HPV16	VIM	C7orf36	-	-	-
PPI	E7_HPV16	EIF4A1	LPPR4	-	-	-
PPI	E7_HPV16	VIM	DPPA4	-	-	-
PPI	E7_HPV16	VIM	RABAC1	-	-	-
PPI	E7_HPV16	VIM	PSME1	-	-	-
PPI	E7_HPV16	VIM	TTR	L870-176300	242.9	Dystransthyretinemic hyperthyroxinemia(3)
PPI	E7_HPV16	VIM	PUF60	-	-	-
PPI	E7_HPV16	CBX4	RNF2	-	-	-
PPI	E7_HPV16	VIM	TRIOBP	609823-609761	-	Deafness, autosomal recessive 28, 609823 (3)
PPI	E7_HPV16	VIM	SLC25A6	-	-	-
PPI	E7_HPV16	VIM	DIS3L2	-	-	-
PPI	E7_HPV16	VIM	CREB1	612160-123810	-	Histiocytoma, angiomatoid fibrous, somatic, 612160 (3)
PPI	E7_HPV16	VIM	BRD1	-	-	-
PPI	E7_HPV16	VIM	TRIOBP	-	-	-
PPI	E7_HPV16	VIM	SUMO2	-	-	-
PPI	E7_HPV16	VIM	TTR	L2768-176300	277.39	Amyloidosis, senile systemic (3)
PPI	E7_HPV16	VIM	NFATC2	-	-	-
PPI	E7_HPV16	VIM	BHLHE40	-	-	-
PPI	E7_HPV16	VIM	LOR	604117-152445	782.8	Vohwinkel syndrome with ichthyosis, 604117 (3)
PPI	E7_HPV16	HSPA8	FBP1	L1053-229700	271.2	Fructose-bisphosphatase deficiency (3)
PPI	E7_HPV16	EIF3F	DKC1	305000-300126	701.1	Dyskeratosis congenita-1, 305000 (3)
PPI	E7_HPV16	HSPA8	COL7A1	132000-120120	757.39	EBD, Bart type, 132000 (3)
PPI	E7_HPV16	SQSTM1	TOE1	-	-	-
PPI	E7_HPV16	DNAJA1	FZR1	-	-	-
PPI	E7_HPV16	EIF3F	PTN	234200-606157	331.9	Neurodegeneration, pantothenate kinase-associated, 234200 (3)
PPI	E7_HPV16	TRIP13	CRMP1	L4336-603850	-	Encephalopahty, lethal, due to defective mitochondrial peroxisomal fission (3)
PPI	E7_HPV16	DNAJA1	TM4SF1	-	-	-
PPI	E7_HPV16	HSPA8	ERH	-	-	-
PPI	E7_HPV16	EIF3F	EIF3M	-	-	-
PPI	E7_HPV16	HSPA8	C4orf14	-	-	-
PPI	E7_HPV16	HSPA8	COL7A1	131750-120120	757.39	Epidermolysis bullosa dystrophica, AD, 131750 (3)
PPI	E7_HPV16	HSPA8	COL7A1	L872-120120	757.39	EBD, localisata variant (3)
PPI	E7_HPV16	HSPA8	FBP1	229700-611570	-	Fructose-1,6-bidphosphatase deficiency, 229700 (3)
PPI	E7_HPV16	HSPA8	COL7A1	226600-120120	757.39	Epidermolysis bullosa dystrophica, AR, 226600 (3)
PPI	E7_HPV16	DNAJA1	ARL4D	-	-	-
PPI	E7_HPV16	TRIP13	CRMP1	-	-	-
PPI	E7_HPV16	HSPA8	COL7A1	131705-120120	757.39	Transient bullous of the newborn, 131705 (3)
PPI	E7_HPV16	HSPA8	COL7A1	L3036-120120	757.39	EBD, localisata variant (3)
PPI	E7_HPV16	CTTN	ANKZF1	-	-	-
PPI	E7_HPV16	COPA	COPE	-	-	-
PPI	E7_HPV16	HSPA8	COL7A1	607523-120120	703.8	Toenail dystrophy, isolated, 607523 (3)
PPI	E7_HPV16	HSPA5	DDX24	-	-	-
PPI	E7_HPV16	PFKL	COPS6	-	-	-
PPI	E7_HPV16	HSPA8	COL7A1	604129-120120	757.39	Epidermolysis bullosa pruriginosa, 604129 (3)
PPI	E7_HPV16	DNAJA1	CD58	-	-	-
PPI	E7_HPV16	HNRNPH1	CRMP1	-	-	-
PPI	E7_HPV16	TUBB2A	CHGB	-	-	-
PPI	E7_HPV16	SQSTM1	MAP1LC3B	-	-	-
PPI	E7_HPV16	HSPA5	PSME3	-	-	-
PPI	E7_HPV16	SQSTM1	SQSTM1	602080-601530	731	Paget disease of bone, 602080 (3)
PPI	E7_HPV16	EIF3F	PTN	242900-606622	756.9	Schimke immunoosseous dysplasia, 242900 (3)
PPI	E7_HPV16	HNRNPH1	CRMP1	L4336-603850	-	Encephalopahty, lethal, due to defective mitochondrial peroxisomal fission (3)
PPI	E7_HPV16	HSPA5	BCAR1	-	-	-
PPI	E7_HPV16	HNRNPH1	TOM1L1	-	-	-
PPI	E7_HPV16	HSPA8	TADA3L	-	-	-
PPI	E7_HPV16	HSPA8	RGS2	L3485-601499	743.44	Rieger syndrome, type 2 (2)
PPI	E7_HPV16	FUS	PRMT1	-	-	-
PPI	E7_HPV16	TUBB2A	RIC8A	-	-	-
PPI	E7_HPV16	COPA	SLC25A11	-	-	-
PPI	E7_HPV16	EIF3F	PTN	607236-606157	272.4	HARP syndrome, 607236 (3)
PPI	E7_HPV16	VIM	VIM	-	-	-
PPI	E7_HPV16	HSPA5	DPYSL5	-	-	-
PPI	E7_HPV16	HSPA8	DPP3	-	-	-
PPI	E7_HPV16	RUVBL2	FDFT1	604271-312865	783.43	Short stature, idiopathic familial, 604271 (3)
PPI	E7_HPV16	RUVBL2	FDFT1	249700-312865	756.59	Langer mesomelic dysplasia, 249700 (3)
PPI	E7_HPV16	RUVBL2	FDFT1	L3618-111740	757.39	Blood group, Ss (3)
PPI	E7_HPV16	HSPA8	TM4SF1	-	-	-
PPI	E7_HPV16	EIF3F	DKC1	300240-300126	742.2	Hoyeraal-Hreidarsson syndrome, 300240 (3)
PPI	E7_HPV16	HSPA8	COL7A1	131850-120120	757.39	Epidermolysis bullosa, pretibial, 131850 (3)
PPI	E7_HPV16	RUVBL2	FDFT1	127300-312865	756.59	Leri-Weill dyschondrosteosis, 127300 (3)
PPI	E7_HPV16	DNAJA1	TH1L	-	-	-
PPI	E7_HPV16	TRIP13	TSSK3	-	-	-
PPI	E7_HPV16	TRIP13	NUBP2	-	-	-
PPI	E7_HPV16	SAP130	MDFI	-	-	-
PPI	E7_HPV16	TRIP13	ACTL7A	-	-	-
PPI	E7_HPV16	STK38	TFCP2	-	-	-
PPI	E7_HPV16	TRIP13	FAM46C	-	-	-
PPI	E7_HPV16	TRIP13	C17orf70	-	-	-
PPI	E7_HPV16	TRIP13	MRPL53	-	-	-
PPI	E7_HPV16	TRIP13	SEMA3B	-	-	-
PPI	E7_HPV16	NFIL3	TRIM23	-	-	-
PPI	E7_HPV16	NFIL3	TRIM27	-	-	-
PPI	E7_HPV16	NFIL3	FBF1	-	-	-
PPI	E7_HPV16	TRIP13	HSD17B8	-	-	-
PPI	E7_HPV16	HNRNPM	TRIM23	-	-	-
PPI	E7_HPV16	TRIP13	NADSYN1	-	-	-
PPI	E7_HPV16	TRIP13	SRGN	-	-	-
PPI	E7_HPV16	TRIP13	EXD3	-	-	-
PPI	E7_HPV16	PRPH	KRT19	-	-	-
PPI	E7_HPV16	TRIP13	NXNL2	-	-	-
PPI	E7_HPV16	SAP130	STAM2	-	-	-
PPI	E7_HPV16	TRIP13	HISPPD1	-	-	-
PPI	E7_HPV16	TRIP13	LRDD	-	-	-
PPI	E7_HPV16	TRIP13	PAFAH1B3	-	-	-
PPI	E7_HPV16	TRIP13	FGF21	-	-	-
PPI	E7_HPV16	TRIP13	APLN	-	-	-
PPI	E7_HPV16	MAP7	CCNDBP1	-	-	-
PPI	E7_HPV16	TRIP13	FNDC3B	-	-	-
PPI	E7_HPV16	TRIP13	NUP37	-	-	-
PPI	E7_HPV16	TRIP13	TPT1	-	-	-
PPI	E7_HPV16	TRIP13	RHOXF2	-	-	-
PPI	E7_HPV16	TRIP13	MAD2L2	-	-	-
PPI	E7_HPV16	TRIP13	LRRC61	-	-	-
PPI	E7_HPV16	TRIP13	STAMBP	-	-	-
PPI	E7_HPV16	TRIP13	CRYBA2	-	-	-
PPI	E7_HPV16	TRIP13	PARP11	-	-	-
PPI	E7_HPV16	TRIP13	MPPED2	-	-	-
PPI	E7_HPV16	RBL1	BEGAIN	-	-	-
PPI	E7_HPV16	RBL1	RBBP8	L3428-604124	157.8	Pancreatic carcinoma, somatic (3)
PPI	E7_HPV16	TFDP2	E2F6	-	-	-
PPI	E7_HPV16	RBL1	RBBP8	L2087-604124	157.8	Pancreatic carcinoma, somatic (3)
PPI	E7_HPV16	RBL1	RBBP8	603649-606629	-	Cone-rod dystrophy 7, 603649 (3)
PPI	E7_HPV16	TFDP1	E2F6	-	-	-
PPI	E7_HPV16	E2F2	BCAR1	-	-	-
PPI	E1_HPV16	UBE2I	PHC1	-	-	-
PPI	E1_HPV16	UBE2I	DACH1	-	-	-
PPI	E1_HPV16	UBE2I	NUDCD3	-	-	-
PPI	E1_HPV16	TRIP13	SMUG1	-	-	-
PPI	E6_HPV16	GPS2	C19orf57	-	-	-
PPI	E6_HPV16	SERTAD1	KLHDC5	-	-	-
PPI	E7_HPV16	DNAJA3	FAM131C	-	-	-
PPI	E1_HPV16	UBE2I	RAD54B	L3253-604289	202.8	Lymphoma, non-Hodgkin (3)
PPI	E1_HPV16	UBE2I	RIPK2	-	-	-
PPI	E1_HPV16	UBE2I	CHMP4B	605387-610897	-	Cataract, posterior polar, 3, 605387 (3)
PPI	E1_HPV16	TRIP13	GALT	230400-606999	271.1	Galactosemia, 230400 (3)
PPI	E1_HPV16	UBE2I	RAD54B	L576-604289	153	Colon adenocarcinoma (3)
PPI	E1_HPV16	UBE2I	IKZF3	-	-	-
PPI	E1_HPV16	UBE2I	ZNF451	-	-	-
PPI	E1_HPV16	TRIP13	ZNF655	-	-	-
PPI	E1_HPV16	UBE2I	RAD54B	L1614-604289	202.8	Lymphoma, non-Hodgkin (3)
PPI	E1_HPV16	TRIP13	SEC24A	-	-	-
PPI	E1_HPV16	UBE2I	PDLIM7	-	-	-
PPI	E1_HPV16	UBE2I	HNRNPC	-	-	-
PPI	E1_HPV16	TRIP13	GPSM1	-	-	-
PPI	E1_HPV16	TRIP13	SEMA4G	-	-	-
PPI	E1_HPV16	TRIP13	PLAC8	-	-	-
PPI	E1_HPV16	TRIP13	LNX1	-	-	-
PPI	E1_HPV16	TRIP13	SELENBP1	-	-	-
PPI	E1_HPV16	UBE2I	SATB1	-	-	-
PPI	E1_HPV16	UBE2I	ZNF646	-	-	-
PPI	E1_HPV16	UBE2I	TRIM29	-	-	-
PPI	E1_HPV16	UBE2I	MAPK1IP1L	-	-	-
PPI	E1_HPV16	TRIP13	GPRIN2	-	-	-
PPI	E1_HPV16	TRIP13	RBPMS	-	-	-
PPI	E1_HPV16	TRIP13	PBLD	-	-	-
PPI	E1_HPV16	UBE2I	C18orf25	-	-	-
PPI	E1_HPV16	UBE2I	HGS	-	-	-
PPI	E1_HPV16	UBE2I	IKZF1	L1510-603023	208.9	Leukemia, acute lymphoblastic (3)
PPI	E1_HPV16	UBE2I	IKZF1	L3200-603023	208.9	Leukemia, acute lymphoblastic (3)
PPI	E1_HPV16	UBE2I	SMAD4	L2082-600993	157.8	Pancreatic cancer (3)
PPI	E1_HPV16	TRIP13	PLK3	-	-	-
PPI	E1_HPV16	TRIP13	SIGLEC5	-	-	-
PPI	E1_HPV16	TRIP13	CARD14	-	-	-
PPI	E1_HPV16	TRIP13	ADAM15	-	-	-
PPI	E1_HPV16	TRIP13	CPSF3L	-	-	-
PPI	E1_HPV16	TRIP13	ASB13	-	-	-
PPI	E1_HPV16	TRIP13	C2orf51	-	-	-
PPI	E1_HPV16	TRIP13	PLSCR3	-	-	-
PPI	E1_HPV16	UBE2I	CHMP4B	-	-	-
PPI	E1_HPV16	UBE2I	SMAD4	175050-600993	448	Juvenile polyposis/hereditary hemorrhagic telangiectasia syndrome, 175050 (3)
PPI	E1_HPV16	UBE2I	SMAD4	L3425-600993	157.8	Pancreatic cancer (3)
PPI	E1_HPV16	TRIP13	STAMBPL1	-	-	-
PPI	E1_HPV16	TRIP13	NME4	-	-	-
PPI	E1_HPV16	UBE2I	PIAS2	-	-	-
PPI	E1_HPV16	UBE2I	HNRNPK	-	-	-
PPI	E1_HPV16	TRIP13	CYB5R2	-	-	-
PPI	E1_HPV16	TRIP13	KRTAP3-2	-	-	-
PPI	E1_HPV16	UBE2I	ZBED1	-	-	-
PPI	E1_HPV16	UBE2I	SMAD4	174900-600993	211.3	Polyposis, juvenile intestinal, 174900 (3)
PPI	E2_HPV16	TP53	DVL2	-	-	-
PPI	E2_HPV16	TP53	MAGEB18	-	-	-
PPI	E6_HPV16	IRF3	PRDX1	-	-	-
PPI	E6_HPV16	TP53	DVL2	-	-	-
PPI	E6_HPV16	GPS2	ATF4	-	-	-
PPI	E6_HPV16	GPS2	C21orf7	-	-	-
PPI	E6_HPV16	MCM7	MBIP	-	-	-
PPI	E6_HPV16	MCM7	RBM8A	-	-	-
PPI	E6_HPV16	TP53	MAGEB18	-	-	-
PPI	E7_HPV16	CDKN1A	CCDC85B	-	-	-
PPI	E7_HPV16	DNAJA3	ZBTB22	-	-	-
PPI	E7_HPV16	CDKN1A	TEX11	-	-	-
PPI	E7_HPV16	CDKN1A	CCND3	-	-	-
PPI	E7_HPV16	PSMC1	CCDC85B	-	-	-
PPI	E7_HPV16	CDKN1A	PCNA	-	-	-
PPI	E7_HPV16	CDKN1A	CCND2	-	-	-
PPI	L2_HPV16	TINAGL1	MDFI	-	-	-
PPI	E7_HPV16	JUNB	NINL	-	-	-
PPI	E1_HPV16	TRIP13	TRIP13	-	-	-
PPI	E1_HPV16	TRIP13	MAD2L1BP	-	-	-
PPI	E1_HPV16	TRIP13	KIAA1609	-	-	-
PPI	E1_HPV16	TRIP13	LASP1	-	-	-
PPI	E1_HPV16	TRIP13	DDAH2	-	-	-
PPI	E1_HPV16	TRIP13	GLYCTK	-	-	-
PPI	E1_HPV16	TRIP13	PARK2	607572-602544	30.9	Leprosy, susceptibility to, 607572 (3)
PPI	E1_HPV16	TRIP13	ARL11	151400-609351	208.9	Leukemia, chronic lymphatic, susceptibility to, 151400 (3)
PPI	E1_HPV16	TRIP13	PLSCR4	-	-	-
PPI	E1_HPV16	TRIP13	PARK2	604370-602544	-	Adenocarcinoma, ovarian, somatic, 604370 (3)
PPI	E1_HPV16	TRIP13	PARK2	600116-602544	332	Parkinson disease, juvenile, type 2, 600116 (3)
PPI	E1_HPV16	TRIP13	HDHD3	-	-	-
PPI	E1_HPV16	TRIP13	LOXL4	-	-	-
PPI	E1_HPV16	TRIP13	DTX2	-	-	-
PPI	E1_HPV16	TRIP13	PPP2CA	-	-	-
PPI	E1_HPV16	TRIP13	WDYHV1	-	-	-
PPI	E1_HPV16	TRIP13	COMT	167870-116790	-	Panic disorder, susceptibility to, 167870 (3)
PPI	E1_HPV16	TRIP13	NIF3L1	-	-	-
PPI	E1_HPV16	TRIP13	COMT	181500-116790	295.9	Schizophrenia, susceptibility to, 181500 (3)
PPI	E1_HPV16	TRIP13	PARK2	211980-602544	-	Adenocarcinoma of lung, somatic, 211980 (3)
PPI	E1_HPV16	TRIP13	C11orf54	-	-	-
PPI	E6_HPV16	BAK1	BCL2L1	-	-	-
PPI	E7_HPV16	PSMC1	PSMD2	-	-	-
PPI	E7_HPV16	PPP2CA	TRIP13	-	-	-
PPI	E6_HPV16	MAGI1	GBP2	-	-	-
PPI	E6_HPV16	GPS2	CHD3	-	-	-
PPI	E7_HPV16	SIVA1	GRINL1A	-	-	-
PPI	E2_HPV16	TP53	FAM173A	-	-	-
PPI	E2_HPV16	TP53	SNRPN	176270-182279	759.81	Prader-Willi syndrome, 176270 (3)
PPI	E2_HPV16	TP53	TP53BP1	-	-	-
PPI	E2_HPV16	TP53	PPA1	-	-	-
PPI	E2_HPV16	TP53	TMSB4X	-	-	-
PPI	E2_HPV16	TP53	HSPB1	608634-602195	355.9	Neuropathy, distal hereditary motor, 608634 (3)
PPI	E2_HPV16	BRD4	C7orf25	-	-	-
PPI	E2_HPV16	TP53	HSPB1	606595-602195	356.1	Charcot-Marie-Tooth disease, axonal, type 2F, 606595 (3)
PPI	E2_HPV16	TP53	CCDC106	-	-	-
PPI	E6_HPV16	TP53	TP53BP1	-	-	-
PPI	E6_HPV16	TP53	PPA1	-	-	-
PPI	E6_HPV16	FADD	LRRCC1	-	-	-
PPI	E6_HPV16	TP53	SNRPN	176270-182279	759.81	Prader-Willi syndrome, 176270 (3)
PPI	E6_HPV16	TP53	CCDC106	-	-	-
PPI	E6_HPV16	TP53	HSPB1	608634-602195	355.9	Neuropathy, distal hereditary motor, 608634 (3)
PPI	E6_HPV16	EP300	COPS6	-	-	-
PPI	E6_HPV16	TP53	HSPB1	606595-602195	356.1	Charcot-Marie-Tooth disease, axonal, type 2F, 606595 (3)
PPI	E6_HPV16	TP53	FAM173A	-	-	-
PPI	E6_HPV16	TP53	TMSB4X	-	-	-
PPI	E6_HPV16	FBLN1	MOBKL3	-	-	-
PPI	E7_HPV16	EP300	COPS6	-	-	-
PPI	E7_HPV16	CDKN1A	TTLL5	-	-	-
PPI	E7_HPV16	CDKN1A	C1orf123	-	-	-
PPI	E1_HPV16	TRIP13	CRMP1	L4336-603850	-	Encephalopahty, lethal, due to defective mitochondrial peroxisomal fission (3)
PPI	E1_HPV16	TRIP13	CRMP1	-	-	-
PPI	E1_HPV16	UBE2I	UNC119	-	-	-
PPI	E2_HPV16	TP53	WDR33	-	-	-
PPI	E2_HPV16	TP53	NP	L1965-164050	334.3	Nucleoside phosphorylase deficiency, immunodeficiency due to (3)
PPI	E2_HPV16	TP53	RAB4A	-	-	-
PPI	E2_HPV16	TP53	ARIH2	-	-	-
PPI	E2_HPV16	TP53	ARL3	-	-	-
PPI	E2_HPV16	TP53	BCR	L1512-151410	208.9	Leukemia, acute lymphocytic (3)
PPI	E2_HPV16	TP53	BCR	L3202-151410	208.9	Leukemia, acute lymphocytic (3)
PPI	E2_HPV16	TP53	NP	L3394-164050	334.3	Nucleoside phosphorylase deficiency, immunodeficiency due to (3)
PPI	E2_HPV16	TP53	THAP8	-	-	-
PPI	E2_HPV16	TP53	2010-06-01	-	-	-
PPI	E2_HPV16	TP53	ANXA3	-	-	-
PPI	E2_HPV16	TP53	SULT1E1	-	-	-
PPI	E2_HPV16	TP53	2010-06-01	308800-313020	-	Keratosis follicularis spinulosa decalvans, 308800 (3)
PPI	E2_HPV16	TP53	CCL18	-	-	-
PPI	E2_HPV16	TP53	CDKN2C	-	-	-
PPI	E2_HPV16	TP53	PAFAH1B3	-	-	-
PPI	E2_HPV16	TP53	ERH	-	-	-
PPI	E2_HPV16	TP53	BTBD2	-	-	-
PPI	E2_HPV16	TP53	TK1	-	-	-
PPI	E2_HPV16	BRD4	CLDN1	607626-603718	757.1	Neonatal ichthyosis-sclerosing cholangitis syndrome, 607626 (3)
PPI	E2_HPV16	TP53	LAMA4	-	-	-
PPI	E2_HPV16	TP53	SERPINB9	-	-	-
PPI	E2_HPV16	TP53	STX5	-	-	-
PPI	E2_HPV16	TP53	PCDHA4	-	-	-
PPI	E2_HPV16	TP53	COX17	-	-	-
PPI	E2_HPV16	TP53	MPHOSPH6	-	-	-
PPI	E2_HPV16	TP53	MAD2L1BP	-	-	-
PPI	E2_HPV16	TP53	S100A8	117800-607040	-	Earwax, wet/dry, 117800 (3)
PPI	E2_HPV16	TP53	BCR	608232-151410	208.9	Leukemia, chronic myeloid, 608232 (3)
PPI	E2_HPV16	TP53	ZNF24	-	-	-
PPI	E2_HPV16	TP53	CCT5	-	-	-
PPI	E2_HPV16	TP53	FXYD6	-	-	-
PPI	E2_HPV16	BRD4	CHFR	-	-	-
PPI	E2_HPV16	TP53	EIF2S2	-	-	-
PPI	E2_HPV16	TP53	ZCCHC10	-	-	-
PPI	E2_HPV16	TP53	CCT5	256840-610150	-	Neuropathy, hereditary sensory, with spastic paraplegia, 256840 (3)
PPI	E2_HPV16	TBP	WDR62	-	-	-
PPI	E2_HPV16	TP53	PSMD11	-	-	-
PPI	E2_HPV16	TP53	GSTM4	-	-	-
PPI	E2_HPV16	TP53	CDC42	-	-	-
PPI	E2_HPV16	TP53	S100A8	-	-	-
PPI	E6_HPV16	TAX1BP3	TCEA2	-	-	-
PPI	E6_HPV16	TP53	SULT1E1	-	-	-
PPI	E6_HPV16	GPS2	CCDC99	-	-	-
PPI	E6_HPV16	TP53	NP	L1965-164050	334.3	Nucleoside phosphorylase deficiency, immunodeficiency due to (3)
PPI	E6_HPV16	TP53	ERH	-	-	-
PPI	E6_HPV16	TP53	ARIH2	-	-	-
PPI	E6_HPV16	TP53	MPHOSPH6	-	-	-
PPI	E6_HPV16	TP53	PAFAH1B3	-	-	-
PPI	E6_HPV16	TP53	PCDHA4	-	-	-
PPI	E6_HPV16	TP53	ZCCHC10	-	-	-
PPI	E6_HPV16	TP53	ANXA3	-	-	-
PPI	E6_HPV16	TP53	BCR	608232-151410	208.9	Leukemia, chronic myeloid, 608232 (3)
PPI	E6_HPV16	TP53	COX17	-	-	-
PPI	E6_HPV16	TP53	LAMA4	-	-	-
PPI	E6_HPV16	TP53	STX5	-	-	-
PPI	E6_HPV16	TP53	ZNF24	-	-	-
PPI	E6_HPV16	GPS2	PBK	-	-	-
PPI	E6_HPV16	TP53	MAD2L1BP	-	-	-
PPI	E6_HPV16	TP53	CDC42	-	-	-
PPI	E6_HPV16	TP53	S100A8	117800-607040	-	Earwax, wet/dry, 117800 (3)
PPI	E6_HPV16	GPS2	GOLGA2	-	-	-
PPI	E6_HPV16	RCN2	BAT3	-	-	-
PPI	E6_HPV16	TP53	THAP8	-	-	-
PPI	E6_HPV16	TP53	BCR	L1512-151410	208.9	Leukemia, acute lymphocytic (3)
PPI	E6_HPV16	TP53	GSTM4	-	-	-
PPI	E6_HPV16	TP53	SERPINB9	-	-	-
PPI	E6_HPV16	TP53	BTBD2	-	-	-
PPI	E6_HPV16	GPS2	SETDB1	-	-	-
PPI	E6_HPV16	TP53	CDKN2C	-	-	-
PPI	E6_HPV16	TP53	CCT5	256840-610150	-	Neuropathy, hereditary sensory, with spastic paraplegia, 256840 (3)
PPI	E6_HPV16	TP53	RAB4A	-	-	-
PPI	E6_HPV16	TP53	2010-06-01	-	-	-
PPI	E6_HPV16	TP53	2010-06-01	308800-313020	-	Keratosis follicularis spinulosa decalvans, 308800 (3)
PPI	E6_HPV16	TP53	ARL3	-	-	-
PPI	E6_HPV16	TP53	CCL18	-	-	-
PPI	E6_HPV16	TP53	FXYD6	-	-	-
PPI	E6_HPV16	TP53	TK1	-	-	-
PPI	E6_HPV16	TP53	NP	L3394-164050	334.3	Nucleoside phosphorylase deficiency, immunodeficiency due to (3)
PPI	E6_HPV16	TP53	BCR	L3202-151410	208.9	Leukemia, acute lymphocytic (3)
PPI	E6_HPV16	TP53	PSMD11	-	-	-
PPI	E6_HPV16	TP53	CCT5	-	-	-
PPI	E6_HPV16	FADD	DDX24	-	-	-
PPI	E6_HPV16	FADD	MOBKL3	-	-	-
PPI	E6_HPV16	TP53	WDR33	-	-	-
PPI	E6_HPV16	TP53	EIF2S2	-	-	-
PPI	E6_HPV16	TP53	S100A8	-	-	-
PPI	E7_HPV16	RAN	KIAA1377	-	-	-
PPI	E7_HPV16	HDAC1	TPD52L1	-	-	-
PPI	E7_HPV16	PPP2CA	PTN	607236-606157	272.4	HARP syndrome, 607236 (3)
PPI	E7_HPV16	PKM2	OLFM2	-	-	-
PPI	E7_HPV16	CDKN1A	GNB2L1	-	-	-
PPI	E7_HPV16	CDKN1A	HDAC11	-	-	-
PPI	E7_HPV16	PPP2CA	PTN	242900-606622	756.9	Schimke immunoosseous dysplasia, 242900 (3)
PPI	E7_HPV16	SNW1	ASCC2	-	-	-
PPI	E7_HPV16	CDKN1A	ITGB1BP3	-	-	-
PPI	E7_HPV16	RPS25	SGSM2	-	-	-
PPI	E7_HPV16	PPP2CA	PTN	234200-606157	331.9	Neurodegeneration, pantothenate kinase-associated, 234200 (3)
PPI	E7_HPV16	CDKN1A	RAB1A	-	-	-
PPI	E7_HPV16	PPP2CA	MRPS26	-	-	-
PPI	E7_HPV16	CDKN1A	C7orf20	-	-	-
PPI	E7_HPV16	RPS25	HAP1	-	-	-
PPI	E7_HPV16	TBP	WDR62	-	-	-
PPI	E7_HPV16	PPP2R1A	ARIH2	-	-	-
PPI	E7_HPV16	PPP2CA	ISYNA1	-	-	-
PPI	E7_HPV16	CDKN1A	SLC25A11	-	-	-
PPI	L2_HPV16	TINAGL1	MED31	-	-	-
PPI	L2_HPV16	TINAGL1	UTP14A	-	-	-
PPI	E7_HPV16	RAN	NELF	146110-608137	253.4	Hypogonadotropic hypogonadism, 146110 (3)
PPI	E7_HPV16	JUNB	FOSL1	-	-	-
PPI	E2_HPV16	TP53	ATF3	-	-	-
PPI	E6_HPV16	TP53	ATF3	-	-	-
PPI	E1_HPV16	TRIP13	EXD3	-	-	-
PPI	E1_HPV16	TRIP13	NUP37	-	-	-
PPI	E1_HPV16	TRIP13	PAFAH1B3	-	-	-
PPI	E1_HPV16	TRIP13	SRGN	-	-	-
PPI	E1_HPV16	TRIP13	NADSYN1	-	-	-
PPI	E1_HPV16	TRIP13	NUBP2	-	-	-
PPI	E1_HPV16	TRIP13	FNDC3B	-	-	-
PPI	E1_HPV16	TRIP13	NXNL2	-	-	-
PPI	E1_HPV16	TRIP13	HSD17B8	-	-	-
PPI	E1_HPV16	TRIP13	LRDD	-	-	-
PPI	E1_HPV16	TRIP13	ACTL7A	-	-	-
PPI	E1_HPV16	TRIP13	FGF21	-	-	-
PPI	E1_HPV16	TRIP13	TPT1	-	-	-
PPI	E1_HPV16	TRIP13	FAM46C	-	-	-
PPI	E1_HPV16	TRIP13	TSSK3	-	-	-
PPI	E1_HPV16	TRIP13	MRPL53	-	-	-
PPI	E1_HPV16	TRIP13	APLN	-	-	-
PPI	E1_HPV16	TRIP13	C17orf70	-	-	-
PPI	E1_HPV16	TRIP13	HISPPD1	-	-	-
PPI	E1_HPV16	TRIP13	SEMA3B	-	-	-
PPI	E6_HPV16	MCM7	POLR2C	-	-	-
PPI	E7_HPV16	DNAJA3	IL16	-	-	-
PPI	E7_HPV16	FOS	MDFI	-	-	-
PPI	E7_HPV16	DNAJA3	ZNF408	-	-	-
PPI	E7_HPV16	DNAJA3	BYSL	-	-	-
PPI	E7_HPV16	FOS	SERPINA5	-	-	-
PPI	E7_HPV16	DNAJA3	WDYHV1	-	-	-
PPI	E7_HPV16	DNAJA3	GEM	-	-	-
PPI	E7_HPV16	FOS	SERPINA5	L4952-601841	-	Protein C inhibitor deficiency (2)
PPI	E1_HPV16	TRIP13	RHOXF2	-	-	-
PPI	E1_HPV16	TRIP13	MAD2L2	-	-	-
PPI	E1_HPV16	TRIP13	LRRC61	-	-	-
PPI	E1_HPV16	TRIP13	CRYBA2	-	-	-
PPI	E1_HPV16	TRIP13	MPPED2	-	-	-
PPI	E1_HPV16	TRIP13	PARP11	-	-	-
PPI	E1_HPV16	TRIP13	STAMBP	-	-	-
PDI	E7_HPV16	TEAD4	MYH7	L2857-160760	425.4	Cardiomyopathy, dilated, 1S (3)
PDI	E7_HPV16	TEAD4	MYH7	L460-160760	359	Central core disease, one form (3) ()
PDI	E7_HPV16	TEAD4	MYH7	192600-160760	425.4	Cardiomyopathy, familial hypertrophic, 1, 192600 (3)
PDI	E7_HPV16	TEAD4	MYH7	608358-160760	359.9	Myopathy, myosin storage, 608358 (3)
PDI	E7_HPV16	TEAD4	MYH7	160500-160760	359.9	Myopathy, Laing distal, 160500 (3)
PDI	E7_HPV16	TEAD4	MYH7	115200-160760	425.4	Cardiomyopathy, dilated, 115200 (3)
PDI	E7_HPV16	TEAD4	MYH7	181430-160760	-	Scapuloperoneal syndrome, myopathic type, 181430 (3)
PDI	E7_HPV16	NCOA1	HOXA10	-	-	-
PDI	E7_HPV16	E2F1	CDC25A	-	-	-
PDI	E7_HPV16	E2F1	BCL2	L3228-151430	208.9	Leukemia/lymphoma, B-cell, 2 (3)
PDI	E7_HPV16	E2F1	BCL2	L1543-151430	208.9	Leukemia/lymphoma, B-cell, 2 (3)
PDI	E7_HPV16	E2F1	CYC1	-	-	-
PDI	E7_HPV16	E2F4	CDC2	-	-	-
PDI	E7_HPV16	E2F1	E2F1	-	-	-
PDI	E7_HPV16	E2F4	PCNA	-	-	-
PDI	E2_HPV16	TP53	MSH2	276300-609309	-	Mismatch repair cancer syndrome, 276300 (3)
PDI	E2_HPV16	TP53	SERPINB5	-	-	-
PDI	E2_HPV16	TP53	MSH2	137800-609309	191.9	Glioblastoma, early-onset, 137800 (3)
PDI	E2_HPV16	TP53	TGFA	-	-	-
PDI	E2_HPV16	TP53	MSH2	L1618-609309	202.8	Lymphoma, T-cell (3)
PDI	E2_HPV16	CEBPB	ICAM1	L1639-147840	84.6	Malaria, cerebral, susceptibility to (3)
PDI	E2_HPV16	CEBPB	SOX6	-	-	-
PDI	E2_HPV16	TP53	APC	L2740-611731	211.4	Adenoma, periampullary (3)
PDI	E2_HPV16	TP53	MSH2	120435-609309	153	Colorectal cancer, hereditary nonpolyposis, type 1, 120435 (3)
PDI	E2_HPV16	TP53	TNFRSF10B	601400-603612	173.9	Squamous cell carcinoma, head and neck, 601400 (3)
PDI	E2_HPV16	CEBPA	ALOX5AP	L1855-603700	410.9	Myocardial infarction, susceptibility to (3)
PDI	E2_HPV16	CEBPA	TF	L3835-190000	285.9	Iron deficiency anemia, susceptibility to (3)
PDI	E2_HPV16	TP53	MSH2	114030-609309	709.09	Cafe-au-lait spots, multiple, with leukemia, 114030 (3)
PDI	E2_HPV16	TP53	MSH2	L2053-609309	183	Ovarian cancer (3)
PDI	E2_HPV16	CEBPA	IL10	L1246-124092	42	HIV-1, susceptibility to (3)
PDI	E2_HPV16	CEBPA	IL10	142946-602630	742.2	Holoprosencephaly-4, 142946 (3)
PDI	E2_HPV16	TP53	MSH2	114400-609309	V84.01	Lynch cancer family syndrome II, 114400 (3)
PDI	E2_HPV16	CEBPB	TOP1	L4278-126420	-	DNA topoisomerase I, camptothecin-resistant (3)
PDI	E2_HPV16	CEBPA	LTF	-	-	-
PDI	E2_HPV16	CEBPB	CRP	-	-	-
PDI	E2_HPV16	CEBPA	APOA2	143890-107670	272	Hypercholesterolemia, familial, modification of, 143890 (3)
PDI	E2_HPV16	CEBPA	APOA2	L183-107670	281.4	Apolipoprotein A-II deficiency (3)
PDI	E2_HPV16	CEBPA	CETP	607322-118470	260	CETP deficiency, 607322 (3)
PDI	E2_HPV16	CEBPA	F9	306900-300746	-	Hemophilia B, 306900 (3)
PDI	E2_HPV16	TP53	MSH2	158320-609309	706.2	Muir-Torre syndrome, 158320 (3)
PDI	E2_HPV16	CEBPA	ALOX5AP	601367-603700	434.91	Stroke, susceptibility to, 601367 (3)
PDI	E2_HPV16	CEBPA	PPARG	L3648-601487	278	Obesity, resistance to (3)
PDI	E2_HPV16	CEBPA	CRP	-	-	-
PDI	E2_HPV16	TP53	MDM2	L3666-164785	216.9	Accelerated tumor formation, susceptibility to (3)
PDI	E2_HPV16	CEBPB	S100A9	-	-	-
PDI	E2_HPV16	CEBPA	TF	209300-190000	273.8	Atransferrinemia, 209300 (3)
PDI	E2_HPV16	TP53	CX3CL1	-	-	-
PDI	E2_HPV16	CEBPB	SLC19A1	-	-	-
PDI	E2_HPV16	TP53	MMP2	277950-120360	-	Winchester syndrome, 277950 (2)
PDI	E2_HPV16	CEBPB	CCL5	L1244-187011	42	HIV-1 disease, delayed progression of (3)
PDI	E2_HPV16	CEBPB	CCL5	L1245-187011	42	HIV-1 disease, rapid progression of (3)
PDI	E2_HPV16	TP53	SFN	-	-	-
PDI	E2_HPV16	TP53	CD82	176807-600623	185	Prostate cancer, susceptibility to, 176807 (2)
PDI	E2_HPV16	CEBPA	PPARG	137800-601487	191.9	Glioblastoma, susceptibility to, 137800 (3)
PDI	E2_HPV16	CEBPA	IVL	-	-	-
PDI	E2_HPV16	TBP	TGFA	-	-	-
PDI	E2_HPV16	CEBPB	CCL5	L3817-187011	42	HIV-1 disease, rapid progression of (3)
PDI	E2_HPV16	CEBPB	ABCB1	612244-171050	-	Inflammatory bowel disease 13, susceptibility to, 612244 (3)
PDI	E2_HPV16	TP53	APAF1	-	-	-
PDI	E2_HPV16	CEBPB	IL6	L5396-147620	-	Intracranial hemorrhage in brain cerebrovascular malformations, susceptibility to (3)
PDI	E2_HPV16	CEBPB	ABCB1	L571-171050	974.7	Colchicine resistance (3)
PDI	E2_HPV16	TP53	PCNA	-	-	-
PDI	E2_HPV16	CEBPA	CSF1	-	-	-
PDI	E2_HPV16	TBP	PADI3	-	-	-
PDI	E2_HPV16	TP53	DKK1	-	-	-
PDI	E2_HPV16	TP53	FANCC	L1020-227645	284.09	Fanconi anemia, complementation group C (3)
PDI	E2_HPV16	CEBPB	SPINK1	L3806-167790	577.8	Fibrocalculous pancreatic diabetes, susceptibility to (3)
PDI	E2_HPV16	TP53	APC	L4479-611731	-	Hepatoblastoma (3)
PDI	E2_HPV16	TP53	APC	601214-173325	425.4	Naxos disease, 601214 (3)
PDI	E2_HPV16	TP53	TP63	605289-603273	755.67	Split-hand/foot malformation, type 4, 605289 (3)
PDI	E2_HPV16	CEBPA	ICAM1	L1639-147840	84.6	Malaria, cerebral, susceptibility to (3)
PDI	E2_HPV16	CEBPA	PPARG	604367-601487	250	Insulin resistance, severe, digenic, 604367 (3)
PDI	E2_HPV16	TP53	FANCC	L3079-227645	284.09	Fanconi anemia, complementation group C (3)
PDI	E2_HPV16	TP53	APC	L3095-611731	287.2	Gardner syndrome (3)
PDI	E2_HPV16	TP53	APC	276300-175100	211.3	Turcot syndrome, 276300 (3)
PDI	E2_HPV16	TP53	APC	137215-611731	151.9	Gastric cancer, somatic, 137215 (3)
PDI	E2_HPV16	TP53	TP53INP1	-	-	-
PDI	E2_HPV16	TP53	CHEK1	-	-	-
PDI	E2_HPV16	TP53	TP63	603543-603273	755.5	Limb-mammary syndrome, 603543 (3)
PDI	E2_HPV16	TP53	IGFBP3	-	-	-
PDI	E2_HPV16	TP53	EGFR	211980-131550	162.9	Nonsmall cell lung cancer, response to tyrosine kinase inhibitor in, 211980 (3)
PDI	E2_HPV16	CEBPA	IL10	L3808-124092	996.85	Graft-versus-host disease, protection against (3)
PDI	E2_HPV16	CEBPB	SAA2	-	-	-
PDI	E2_HPV16	CEBPB	TOP1	-	-	-
PDI	E2_HPV16	TP53	BAX	L597-600040	153	Colorectal cancer (3)
PDI	E2_HPV16	TP53	PTK2	-	-	-
PDI	E2_HPV16	CEBPA	CETP	152430-118470	-	Longevity, exceptional, 152430 (3)
PDI	E2_HPV16	TP53	MMP2	605156-120360	733.9	Osteolysis, idiopathic, Saudi type, 605156 (3)
PDI	E2_HPV16	TBP	DHFR	L2771-126060	285.9	Anemia, megaloblastic, due to DHFR deficiency (1) ()
PDI	E2_HPV16	CEBPA	IL10	L3818-124092	42	HIV-1, susceptibility to (3)
PDI	E2_HPV16	CEBPA	CETP	143470-118470	272.9	Hyperalphalipoproteinemia, 143470 (3)
PDI	E2_HPV16	CEBPA	CETP	L3633-118470	286.9	High density lipoprotein cholesterol level QTL 10 (3)
PDI	E2_HPV16	TP53	S100A2	-	-	-
PDI	E2_HPV16	CEBPB	IL6	222100-147620	250	Diabetes, susceptibility to, 222100, 125853 (3)
PDI	E2_HPV16	CEBPB	IL6	604302-147620	714	Rheumatoid arthritis, systemic juvenile, 604302 (3)
PDI	E2_HPV16	TP53	SESN1	-	-	-
PDI	E2_HPV16	CEBPA	TF	L1434-190000	285.9	Iron deficiency anemia, susceptibility to (3)
PDI	E2_HPV16	TP53	MSH2	162200-609309	237.7	Neurofibromatosis, type I, with leukemia, 162200 (3)
PDI	E2_HPV16	TP53	APC	L42-175100	211.4	Adenoma, periampullary (3)
PDI	E2_HPV16	TP53	APC	137215-175100	151.9	Gastric cancer, 137215 (3)
PDI	E2_HPV16	TP53	APC	135290-611731	171.9	Desmoid disease, hereditary, 135290 (3)
PDI	E2_HPV16	TP53	APC	175100-611731	-	Adenomatous polyposis coli, 175100 (3)
PDI	E2_HPV16	TP53	APC	135290-175100	171.9	Desmoid disease, hereditary, 135290 (3)
PDI	E2_HPV16	TP53	APC	611528-173325	-	Arrhythmogenic right ventricular dysplasia, familial, 12, 611528 (3)
PDI	E2_HPV16	TP53	DDB2	278740-600811	757.33	Xeroderma pigmentosum, group E, DDB-negative subtype, 278740 (3)
PDI	E2_HPV16	CEBPA	ALOX5AP	L3887-603700	410.9	Myocardial infarction, susceptibility to (3)
PDI	E2_HPV16	CEBPA	S100A9	-	-	-
PDI	E2_HPV16	TP53	APC	L4128-611731	-	Brain tumor-polyposis syndrome 2 (3)
PDI	E2_HPV16	CEBPB	BCL2A1	-	-	-
PDI	E2_HPV16	TP53	APC	114500-611731	153	Colorectal cancer, somatic, 114500 (3)
PDI	E2_HPV16	CEBPB	TNFAIP6	-	-	-
PDI	E2_HPV16	CEBPB	MEFV	249100-608107	277.31	Familial Mediterranean fever, 249100 (3)
PDI	E2_HPV16	CEBPA	CYP3A4	-	-	-
PDI	E2_HPV16	CEBPB	IL10	605389-602630	-	Hypotrichosis simplex, contiguous gene syndrome with, 605389 (2)
PDI	E2_HPV16	CEBPA	F9	188550-601985	193	Thyroid papillary carcinoma, 188550 (1)
PDI	E2_HPV16	CEBPB	IL10	142946-602630	742.2	Holoprosencephaly-4, 142946 (3)
PDI	E2_HPV16	CEBPB	HOXD13	186000-142989	755.1	Synpolydactyly with foot anomalies, 186000 (3)
PDI	E2_HPV16	TP53	TNFRSF10C	-	-	-
PDI	E2_HPV16	CEBPA	IL10	605389-602630	-	Hypotrichosis simplex, contiguous gene syndrome with, 605389 (2)
PDI	E2_HPV16	TP53	APC	L1066-175100	287.2	Gardner syndrome (3)
PDI	E2_HPV16	TP53	BAX	L2555-600040	204	T-cell acute lymphoblastic leukemia (3)
PDI	E2_HPV16	CEBPB	HOXD13	113300-142989	755.5	Brachydactyly, type E, 113300 (3)
PDI	E2_HPV16	CEBPA	APOB	144010-107730	272	Hypercholesterolemia, due to ligand-defective apo B, 144010 (3)
PDI	E2_HPV16	TP53	RFWD2	-	-	-
PDI	E2_HPV16	CEBPB	IL10	180300-124092	714	Rheumatoid arthritis, progression of, 180300 (3)
PDI	E2_HPV16	CEBPB	HOXD13	113200-142989	755.5	Brachydactyly, type D, 113200 (3)
PDI	E2_HPV16	CEBPB	IL10	L3808-124092	996.85	Graft-versus-host disease, protection against (3)
PDI	E2_HPV16	CEBPA	APOB	L17-107730	272.5	Abetalipoproteinemia (3)
PDI	E2_HPV16	TP53	BAX	L2921-600040	153	Colorectal cancer (3)
PDI	E2_HPV16	TP53	TP63	604292-603273	755.4	Ectrodactyly, ectodermal dysplasia, and cleft lip/palate syndrome 3, 604292 (3)
PDI	E2_HPV16	TP53	GADD45A	-	-	-
PDI	E2_HPV16	TP53	BBC3	-	-	-
PDI	E2_HPV16	TP53	TP53AIP1	-	-	-
PDI	E2_HPV16	TP53	NDRG1	601455-605262	356.1	Charcot-Marie-Tooth disease, type 4D, 601455 (3)
PDI	E2_HPV16	CEBPB	CCL5	L3816-187011	42	HIV-1 disease, delayed progression of (3)
PDI	E2_HPV16	CEBPB	IL10	L1149-124092	996.85	Graft-versus-host disease, protection against (3)
PDI	E2_HPV16	CEBPB	IL1B	137215-147720	151.9	Gastric cancer risk after H. pylori infection, 137215 (3)
PDI	E2_HPV16	CEBPB	IL18BP	-	-	-
PDI	E2_HPV16	CEBPB	SPINK1	608189-167790	251.8	Tropical calcific pancreatitis, 608189 (3)
PDI	E2_HPV16	CEBPB	IL10	L3818-124092	42	HIV-1, susceptibility to (3)
PDI	E2_HPV16	TP53	TRIM22	-	-	-
PDI	E2_HPV16	CEBPB	SPINK1	L1034-167790	577.8	Fibrocalculous pancreatic diabetes, susceptibility to (3)
PDI	E2_HPV16	TP53	TP63	129400-603273	757.31	Rapp-Hodgkin syndrome, 129400 (3)
PDI	E2_HPV16	CEBPA	PPARG	151660-601487	272.6	Lipodystrophy, familial partial, 151660 (3)
PDI	E2_HPV16	TP53	APC	L596-175100	153	Colorectal cancer (3)
PDI	E2_HPV16	CEBPB	IL10	L1246-124092	42	HIV-1, susceptibility to (3)
PDI	E2_HPV16	CEBPB	IL6	148000-147620	176.9	Kaposi sarcoma, susceptibility to, 148000 (3)
PDI	E2_HPV16	CEBPA	F9	L2689-306900	995.2	Warfarin sensitivity (3)
PDI	E2_HPV16	TBP	GFAP	203450-137780	781.99	Alexander disease, 203450 (3)
PDI	E2_HPV16	CEBPA	PSMD4	-	-	-
PDI	E2_HPV16	CEBPA	APOB	L1343-107730	272.5	Hypobetalipoproteinemia (3)
PDI	E2_HPV16	CEBPA	IL10	L1149-124092	996.85	Graft-versus-host disease, protection against (3)
PDI	E2_HPV16	TP53	TP63	103285-603273	757.8	ADULT syndrome, 103285 (3)
PDI	E2_HPV16	CEBPA	PPARG	601665-601487	278	Obesity, severe, 601665 (3)
PDI	E2_HPV16	CEBPA	IL10	180300-124092	714	Rheumatoid arthritis, progression of, 180300 (3)
PDI	E2_HPV16	TP53	CASP1	-	-	-
PDI	E2_HPV16	CEBPA	PPARG	604367-601487	277.7	Insulin resistance, severe, digenic, 604367 (3)
PDI	E2_HPV16	CEBPB	IL6	266600-147620	555.9	Crohn disease-associated growth failure, 266600 (3)
PDI	E2_HPV16	CEBPA	PPARG	L1974-601487	278	Obesity, resistance to (3)
PDI	E2_HPV16	TP53	PTTG1	-	-	-
PDI	E2_HPV16	TP53	DUSP1	-	-	-
PDI	E2_HPV16	TP53	SCN3B	-	-	-
PDI	E2_HPV16	TP53	TP63	106260-603273	374.46	Hay-Wells syndrome, 106260 (3)
PDI	E2_HPV16	TP53	TP73	L3379-601990	194	Neuroblastoma (1) ()
PDI	E2_HPV16	CEBPA	F9	171200-607751	-	Phenylthiocarbamide tasting, 171200 (3)
PDI	E2_HPV16	CEBPA	PPARG	609830-601487	-	Abdominal body fat distribution, modifier of, 609830 (3)
PDI	E2_HPV16	CEBPA	F9	L1204-306900	286	Hemophilia B (3)
PDI	E2_HPV16	TP53	MDM2	L20-164785	216.9	Accelerated tumor formation, susceptibility to (3)
PDI	E2_HPV16	CEBPB	SPINK1	167800-167790	577	Pancreatitis, hereditary, 167800 (3)
PDI	E6_HPV16	TP53	APC	601214-173325	425.4	Naxos disease, 601214 (3)
PDI	E6_HPV16	TP53	TNFRSF10C	-	-	-
PDI	E6_HPV16	TP53	APC	137215-175100	151.9	Gastric cancer, 137215 (3)
PDI	E6_HPV16	TP53	TRIM22	-	-	-
PDI	E6_HPV16	TP53	APC	175100-611731	-	Adenomatous polyposis coli, 175100 (3)
PDI	E6_HPV16	TP53	EGFR	211980-131550	162.9	Nonsmall cell lung cancer, response to tyrosine kinase inhibitor in, 211980 (3)
PDI	E6_HPV16	TP53	APC	L3095-611731	287.2	Gardner syndrome (3)
PDI	E6_HPV16	TP53	SCN3B	-	-	-
PDI	E6_HPV16	TP53	DKK1	-	-	-
PDI	E6_HPV16	TP53	MSH2	276300-609309	-	Mismatch repair cancer syndrome, 276300 (3)
PDI	E6_HPV16	TP53	APC	L4479-611731	-	Hepatoblastoma (3)
PDI	E6_HPV16	TP53	BBC3	-	-	-
PDI	E6_HPV16	TP53	APC	276300-175100	211.3	Turcot syndrome, 276300 (3)
PDI	E6_HPV16	IRF3	IRF7	-	-	-
PDI	E6_HPV16	MYC	ERBB2	137215-164870	151.9	Gastric cancer, somatic, 137215 (3)
PDI	E6_HPV16	TP53	TP73	L3379-601990	194	Neuroblastoma (1) ()
PDI	E6_HPV16	TP53	CHEK1	-	-	-
PDI	E6_HPV16	MYC	ERBB2	L3415-164870	183	Ovarian cancer, somatic, (3)
PDI	E6_HPV16	TP53	DUSP1	-	-	-
PDI	E6_HPV16	MYC	ERBB2	137800-164870	191.9	Glioblastoma, somatic, 137800 (3)
PDI	E6_HPV16	TP53	MSH2	120435-609309	153	Colorectal cancer, hereditary nonpolyposis, type 1, 120435 (3)
PDI	E6_HPV16	TP73	BAX	L2921-600040	153	Colorectal cancer (3)
PDI	E6_HPV16	TP53	S100A2	-	-	-
PDI	E6_HPV16	TP53	NDRG1	601455-605262	356.1	Charcot-Marie-Tooth disease, type 4D, 601455 (3)
PDI	E6_HPV16	TP53	TGFA	-	-	-
PDI	E6_HPV16	IRF3	IFNA1	L4563-147660	-	Interferon, alpha, deficiency (1)
PDI	E6_HPV16	TP53	BAX	L597-600040	153	Colorectal cancer (3)
PDI	E6_HPV16	MYC	CDC25A	-	-	-
PDI	E6_HPV16	TP53	APC	135290-175100	171.9	Desmoid disease, hereditary, 135290 (3)
PDI	E6_HPV16	TP53	CASP1	-	-	-
PDI	E6_HPV16	MYC	CXCR4	L3358-162643	288.09	Myelokathexis, isolated (3)
PDI	E6_HPV16	TP53	TP63	604292-603273	755.4	Ectrodactyly, ectodermal dysplasia, and cleft lip/palate syndrome 3, 604292 (3)
PDI	E6_HPV16	MYC	TERT	609135-187270	284.9	Aplastic anemia, susceptibility to, 609135 (3)
PDI	E6_HPV16	MYC	ERBB2	L2056-164870	183	Ovarian cancer, somatic, (3)
PDI	E6_HPV16	MYC	ERBB2	256550-608272	272.2	Sialidosis, type II, 256550 (3)
PDI	E6_HPV16	IRF3	IFNA1	-	-	-
PDI	E6_HPV16	MYC	ERBB2	211980-164870	-	Adenocarcinoma of lung, somatic, 211980 (3)
PDI	E6_HPV16	MYC	ODC1	114500-165640	153	Colonic adenoma recurrence, reduced risk of, 114500 (3)
PDI	E6_HPV16	TP53	PCNA	-	-	-
PDI	E6_HPV16	TP53	MSH2	114030-609309	709.09	Cafe-au-lait spots, multiple, with leukemia, 114030 (3)
PDI	E6_HPV16	TP53	BAX	L2555-600040	204	T-cell acute lymphoblastic leukemia (3)
PDI	E6_HPV16	TP53	TP63	103285-603273	757.8	ADULT syndrome, 103285 (3)
PDI	E6_HPV16	TP53	APC	L4128-611731	-	Brain tumor-polyposis syndrome 2 (3)
PDI	E6_HPV16	MYC	YBX1	-	-	-
PDI	E6_HPV16	TP53	MDM2	L20-164785	216.9	Accelerated tumor formation, susceptibility to (3)
PDI	E6_HPV16	TP53	GADD45A	-	-	-
PDI	E6_HPV16	TP53	BAX	L2921-600040	153	Colorectal cancer (3)
PDI	E6_HPV16	TP53	TP63	605289-603273	755.67	Split-hand/foot malformation, type 4, 605289 (3)
PDI	E6_HPV16	TP53	CX3CL1	-	-	-
PDI	E6_HPV16	TP53	TNFRSF10B	601400-603612	173.9	Squamous cell carcinoma, head and neck, 601400 (3)
PDI	E6_HPV16	TP53	TP63	106260-603273	374.46	Hay-Wells syndrome, 106260 (3)
PDI	E6_HPV16	TP53	TP63	603543-603273	755.5	Limb-mammary syndrome, 603543 (3)
PDI	E6_HPV16	TP53	IGFBP3	-	-	-
PDI	E6_HPV16	TP53	TP63	129400-603273	757.31	Rapp-Hodgkin syndrome, 129400 (3)
PDI	E6_HPV16	TP53	PTTG1	-	-	-
PDI	E6_HPV16	IRF3	IFNB1	-	-	-
PDI	E6_HPV16	TP53	SERPINB5	-	-	-
PDI	E6_HPV16	TP53	APC	137215-611731	151.9	Gastric cancer, somatic, 137215 (3)
PDI	E6_HPV16	TP73	ADA	102700-608958	279.2	Severe combined immunodeficiency due to ADA deficiency, 102700 (3)
PDI	E6_HPV16	MYC	CXCR4	L1848-162643	288.09	Myelokathexis, isolated (3)
PDI	E6_HPV16	TP53	MSH2	158320-609309	706.2	Muir-Torre syndrome, 158320 (3)
PDI	E6_HPV16	TP53	TP53AIP1	-	-	-
PDI	E6_HPV16	TP53	PTK2	-	-	-
PDI	E6_HPV16	TP53	CD82	176807-600623	185	Prostate cancer, susceptibility to, 176807 (2)
PDI	E6_HPV16	TP53	APC	L2740-611731	211.4	Adenoma, periampullary (3)
PDI	E6_HPV16	TP53	FANCC	L3079-227645	284.09	Fanconi anemia, complementation group C (3)
PDI	E6_HPV16	IRF3	CCL5	L1245-187011	42	HIV-1 disease, rapid progression of (3)
PDI	E6_HPV16	TP53	MMP2	605156-120360	733.9	Osteolysis, idiopathic, Saudi type, 605156 (3)
PDI	E6_HPV16	TP53	APC	114500-611731	153	Colorectal cancer, somatic, 114500 (3)
PDI	E6_HPV16	TP53	MMP2	277950-120360	-	Winchester syndrome, 277950 (2)
PDI	E6_HPV16	IRF3	CCL5	L3817-187011	42	HIV-1 disease, rapid progression of (3)
PDI	E6_HPV16	MYC	CDK4	L1678-123829	172.9	Melanoma (3)
PDI	E6_HPV16	TP53	APAF1	-	-	-
PDI	E6_HPV16	TP73	TP73	L3379-601990	194	Neuroblastoma (1) ()
PDI	E6_HPV16	TP53	MSH2	137800-609309	191.9	Glioblastoma, early-onset, 137800 (3)
PDI	E6_HPV16	MYC	TERT	178500-187270	515	Pulmonary fibrosis,idiopathic, susceptibility to, 178500 (3)
PDI	E6_HPV16	TP53	TP53INP1	-	-	-
PDI	E6_HPV16	TP53	RFWD2	-	-	-
PDI	E6_HPV16	MYC	TERT	127550-187270	701.1	Dyskeratosis congenita, 127550 (3)
PDI	E6_HPV16	TP53	APC	L42-175100	211.4	Adenoma, periampullary (3)
PDI	E6_HPV16	TP53	APC	L1066-175100	287.2	Gardner syndrome (3)
PDI	E6_HPV16	IRF3	CCL5	L1244-187011	42	HIV-1 disease, delayed progression of (3)
PDI	E6_HPV16	TP53	MSH2	114400-609309	V84.01	Lynch cancer family syndrome II, 114400 (3)
PDI	E6_HPV16	TP53	DDB2	278740-600811	757.33	Xeroderma pigmentosum, group E, DDB-negative subtype, 278740 (3)
PDI	E6_HPV16	IRF3	CCL5	L3816-187011	42	HIV-1 disease, delayed progression of (3)
PDI	E6_HPV16	TP53	APC	135290-611731	171.9	Desmoid disease, hereditary, 135290 (3)
PDI	E6_HPV16	TP53	APC	L596-175100	153	Colorectal cancer (3)
PDI	E6_HPV16	MYC	CXCR4	193670-162643	-	WHIM syndrome, 193670 (3)
PDI	E6_HPV16	TP73	ADA	102700-608958	277.2	Severe combined immunodeficiency due to ADA deficiency, 102700 (3)
PDI	E6_HPV16	TP53	APC	611528-173325	-	Arrhythmogenic right ventricular dysplasia, familial, 12, 611528 (3)
PDI	E6_HPV16	MYC	EIF4E	-	-	-
PDI	E6_HPV16	IRF3	ISG15	-	-	-
PDI	E6_HPV16	TP53	SESN1	-	-	-
PDI	E6_HPV16	TP53	MSH2	162200-609309	237.7	Neurofibromatosis, type I, with leukemia, 162200 (3)
PDI	E6_HPV16	TP53	MSH2	L1618-609309	202.8	Lymphoma, T-cell (3)
PDI	E6_HPV16	TP53	FANCC	L1020-227645	284.09	Fanconi anemia, complementation group C (3)
PDI	E6_HPV16	TP53	SFN	-	-	-
PDI	E6_HPV16	TP53	MDM2	L3666-164785	216.9	Accelerated tumor formation, susceptibility to (3)
PDI	E6_HPV16	TP53	MSH2	L2053-609309	183	Ovarian cancer (3)
PDI	E6_HPV16	TP73	BAX	L2555-600040	204	T-cell acute lymphoblastic leukemia (3)
PDI	E6_HPV16	BRCA1	CDKN1B	610755-600778	-	Multiple endocrine neoplasia, type IV, 610755 (3)
PDI	E6_HPV16	TP73	BAX	L597-600040	153	Colorectal cancer (3)
PDI	E6_HPV16	BRCA1	CDKN1B	-	-	-
PDI	E7_HPV16	FOS	KRT16	144200-148067	757.39	Palmoplantar verrucous nevus, unilateral, 144200 (3)
PDI	E7_HPV16	JUN	MSH2	276300-609309	-	Mismatch repair cancer syndrome, 276300 (3)
PDI	E7_HPV16	FOS	GNRHR	L1359-138850	253.4	Hypogonadotropic hypogonadism (3)
PDI	E7_HPV16	FOS	APOH	L185-138700	281.4	Apolipoprotein H deficiency (3)
PDI	E7_HPV16	MYC	ERBB2	L3415-164870	183	Ovarian cancer, somatic, (3)
PDI	E7_HPV16	FOS	KRT16	167200-148067	757.5	Pachyonychia congenita, Jadassohn-Lewandowsky type, 167200 (3)
PDI	E7_HPV16	JUN	GJA1	164200-121014	759.89	Oculodentodigital dysplasia, 164200 (3)
PDI	E7_HPV16	JUN	GNRHR	L3163-138850	253.4	Hypogonadotropic hypogonadism (3)
PDI	E7_HPV16	FOS	MT2A	-	-	-
PDI	E7_HPV16	JUN	MSH2	120435-609309	153	Colorectal cancer, hereditary nonpolyposis, type 1, 120435 (3)
PDI	E7_HPV16	JUN	GJA1	600309-121014	426.1	Atrioventricular septal defect, 600309 (3)
PDI	E7_HPV16	JUN	GJA1	L2987-608219	389.9	Deafness, autosomal recessive 38 (2)
PDI	E7_HPV16	MYC	ERBB2	137800-164870	191.9	Glioblastoma, somatic, 137800 (3)
PDI	E7_HPV16	MYC	ERBB2	137215-164870	151.9	Gastric cancer, somatic, 137215 (3)
PDI	E7_HPV16	MYC	CDK4	L1678-123829	172.9	Melanoma (3)
PDI	E7_HPV16	MYC	ERBB2	256550-608272	272.2	Sialidosis, type II, 256550 (3)
PDI	E7_HPV16	MYC	ERBB2	211980-164870	-	Adenocarcinoma of lung, somatic, 211980 (3)
PDI	E7_HPV16	JUN	MSH2	162200-609309	237.7	Neurofibromatosis, type I, with leukemia, 162200 (3)
PDI	E7_HPV16	JUN	APP	L109-104760	331	Alzheimer disease-1, APP-related (3)
PDI	E7_HPV16	JUN	MSH2	137800-609309	191.9	Glioblastoma, early-onset, 137800 (3)
PDI	E7_HPV16	JUN	MSH2	158320-609309	706.2	Muir-Torre syndrome, 158320 (3)
PDI	E7_HPV16	JUN	MSH2	114030-609309	709.09	Cafe-au-lait spots, multiple, with leukemia, 114030 (3)
PDI	E7_HPV16	JUN	IFNB1	-	-	-
PDI	E7_HPV16	FOS	KRT16	600962-148067	757.39	Palmoplantar keratoderma, nonepidermolytic, 600962 (3)
PDI	E7_HPV16	JUN	MMP1	606963-120353	496	COPD, rate of decline of lung function in, 606963 (3)
PDI	E7_HPV16	JUN	MMP1	226600-120353	757.39	Epidermolysis bullosa dystrophica, autosomal recessive, modifier of, 226600 (3)
PDI	E7_HPV16	IRF1	NOD1	-	-	-
PDI	E7_HPV16	JUN	TERT	178500-187270	515	Pulmonary fibrosis,idiopathic, susceptibility to, 178500 (3)
PDI	E7_HPV16	FOS	FOSL1	-	-	-
PDI	E7_HPV16	FOS	A4GALT	111400-607922	-	Blood group, P system, 111400 (3)
PDI	E7_HPV16	JUN	FN1	L3417-604061	183	Ovarian carcinoma (1)
PDI	E7_HPV16	JUN	BRCA1	L359-113705	239.3	Breast-ovarian cancer (3)
PDI	E7_HPV16	JUN	TERT	609135-187270	284.9	Aplastic anemia, susceptibility to, 609135 (3)
PDI	E7_HPV16	IRF1	CASP8	211980-601763	162.9	Lung cancer, protection against, 211980 (3)
PDI	E7_HPV16	JUN	KRT16	144200-148067	757.39	Palmoplantar verrucous nevus, unilateral, 144200 (3)
PDI	E7_HPV16	JUN	GSS	266130-601002	276.2	Glutathione synthetase deficiency, 266130 (3)
PDI	E7_HPV16	IRF1	IFITM1	-	-	-
PDI	E7_HPV16	JUN	VIP	-	-	-
PDI	E7_HPV16	FOS	IL8	-	-	-
PDI	E7_HPV16	JUN	BRCA1	L2052-113705	183	Ovarian cancer (3)
PDI	E7_HPV16	JUN	KRT16	167200-148067	757.5	Pachyonychia congenita, Jadassohn-Lewandowsky type, 167200 (3)
PDI	E7_HPV16	JUND	TNFRSF10A	-	-	-
PDI	E7_HPV16	JUN	TNF	L3764-191160	294.8	Dementia, vascular, susceptibility to (3)
PDI	E7_HPV16	JUN	BRCA1	L3413-113705	183	Ovarian cancer (3)
PDI	E7_HPV16	JUN	BRCA1	L343-113705	239.3	Breast cancer-1 (3)
PDI	E7_HPV16	FOS	OPRM1	L3650-600018	709	Response to morphine-6-glucuronide (3)
PDI	E7_HPV16	FOS	OPRM1	600669-600018	345.9	Epilepsy, idiopathic generalized, susceptibility to, 600669 (3)
PDI	E7_HPV16	JUN	BCL2A1	-	-	-
PDI	E7_HPV16	JUN	EDN1	L3641-131240	286.9	High density lipoprotein cholesterol level QTL 7 (3)
PDI	E7_HPV16	JUND	TERT	178500-187270	515	Pulmonary fibrosis,idiopathic, susceptibility to, 178500 (3)
PDI	E7_HPV16	FOS	A4GALT	-	-	-
PDI	E7_HPV16	IRF1	CASP8	607271-601763	279.4	Autoimmune lymphoproliferative syndrome, type IIB, 607271 (3)
PDI	E7_HPV16	JUN	ATF3	-	-	-
PDI	E7_HPV16	JUND	IL5	-	-	-
PDI	E7_HPV16	TBP	TGFA	-	-	-
PDI	E7_HPV16	JUN	NPPA	-	-	-
PDI	E7_HPV16	JUND	TERT	127550-187270	701.1	Dyskeratosis congenita, 127550 (3)
PDI	E7_HPV16	JUND	TERT	609135-187270	284.9	Aplastic anemia, susceptibility to, 609135 (3)
PDI	E7_HPV16	JUN	TNF	L2413-191160	995.91	Septic shock, susceptibility to (3)
PDI	E7_HPV16	TBP	DHFR	L2771-126060	285.9	Anemia, megaloblastic, due to DHFR deficiency (1) ()
PDI	E7_HPV16	JUND	TGM1	242100-190195	757.1	Ichthyosiform erythroderma, congenital, 242100 (3)
PDI	E7_HPV16	JUN	GNRHR	228300-138850	257.2	Fertile eunuch syndrome, 228300 (3)
PDI	E7_HPV16	IRF1	IFIT2	-	-	-
PDI	E7_HPV16	IRF1	CASP8	114480-601763	239.3	Breast cancer, protection against, 114480 (3)
PDI	E7_HPV16	IRF1	ISG15	-	-	-
PDI	E7_HPV16	JUNB	PLAU	104300-191840	331	Alzheimer disease, late-onset, susceptibility to, 104300 (3)
PDI	E7_HPV16	IRF1	CASP8	114550-601763	211.5	Hepatocellular carcinoma, somatic, 114550 (3)
PDI	E7_HPV16	JUN	TNFRSF10A	-	-	-
PDI	E7_HPV16	JUN	CCL5	L1244-187011	42	HIV-1 disease, delayed progression of (3)
PDI	E7_HPV16	JUN	APP	L2767-104760	277.39	Amyloidosis, cerebroarterial, Dutch type (3)
PDI	E7_HPV16	JUN	NAT1	604715-163970	333	Orthostatic intolerance, 604715 (3)
PDI	E7_HPV16	BRCA1	CDKN1B	610755-600778	-	Multiple endocrine neoplasia, type IV, 610755 (3)
PDI	E7_HPV16	IRF1	IFNB1	-	-	-
PDI	E7_HPV16	JUN	APP	L132-104760	277.39	Amyloidosis, cerebroarterial, Dutch type (3)
PDI	E7_HPV16	JUN	APP	231550-605378	255.5	Achalasia-addisonianism-alacrimia syndrome, 231550 (3)
PDI	E7_HPV16	JUN	MSH2	L2053-609309	183	Ovarian cancer (3)
PDI	E7_HPV16	JUN	MSH2	L1618-609309	202.8	Lymphoma, T-cell (3)
PDI	E7_HPV16	JUNB	HOXD13	113200-142989	755.5	Brachydactyly, type D, 113200 (3)
PDI	E7_HPV16	FOS	MMP1	226600-120353	757.39	Epidermolysis bullosa dystrophica, autosomal recessive, modifier of, 226600 (3)
PDI	E7_HPV16	JUN	TGM1	242300-190195	757.1	Self-healing collodion baby, 242300 (3)
PDI	E7_HPV16	JUN	CD82	176807-600623	185	Prostate cancer, susceptibility to, 176807 (2)
PDI	E7_HPV16	JUN	NPPA	612201-108780	-	Atrial fibrillation, familial, 6, 612201 (3)
PDI	E7_HPV16	IRF1	CIITA	126200-600005	340	Multiple sclerosis, susceptibility to, 126200 (3)
PDI	E7_HPV16	FOS	IL2	-	-	-
PDI	E7_HPV16	IRF1	CIITA	180300-600005	714	Rheumatoid arthritis, susceptibility to, 180300 (3)
PDI	E7_HPV16	FOS	PLAU	104300-191840	331	Alzheimer disease, late-onset, susceptibility to, 104300 (3)
PDI	E7_HPV16	JUN	APP	L2386-104760	295.9	Schizophrenia, chronic (3)
PDI	E7_HPV16	JUN	GNRHR	L1359-138850	253.4	Hypogonadotropic hypogonadism (3)
PDI	E7_HPV16	IRF1	IFNA1	L4563-147660	-	Interferon, alpha, deficiency (1)
PDI	E7_HPV16	IRF1	NR3C1	L4265-138040	-	Cortisol resistance (3)
PDI	E7_HPV16	IRF1	HADHA	L1176-600890	642.5	HELLP syndrome, maternal, of pregnancy (3)
PDI	E7_HPV16	JUN	GJA1	186100-121014	755.1	Syndactyly, type III, 186100 (3)
PDI	E7_HPV16	JUN	APP	L2761-104760	331	Alzheimer disease-1, APP-related (3)
PDI	E7_HPV16	JUN	PLAU	104300-191840	331	Alzheimer disease, late-onset, susceptibility to, 104300 (3)
PDI	E7_HPV16	JUND	HOXD13	113300-142989	755.5	Brachydactyly, type E, 113300 (3)
PDI	E7_HPV16	JUN	GJA1	241550-121014	746.7	Hypoplastic left heart syndrome, 241550 (3)
PDI	E7_HPV16	JUN	CCL5	L1245-187011	42	HIV-1 disease, rapid progression of (3)
PDI	E7_HPV16	JUND	TGM1	242300-190195	757.1	Self-healing collodion baby, 242300 (3)
PDI	E7_HPV16	JUN	SELE	L3692-131210	440.9	Atherosclerosis, susceptibility to (2)
PDI	E7_HPV16	JUNB	TNFRSF10A	-	-	-
PDI	E7_HPV16	JUN	GSS	231900-601002	283.9	Hemolytic anemia due to glutathione synthetase deficiency, 231900 (3)
PDI	E7_HPV16	JUN	TNF	L790-191160	294.8	Dementia, vascular, susceptibility to (3)
PDI	E7_HPV16	IRF1	CCL5	L1244-187011	42	HIV-1 disease, delayed progression of (3)
PDI	E7_HPV16	JUN	TSHB	L1387-188540	244.9	Hypothyroidism, nongoitrous (3)
PDI	E7_HPV16	JUN	TNF	600807-191160	493.9	Asthma, susceptibility to, 600807 (3)
PDI	E7_HPV16	JUN	TNF	L3982-191160	995.91	Septic shock, susceptibility to (3)
PDI	E7_HPV16	JUN	CCL5	L3817-187011	42	HIV-1 disease, rapid progression of (3)
PDI	E7_HPV16	JUN	TNF	L1640-191160	84.6	Malaria, cerebral, susceptibility to (3)
PDI	E7_HPV16	JUN	TNF	157300-191160	346.9	Migraine without aura, susceptibility to, 157300 (3)
PDI	E7_HPV16	JUNB	IL2	L5024-147680	-	Severe combined immunodeficiency due to IL2 deficiency (1)
PDI	E7_HPV16	JUND	HOXD13	113200-142989	755.5	Brachydactyly, type D, 113200 (3)
PDI	E7_HPV16	FOS	EDN1	L3641-131240	286.9	High density lipoprotein cholesterol level QTL 7 (3)
PDI	E7_HPV16	JUNB	IL2	-	-	-
PDI	E7_HPV16	JUND	HOXD13	186000-142989	755.1	Synpolydactyly with foot anomalies, 186000 (3)
PDI	E7_HPV16	IRF1	CCL5	L3817-187011	42	HIV-1 disease, rapid progression of (3)
PDI	E7_HPV16	JUN	IL2	-	-	-
PDI	E7_HPV16	IRF1	PSMB9	-	-	-
PDI	E7_HPV16	MYC	CDC25A	-	-	-
PDI	E7_HPV16	JUN	FN1	L3213-604061	208.9	Leukemia, acute myeloid, therapy-related (1)
PDI	E7_HPV16	MYC	TERT	178500-187270	515	Pulmonary fibrosis,idiopathic, susceptibility to, 178500 (3)
PDI	E7_HPV16	FOS	IL2	L5024-147680	-	Severe combined immunodeficiency due to IL2 deficiency (1)
PDI	E7_HPV16	FOS	WEE1	-	-	-
PDI	E7_HPV16	JUN	BRCA1	L2091-113705	158.8	Papillary serous carcinoma of the peritoneum (3)
PDI	E7_HPV16	JUNB	IVL	-	-	-
PDI	E7_HPV16	JUN	A4GALT	111400-607922	-	Blood group, P system, 111400 (3)
PDI	E7_HPV16	JUNB	TGM1	242300-190195	757.1	Self-healing collodion baby, 242300 (3)
PDI	E7_HPV16	FOS	MMP1	606963-120353	496	COPD, rate of decline of lung function in, 606963 (3)
PDI	E7_HPV16	JUN	IL2	L5024-147680	-	Severe combined immunodeficiency due to IL2 deficiency (1)
PDI	E7_HPV16	JUND	FOSL1	-	-	-
PDI	E7_HPV16	JUNB	HOXD13	186000-142989	755.1	Synpolydactyly with foot anomalies, 186000 (3)
PDI	E7_HPV16	IRF1	SLPI	-	-	-
PDI	E7_HPV16	JUN	FN1	601894-135600	-	Glomerulopathy with fibronectin deposits 2, 601894 (3)
PDI	E7_HPV16	IRF1	TLR3	-	-	-
PDI	E7_HPV16	FOS	NAT1	604715-163970	333	Orthostatic intolerance, 604715 (3)
PDI	E7_HPV16	JUN	FN1	162100-604061	-	Amyotrophy, hereditary neuralgic, 162100 (3)
PDI	E7_HPV16	JUN	CCL5	L3816-187011	42	HIV-1 disease, delayed progression of (3)
PDI	E7_HPV16	MYC	TERT	127550-187270	701.1	Dyskeratosis congenita, 127550 (3)
PDI	E7_HPV16	IRF1	IFNA1	-	-	-
PDI	E7_HPV16	IRF1	FASLG	152700-134638	710	Systemic lupus erythematosus, susceptibility, 152700 (3)
PDI	E7_HPV16	JUN	A4GALT	-	-	-
PDI	E7_HPV16	IRF1	HADHA	L2616-600890	277.85	Trifunctional protein deficiency, type 1 (3)
PDI	E7_HPV16	JUN	MSH2	114400-609309	V84.01	Lynch cancer family syndrome II, 114400 (3)
PDI	E7_HPV16	IRF1	HADHA	L1472-600890	277.85	LCHAD deficiency (3)
PDI	E7_HPV16	IRF1	HADHA	L1030-600890	571.8	Fatty liver, acute, of pregnancy (3)
PDI	E7_HPV16	IRF1	CIITA	209920-600005	279.2	Bare lymphocyte syndrome, type II, complementation group A, 209920 (3)
PDI	E7_HPV16	JUND	IVL	-	-	-
PDI	E7_HPV16	JUNB	HOXD13	113300-142989	755.5	Brachydactyly, type E, 113300 (3)
PDI	E7_HPV16	IRF1	NR3C1	-	-	-
PDI	E7_HPV16	MYC	ERBB2	L2056-164870	183	Ovarian cancer, somatic, (3)
PDI	E7_HPV16	BRCA1	CDKN1B	-	-	-
PDI	E7_HPV16	JUN	APOH	L185-138700	281.4	Apolipoprotein H deficiency (3)
PDI	E7_HPV16	JUNB	TGM1	242100-190195	757.1	Ichthyosiform erythroderma, congenital, 242100 (3)
PDI	E7_HPV16	MYC	CXCR4	L3358-162643	288.09	Myelokathexis, isolated (3)
PDI	E7_HPV16	MYC	CXCR4	193670-162643	-	WHIM syndrome, 193670 (3)
PDI	E7_HPV16	IRF1	CCL5	L3816-187011	42	HIV-1 disease, delayed progression of (3)
PDI	E7_HPV16	JUN	FN1	208250-604283	569.89	Camptodactyly-arthropathy-coxa vara-pericarditis syndrome, 208250 (3)
PDI	E7_HPV16	JUN	IL5	-	-	-
PDI	E7_HPV16	IRF1	CCL5	L1245-187011	42	HIV-1 disease, rapid progression of (3)
PDI	E7_HPV16	JUN	MT2A	-	-	-
PDI	E7_HPV16	MYC	TERT	609135-187270	284.9	Aplastic anemia, susceptibility to, 609135 (3)
PDI	E7_HPV16	JUN	KRT16	600962-148067	757.39	Palmoplantar keratoderma, nonepidermolytic, 600962 (3)
PDI	E7_HPV16	JUND	PLAU	104300-191840	331	Alzheimer disease, late-onset, susceptibility to, 104300 (3)
PDI	E7_HPV16	JUN	SELE	161950-131210	-	IgA nephropathy, susceptiblity to, 161950 (3)
PDI	E7_HPV16	JUN	SELE	145500-131210	-	Blood pressure regulation QTL, 145500 (2)
PDI	E7_HPV16	MYC	ODC1	114500-165640	153	Colonic adenoma recurrence, reduced risk of, 114500 (3)
PDI	E7_HPV16	MYC	CXCR4	L1848-162643	288.09	Myelokathexis, isolated (3)
PDI	E7_HPV16	JUN	TGM1	242100-190195	757.1	Ichthyosiform erythroderma, congenital, 242100 (3)
PDI	E7_HPV16	JUN	ITGAX	-	-	-
PDI	E7_HPV16	MYC	YBX1	-	-	-
PDI	E7_HPV16	JUN	TERT	127550-187270	701.1	Dyskeratosis congenita, 127550 (3)
PDI	E7_HPV16	FOS	GNRHR	228300-138850	257.2	Fertile eunuch syndrome, 228300 (3)
PDI	E7_HPV16	FOS	GNRHR	L3163-138850	253.4	Hypogonadotropic hypogonadism (3)
PDI	E7_HPV16	TBP	GFAP	203450-137780	781.99	Alexander disease, 203450 (3)
PDI	E7_HPV16	MYC	EIF4E	-	-	-
PDI	E7_HPV16	IRF1	IL18BP	-	-	-
PDI	E7_HPV16	TBP	PADI3	-	-	-
PDI	E7_HPV16	JUNB	FOSL1	-	-	-
PDI	E2_HPV16	TP53	ATF3	-	-	-
PDI	E6_HPV16	TP53	ATF3	-	-	-
MCI_KEGG	E7_HPV16	FARS2	PRDX5	-	-	-
MCI_KEGG	E7_HPV16	POLR1C	ADCY7	-	-	-
MCI_KEGG	E7_HPV16	FARS2	GOT1	-	-	-
MCI_KEGG	E7_HPV16	PRKAA2	NUDT12	-	-	-
MCI_KEGG	E7_HPV16	PRKAA2	ENPP1	125853-173335	250	Diabetes mellitus, non-insulin-dependent, susceptibility to, 125853 (3)
MCI_KEGG	E7_HPV16	PRKAA2	ENPP1	602475-173335	728.1	Ossification of posterior longitudinal ligament of spine, 602475 (3)
MCI_KEGG	E7_HPV16	POLR1C	ADCY1	-	-	-
MCI_KEGG	E7_HPV16	FARS2	MPO	L3846-606989	162.9	Lung cancer, protection against, in smokers (3)
MCI_KEGG	E7_HPV16	POLR1C	PKM2	-	-	-
MCI_KEGG	E7_HPV16	POLR1C	NME7	-	-	-
MCI_KEGG	E7_HPV16	FARS2	TAT	L3570-276600	270.2	Tyrosinemia, type II (3)
MCI_KEGG	E7_HPV16	PRKAA2	NT5M	-	-	-
MCI_KEGG	E7_HPV16	FARS2	PAH	L1313-261600	270.1	Hyperphenylalaninemia, mild (3)
MCI_KEGG	E7_HPV16	FARS2	PAH	L2136-261600	270.1	Phenylketonuria (3)
MCI_KEGG	E7_HPV16	PRKAA2	NT5E	-	-	-
MCI_KEGG	E7_HPV16	POLR1C	ADCY4	-	-	-
MCI_KEGG	E7_HPV16	POLR1C	ADCY10	143870-605205	275.4	Hypercalciuria, absorptive, susceptibility to, 143870 (3)
MCI_KEGG	E7_HPV16	FARS2	PRDX6	-	-	-
MCI_KEGG	E7_HPV16	POLR1C	CTPS	-	-	-
MCI_KEGG	E7_HPV16	POLR1C	ENTPD2	-	-	-
MCI_KEGG	E7_HPV16	PRKAA2	ENPP3	-	-	-
MCI_KEGG	E7_HPV16	POLR1C	ATP1B1	-	-	-
MCI_KEGG	E7_HPV16	POLR1C	PKLR	L149-266200	285.9	Anemia, hemolytic, due to PK deficiency (3)
MCI_KEGG	E7_HPV16	POLR1C	PKLR	266200-609712	-	Pyruvate kinase deficiency, 266200 (3)
MCI_KEGG	E7_HPV16	PRKAA2	ENPP2	-	-	-
MCI_KEGG	E7_HPV16	POLR1C	CTPS2	-	-	-
MCI_KEGG	E7_HPV16	POLR1C	ADCY5	-	-	-
MCI_KEGG	E7_HPV16	FARS2	TAT	L2631-276600	270.2	Tyrosinemia, type II (3)
MCI_KEGG	E7_HPV16	PRKAA2	QPRT	-	-	-
MCI_KEGG	E7_HPV16	FARS2	DDC	608643-107930	277.6	Aromatic L-amino acid decarboxylase deficiency, 608643 (3)
MCI_KEGG	E7_HPV16	POLR1C	ADCY3	-	-	-
MCI_KEGG	E7_HPV16	FARS2	TPO	187950-600044	238.71	Thrombocythemia, essential, 187950 (3)
MCI_KEGG	E7_HPV16	POLR1C	NME4	-	-	-
MCI_KEGG	E7_HPV16	PRKAA2	NT5C	-	-	-
MCI_KEGG	E7_HPV16	PRKAA2	NMNAT1	-	-	-
MCI_KEGG	E7_HPV16	PRKAA2	NT5C1A	-	-	-
MCI_KEGG	E7_HPV16	FARS2	GOT1L1	-	-	-
MCI_KEGG	E7_HPV16	FARS2	PRDX2	-	-	-
MCI_KEGG	E7_HPV16	FARS2	TPO	274500-606765	244.9	Total iodide organification defect, 274500 (3)
MCI_KEGG	E7_HPV16	FARS2	EPX	-	-	-
MCI_KEGG	E7_HPV16	FARS2	TPO	L3114-606765	240.9	Goiter, congenital (3)
MCI_KEGG	E7_HPV16	POLR1C	ADCY2	-	-	-
MCI_KEGG	E7_HPV16	FARS2	LPO	-	-	-
MCI_KEGG	E7_HPV16	FARS2	EPX	261500-131399	-	Eosinophil peroxidase deficiency, 261500 (3)
MCI_KEGG	E7_HPV16	FARS2	TPO	L3155-606765	242.9	Hyperthyroidism, congenital (3)
MCI_KEGG	E7_HPV16	FARS2	MPO	104300-606989	331	Alzheimer disease, susceptibility to, 104300 (3)
MCI_KEGG	E7_HPV16	FARS2	MPO	254600-606989	-	Myeloperoxidase deficiency, 254600 (3)
MCI_KEGG	E7_HPV16	PRKAA2	NMNAT2	-	-	-
MCI_KEGG	E7_HPV16	FARS2	TPO	L1143-606765	240.9	Goiter, congenital (3)
MCI_KEGG	E7_HPV16	POLR1C	ATP1B1	145500-182330	-	Blood pressure regulation QTL, 145500 (2)
MCI_KEGG	E7_HPV16	POLR1C	ENTPD3	158000-601928	757.4	Monilethrix, 158000 (3)
MCI_KEGG	E7_HPV16	POLR1C	NUDT2	-	-	-
MCI_KEGG	E7_HPV16	FARS2	PAH	261600-612349	-	Hyperphenylalaninemia, mild, 261600 (3)
MCI_KEGG	E7_HPV16	POLR1C	ADCY8	-	-	-
MCI_KEGG	E7_HPV16	PRKAA2	NP	L3394-164050	334.3	Nucleoside phosphorylase deficiency, immunodeficiency due to (3)
MCI_KEGG	E7_HPV16	FARS2	TPO	L1333-606765	242.9	Hyperthyroidism, congenital (3)
MCI_KEGG	E7_HPV16	POLR1C	NME6	-	-	-
MCI_KEGG	E7_HPV16	PRKAA2	NMNAT3	-	-	-
MCI_KEGG	E7_HPV16	PRKAA2	NT5C2	-	-	-
MCI_KEGG	E7_HPV16	FARS2	PRDX1	-	-	-
MCI_KEGG	E7_HPV16	FARS2	GOT2	-	-	-
MCI_KEGG	E7_HPV16	POLR1C	ADCY6	-	-	-
MCI_KEGG	E7_HPV16	PRKAA2	NT5C1B	-	-	-
MCI_KEGG	E7_HPV16	POLR1C	NME2	-	-	-
MCI_KEGG	E7_HPV16	PRKAA2	NP	L1965-164050	334.3	Nucleoside phosphorylase deficiency, immunodeficiency due to (3)
MCI_KEGG	E7_HPV16	PRKAA2	ENPP1	208000-173335	-	Arterial calcification, generalized, of infancy, 208000 (3)
MCI_KEGG	E7_HPV16	POLR1C	INO80	-	-	-
MCI_KEGG	E7_HPV16	POLR1C	ENTPD1	-	-	-
MCI_KEGG	E7_HPV16	POLR1C	CANT1	-	-	-
MCI_KEGG	E7_HPV16	FARS2	PXDNL	-	-	-
MCI_KEGG	E7_HPV16	PRKAA2	NT5E	612020-603197	-	Spastic paraplegia 39, 612020 (3)
MCI_KEGG	E7_HPV16	POLR1C	ADCY9	-	-	-
MCI_KEGG	E7_HPV16	PRKAA2	ENPP1	601665-173335	278	Obesity, susceptibility to, 601665 (3)
MCI_KEGG	E7_HPV16	PRKAA2	NT5C3	266120-606224	285.9	Anemia, hemolytic, due to UMPH1 deficiency, 266120 (3)
MCI_KEGG	E7_HPV16	POLR1C	ENTPD8	-	-	-
MCI_KEGG	E7_HPV16	POLR1C	NME1	256700-156490	194	Neuroblastoma, 256700 (3)
MCI_KEGG	E7_HPV16	PLCB3	LIPC	L1210-151670	272.9	Hepatic lipase deficiency (3)
MCI_KEGG	E7_HPV16	PRMT5	UGT2B4	-	-	-
MCI_KEGG	E7_HPV16	PRMT5	MAOA	-	-	-
MCI_KEGG	E7_HPV16	RUVBL2	EP400	-	-	-
MCI_KEGG	E7_HPV16	PLCB3	PIK3CA	604370-171834	183	Ovarian cancer, 604370 (3)
MCI_KEGG	E7_HPV16	PLCB3	PI4KA	-	-	-
MCI_KEGG	E7_HPV16	ALPL	DHX40	-	-	-
MCI_KEGG	E7_HPV16	RNF2	ALDH3A1	-	-	-
MCI_KEGG	E7_HPV16	ALPL	RAD54L2	-	-	-
MCI_KEGG	E7_HPV16	RUVBL2	DDX5	-	-	-
MCI_KEGG	E7_HPV16	PLCB3	PPAP2C	-	-	-
MCI_KEGG	E7_HPV16	RUVBL2	RAD54B	L1614-604289	202.8	Lymphoma, non-Hodgkin (3)
MCI_KEGG	E7_HPV16	ALPL	DDX56	-	-	-
MCI_KEGG	E7_HPV16	PYGM	LYZL1	-	-	-
MCI_KEGG	E7_HPV16	RUVBL2	RAD54L	L3254-603615	202.8	Lymphoma, non-Hodgkin (3)
MCI_KEGG	E7_HPV16	ALPL	DDX23	-	-	-
MCI_KEGG	E7_HPV16	RUVBL2	RAD54B	L576-604289	153	Colon adenocarcinoma (3)
MCI_KEGG	E7_HPV16	ALPL	NUDT1	-	-	-
MCI_KEGG	E7_HPV16	RUVBL2	LOC728849	-	-	-
MCI_KEGG	E7_HPV16	PRMT5	AHCY	L1303-180960	270.4	Hypermethioninemia with deficiency of S-adenosylhomocysteine hydrolase (3)
MCI_KEGG	E7_HPV16	PLCB3	PPAP2B	-	-	-
MCI_KEGG	E7_HPV16	ALPL	DDX55	-	-	-
MCI_KEGG	E7_HPV16	ALPL	LOC728849	-	-	-
MCI_KEGG	E7_HPV16	RUVBL2	NUDT18	-	-	-
MCI_KEGG	E7_HPV16	ALPL	SMARCA2	-	-	-
MCI_KEGG	E7_HPV16	RUVBL2	RAD54B	L3253-604289	202.8	Lymphoma, non-Hodgkin (3)
MCI_KEGG	E7_HPV16	ALPL	DDX50	-	-	-
MCI_KEGG	E7_HPV16	ALPL	RECQL	-	-	-
MCI_KEGG	E7_HPV16	RUVBL2	DHX40	-	-	-
MCI_KEGG	E7_HPV16	ALPL	EIF4A2	-	-	-
MCI_KEGG	E7_HPV16	ALPL	DDX4	-	-	-
MCI_KEGG	E7_HPV16	RUVBL2	RAD54L	L2827-603615	239.3	Breast cancer, invasive intraductal (3)
MCI_KEGG	E7_HPV16	RUVBL2	IFIH1	610155-606951	-	Diabetes mellitus, insulin-dependent, susceptibility to, 610155 (3)
MCI_KEGG	E7_HPV16	RUVBL2	RAD54L	L577-603615	153	Colon adenocarcinoma (3)
MCI_KEGG	E7_HPV16	RUVBL2	ATRX	309590-300032	319	Juberg-Marsidi syndrome, 309590 (3)
MCI_KEGG	E7_HPV16	PRMT5	MAOA	L4139-309850	-	Brunner syndrome (3)
MCI_KEGG	E7_HPV16	ALPL	BLM	277700-604611	259.8	Werner syndrome, 277700 (3)
MCI_KEGG	E7_HPV16	PYGM	GALT	230400-606999	271.1	Galactosemia, 230400 (3)
MCI_KEGG	E7_HPV16	RUVBL2	ATRX	309500-300463	319	Renpenning syndrome, 309500 (3)
MCI_KEGG	E7_HPV16	RUVBL2	DDX51	-	-	-
MCI_KEGG	E7_HPV16	RUVBL2	ATRX	309490-300032	759.89	Chudley-Lowry syndrome, 309490 (3)
MCI_KEGG	E7_HPV16	PRMT5	UGT1A4	-	-	-
MCI_KEGG	E7_HPV16	RUVBL2	ATP13A2	-	-	-
MCI_KEGG	E7_HPV16	PLCB3	LIPC	L3635-151670	286.9	High density lipoprotein cholesterol level QTL 12 (3)
MCI_KEGG	E7_HPV16	ALPL	NUDT18	-	-	-
MCI_KEGG	E7_HPV16	PLCB3	LIPC	125853-151670	250	Diabetes mellitus, noninsulin-dependent, 125853 (3)
MCI_KEGG	E7_HPV16	RUVBL2	DDX50	-	-	-
MCI_KEGG	E7_HPV16	RUVBL2	ASCC3	-	-	-
MCI_KEGG	E7_HPV16	PRMT5	AHCYL1	-	-	-
MCI_KEGG	E7_HPV16	RUVBL2	RUVBL1	-	-	-
MCI_KEGG	E7_HPV16	ALPL	DDX51	-	-	-
MCI_KEGG	E7_HPV16	PLCB3	PIK3CG	-	-	-
MCI_KEGG	E7_HPV16	ALPL	DDX18	-	-	-
MCI_KEGG	E7_HPV16	RUVBL2	ATRX	301040-300032	282.49	Alpha-thalassemia/mental retardation syndrome, 301040 (3)
MCI_KEGG	E7_HPV16	RUVBL2	DDX4	-	-	-
MCI_KEGG	E7_HPV16	PRMT5	UGT1A10	-	-	-
MCI_KEGG	E7_HPV16	RNF2	ALDH1A3	-	-	-
MCI_KEGG	E7_HPV16	PRMT5	HARS2	-	-	-
MCI_KEGG	E7_HPV16	RUVBL2	DDX56	-	-	-
MCI_KEGG	E7_HPV16	PRMT5	UGT2B17	-	-	-
MCI_KEGG	E7_HPV16	PYGM	UGP2	-	-	-
MCI_KEGG	E7_HPV16	ALPL	SNRNP200	-	-	-
MCI_KEGG	E7_HPV16	RUVBL2	NUDT1	-	-	-
MCI_KEGG	E7_HPV16	PRMT5	UGT1A9	-	-	-
MCI_KEGG	E7_HPV16	ALPL	DNA2	-	-	-
MCI_KEGG	E7_HPV16	PRMT5	UGT1A6	237900-191740	782.4	Hyperbilirubinemia, familial transcient neonatal, 237900 (3)
MCI_KEGG	E7_HPV16	RUVBL2	ALPL	146300-171760	520.4	Odontohypophosphatasia, 146300 (3)
MCI_KEGG	E7_HPV16	PLCB3	OCRL	300009-300535	592	Dent syndrome, 300009 (3)
MCI_KEGG	E7_HPV16	ALPL	DDX11	-	-	-
MCI_KEGG	E7_HPV16	RUVBL2	ATRX	300448-300032	282.49	Alpha-thalassemia myelodysplasia syndrome, somatic, 300448 (3)
MCI_KEGG	E7_HPV16	PRMT5	COQ6	-	-	-
MCI_KEGG	E7_HPV16	PYGM	ENPP1	601665-173335	278	Obesity, susceptibility to, 601665 (3)
MCI_KEGG	E7_HPV16	PLCB3	PIKFYVE	121850-609414	371.5	Corneal fleck dystrophy, 121850 (3)
MCI_KEGG	E7_HPV16	RUVBL2	ATRX	L3120-300463	751.3	Golabi-Ito-Hall syndrome (3)
MCI_KEGG	E7_HPV16	ALPL	ATRX	309500-300463	319	Renpenning syndrome, 309500 (3)
MCI_KEGG	E7_HPV16	RUVBL2	ATP13A2	606693-610513	-	Parkinson disease 9, 606693 (3)
MCI_KEGG	E7_HPV16	PYGM	AMY1A	-	-	-
MCI_KEGG	E7_HPV16	RUVBL2	DDX12	-	-	-
MCI_KEGG	E7_HPV16	PLCB3	CHPT1	-	-	-
MCI_KEGG	E7_HPV16	PLCB3	PNLIP	-	-	-
MCI_KEGG	E7_HPV16	PYGM	PGM1	-	-	-
MCI_KEGG	E7_HPV16	ALPL	RUVBL2	-	-	-
MCI_KEGG	E7_HPV16	RUVBL2	DDX6	-	-	-
MCI_KEGG	E7_HPV16	PYGM	ENPP3	-	-	-
MCI_KEGG	E7_HPV16	PYGM	ENPP1	125853-173335	250	Diabetes mellitus, non-insulin-dependent, susceptibility to, 125853 (3)
MCI_KEGG	E7_HPV16	PLCB3	PTEN	L4637-601728	-	Macrocephaly/autism s
MCI_KEGG	E7_HPV16	RUVBL2	EIF4A2	-	-	-
MCI_KEGG	E7_HPV16	ALPL	PON1	L5452-168820	-	Organophosphate poisoning, sensitivity to (3)
MCI_KEGG	E7_HPV16	RNF2	ASMT	-	-	-
MCI_KEGG	E7_HPV16	PRMT5	UGT1A3	-	-	-
MCI_KEGG	E7_HPV16	RNF2	ALDH1A2	-	-	-
MCI_KEGG	E7_HPV16	PRMT5	UGT1A6	218800-191740	277.4	Crigler-Najjar syndrome, type I, 218800 (3)
MCI_KEGG	E7_HPV16	ALPL	RAD54B	L1614-604289	202.8	Lymphoma, non-Hodgkin (3)
MCI_KEGG	E7_HPV16	RUVBL2	DDX19A	-	-	-
MCI_KEGG	E7_HPV16	PLCB3	PTEN	L916-601728	182	Endometrial carcinoma (3)
MCI_KEGG	E7_HPV16	PLCB3	PTEN	276950-601728	759.89	VATER association with hydrocephalus, 276950 (3)
MCI_KEGG	E7_HPV16	ALPL	EP400	-	-	-
MCI_KEGG	E7_HPV16	ALPL	PTS	L2138-261640	270.1	Phenylketonuria due to PTS deficiency (3)
MCI_KEGG	E7_HPV16	RUVBL2	ATRX	300465-300032	319	Sutherland-Haan syndrome-like, 300465 (3)
MCI_KEGG	E7_HPV16	PRMT5	INMT	-	-	-
MCI_KEGG	E7_HPV16	RUVBL2	ERCC3	601675-133510	757.1	Trichothiodystrophy, 601675 (3)
MCI_KEGG	E7_HPV16	RUVBL2	ALPI	-	-	-
MCI_KEGG	E7_HPV16	ALPL	ERCC3	L2715-133510	757.33	Xeroderma pigmentosum, group B (3)
MCI_KEGG	E7_HPV16	ALPL	DDX41	-	-	-
MCI_KEGG	E7_HPV16	ALPL	RAD54L	L2827-603615	239.3	Breast cancer, invasive intraductal (3)
MCI_KEGG	E7_HPV16	PRMT5	HARS	-	-	-
MCI_KEGG	E7_HPV16	PRMT5	UGT2B15	-	-	-
MCI_KEGG	E7_HPV16	PLCB3	PTEN	L1558-601728	348.8	Lhermitte-Duclos syndrome (3)
MCI_KEGG	E7_HPV16	PRMT5	HAAO	-	-	-
MCI_KEGG	E7_HPV16	ALPL	DDX6	-	-	-
MCI_KEGG	E7_HPV16	ALPL	DDX1	-	-	-
MCI_KEGG	E7_HPV16	ALPL	ATRX	309490-300032	759.89	Chudley-Lowry syndrome, 309490 (3)
MCI_KEGG	E7_HPV16	RUVBL2	NUDT5	-	-	-
MCI_KEGG	E7_HPV16	ALPL	ATRX	L3120-300463	751.3	Golabi-Ito-Hall syndrome (3)
MCI_KEGG	E7_HPV16	PYGM	AMY2A	-	-	-
MCI_KEGG	E7_HPV16	ALPL	RAD54B	L576-604289	153	Colon adenocarcinoma (3)
MCI_KEGG	E7_HPV16	PLCB3	PNLIP	L4867-246600	-	Pancreatic lipase deficiency (1)
MCI_KEGG	E7_HPV16	ALPL	RAD54B	L3253-604289	202.8	Lymphoma, non-Hodgkin (3)
MCI_KEGG	E7_HPV16	ALPL	ATRX	309580-300032	759.89	Smith-Fineman-Myers syndrome, 309580 (3)
MCI_KEGG	E7_HPV16	ALPL	ATRX	300448-300032	282.49	Alpha-thalassemia myelodysplasia syndrome, somatic, 300448 (3)
MCI_KEGG	E7_HPV16	ALPL	RAD54L	L577-603615	153	Colon adenocarcinoma (3)
MCI_KEGG	E7_HPV16	PYGM	GYS1	611556-138570	-	Glycogen storage disease 0, muscle, 611556 (3)
MCI_KEGG	E7_HPV16	RUVBL2	GCH1	128230-600225	333.6	Dystonia, DOPA-responsive, 128230 (3)
MCI_KEGG	E7_HPV16	RUVBL2	GCH1	233910-600225	-	Phenylketonuria, atypical, due to GCH1 deficiency, 233910 (1)
MCI_KEGG	E7_HPV16	PYGM	PGM3	-	-	-
MCI_KEGG	E7_HPV16	PLCB3	PTEN	188470-601728	193	Thyroid carcinoma, follicular, 188470 (3)
MCI_KEGG	E7_HPV16	RUVBL2	ERCC2	278730-126340	757.33	Xeroderma pigmentosum, group D, 278730 (3)
MCI_KEGG	E7_HPV16	RUVBL2	DDX23	-	-	-
MCI_KEGG	E7_HPV16	PRMT5	AHCYL2	-	-	-
MCI_KEGG	E7_HPV16	PRMT5	UGT1A6	606785-191740	277.4	Crigler-Najjar syndrome, type II, 606785 (3)
MCI_KEGG	E7_HPV16	ALPL	RECQL5	-	-	-
MCI_KEGG	E7_HPV16	PLCB3	PTEN	607174-601728	237.6	Meningioma, 607174 (3)
MCI_KEGG	E7_HPV16	ALPL	ATRX	309590-300032	319	Juberg-Marsidi syndrome, 309590 (3)
MCI_KEGG	E7_HPV16	PLCB3	PPAP2A	-	-	-
MCI_KEGG	E7_HPV16	PLCB3	PTEN	L3235-601728	348.8	Lhermitte-Duclos syndrome (3)
MCI_KEGG	E7_HPV16	ALPL	PON2	L3748-602447	414	Coronary artery disease, susceptibility to (3)
MCI_KEGG	E7_HPV16	RUVBL2	ERCC2	214150-126340	759.89	Cerebrooculofacioskeletal syndrome, 214150 (3)
MCI_KEGG	E7_HPV16	RUVBL2	ENTPD7	-	-	-
MCI_KEGG	E7_HPV16	PLCB3	PNLIPRP2	-	-	-
MCI_KEGG	E7_HPV16	RNF2	ALDH3A2	270200-609523	757.1	Sjogren-Larsson syndrome, 270200 (3)
MCI_KEGG	E7_HPV16	RUVBL2	ALPP	L3691-108725	440.9	Atherosclerosis, susceptibility to (2)
MCI_KEGG	E7_HPV16	ALPL	ERCC3	601675-133510	757.1	Trichothiodystrophy, 601675 (3)
MCI_KEGG	E7_HPV16	PLCB3	INPP5K	-	-	-
MCI_KEGG	E7_HPV16	RNF2	ALDH1A1	-	-	-
MCI_KEGG	E7_HPV16	RUVBL2	FANCM	L3085-609644	284.09	Fanconi anemia, complementation group M (3)
MCI_KEGG	E7_HPV16	ALPL	ATP13A2	-	-	-
MCI_KEGG	E7_HPV16	ALPL	ERCC2	601675-126340	757.1	Trichothiodystrophy, 601675 (3)
MCI_KEGG	E7_HPV16	ALPL	ERCC2	214150-126340	759.89	Cerebrooculofacioskeletal syndrome, 214150 (3)
MCI_KEGG	E7_HPV16	ALPL	PON1	L3747-168820	414	Coronary artery disease, susceptibility to (3)
MCI_KEGG	E7_HPV16	ALPL	DDX19A	-	-	-
MCI_KEGG	E7_HPV16	PLCB3	PNPLA2	-	-	-
MCI_KEGG	E7_HPV16	ALPL	CHD1L	-	-	-
MCI_KEGG	E7_HPV16	RNF2	ALDH1B1	-	-	-
MCI_KEGG	E7_HPV16	ALPL	PON3	-	-	-
MCI_KEGG	E7_HPV16	RUVBL2	ERCC3	L2612-133510	757.1	Trichothiodystrophy (3)
MCI_KEGG	E7_HPV16	CAD	OTC	311250-300461	282.3	Ornithine transcarbamylase deficiency, 311250 (3)
MCI_KEGG	E7_HPV16	RUVBL2	DHX58	-	-	-
MCI_KEGG	E7_HPV16	PYGM	AMY2B	-	-	-
MCI_KEGG	E7_HPV16	ALPL	NUDT8	-	-	-
MCI_KEGG	E7_HPV16	PRMT5	HDC	-	-	-
MCI_KEGG	E7_HPV16	RUVBL2	ERCC3	L2715-133510	757.33	Xeroderma pigmentosum, group B (3)
MCI_KEGG	E7_HPV16	PLCB3	PTEN	158350-601728	759.6	Cowden disease, 158350 (3)
MCI_KEGG	E7_HPV16	PLCB3	PIP4K2A	-	-	-
MCI_KEGG	E7_HPV16	PYGM	PGM2	-	-	-
MCI_KEGG	E7_HPV16	ALPL	ASCC3	-	-	-
MCI_KEGG	E7_HPV16	PLCB3	PTEN	137800-601728	191.9	Oligodendroglioma, 137800 (3)
MCI_KEGG	E7_HPV16	RUVBL2	RAD54L	L347-603615	239.3	Breast cancer, invasive intraductal (3)
MCI_KEGG	E7_HPV16	RUVBL2	RECQL5	-	-	-
MCI_KEGG	E7_HPV16	CAD	CPS1	237300-608307	270.6	Carbamoylphosphate synthetase I deficiency, 237300 (3)
MCI_KEGG	E7_HPV16	RUVBL2	DHX9	-	-	-
MCI_KEGG	E7_HPV16	ALPL	DDX12	-	-	-
MCI_KEGG	E7_HPV16	RUVBL2	FBXO18	-	-	-
MCI_KEGG	E7_HPV16	PYGM	ENPP1	208000-173335	-	Arterial calcification, generalized, of infancy, 208000 (3)
MCI_KEGG	E7_HPV16	RUVBL2	ERCC2	601675-126340	757.1	Trichothiodystrophy, 601675 (3)
MCI_KEGG	E7_HPV16	ALPL	ERCC3	L2612-133510	757.1	Trichothiodystrophy (3)
MCI_KEGG	E7_HPV16	ALPL	SKIV2L2	-	-	-
MCI_KEGG	E7_HPV16	PLCB3	PNPLA3	-	-	-
MCI_KEGG	E7_HPV16	PYGM	AMY1B	-	-	-
MCI_KEGG	E7_HPV16	RUVBL2	SKIV2L2	-	-	-
MCI_KEGG	E7_HPV16	ALPL	ATP13A2	606693-610513	-	Parkinson disease 9, 606693 (3)
MCI_KEGG	E7_HPV16	PRMT5	MAT2A	-	-	-
MCI_KEGG	E7_HPV16	PRMT5	UGT2B10	-	-	-
MCI_KEGG	E7_HPV16	RUVBL2	ALPI	300716-300715	-	Mental retardation, X-linked 95, 300716 (3)
MCI_KEGG	E7_HPV16	ALPL	DDX54	-	-	-
MCI_KEGG	E7_HPV16	PLCB3	PIP5K1B	-	-	-
MCI_KEGG	E7_HPV16	ALPL	DHX15	-	-	-
MCI_KEGG	E7_HPV16	PRMT5	UGT2B28	-	-	-
MCI_KEGG	E7_HPV16	RUVBL2	DDX1	-	-	-
MCI_KEGG	E7_HPV16	PLCB3	PNLIPRP1	-	-	-
MCI_KEGG	E7_HPV16	PYGM	ENPP1	602475-173335	728.1	Ossification of posterior longitudinal ligament of spine, 602475 (3)
MCI_KEGG	E7_HPV16	PYGM	ENPP2	-	-	-
MCI_KEGG	E7_HPV16	PYGM	NUDT14	-	-	-
MCI_KEGG	E7_HPV16	ALPL	PON2	L671-602447	414	Coronary artery disease, susceptibility to (3)
MCI_KEGG	E7_HPV16	PLCB3	PTEN	153480-601728	756	Bannayan-Zonana syndrome, 153480 (3)
MCI_KEGG	E7_HPV16	PLCB3	LIPA	L530-278000	272.7	Cholesteryl ester storage disease (3)
MCI_KEGG	E7_HPV16	PRMT5	UGT1A7	-	-	-
MCI_KEGG	E7_HPV16	PYGM	GAA	232300-606800	271	Glycogen storage disease II, 232300 (3)
MCI_KEGG	E7_HPV16	RUVBL2	BLM	277700-604611	259.8	Werner syndrome, 277700 (3)
MCI_KEGG	E7_HPV16	PLCB3	LIPA	L2712-278000	272.7	Wolman disease (3)
MCI_KEGG	E7_HPV16	RUVBL2	DDX47	-	-	-
MCI_KEGG	E7_HPV16	PRMT5	UGT1A5	-	-	-
MCI_KEGG	E7_HPV16	PRMT5	UGT1A8	-	-	-
MCI_KEGG	E7_HPV16	PLCB3	PIP4K2C	-	-	-
MCI_KEGG	E7_HPV16	PRMT5	MAT2B	-	-	-
MCI_KEGG	E7_HPV16	PLCB3	PIK3CD	-	-	-
MCI_KEGG	E7_HPV16	RUVBL2	PTS	L2138-261640	270.1	Phenylketonuria due to PTS deficiency (3)
MCI_KEGG	E7_HPV16	RUVBL2	ATRX	309580-300032	759.89	Smith-Fineman-Myers syndrome, 309580 (3)
MCI_KEGG	E7_HPV16	PRMT5	MAT1A	L1302-250850	270.4	Hypermethioninemia, persistent, autosomal dominant, due to methionine adenosyltransferase I/III deficiency (3)
MCI_KEGG	E7_HPV16	ALPL	IFIH1	275000-606951	242	Graves disease, susceptibility to, 275000 (3)
MCI_KEGG	E7_HPV16	ALPL	DHX30	-	-	-
MCI_KEGG	E7_HPV16	PLCB3	LIPG	-	-	-
MCI_KEGG	E7_HPV16	RUVBL2	DDX55	-	-	-
MCI_KEGG	E7_HPV16	ALPL	IFIH1	610155-606951	-	Diabetes mellitus, insulin-dependent, susceptibility to, 610155 (3)
MCI_KEGG	E7_HPV16	RUVBL2	DDX46	-	-	-
MCI_KEGG	E7_HPV16	RUVBL2	NUDT8	-	-	-
MCI_KEGG	E7_HPV16	PRMT5	CYP7B1	231100-603711	774.4	Giant cell hepatitis, neonatal, 231100 (3)
MCI_KEGG	E7_HPV16	ALPL	RAD54L	L1615-603615	202.8	Lymphoma, non-Hodgkin (3)
MCI_KEGG	E7_HPV16	ALPL	LOC652522	-	-	-
MCI_KEGG	E7_HPV16	PLCB3	CEL	-	-	-
MCI_KEGG	E7_HPV16	PRMT5	CYP7B1	270800-603711	-	Spastic paraplegia-5A, 270800 (3)
MCI_KEGG	E7_HPV16	ALPL	RAD54L	L347-603615	239.3	Breast cancer, invasive intraductal (3)
MCI_KEGG	E7_HPV16	ALPL	GCH1	128230-600225	333.6	Dystonia, DOPA-responsive, 128230 (3)
MCI_KEGG	E7_HPV16	ALPL	GCH1	233910-600225	-	Phenylketonuria, atypical, due to GCH1 deficiency, 233910 (1)
MCI_KEGG	E7_HPV16	ALPL	DDX52	-	-	-
MCI_KEGG	E7_HPV16	RUVBL2	DNA2	-	-	-
MCI_KEGG	E7_HPV16	PLCB3	CEL	609812-114840	-	Maturity-onset diabetes of the young, type VIII, 609812 (3)
MCI_KEGG	E7_HPV16	ALPL	ENTPD7	-	-	-
MCI_KEGG	E7_HPV16	RUVBL2	DHX30	-	-	-
MCI_KEGG	E7_HPV16	PLCB3	PIK3CA	162900-171834	-	Nevus, epidermal, 162900 (3)
MCI_KEGG	E7_HPV16	PRMT5	DDC	608643-107930	277.6	Aromatic L-amino acid decarboxylase deficiency, 608643 (3)
MCI_KEGG	E7_HPV16	ALPL	PON1	L3749-168820	414	Coronary artery spasm, susceptibility to (3)
MCI_KEGG	E7_HPV16	ALPL	PON1	L670-168820	414	Coronary artery disease, susceptibility to (3)
MCI_KEGG	E7_HPV16	ALPL	FBXO18	-	-	-
MCI_KEGG	E7_HPV16	PLCB3	MINPP1	188470-605391	193	Thyroid carcinoma, follicular, 188470 (3)
MCI_KEGG	E7_HPV16	PRMT5	UGT1A1	237900-191740	782.4	Hyperbilirubinemia, familial transcient neonatal, 237900 (3)
MCI_KEGG	E7_HPV16	RNF2	ALDH7A1	-	-	-
MCI_KEGG	E7_HPV16	PLCB3	SYNJ2	-	-	-
MCI_KEGG	E7_HPV16	RUVBL2	RAD54L2	-	-	-
MCI_KEGG	E7_HPV16	PRMT5	UGT1A1	143500-191740	277.4	Gilbert syndrome, 143500 (3)
MCI_KEGG	E7_HPV16	PRMT5	UGT1A1	606785-191740	277.4	Crigler-Najjar syndrome, type II, 606785 (3)
MCI_KEGG	E7_HPV16	PLCB3	PIP5K1A	-	-	-
MCI_KEGG	E7_HPV16	RUVBL2	IFIH1	275000-606951	242	Graves disease, susceptibility to, 275000 (3)
MCI_KEGG	E7_HPV16	RNF2	ALDH7A1	107323-107323	-	Epilepsy, pyridoxine-dependent, 107323 (3)
MCI_KEGG	E7_HPV16	PRMT5	MAT1A	250850-610550	-	Methionine adenosyltransferase deficiency, autosomal recessive, 250850 (3)
MCI_KEGG	E7_HPV16	ALPL	DDX46	-	-	-
MCI_KEGG	E7_HPV16	ALPL	MOV10L1	-	-	-
MCI_KEGG	E7_HPV16	RUVBL2	TDRD9	-	-	-
MCI_KEGG	E7_HPV16	RUVBL2	BLM	210900-604610	757.39	Bloom syndrome, 210900 (3)
MCI_KEGG	E7_HPV16	ALPL	ATRX	300465-300032	319	Sutherland-Haan syndrome-like, 300465 (3)
MCI_KEGG	E7_HPV16	RNF2	ALDH2	L5493-100650	-	Sublingual nitroglycerin, susceptibility to poor response to (3)
MCI_KEGG	E7_HPV16	RUVBL2	DDX52	-	-	-
MCI_KEGG	E7_HPV16	PRMT5	UGT1A6	143500-191740	277.4	Gilbert syndrome, 143500 (3)
MCI_KEGG	E7_HPV16	ALPL	NUDT5	-	-	-
MCI_KEGG	E7_HPV16	RNF2	ALDH2	610251-100650	-	Hangover, susceptibility to, 610251 (3)
MCI_KEGG	E7_HPV16	PLCB3	LIPF	259700-607649	756.52	Osteopetrosis, autosomal recessive, 259700 (3)
MCI_KEGG	E7_HPV16	ALPL	DHX9	-	-	-
MCI_KEGG	E7_HPV16	PRMT5	CNDP1	-	-	-
MCI_KEGG	E7_HPV16	ALPL	WRN	277700-604611	259.8	Werner syndrome, 277700 (3)
MCI_KEGG	E7_HPV16	RNF2	ALDH2	L86-100650	291.4	Alcohol intolerance, acute (3)
MCI_KEGG	E7_HPV16	PLCB3	PTPMT1	-	-	-
MCI_KEGG	E7_HPV16	PYGM	GYS2	240600-138571	271	Glycogen storage disease, type 0, 240600 (3)
MCI_KEGG	E7_HPV16	PRMT5	CAT	L19-115500	277.89	Acatalasemia (3)
MCI_KEGG	E7_HPV16	PRMT5	IDO2	-	-	-
MCI_KEGG	E7_HPV16	ALPL	RUVBL1	-	-	-
MCI_KEGG	E7_HPV16	RUVBL2	WRN	277700-604611	259.8	Werner syndrome, 277700 (3)
MCI_KEGG	E7_HPV16	RUVBL2	SETX	602433-608465	-	Amyotrophic lateral sclerosis 4, juvenile, 602433 (3)
MCI_KEGG	E7_HPV16	ALPL	FANCM	L3085-609644	284.09	Fanconi anemia, complementation group M (3)
MCI_KEGG	E7_HPV16	ALPL	HELB	-	-	-
MCI_KEGG	E7_HPV16	CAD	DHODH	-	-	-
MCI_KEGG	E7_HPV16	RUVBL2	HELB	-	-	-
MCI_KEGG	E7_HPV16	PYGM	AMY1C	-	-	-
MCI_KEGG	E7_HPV16	PYGM	GYS1	-	-	-
MCI_KEGG	E7_HPV16	PLCB3	PIK3CA	114480-171834	239.3	Breast cancer, 114480 (3)
MCI_KEGG	E7_HPV16	RUVBL2	SMARCA2	-	-	-
MCI_KEGG	E7_HPV16	ALPL	ERCC2	278730-126340	757.33	Xeroderma pigmentosum, group D, 278730 (3)
MCI_KEGG	E7_HPV16	RUVBL2	RECQL4	268400-603780	757.33	Rothmund-Thomson syndrome, 268400 (3)
MCI_KEGG	E7_HPV16	PLCB3	OCRL	309000-300535	270.8	Lowe syndrome, 309000 (3)
MCI_KEGG	E7_HPV16	PRMT5	UGT2A3	-	-	-
MCI_KEGG	E7_HPV16	ALPL	DDX5	-	-	-
MCI_KEGG	E7_HPV16	ALPL	RECQL4	266280-603780	755.64	RAPADILINO syndrome, 266280 (3)
MCI_KEGG	E7_HPV16	RUVBL2	RAD54L	L1615-603615	202.8	Lymphoma, non-Hodgkin (3)
MCI_KEGG	E7_HPV16	PHGDH	PGAM4	-	-	-
MCI_KEGG	E7_HPV16	ALPL	RECQL4	268400-603780	757.33	Rothmund-Thomson syndrome, 268400 (3)
MCI_KEGG	E7_HPV16	ALPL	RECQL4	218600-603780	-	Baller-Gerold syndrome, 218600 (3)
MCI_KEGG	E7_HPV16	PLCB3	PIK3CB	-	-	-
MCI_KEGG	E7_HPV16	RUVBL2	FANCM	L1028-609644	284.09	Fanconi anemia, complementation group M (3)
MCI_KEGG	E7_HPV16	PRMT5	CYP7B1	L2817-603711	579.9	Bile acid synthesis defect, congenital, 3 (3)
MCI_KEGG	E7_HPV16	PLCB3	PIK3CA	211980-171834	162.9	Nonsmall cell lung cancer, somatic, 211980 (3)
MCI_KEGG	E7_HPV16	RUVBL2	LOC652522	-	-	-
MCI_KEGG	E7_HPV16	RUVBL2	DHX8	-	-	-
MCI_KEGG	E7_HPV16	PLCB3	PIP5K1C	611369-606102	-	Lethal congenital contractural syndrome 3, 611369 (3)
MCI_KEGG	E7_HPV16	PLCB3	PIP5K1C	-	-	-
MCI_KEGG	E7_HPV16	PYGM	MGAM	-	-	-
MCI_KEGG	E7_HPV16	RNF2	AOX1	-	-	-
MCI_KEGG	E7_HPV16	PRMT5	HAL	235800-609457	270.5	Histidinemia, 235800 (3)
MCI_KEGG	E7_HPV16	RUVBL2	DDX18	-	-	-
MCI_KEGG	E7_HPV16	ALPL	FANCM	L1028-609644	284.09	Fanconi anemia, complementation group M (3)
MCI_KEGG	E7_HPV16	PLCB3	PIK3CA	182000-171834	-	Keratosis, seborrheic, somatic, 182000 (3)
MCI_KEGG	E7_HPV16	ALPL	SETX	606002-608465	781.3	Ataxia-ocular apraxia-2, 606002 (3)
MCI_KEGG	E7_HPV16	ALPL	DDX47	-	-	-
MCI_KEGG	E7_HPV16	PRMT5	DTD1	-	-	-
MCI_KEGG	E7_HPV16	PRMT5	AANAT	L782-600950	307.4	Delayed sleep phase syndrome, susceptibility to (3)
MCI_KEGG	E7_HPV16	PRMT5	UGT1A1	218800-191740	277.4	Crigler-Najjar syndrome, type I, 218800 (3)
MCI_KEGG	E7_HPV16	PLCB3	PNPLA2	610717-609059	-	Neutral lipid storage disease with myopathy, 610717 (3)
MCI_KEGG	E7_HPV16	ALPL	SETX	602433-608465	-	Amyotrophic lateral sclerosis 4, juvenile, 602433 (3)
MCI_KEGG	E7_HPV16	ALPL	TDRD9	-	-	-
MCI_KEGG	E7_HPV16	RUVBL2	DDX11	-	-	-
MCI_KEGG	E7_HPV16	PRMT5	COQ7	-	-	-
MCI_KEGG	E7_HPV16	ALPL	RAD54L	L3254-603615	202.8	Lymphoma, non-Hodgkin (3)
MCI_KEGG	E7_HPV16	PRMT5	KYNU	-	-	-
MCI_KEGG	E7_HPV16	RUVBL2	DDX41	-	-	-
MCI_KEGG	E7_HPV16	RUVBL2	ALPPL2	602093-600364	362.75	Cone dystrophy-3, 602093 (3)
MCI_KEGG	E7_HPV16	PRMT5	MAOB	-	-	-
MCI_KEGG	E7_HPV16	PRMT5	UGT2A1	-	-	-
MCI_KEGG	E7_HPV16	PLCB3	PIP4K2B	-	-	-
MCI_KEGG	E7_HPV16	RNF2	ALDH9A1	-	-	-
MCI_KEGG	E7_HPV16	PLCB3	PIK3CA	137215-171834	151.9	Gastric cancer, somatic, 137215 (3)
MCI_KEGG	E7_HPV16	PLCB3	PIK3CA	114550-171834	211.5	Hepatocellular carcinoma, somatic, 114550 (3)
MCI_KEGG	E7_HPV16	PRMT5	IDO1	-	-	-
MCI_KEGG	E7_HPV16	RUVBL2	ALPL	241500-171760	275.3	Hypophosphatasia, infantile, 241500 (3)
MCI_KEGG	E7_HPV16	PRMT5	AANAT	L3763-600950	307.4	Delayed sleep phase syndrome, susceptibility to (3)
MCI_KEGG	E7_HPV16	RUVBL2	ALPL	241510-171760	275.3	Hypophosphatasia, childhood, 241510 (3)
MCI_KEGG	E7_HPV16	ALPL	PON1	L672-168820	414	Coronary artery spasm, susceptibility to (3)
MCI_KEGG	E7_HPV16	PLCB3	PTEN	176807-601728	185	Prostate cancer, 176807 (3)
MCI_KEGG	E7_HPV16	RUVBL2	CHD1L	-	-	-
MCI_KEGG	E7_HPV16	RUVBL2	SNRNP200	-	-	-
MCI_KEGG	E7_HPV16	ALPL	SMARCA5	-	-	-
MCI_KEGG	E7_HPV16	RUVBL2	DHX15	-	-	-
MCI_KEGG	E7_HPV16	ALPL	DHX8	-	-	-
MCI_KEGG	E7_HPV16	PLCB3	PIK3CA	114500-171834	153	Colorectal cancer, 114500 (3)
MCI_KEGG	E7_HPV16	ALPL	BLM	210900-604610	757.39	Bloom syndrome, 210900 (3)
MCI_KEGG	E7_HPV16	ALPL	ATRX	301040-300032	282.49	Alpha-thalassemia/mental retardation syndrome, 301040 (3)
MCI_KEGG	E7_HPV16	RUVBL2	DDX54	-	-	-
MCI_KEGG	E7_HPV16	RUVBL2	RECQL	-	-	-
MCI_KEGG	E7_HPV16	RUVBL2	SMARCA5	-	-	-
MCI_KEGG	E7_HPV16	PRMT5	UGT2B11	-	-	-
MCI_KEGG	E7_HPV16	RUVBL2	RECQL4	218600-603780	-	Baller-Gerold syndrome, 218600 (3)
MCI_KEGG	E7_HPV16	RUVBL2	SETX	606002-608465	781.3	Ataxia-ocular apraxia-2, 606002 (3)
MCI_KEGG	E7_HPV16	ALPL	DHX58	-	-	-
MCI_KEGG	E7_HPV16	RUVBL2	MOV10L1	-	-	-
MCI_KEGG	E7_HPV16	PRMT5	UGT2B7	-	-	-
MCI_KEGG	E7_HPV16	RUVBL2	RECQL4	266280-603780	755.64	RAPADILINO syndrome, 266280 (3)
MCI_KEGG	E7_HPV16	CDK2	NT5C3	266120-606224	285.9	Anemia, hemolytic, due to UMPH1 deficiency, 266120 (3)
MCI_KEGG	E7_HPV16	CDK2	NT5E	-	-	-
MCI_KEGG	E7_HPV16	CDC2	NT5C2	-	-	-
MCI_KEGG	E7_HPV16	CDC2	ENPP1	602475-173335	728.1	Ossification of posterior longitudinal ligament of spine, 602475 (3)
MCI_KEGG	E7_HPV16	CDC2	NT5C1A	-	-	-
MCI_KEGG	E7_HPV16	CDC2	NP	L3394-164050	334.3	Nucleoside phosphorylase deficiency, immunodeficiency due to (3)
MCI_KEGG	E7_HPV16	CDK2	ENPP1	601665-173335	278	Obesity, susceptibility to, 601665 (3)
MCI_KEGG	E7_HPV16	CDC2	NT5M	-	-	-
MCI_KEGG	E7_HPV16	CDC2	NMNAT3	-	-	-
MCI_KEGG	E7_HPV16	CDC2	ENPP1	125853-173335	250	Diabetes mellitus, non-insulin-dependent, susceptibility to, 125853 (3)
MCI_KEGG	E7_HPV16	CDK2	NT5C2	-	-	-
MCI_KEGG	E7_HPV16	CDK2	QPRT	-	-	-
MCI_KEGG	E7_HPV16	CDC2	ENPP1	601665-173335	278	Obesity, susceptibility to, 601665 (3)
MCI_KEGG	E7_HPV16	CDK2	ENPP3	-	-	-
MCI_KEGG	E7_HPV16	CDC2	NT5C3	266120-606224	285.9	Anemia, hemolytic, due to UMPH1 deficiency, 266120 (3)
MCI_KEGG	E7_HPV16	CDK2	NT5E	612020-603197	-	Spastic paraplegia 39, 612020 (3)
MCI_KEGG	E7_HPV16	CDC2	NP	L1965-164050	334.3	Nucleoside phosphorylase deficiency, immunodeficiency due to (3)
MCI_KEGG	E7_HPV16	CDC2	NT5E	612020-603197	-	Spastic paraplegia 39, 612020 (3)
MCI_KEGG	E7_HPV16	CDK2	ENPP1	602475-173335	728.1	Ossification of posterior longitudinal ligament of spine, 602475 (3)
MCI_KEGG	E7_HPV16	CDK2	ENPP1	125853-173335	250	Diabetes mellitus, non-insulin-dependent, susceptibility to, 125853 (3)
MCI_KEGG	E7_HPV16	CDC2	NT5E	-	-	-
MCI_KEGG	E7_HPV16	CDK2	NP	L1965-164050	334.3	Nucleoside phosphorylase deficiency, immunodeficiency due to (3)
MCI_KEGG	E7_HPV16	CDK2	ENPP1	208000-173335	-	Arterial calcification, generalized, of infancy, 208000 (3)
MCI_KEGG	E7_HPV16	CDK2	NMNAT3	-	-	-
MCI_KEGG	E7_HPV16	CDK2	NMNAT1	-	-	-
MCI_KEGG	E7_HPV16	CDK2	NUDT12	-	-	-
MCI_KEGG	E7_HPV16	CDC2	NMNAT1	-	-	-
MCI_KEGG	E7_HPV16	CDC2	NT5C	-	-	-
MCI_KEGG	E7_HPV16	CDK2	NT5C	-	-	-
MCI_KEGG	E7_HPV16	CDK2	NT5C1A	-	-	-
MCI_KEGG	E7_HPV16	CDC2	QPRT	-	-	-
MCI_KEGG	E7_HPV16	CDK2	ENPP2	-	-	-
MCI_KEGG	E7_HPV16	CDC2	ENPP1	208000-173335	-	Arterial calcification, generalized, of infancy, 208000 (3)
MCI_KEGG	E7_HPV16	CDC2	NMNAT2	-	-	-
MCI_KEGG	E7_HPV16	CDK2	NP	L3394-164050	334.3	Nucleoside phosphorylase deficiency, immunodeficiency due to (3)
MCI_KEGG	E7_HPV16	CDC2	NT5C1B	-	-	-
MCI_KEGG	E7_HPV16	CDC2	NUDT12	-	-	-
MCI_KEGG	E7_HPV16	CDC2	ENPP3	-	-	-
MCI_KEGG	E7_HPV16	CDK2	NMNAT2	-	-	-
MCI_KEGG	E7_HPV16	CDK2	NT5C1B	-	-	-
MCI_KEGG	E7_HPV16	CDK2	NT5M	-	-	-
MCI_KEGG	E7_HPV16	CDC2	ENPP2	-	-	-
MCI_KEGG	E7_HPV16	PKM2	POLG	271245-606075	-	Spinocerebellar ataxia, infantile-onset, 271245 (3)
MCI_KEGG	E7_HPV16	PKM2	POLR2B	-	-	-
MCI_KEGG	E7_HPV16	PKM2	AK5	-	-	-
MCI_KEGG	E7_HPV16	PKM2	POLR2D	-	-	-
MCI_KEGG	E7_HPV16	PKM2	ADCY2	-	-	-
MCI_KEGG	E7_HPV16	PKM2	POLR1C	-	-	-
MCI_KEGG	E7_HPV16	PKM2	POLR1A	-	-	-
MCI_KEGG	E7_HPV16	PKM2	RRM1	-	-	-
MCI_KEGG	E7_HPV16	PKM2	POLA1	-	-	-
MCI_KEGG	E7_HPV16	PKM2	PAPOLG	-	-	-
MCI_KEGG	E7_HPV16	PKM2	PAPD4	-	-	-
MCI_KEGG	E7_HPV16	PKM2	POLG	607459-606075	-	Sensory ataxia neuropathy, dysarthria, and ophthalmoparesis, 607459 (3)
MCI_KEGG	E7_HPV16	PKM2	POLD1	-	-	-
MCI_KEGG	E7_HPV16	PKM2	POLR2I	-	-	-
MCI_KEGG	E7_HPV16	PKM2	POLR2F	-	-	-
MCI_KEGG	E7_HPV16	PKM2	NME2	-	-	-
MCI_KEGG	E7_HPV16	PKM2	POLR3B	-	-	-
MCI_KEGG	E7_HPV16	PKM2	AK2	-	-	-
MCI_KEGG	E7_HPV16	PKM2	POLD2	-	-	-
MCI_KEGG	E7_HPV16	PKM2	ADCY1	-	-	-
MCI_KEGG	E7_HPV16	PKM2	NME4	-	-	-
MCI_KEGG	E7_HPV16	PKM2	ZNRD1	-	-	-
MCI_KEGG	E7_HPV16	PKM2	POLR3H	-	-	-
MCI_KEGG	E7_HPV16	PKM2	CANT1	-	-	-
MCI_KEGG	E7_HPV16	PKM2	POLR1B	-	-	-
MCI_KEGG	E7_HPV16	PKM2	AK1	L1190-103000	283.9	Hemolytic anemia due to adenylate kinase deficiency (3)
MCI_KEGG	E7_HPV16	PKM2	POLE2	-	-	-
MCI_KEGG	E7_HPV16	PKM2	ADCY7	-	-	-
MCI_KEGG	E7_HPV16	PKM2	INO80	-	-	-
MCI_KEGG	E7_HPV16	PKM2	POLRMT	-	-	-
MCI_KEGG	E7_HPV16	PKM2	RRM2	-	-	-
MCI_KEGG	E7_HPV16	PKM2	POLR3A	-	-	-
MCI_KEGG	E7_HPV16	PKM2	NME1	256700-156490	194	Neuroblastoma, 256700 (3)
MCI_KEGG	E7_HPV16	PKM2	ENTPD2	-	-	-
MCI_KEGG	E7_HPV16	PKM2	POLS	-	-	-
MCI_KEGG	E7_HPV16	PKM2	POLR2C	-	-	-
MCI_KEGG	E7_HPV16	PKM2	PAPOLB	-	-	-
MCI_KEGG	E7_HPV16	PKM2	ATP1B1	145500-182330	-	Blood pressure regulation QTL, 145500 (2)
MCI_KEGG	E7_HPV16	PKM2	ATP1B1	-	-	-
MCI_KEGG	E7_HPV16	PKM2	ADCY3	-	-	-
MCI_KEGG	E7_HPV16	PKM2	POLR2H	-	-	-
MCI_KEGG	E7_HPV16	PKM2	POLL	-	-	-
MCI_KEGG	E7_HPV16	PKM2	POLG	157640-174763	334.3	Sensory ataxic neuropathy, dysarthria, and ophthalmoparesis, 157640 (3)
MCI_KEGG	E7_HPV16	PKM2	ADCY9	-	-	-
MCI_KEGG	E7_HPV16	PKM2	POLE3	-	-	-
MCI_KEGG	E7_HPV16	PKM2	POLR2L	-	-	-
MCI_KEGG	E7_HPV16	PKM2	ADCY4	-	-	-
MCI_KEGG	E7_HPV16	PKM2	ENTPD8	-	-	-
MCI_KEGG	E7_HPV16	PKM2	ADCY10	143870-605205	275.4	Hypercalciuria, absorptive, susceptibility to, 143870 (3)
MCI_KEGG	E7_HPV16	PKM2	POLA1	310465-312040	-	N syndrome, 310465 (1) ()
MCI_KEGG	E7_HPV16	PKM2	ADCY5	-	-	-
MCI_KEGG	E7_HPV16	PKM2	ADCY8	-	-	-
MCI_KEGG	E7_HPV16	PKM2	ENTPD1	-	-	-
MCI_KEGG	E7_HPV16	PKM2	ITPA	L5234-147520	-	Inosine triphosphatase deficiency (3)
MCI_KEGG	E7_HPV16	PKM2	ADCY6	-	-	-
MCI_KEGG	E7_HPV16	PKM2	POLR2K	-	-	-
MCI_KEGG	E7_HPV16	PKM2	POLG	157640-174763	359.1	Sensory ataxic neuropathy, dysarthria, and ophthalmoparesis, 157640 (3)
MCI_KEGG	E7_HPV16	PKM2	POLR3K	-	-	-
MCI_KEGG	E7_HPV16	PKM2	POLG	203700-174763	330.8	Alpers syndrome, 203700 (3)
MCI_KEGG	E7_HPV16	PKM2	POLG	157640-606075	359.1	Progressive external ophthalmoplegia with mitochondrial DNA deletions, 157640 (3)
MCI_KEGG	E7_HPV16	PKM2	POLE	-	-	-
MCI_KEGG	E7_HPV16	PKM2	POLR1D	-	-	-
MCI_KEGG	E7_HPV16	PKM2	REV3L	-	-	-
MCI_KEGG	E7_HPV16	PKM2	NME6	-	-	-
MCI_KEGG	E7_HPV16	PKM2	POLR3D	-	-	-
MCI_KEGG	E7_HPV16	PKM2	POLB	-	-	-
MCI_KEGG	E7_HPV16	PKM2	POLR2A	-	-	-
MCI_KEGG	E7_HPV16	PKM2	POLM	-	-	-
MCI_KEGG	E7_HPV16	PKM2	POLR3G	-	-	-
MCI_KEGG	E7_HPV16	PKM2	RRM2B	612075-604712	-	Mitochondrial DNA depletion syndrome, encephalomyopathic form, with renal tubulopathy, 612075 (3)
MCI_KEGG	E7_HPV16	PKM2	PKLR	L149-266200	285.9	Anemia, hemolytic, due to PK deficiency (3)
MCI_KEGG	E7_HPV16	PKM2	ENTPD3	158000-601928	757.4	Monilethrix, 158000 (3)
MCI_KEGG	E7_HPV16	PKM2	POLH	278750-603968	757.33	Xeroderma pigmentosum, variant type, 278750 (3)
MCI_KEGG	E7_HPV16	PKM2	NUDT2	-	-	-
MCI_KEGG	E7_HPV16	PKM2	POLR1E	-	-	-
MCI_KEGG	E7_HPV16	PKM2	GUK1	-	-	-
MCI_KEGG	E7_HPV16	PKM2	POLK	-	-	-
MCI_KEGG	E7_HPV16	PKM2	POLR2J	-	-	-
MCI_KEGG	E7_HPV16	PKM2	RRM2B	-	-	-
MCI_KEGG	E7_HPV16	PKM2	POLG	251880-606075	-	Mitochondrial DNA depletion syndrome, hepatocerebral form, 251880 (3)
MCI_KEGG	E7_HPV16	PKM2	POLE4	-	-	-
MCI_KEGG	E7_HPV16	PKM2	AK3L1	-	-	-
MCI_KEGG	E7_HPV16	PKM2	NME7	-	-	-
MCI_KEGG	E7_HPV16	PKM2	POLR2E	-	-	-
MCI_KEGG	E7_HPV16	PKM2	PKLR	266200-609712	-	Pyruvate kinase deficiency, 266200 (3)
MCI_KEGG	E7_HPV16	PKM2	POLR2G	-	-	-
MCI_KEGG	E7_HPV16	PKM2	POLR3GL	-	-	-
MCI_KEGG	E7_HPV16	PKM2	POLI	-	-	-
MCI_KEGG	E7_HPV16	PKM2	MYBBP1A	-	-	-
MCI_KEGG	E7_HPV16	PKM2	PAPOLA	-	-	-
MCI_KEGG	E7_HPV16	PKM2	POLQ	-	-	-
MCI_KEGG	E7_HPV16	PKM2	AK7	-	-	-
MCI_KEGG	E7_HPV16	PKM2	ITPA	-	-	-
MCI_KEGG	E7_HPV16	PKM2	POLG	607459-174763	-	Spinocerebellar ataxia with epilepsy, 607459 (3)
MCI_FluxCoupling|KEGG	E7_HPV16	PFKL	PFKM	L1139-232800	271	Glycogen storage disease VII (3)
MCI_FluxCoupling|KEGG	E7_HPV16	PFKL	PFKP	-	-	-
MCI_FluxCoupling|KEGG	E7_HPV16	PFKL	PFKM	232800-610681	-	Glycogen storage disease VII, 232800 (3)
MCI_BiGG|KEGG	E7_HPV16	PLCB3	SYNJ1	-	-	-
MCI_BiGG|KEGG	E7_HPV16	PHGDH	ACYP2	-	-	-
MCI_BiGG|KEGG	E7_HPV16	PLCB3	DGKE	-	-	-
MCI_BiGG|KEGG	E7_HPV16	PLCB3	DGKD	-	-	-
MCI_BiGG|KEGG	E7_HPV16	PHGDH	PGK1	L1865-311800	791.3	Myoglobinuria/hemolysis due to PGK deficiency (3)
MCI_BiGG|KEGG	E7_HPV16	PHGDH	BPGM	L1192-222800	283.9	Hemolytic anemia due to bisphosphoglycerate mutase deficiency (3)
MCI_BiGG|KEGG	E7_HPV16	PLCB3	DGKH	-	-	-
MCI_BiGG|KEGG	E7_HPV16	PHGDH	PGAM2	L1877-261670	359.9	Myopathy due to phosphoglycerate mutase deficiency (3)
MCI_BiGG|KEGG	E7_HPV16	PLCB3	ITPKA	-	-	-
MCI_BiGG|KEGG	E7_HPV16	PLCB3	INPP5E	-	-	-
[truncated: 67 more rows]
