# Supplementary material for: Viral Perturbations of Host Networks Reflect Disease Etiology
Source: PLoS Comput Biol. 2012 Jun 28;8(6):e1002531. doi: 10.1371/journal.pcbi.1002531 (PMC3386155; doi:10.1371/journal.pcbi.1002531)
Supplement: Dataset S3 — Relative risk analysis. (Sheet 1, 3) relative risk between EBV- and HPV-implicated diseases and candidate diseases in the disease network. (Sheet 2, 4) relative risk between EBV- and HPV-implicated diseases and all mappable diseases which constitute the random control. (XLS) [file pcbi.1002531.s003.xls]

## Sheet: EBV
EBV disease network candidate diseases (3 digit) and EBV-implicated diseases
EBV-implicated disease code	EBV-implicated disease name	Candidate disease code	Candidate disease name	RR (calculated)	RR (corrected)	Log(RR_corrected)
075	Infectious mononucleosis	094	Neurosyphilis	2.61172	1	0
075	Infectious mononucleosis	147	Malignant neoplasm of nasopharynx		1	0
075	Infectious mononucleosis	151	Malignant neoplasm of stomach	0.501857	1	0
075	Infectious mononucleosis	153	Malignant neoplasm of colon	0.455484	1	0
075	Infectious mononucleosis	157	Malignant neoplasm of pancreas	0.490905	1	0
075	Infectious mononucleosis	161	Malignant neoplasm of larynx		1	0
075	Infectious mononucleosis	162	Malignant neoplasm of trachea, bronchus, and lung	0.639047	1	0
075	Infectious mononucleosis	170	Malignant neoplasm of bone and articular cartilage		1	0
075	Infectious mononucleosis	171	Malignant neoplasm of connective and other soft tissue		1	0
075	Infectious mononucleosis	172	Malignant melanoma of skin		1	0
075	Infectious mononucleosis	173	Other malignant neoplasm of skin	0.328637	1	0
075	Infectious mononucleosis	176	Kaposi's sarcoma		1	0
075	Infectious mononucleosis	183	Malignant neoplasm of ovary and other uterine adnexa		1	0
075	Infectious mononucleosis	185	Malignant neoplasm of prostate	0.567924	1	0
075	Infectious mononucleosis	186	Malignant neoplasm of testis		1	0
075	Infectious mononucleosis	188	Malignant neoplasm of bladder	0.771183	1	0
075	Infectious mononucleosis	190	Malignant neoplasm of eye	4.65309	1	0
075	Infectious mononucleosis	191	Malignant neoplasm of brain		1	0
075	Infectious mononucleosis	193	Malignant neoplasm of thyroid gland	1.64475	1	0
075	Infectious mononucleosis	194	Malignant neoplasm of other endocrine glands and related structures		1	0
075	Infectious mononucleosis	200	Lymphosarcoma and reticulosarcoma and other specified malignant tumors of lymphatic tissue	3.60438	3.60438	1.28215
075	Infectious mononucleosis	202	Other malignant neoplasms of lymphoid and histiocytic tissue	4.66111	4.66111	1.53925
075	Infectious mononucleosis	203	Multiple myeloma and immunoproliferative neoplasms	1.48157	1	0
075	Infectious mononucleosis	204	Lymphoid leukemia	4.87332	4.87332	1.58378
075	Infectious mononucleosis	207	Other specified leukemia	48.713	48.713	3.88595
075	Infectious mononucleosis	208	Leukemia of unspecified cell type	7.40688	7.40688	2.00241
075	Infectious mononucleosis	211	Benign neoplasm of other parts of digestive system	1.35031	1	0
075	Infectious mononucleosis	216	Benign neoplasm of skin		1	0
075	Infectious mononucleosis	237	Neoplasm of uncertain behavior of endocrine glands and nervous system		1	0
075	Infectious mononucleosis	238	Neoplasm of uncertain behavior of other and unspecified sites and tissues	4.22165	4.22165	1.44023
075	Infectious mononucleosis	239	Neoplasms of unspecified nature	1.54615	1	0
075	Infectious mononucleosis	244	Acquired hypothyroidism	1.82861	1.82861	0.603556
075	Infectious mononucleosis	250	Diabetes mellitus	0.998802	1	0
075	Infectious mononucleosis	251	Other disorders of pancreatic internal secretion	1.35179	1	0
075	Infectious mononucleosis	255	Disorders of adrenal glands	3.72323	3.72323	1.31459
075	Infectious mononucleosis	259	Other endocrine disorders		1	0
075	Infectious mononucleosis	260	Kwashiorkor	3.88632	1	0
075	Infectious mononucleosis	268	Vitamin D deficiency		1	0
075	Infectious mononucleosis	270	Disorders of amino-acid transport and metabolism	13.8838	13.8838	2.63072
075	Infectious mononucleosis	271	Disorders of carbohydrate transport and metabolism	1.94755	1	0
075	Infectious mononucleosis	272	Disorders of lipoid metabolism	1.42065	1.42065	0.351113
075	Infectious mononucleosis	275	Disorders of mineral metabolism	2.00819	2.00819	0.697236
075	Infectious mononucleosis	276	Disorders of fluid, electrolyte, and acid-base balance	1.6179	1.6179	0.481126
075	Infectious mononucleosis	277	Other and unspecified disorders of metabolism	2.5767	1	0
075	Infectious mononucleosis	279	Disorders involving the immune mechanism	12.2023	12.2023	2.50162
075	Infectious mononucleosis	281	Other deficiency anemias	1.89248	1.89248	0.637888
075	Infectious mononucleosis	282	Hereditary hemolytic anemias	6.89149	6.89149	1.93029
075	Infectious mononucleosis	283	Acquired hemolytic anemias	7.59709	7.59709	2.02776
075	Infectious mononucleosis	284	Aplastic anemia and other bone marrow failure syndromes	4.37086	4.37086	1.47496
075	Infectious mononucleosis	285	Other and unspecified anemias	1.05027	1	0
075	Infectious mononucleosis	286	Coagulation defects	1.98029	1.98029	0.683244
075	Infectious mononucleosis	287	Purpura and other hemorrhagic conditions	3.40657	3.40657	1.22571
075	Infectious mononucleosis	288	Diseases of white blood cells	5.99675	5.99675	1.79122
075	Infectious mononucleosis	289	Other diseases of blood and blood-forming organs	4.69586	4.69586	1.54668
075	Infectious mononucleosis	330	Cerebral degenerations usually manifest in childhood		1	0
075	Infectious mononucleosis	331	Other cerebral degenerations	0.894475	1	0
075	Infectious mononucleosis	332	Parkinson's disease	0.928913	1	0
075	Infectious mononucleosis	333	Other extrapyramidal disease and abnormal movement disorders	2.08397	1	0
075	Infectious mononucleosis	334	Spinocerebellar disease	1.398	1	0
075	Infectious mononucleosis	335	Anterior horn cell disease	1.30153	1	0
075	Infectious mononucleosis	355	Mononeuritis of lower limb	2.89797	2.89797	1.06401
075	Infectious mononucleosis	356	Hereditary and idiopathic peripheral neuropathy	2.79328	2.79328	1.02722
075	Infectious mononucleosis	362	Other retinal disorders	0.974709	1	0
075	Infectious mononucleosis	365	Glaucoma	0.605715	1	0
075	Infectious mononucleosis	366	Cataract	1.12865	1	0
075	Infectious mononucleosis	370	Keratitis	1.34836	1	0
075	Infectious mononucleosis	371	Corneal opacity and other disorders of cornea	1.34394	1	0
075	Infectious mononucleosis	374	Other disorders of eyelids	1.44935	1	0
075	Infectious mononucleosis	377	Disorders of optic nerve and visual pathways	3.65884	1	0
075	Infectious mononucleosis	401	Essential hypertension	1.027	1	0
075	Infectious mononucleosis	425	Cardiomyopathy	0.858816	1	0
075	Infectious mononucleosis	492	Emphysema	1.42155	1	0
075	Infectious mononucleosis	515	Postinflammatory pulmonary fibrosis	1.59825	1	0
075	Infectious mononucleosis	523	Gingival and periodontal diseases	1.55052	1	0
075	Infectious mononucleosis	555	Regional enteritis	1.654	1	0
075	Infectious mononucleosis	569	Other disorders of intestine	1.36648	1	0
075	Infectious mononucleosis	587	Renal sclerosis, unspecified		1	0
075	Infectious mononucleosis	695	Erythematous conditions	6.53614	6.53614	1.87735
075	Infectious mononucleosis	706	Diseases of sebaceous glands	0.923259	1	0
075	Infectious mononucleosis	709	Other disorders of skin and subcutaneous tissue	1.33253	1	0
075	Infectious mononucleosis	714	Rheumatoid arthritis and other inflammatory polyarthropathies	1.2489	1	0
075	Infectious mononucleosis	720	Ankylosing spondylitis and other inflammatory spondylopathies	2.24645	1	0
075	Infectious mononucleosis	728	Disorders of muscle, ligament, and fascia	1.6026	1	0
075	Infectious mononucleosis	733	Other disorders of bone and cartilage	0.898844	1	0
075	Infectious mononucleosis	743	Congenital anomalies of eye		1	0
075	Infectious mononucleosis	744	Congenital anomalies of ear, face, and neck		1	0
075	Infectious mononucleosis	755	Other congenital anomalies of limbs		1	0
075	Infectious mononucleosis	756	Other congenital musculoskeletal anomalies	2.10043	1	0
075	Infectious mononucleosis	757	Congenital anomalies of the integument	6.48612	1	0
075	Infectious mononucleosis	758	Chromosomal anomalies		1	0
075	Infectious mononucleosis	759	Other and unspecified congenital anomalies	8.97508	8.97508	2.19445
075	Infectious mononucleosis	781	Symptoms involving nervous and musculoskeletal systems	0.857286	1	0
075	Infectious mononucleosis	995	Certain adverse effects not elsewhere classified	1.7309	1	0
142	Malignant neoplasm of major salivary glands	094	Neurosyphilis	1.13174	1	0
142	Malignant neoplasm of major salivary glands	147	Malignant neoplasm of nasopharynx	31.3821	31.3821	3.44624
142	Malignant neoplasm of major salivary glands	151	Malignant neoplasm of stomach	0.326207	1	0
142	Malignant neoplasm of major salivary glands	153	Malignant neoplasm of colon	0.620326	0.620326	-0.47751
142	Malignant neoplasm of major salivary glands	157	Malignant neoplasm of pancreas	0.957265	1	0
142	Malignant neoplasm of major salivary glands	161	Malignant neoplasm of larynx	3.33663	3.33663	1.20496
142	Malignant neoplasm of major salivary glands	162	Malignant neoplasm of trachea, bronchus, and lung	1.56922	1.56922	0.450576
142	Malignant neoplasm of major salivary glands	170	Malignant neoplasm of bone and articular cartilage	24.375	24.375	3.19356
142	Malignant neoplasm of major salivary glands	171	Malignant neoplasm of connective and other soft tissue	20.8525	20.8525	3.03747
142	Malignant neoplasm of major salivary glands	172	Malignant melanoma of skin	6.93305	6.93305	1.9363
142	Malignant neoplasm of major salivary glands	173	Other malignant neoplasm of skin	23.7111	23.7111	3.16595
142	Malignant neoplasm of major salivary glands	176	Kaposi's sarcoma	3.66563	1	0
142	Malignant neoplasm of major salivary glands	183	Malignant neoplasm of ovary and other uterine adnexa	0.30303	1	0
142	Malignant neoplasm of major salivary glands	185	Malignant neoplasm of prostate	0.915185	1	0
142	Malignant neoplasm of major salivary glands	186	Malignant neoplasm of testis	6.95637	1	0
142	Malignant neoplasm of major salivary glands	188	Malignant neoplasm of bladder	0.751903	1	0
142	Malignant neoplasm of major salivary glands	190	Malignant neoplasm of eye	8.06536	8.06536	2.08758
142	Malignant neoplasm of major salivary glands	191	Malignant neoplasm of brain	2.16856	1	0
142	Malignant neoplasm of major salivary glands	193	Malignant neoplasm of thyroid gland	1.42545	1	0
142	Malignant neoplasm of major salivary glands	194	Malignant neoplasm of other endocrine glands and related structures	10.9249	10.9249	2.39105
142	Malignant neoplasm of major salivary glands	200	Lymphosarcoma and reticulosarcoma and other specified malignant tumors of lymphatic tissue	2.86348	2.86348	1.05204
142	Malignant neoplasm of major salivary glands	202	Other malignant neoplasms of lymphoid and histiocytic tissue	3.70299	3.70299	1.30914
142	Malignant neoplasm of major salivary glands	203	Multiple myeloma and immunoproliferative neoplasms	0.856019	1	0
142	Malignant neoplasm of major salivary glands	204	Lymphoid leukemia	2.88609	2.88609	1.0599
142	Malignant neoplasm of major salivary glands	207	Other specified leukemia	5.27725	1	0
142	Malignant neoplasm of major salivary glands	208	Leukemia of unspecified cell type	2.00603	1	0
142	Malignant neoplasm of major salivary glands	211	Benign neoplasm of other parts of digestive system	0.571201	0.571201	-0.560014
142	Malignant neoplasm of major salivary glands	216	Benign neoplasm of skin	11.3697	11.3697	2.43096
142	Malignant neoplasm of major salivary glands	237	Neoplasm of uncertain behavior of endocrine glands and nervous system	2.02033	1	0
142	Malignant neoplasm of major salivary glands	238	Neoplasm of uncertain behavior of other and unspecified sites and tissues	1.70742	1.70742	0.534986
142	Malignant neoplasm of major salivary glands	239	Neoplasms of unspecified nature	4.52249	4.52249	1.50906
142	Malignant neoplasm of major salivary glands	244	Acquired hypothyroidism	0.857705	1	0
142	Malignant neoplasm of major salivary glands	250	Diabetes mellitus	0.777098	0.777098	-0.252189
142	Malignant neoplasm of major salivary glands	251	Other disorders of pancreatic internal secretion	0.683405	1	0
142	Malignant neoplasm of major salivary glands	255	Disorders of adrenal glands	0.985968	1	0
142	Malignant neoplasm of major salivary glands	259	Other endocrine disorders		1	0
142	Malignant neoplasm of major salivary glands	260	Kwashiorkor	1.96475	1	0
142	Malignant neoplasm of major salivary glands	268	Vitamin D deficiency		1	0
142	Malignant neoplasm of major salivary glands	270	Disorders of amino-acid transport and metabolism	3.00816	1	0
142	Malignant neoplasm of major salivary glands	271	Disorders of carbohydrate transport and metabolism	0.506364	1	0
142	Malignant neoplasm of major salivary glands	272	Disorders of lipoid metabolism	0.559255	0.559255	-0.58115
142	Malignant neoplasm of major salivary glands	275	Disorders of mineral metabolism	1.5954	1.5954	0.467123
142	Malignant neoplasm of major salivary glands	276	Disorders of fluid, electrolyte, and acid-base balance	0.944687	1	0
142	Malignant neoplasm of major salivary glands	277	Other and unspecified disorders of metabolism	1.11657	1	0
142	Malignant neoplasm of major salivary glands	279	Disorders involving the immune mechanism	1.88845	1	0
142	Malignant neoplasm of major salivary glands	281	Other deficiency anemias	0.92704	1	0
142	Malignant neoplasm of major salivary glands	282	Hereditary hemolytic anemias	0.829531	1	0
142	Malignant neoplasm of major salivary glands	283	Acquired hemolytic anemias	1.48143	1	0
142	Malignant neoplasm of major salivary glands	284	Aplastic anemia and other bone marrow failure syndromes	2.42016	2.42016	0.883834
142	Malignant neoplasm of major salivary glands	285	Other and unspecified anemias	0.93119	1	0
142	Malignant neoplasm of major salivary glands	286	Coagulation defects	1.28719	1	0
142	Malignant neoplasm of major salivary glands	287	Purpura and other hemorrhagic conditions	1.30585	1	0
142	Malignant neoplasm of major salivary glands	288	Diseases of white blood cells	2.22736	2.22736	0.800819
142	Malignant neoplasm of major salivary glands	289	Other diseases of blood and blood-forming organs	1.15015	1	0
142	Malignant neoplasm of major salivary glands	330	Cerebral degenerations usually manifest in childhood		1	0
142	Malignant neoplasm of major salivary glands	331	Other cerebral degenerations	0.516808	0.516808	-0.660085
142	Malignant neoplasm of major salivary glands	332	Parkinson's disease	0.550123	0.550123	-0.597614
142	Malignant neoplasm of major salivary glands	333	Other extrapyramidal disease and abnormal movement disorders	0.852885	1	0
142	Malignant neoplasm of major salivary glands	334	Spinocerebellar disease	0.6058	1	0
142	Malignant neoplasm of major salivary glands	335	Anterior horn cell disease	1.69199	1	0
142	Malignant neoplasm of major salivary glands	355	Mononeuritis of lower limb	0.98669	1	0
142	Malignant neoplasm of major salivary glands	356	Hereditary and idiopathic peripheral neuropathy	0.95825	1	0
142	Malignant neoplasm of major salivary glands	362	Other retinal disorders	0.516235	0.516235	-0.661194
142	Malignant neoplasm of major salivary glands	365	Glaucoma	0.813677	1	0
142	Malignant neoplasm of major salivary glands	366	Cataract	0.886463	1	0
142	Malignant neoplasm of major salivary glands	370	Keratitis	7.01148	7.01148	1.94755
142	Malignant neoplasm of major salivary glands	371	Corneal opacity and other disorders of cornea	1.89271	1	0
142	Malignant neoplasm of major salivary glands	374	Other disorders of eyelids	25.7501	25.7501	3.24844
142	Malignant neoplasm of major salivary glands	377	Disorders of optic nerve and visual pathways	0.792749	1	0
142	Malignant neoplasm of major salivary glands	401	Essential hypertension	0.998691	1	0
142	Malignant neoplasm of major salivary glands	425	Cardiomyopathy	0.655699	0.655699	-0.422054
142	Malignant neoplasm of major salivary glands	492	Emphysema	1.15709	1	0
142	Malignant neoplasm of major salivary glands	515	Postinflammatory pulmonary fibrosis	1.1333	1	0
142	Malignant neoplasm of major salivary glands	523	Gingival and periodontal diseases	5.71108	5.71108	1.74241
142	Malignant neoplasm of major salivary glands	555	Regional enteritis	0.597276	1	0
142	Malignant neoplasm of major salivary glands	569	Other disorders of intestine	0.666159	0.666159	-0.406227
142	Malignant neoplasm of major salivary glands	587	Renal sclerosis, unspecified		1	0
142	Malignant neoplasm of major salivary glands	695	Erythematous conditions	1.41616	1	0
142	Malignant neoplasm of major salivary glands	706	Diseases of sebaceous glands	2.00039	1	0
142	Malignant neoplasm of major salivary glands	709	Other disorders of skin and subcutaneous tissue	3.60893	3.60893	1.28341
142	Malignant neoplasm of major salivary glands	714	Rheumatoid arthritis and other inflammatory polyarthropathies	0.716279	1	0
142	Malignant neoplasm of major salivary glands	720	Ankylosing spondylitis and other inflammatory spondylopathies	0.730095	1	0
142	Malignant neoplasm of major salivary glands	728	Disorders of muscle, ligament, and fascia	0.733043	1	0
142	Malignant neoplasm of major salivary glands	733	Other disorders of bone and cartilage	0.799498	0.799498	-0.223771
142	Malignant neoplasm of major salivary glands	743	Congenital anomalies of eye		1	0
142	Malignant neoplasm of major salivary glands	744	Congenital anomalies of ear, face, and neck	17.8213	17.8213	2.88039
142	Malignant neoplasm of major salivary glands	755	Other congenital anomalies of limbs		1	0
142	Malignant neoplasm of major salivary glands	756	Other congenital musculoskeletal anomalies	0.303395	1	0
142	Malignant neoplasm of major salivary glands	757	Congenital anomalies of the integument		1	0
142	Malignant neoplasm of major salivary glands	758	Chromosomal anomalies	3.0126	1	0
142	Malignant neoplasm of major salivary glands	759	Other and unspecified congenital anomalies	1.9446	1	0
142	Malignant neoplasm of major salivary glands	781	Symptoms involving nervous and musculoskeletal systems	0.78013	1	0
142	Malignant neoplasm of major salivary glands	995	Certain adverse effects not elsewhere classified	0.61612	1	0
147	Malignant neoplasm of nasopharynx	094	Neurosyphilis		1	0
147	Malignant neoplasm of nasopharynx	151	Malignant neoplasm of stomach	1.89972	1	0
147	Malignant neoplasm of nasopharynx	153	Malignant neoplasm of colon	0.738933	1	0
147	Malignant neoplasm of nasopharynx	155	Malignant neoplasm of liver and intrahepatic bile ducts	1.78626	1	0
147	Malignant neoplasm of nasopharynx	157	Malignant neoplasm of pancreas	2.16797	1	0
147	Malignant neoplasm of nasopharynx	161	Malignant neoplasm of larynx	34.3288	34.3288	3.53598
147	Malignant neoplasm of nasopharynx	162	Malignant neoplasm of trachea, bronchus, and lung	2.73261	2.73261	1.00526
147	Malignant neoplasm of nasopharynx	164	Malignant neoplasm of thymus, heart, and mediastinum	4.21795	1	0
147	Malignant neoplasm of nasopharynx	170	Malignant neoplasm of bone and articular cartilage	42.2474	42.2474	3.74354
147	Malignant neoplasm of nasopharynx	171	Malignant neoplasm of connective and other soft tissue	10.1198	10.1198	2.3145
147	Malignant neoplasm of nasopharynx	172	Malignant melanoma of skin	4.03756	4.03756	1.39564
147	Malignant neoplasm of nasopharynx	173	Other malignant neoplasm of skin	4.56138	4.56138	1.51763
147	Malignant neoplasm of nasopharynx	174	Malignant neoplasm of female breast	1.17812	1	0
147	Malignant neoplasm of nasopharynx	176	Kaposi's sarcoma		1	0
147	Malignant neoplasm of nasopharynx	183	Malignant neoplasm of ovary and other uterine adnexa	0.294123	1	0
147	Malignant neoplasm of nasopharynx	185	Malignant neoplasm of prostate	0.761388	1	0
147	Malignant neoplasm of nasopharynx	186	Malignant neoplasm of testis		1	0
147	Malignant neoplasm of nasopharynx	188	Malignant neoplasm of bladder	0.405446	1	0
147	Malignant neoplasm of nasopharynx	190	Malignant neoplasm of eye	26.4205	26.4205	3.27414
147	Malignant neoplasm of nasopharynx	191	Malignant neoplasm of brain	8.41929	8.41929	2.13053
147	Malignant neoplasm of nasopharynx	193	Malignant neoplasm of thyroid gland	2.07533	1	0
147	Malignant neoplasm of nasopharynx	194	Malignant neoplasm of other endocrine glands and related structures	15.9057	15.9057	2.76668
147	Malignant neoplasm of nasopharynx	200	Lymphosarcoma and reticulosarcoma and other specified malignant tumors of lymphatic tissue	3.03199	3.03199	1.10922
147	Malignant neoplasm of nasopharynx	201	Hodgkin's disease	5.46334	5.46334	1.69806
147	Malignant neoplasm of nasopharynx	202	Other malignant neoplasms of lymphoid and histiocytic tissue	3.43078	3.43078	1.23279
147	Malignant neoplasm of nasopharynx	203	Multiple myeloma and immunoproliferative neoplasms	0.311572	1	0
147	Malignant neoplasm of nasopharynx	204	Lymphoid leukemia	0.614911	1	0
147	Malignant neoplasm of nasopharynx	207	Other specified leukemia		1	0
147	Malignant neoplasm of nasopharynx	208	Leukemia of unspecified cell type	1.16824	1	0
147	Malignant neoplasm of nasopharynx	211	Benign neoplasm of other parts of digestive system	0.567935	1	0
147	Malignant neoplasm of nasopharynx	216	Benign neoplasm of skin	1.94745	1	0
147	Malignant neoplasm of nasopharynx	231	Carcinoma in situ of respiratory system	31.1808	31.1808	3.4398
147	Malignant neoplasm of nasopharynx	237	Neoplasm of uncertain behavior of endocrine glands and nervous system	5.88285	5.88285	1.77204
147	Malignant neoplasm of nasopharynx	238	Neoplasm of uncertain behavior of other and unspecified sites and tissues	1.59805	1	0
147	Malignant neoplasm of nasopharynx	239	Neoplasms of unspecified nature	5.60889	5.60889	1.72435
147	Malignant neoplasm of nasopharynx	244	Acquired hypothyroidism	0.938143	1	0
147	Malignant neoplasm of nasopharynx	250	Diabetes mellitus	0.707884	0.707884	-0.345475
147	Malignant neoplasm of nasopharynx	251	Other disorders of pancreatic internal secretion	0.994979	1	0
147	Malignant neoplasm of nasopharynx	255	Disorders of adrenal glands	1.04399	1	0
147	Malignant neoplasm of nasopharynx	259	Other endocrine disorders	2.50281	1	0
147	Malignant neoplasm of nasopharynx	260	Kwashiorkor	4.08644	4.08644	1.40767
147	Malignant neoplasm of nasopharynx	268	Vitamin D deficiency		1	0
147	Malignant neoplasm of nasopharynx	270	Disorders of amino-acid transport and metabolism	4.37962	1	0
147	Malignant neoplasm of nasopharynx	271	Disorders of carbohydrate transport and metabolism	0.245741	1	0
147	Malignant neoplasm of nasopharynx	272	Disorders of lipoid metabolism	0.555441	0.555441	-0.587993
147	Malignant neoplasm of nasopharynx	275	Disorders of mineral metabolism	3.2579	3.2579	1.18108
147	Malignant neoplasm of nasopharynx	276	Disorders of fluid, electrolyte, and acid-base balance	1.80913	1.80913	0.592844
147	Malignant neoplasm of nasopharynx	277	Other and unspecified disorders of metabolism	0.812815	1	0
147	Malignant neoplasm of nasopharynx	279	Disorders involving the immune mechanism	1.09977	1	0
147	Malignant neoplasm of nasopharynx	281	Other deficiency anemias	1.24587	1	0
147	Malignant neoplasm of nasopharynx	282	Hereditary hemolytic anemias	1.44927	1	0
147	Malignant neoplasm of nasopharynx	283	Acquired hemolytic anemias		1	0
147	Malignant neoplasm of nasopharynx	284	Aplastic anemia and other bone marrow failure syndromes	6.4343	6.4343	1.86164
147	Malignant neoplasm of nasopharynx	285	Other and unspecified anemias	1.5519	1.5519	0.439479
147	Malignant neoplasm of nasopharynx	286	Coagulation defects	1.24936	1	0
147	Malignant neoplasm of nasopharynx	287	Purpura and other hemorrhagic conditions	2.2043	2.2043	0.790408
147	Malignant neoplasm of nasopharynx	288	Diseases of white blood cells	5.65041	5.65041	1.73173
147	Malignant neoplasm of nasopharynx	289	Other diseases of blood and blood-forming organs	1.28809	1	0
147	Malignant neoplasm of nasopharynx	330	Cerebral degenerations usually manifest in childhood		1	0
147	Malignant neoplasm of nasopharynx	331	Other cerebral degenerations	0.537448	0.537448	-0.620924
147	Malignant neoplasm of nasopharynx	332	Parkinson's disease	0.625117	1	0
147	Malignant neoplasm of nasopharynx	333	Other extrapyramidal disease and abnormal movement disorders	0.730427	1	0
147	Malignant neoplasm of nasopharynx	334	Spinocerebellar disease	1.76398	1	0
147	Malignant neoplasm of nasopharynx	335	Anterior horn cell disease		1	0
147	Malignant neoplasm of nasopharynx	355	Mononeuritis of lower limb	1.56713	1	0
147	Malignant neoplasm of nasopharynx	356	Hereditary and idiopathic peripheral neuropathy	0.881134	1	0
147	Malignant neoplasm of nasopharynx	362	Other retinal disorders	1.29821	1	0
147	Malignant neoplasm of nasopharynx	365	Glaucoma	0.840714	1	0
147	Malignant neoplasm of nasopharynx	366	Cataract	1.1571	1	0
147	Malignant neoplasm of nasopharynx	370	Keratitis	3.4027	1	0
147	Malignant neoplasm of nasopharynx	371	Corneal opacity and other disorders of cornea	1.69577	1	0
147	Malignant neoplasm of nasopharynx	374	Other disorders of eyelids	6.4007	6.4007	1.85641
147	Malignant neoplasm of nasopharynx	377	Disorders of optic nerve and visual pathways	3.46252	1	0
147	Malignant neoplasm of nasopharynx	401	Essential hypertension	0.870296	0.870296	-0.138922
147	Malignant neoplasm of nasopharynx	425	Cardiomyopathy	0.438618	0.438618	-0.824125
147	Malignant neoplasm of nasopharynx	492	Emphysema	1.69674	1.69674	0.528707
147	Malignant neoplasm of nasopharynx	515	Postinflammatory pulmonary fibrosis	1.23749	1	0
147	Malignant neoplasm of nasopharynx	516	Other alveolar and parietoalveolar pneumonopathy	1.43584	1	0
147	Malignant neoplasm of nasopharynx	523	Gingival and periodontal diseases	7.82572	7.82572	2.05742
147	Malignant neoplasm of nasopharynx	528	Diseases of the oral soft tissues, excluding lesions specific for gingiva and tongue	50.5525	50.5525	3.92301
147	Malignant neoplasm of nasopharynx	555	Regional enteritis	1.0435	1	0
147	Malignant neoplasm of nasopharynx	569	Other disorders of intestine	0.718421	1	0
147	Malignant neoplasm of nasopharynx	587	Renal sclerosis, unspecified		1	0
147	Malignant neoplasm of nasopharynx	695	Erythematous conditions	2.40545	1	0
147	Malignant neoplasm of nasopharynx	706	Diseases of sebaceous glands	2.9124	1	0
147	Malignant neoplasm of nasopharynx	709	Other disorders of skin and subcutaneous tissue	1.26103	1	0
147	Malignant neoplasm of nasopharynx	714	Rheumatoid arthritis and other inflammatory polyarthropathies	0.556181	1	0
147	Malignant neoplasm of nasopharynx	720	Ankylosing spondylitis and other inflammatory spondylopathies	0.708636	1	0
147	Malignant neoplasm of nasopharynx	728	Disorders of muscle, ligament, and fascia	0.786392	1	0
147	Malignant neoplasm of nasopharynx	733	Other disorders of bone and cartilage	1.05954	1	0
147	Malignant neoplasm of nasopharynx	743	Congenital anomalies of eye		1	0
147	Malignant neoplasm of nasopharynx	744	Congenital anomalies of ear, face, and neck	12.9731	1	0
147	Malignant neoplasm of nasopharynx	755	Other congenital anomalies of limbs	2.2461	1	0
147	Malignant neoplasm of nasopharynx	756	Other congenital musculoskeletal anomalies		1	0
147	Malignant neoplasm of nasopharynx	757	Congenital anomalies of the integument		1	0
147	Malignant neoplasm of nasopharynx	758	Chromosomal anomalies		1	0
147	Malignant neoplasm of nasopharynx	759	Other and unspecified congenital anomalies		1	0
147	Malignant neoplasm of nasopharynx	781	Symptoms involving nervous and musculoskeletal systems	1.35214	1	0
147	Malignant neoplasm of nasopharynx	995	Certain adverse effects not elsewhere classified	0.390007	1	0
151	Malignant neoplasm of stomach	094	Neurosyphilis	1.19893	1	0
151	Malignant neoplasm of stomach	153	Malignant neoplasm of colon	1.50846	1.50846	0.411089
151	Malignant neoplasm of stomach	155	Malignant neoplasm of liver and intrahepatic bile ducts	4.50263	4.50263	1.50466
151	Malignant neoplasm of stomach	157	Malignant neoplasm of pancreas	4.60365	4.60365	1.52685
151	Malignant neoplasm of stomach	161	Malignant neoplasm of larynx	1.48121	1.48121	0.392858
151	Malignant neoplasm of stomach	162	Malignant neoplasm of trachea, bronchus, and lung	0.854467	0.854467	-0.157277
151	Malignant neoplasm of stomach	164	Malignant neoplasm of thymus, heart, and mediastinum	1.75377	1	0
151	Malignant neoplasm of stomach	170	Malignant neoplasm of bone and articular cartilage	1.58094	1	0
151	Malignant neoplasm of stomach	171	Malignant neoplasm of connective and other soft tissue	6.20635	6.20635	1.82557
151	Malignant neoplasm of stomach	172	Malignant melanoma of skin	0.839384	1	0
151	Malignant neoplasm of stomach	173	Other malignant neoplasm of skin	1.17458	1	0
151	Malignant neoplasm of stomach	174	Malignant neoplasm of female breast	0.408807	0.408807	-0.894512
151	Malignant neoplasm of stomach	176	Kaposi's sarcoma	3.88323	3.88323	1.35667
151	Malignant neoplasm of stomach	183	Malignant neoplasm of ovary and other uterine adnexa	1.11592	1	0
151	Malignant neoplasm of stomach	185	Malignant neoplasm of prostate	0.794931	0.794931	-0.2295
151	Malignant neoplasm of stomach	186	Malignant neoplasm of testis	1.05276	1	0
151	Malignant neoplasm of stomach	188	Malignant neoplasm of bladder	0.733321	0.733321	-0.310172
151	Malignant neoplasm of stomach	190	Malignant neoplasm of eye	0.152574	1	0
151	Malignant neoplasm of stomach	191	Malignant neoplasm of brain	0.765764	1	0
151	Malignant neoplasm of stomach	193	Malignant neoplasm of thyroid gland	0.48538	1	0
151	Malignant neoplasm of stomach	194	Malignant neoplasm of other endocrine glands and related structures	2.75559	2.75559	1.01363
151	Malignant neoplasm of stomach	200	Lymphosarcoma and reticulosarcoma and other specified malignant tumors of lymphatic tissue	3.54561	3.54561	1.26571
151	Malignant neoplasm of stomach	201	Hodgkin's disease	1.79834	1	0
151	Malignant neoplasm of stomach	202	Other malignant neoplasms of lymphoid and histiocytic tissue	3.38788	3.38788	1.2202
151	Malignant neoplasm of stomach	203	Multiple myeloma and immunoproliferative neoplasms	0.777287	1	0
151	Malignant neoplasm of stomach	204	Lymphoid leukemia	0.862894	1	0
151	Malignant neoplasm of stomach	207	Other specified leukemia	1.59729	1	0
151	Malignant neoplasm of stomach	208	Leukemia of unspecified cell type	1.0322	1	0
151	Malignant neoplasm of stomach	211	Benign neoplasm of other parts of digestive system	2.63128	2.63128	0.967469
151	Malignant neoplasm of stomach	216	Benign neoplasm of skin	1.2652	1	0
151	Malignant neoplasm of stomach	217	Benign neoplasm of breast	0.383646	1	0
151	Malignant neoplasm of stomach	231	Carcinoma in situ of respiratory system	1.62057	1	0
151	Malignant neoplasm of stomach	237	Neoplasm of uncertain behavior of endocrine glands and nervous system	0.856106	1	0
151	Malignant neoplasm of stomach	238	Neoplasm of uncertain behavior of other and unspecified sites and tissues	1.0059	1	0
151	Malignant neoplasm of stomach	239	Neoplasms of unspecified nature	3.32071	3.32071	1.20018
151	Malignant neoplasm of stomach	244	Acquired hypothyroidism	0.735331	0.735331	-0.307435
151	Malignant neoplasm of stomach	250	Diabetes mellitus	0.88958	0.88958	-0.117005
151	Malignant neoplasm of stomach	251	Other disorders of pancreatic internal secretion	1.26695	1.26695	0.236616
151	Malignant neoplasm of stomach	255	Disorders of adrenal glands	1.05806	1	0
151	Malignant neoplasm of stomach	259	Other endocrine disorders	1.9512	1.9512	0.668443
151	Malignant neoplasm of stomach	260	Kwashiorkor	6.03177	6.03177	1.79704
151	Malignant neoplasm of stomach	268	Vitamin D deficiency	1.21642	1	0
151	Malignant neoplasm of stomach	270	Disorders of amino-acid transport and metabolism	0.455247	1	0
151	Malignant neoplasm of stomach	271	Disorders of carbohydrate transport and metabolism	0.855723	1	0
151	Malignant neoplasm of stomach	272	Disorders of lipoid metabolism	0.463203	0.463203	-0.76959
151	Malignant neoplasm of stomach	275	Disorders of mineral metabolism	1.73087	1.73087	0.548623
151	Malignant neoplasm of stomach	276	Disorders of fluid, electrolyte, and acid-base balance	1.68683	1.68683	0.522848
151	Malignant neoplasm of stomach	277	Other and unspecified disorders of metabolism	1.18285	1	0
151	Malignant neoplasm of stomach	279	Disorders involving the immune mechanism	1.71476	1.71476	0.539274
151	Malignant neoplasm of stomach	281	Other deficiency anemias	2.1638	2.1638	0.771864
151	Malignant neoplasm of stomach	282	Hereditary hemolytic anemias	1.88309	1.88309	0.632912
151	Malignant neoplasm of stomach	283	Acquired hemolytic anemias	1.56937	1.56937	0.450676
151	Malignant neoplasm of stomach	284	Aplastic anemia and other bone marrow failure syndromes	4.87287	4.87287	1.58368
151	Malignant neoplasm of stomach	285	Other and unspecified anemias	2.33182	2.33182	0.846648
151	Malignant neoplasm of stomach	286	Coagulation defects	1.52999	1.52999	0.425263
151	Malignant neoplasm of stomach	287	Purpura and other hemorrhagic conditions	1.97052	1.97052	0.678295
151	Malignant neoplasm of stomach	288	Diseases of white blood cells	3.66706	3.66706	1.29939
151	Malignant neoplasm of stomach	289	Other diseases of blood and blood-forming organs	1.96822	1.96822	0.677129
151	Malignant neoplasm of stomach	330	Cerebral degenerations usually manifest in childhood	0.804191	1	0
151	Malignant neoplasm of stomach	331	Other cerebral degenerations	0.561453	0.561453	-0.577227
151	Malignant neoplasm of stomach	332	Parkinson's disease	0.680248	0.680248	-0.385298
151	Malignant neoplasm of stomach	333	Other extrapyramidal disease and abnormal movement disorders	0.68333	0.68333	-0.380777
151	Malignant neoplasm of stomach	334	Spinocerebellar disease	0.687602	1	0
151	Malignant neoplasm of stomach	335	Anterior horn cell disease	0.554799	1	0
151	Malignant neoplasm of stomach	355	Mononeuritis of lower limb	0.963814	1	0
151	Malignant neoplasm of stomach	356	Hereditary and idiopathic peripheral neuropathy	1.02277	1	0
151	Malignant neoplasm of stomach	362	Other retinal disorders	0.63921	0.63921	-0.447522
151	Malignant neoplasm of stomach	365	Glaucoma	0.91759	1	0
151	Malignant neoplasm of stomach	366	Cataract	0.675401	0.675401	-0.392448
151	Malignant neoplasm of stomach	370	Keratitis	0.618975	1	0
151	Malignant neoplasm of stomach	371	Corneal opacity and other disorders of cornea	0.683044	1	0
151	Malignant neoplasm of stomach	374	Other disorders of eyelids	0.807904	1	0
151	Malignant neoplasm of stomach	377	Disorders of optic nerve and visual pathways	0.659849	1	0
151	Malignant neoplasm of stomach	401	Essential hypertension	0.869575	0.869575	-0.139751
151	Malignant neoplasm of stomach	425	Cardiomyopathy	0.788491	0.788491	-0.237634
151	Malignant neoplasm of stomach	492	Emphysema	1.33286	1.33286	0.287324
151	Malignant neoplasm of stomach	515	Postinflammatory pulmonary fibrosis	1.00763	1	0
151	Malignant neoplasm of stomach	516	Other alveolar and parietoalveolar pneumonopathy	0.820883	1	0
151	Malignant neoplasm of stomach	523	Gingival and periodontal diseases	1.06767	1	0
151	Malignant neoplasm of stomach	528	Diseases of the oral soft tissues, excluding lesions specific for gingiva and tongue	5.1733	5.1733	1.64351
151	Malignant neoplasm of stomach	555	Regional enteritis	0.867747	1	0
151	Malignant neoplasm of stomach	569	Other disorders of intestine	1.56076	1.56076	0.445175
151	Malignant neoplasm of stomach	587	Renal sclerosis, unspecified	0.652047	1	0
151	Malignant neoplasm of stomach	695	Erythematous conditions	0.732256	1	0
151	Malignant neoplasm of stomach	706	Diseases of sebaceous glands	0.999024	1	0
151	Malignant neoplasm of stomach	709	Other disorders of skin and subcutaneous tissue	1.13603	1	0
151	Malignant neoplasm of stomach	714	Rheumatoid arthritis and other inflammatory polyarthropathies	0.464915	0.464915	-0.765901
151	Malignant neoplasm of stomach	720	Ankylosing spondylitis and other inflammatory spondylopathies	0.736605	1	0
151	Malignant neoplasm of stomach	728	Disorders of muscle, ligament, and fascia	0.916689	1	0
151	Malignant neoplasm of stomach	733	Other disorders of bone and cartilage	0.648404	0.648404	-0.433241
151	Malignant neoplasm of stomach	743	Congenital anomalies of eye		1	0
151	Malignant neoplasm of stomach	744	Congenital anomalies of ear, face, and neck	1.34851	1	0
151	Malignant neoplasm of stomach	755	Other congenital anomalies of limbs	0.700425	1	0
151	Malignant neoplasm of stomach	756	Other congenital musculoskeletal anomalies	0.505066	0.505066	-0.683066
151	Malignant neoplasm of stomach	757	Congenital anomalies of the integument	1.06339	1	0
151	Malignant neoplasm of stomach	758	Chromosomal anomalies		1	0
151	Malignant neoplasm of stomach	759	Other and unspecified congenital anomalies	2.94291	2.94291	1.0794
151	Malignant neoplasm of stomach	781	Symptoms involving nervous and musculoskeletal systems	0.730866	0.730866	-0.313526
151	Malignant neoplasm of stomach	995	Certain adverse effects not elsewhere classified	0.79053	0.79053	-0.235051
155	Malignant neoplasm of liver and intrahepatic bile ducts	094	Neurosyphilis	1.69098	1	0
155	Malignant neoplasm of liver and intrahepatic bile ducts	153	Malignant neoplasm of colon	2.91297	2.91297	1.06917
155	Malignant neoplasm of liver and intrahepatic bile ducts	157	Malignant neoplasm of pancreas	20.6143	20.6143	3.02598
155	Malignant neoplasm of liver and intrahepatic bile ducts	161	Malignant neoplasm of larynx	1.23448	1	0
155	Malignant neoplasm of liver and intrahepatic bile ducts	162	Malignant neoplasm of trachea, bronchus, and lung	2.44314	2.44314	0.893284
155	Malignant neoplasm of liver and intrahepatic bile ducts	170	Malignant neoplasm of bone and articular cartilage	11.6444	11.6444	2.45482
155	Malignant neoplasm of liver and intrahepatic bile ducts	171	Malignant neoplasm of connective and other soft tissue	5.93458	5.93458	1.7808
155	Malignant neoplasm of liver and intrahepatic bile ducts	172	Malignant melanoma of skin	1.77582	1	0
155	Malignant neoplasm of liver and intrahepatic bile ducts	173	Other malignant neoplasm of skin	1.76303	1.76303	0.567032
155	Malignant neoplasm of liver and intrahepatic bile ducts	176	Kaposi's sarcoma	3.12969	1	0
155	Malignant neoplasm of liver and intrahepatic bile ducts	183	Malignant neoplasm of ovary and other uterine adnexa	1.81107	1.81107	0.593919
155	Malignant neoplasm of liver and intrahepatic bile ducts	185	Malignant neoplasm of prostate	0.781379	0.781379	-0.246695
155	Malignant neoplasm of liver and intrahepatic bile ducts	186	Malignant neoplasm of testis	2.96965	1	0
155	Malignant neoplasm of liver and intrahepatic bile ducts	188	Malignant neoplasm of bladder	1.27205	1	0
155	Malignant neoplasm of liver and intrahepatic bile ducts	190	Malignant neoplasm of eye	1.72154	1	0
155	Malignant neoplasm of liver and intrahepatic bile ducts	191	Malignant neoplasm of brain	3.39442	3.39442	1.22213
155	Malignant neoplasm of liver and intrahepatic bile ducts	193	Malignant neoplasm of thyroid gland	1.21704	1	0
155	Malignant neoplasm of liver and intrahepatic bile ducts	194	Malignant neoplasm of other endocrine glands and related structures	16.3234	16.3234	2.7926
155	Malignant neoplasm of liver and intrahepatic bile ducts	200	Lymphosarcoma and reticulosarcoma and other specified malignant tumors of lymphatic tissue	1.61136	1	0
155	Malignant neoplasm of liver and intrahepatic bile ducts	202	Other malignant neoplasms of lymphoid and histiocytic tissue	1.6766	1.6766	0.516768
155	Malignant neoplasm of liver and intrahepatic bile ducts	203	Multiple myeloma and immunoproliferative neoplasms	0.913579	1	0
155	Malignant neoplasm of liver and intrahepatic bile ducts	204	Lymphoid leukemia	0.781307	1	0
155	Malignant neoplasm of liver and intrahepatic bile ducts	207	Other specified leukemia		1	0
155	Malignant neoplasm of liver and intrahepatic bile ducts	208	Leukemia of unspecified cell type	0.342547	1	0
155	Malignant neoplasm of liver and intrahepatic bile ducts	211	Benign neoplasm of other parts of digestive system	2.72391	2.72391	1.00207
155	Malignant neoplasm of liver and intrahepatic bile ducts	216	Benign neoplasm of skin	0.428268	1	0
155	Malignant neoplasm of liver and intrahepatic bile ducts	237	Neoplasm of uncertain behavior of endocrine glands and nervous system	1.55245	1	0
155	Malignant neoplasm of liver and intrahepatic bile ducts	238	Neoplasm of uncertain behavior of other and unspecified sites and tissues	1.45779	1.45779	0.37692
155	Malignant neoplasm of liver and intrahepatic bile ducts	239	Neoplasms of unspecified nature	6.68571	6.68571	1.89997
155	Malignant neoplasm of liver and intrahepatic bile ducts	244	Acquired hypothyroidism	0.957198	1	0
155	Malignant neoplasm of liver and intrahepatic bile ducts	250	Diabetes mellitus	1.38935	1.38935	0.328836
155	Malignant neoplasm of liver and intrahepatic bile ducts	251	Other disorders of pancreatic internal secretion	2.38604	2.38604	0.869637
155	Malignant neoplasm of liver and intrahepatic bile ducts	255	Disorders of adrenal glands	1.53057	1.53057	0.425639
155	Malignant neoplasm of liver and intrahepatic bile ducts	259	Other endocrine disorders	16.512	16.512	2.80408
155	Malignant neoplasm of liver and intrahepatic bile ducts	260	Kwashiorkor	4.31355	4.31355	1.46176
155	Malignant neoplasm of liver and intrahepatic bile ducts	268	Vitamin D deficiency	0.686264	1	0
155	Malignant neoplasm of liver and intrahepatic bile ducts	270	Disorders of amino-acid transport and metabolism	12.1996	12.1996	2.50141
155	Malignant neoplasm of liver and intrahepatic bile ducts	271	Disorders of carbohydrate transport and metabolism	0.756578	1	0
155	Malignant neoplasm of liver and intrahepatic bile ducts	272	Disorders of lipoid metabolism	0.48304	0.48304	-0.727656
155	Malignant neoplasm of liver and intrahepatic bile ducts	275	Disorders of mineral metabolism	3.59994	3.59994	1.28092
155	Malignant neoplasm of liver and intrahepatic bile ducts	276	Disorders of fluid, electrolyte, and acid-base balance	1.93924	1.93924	0.662295
155	Malignant neoplasm of liver and intrahepatic bile ducts	277	Other and unspecified disorders of metabolism	2.62163	2.62163	0.963797
155	Malignant neoplasm of liver and intrahepatic bile ducts	279	Disorders involving the immune mechanism	0.967408	1	0
155	Malignant neoplasm of liver and intrahepatic bile ducts	281	Other deficiency anemias	1.33946	1.33946	0.292268
155	Malignant neoplasm of liver and intrahepatic bile ducts	282	Hereditary hemolytic anemias	1.41649	1	0
155	Malignant neoplasm of liver and intrahepatic bile ducts	283	Acquired hemolytic anemias	2.03779	2.03779	0.711866
155	Malignant neoplasm of liver and intrahepatic bile ducts	284	Aplastic anemia and other bone marrow failure syndromes	5.52515	5.52515	1.70931
155	Malignant neoplasm of liver and intrahepatic bile ducts	285	Other and unspecified anemias	1.83934	1.83934	0.609405
155	Malignant neoplasm of liver and intrahepatic bile ducts	286	Coagulation defects	5.36904	5.36904	1.68065
155	Malignant neoplasm of liver and intrahepatic bile ducts	287	Purpura and other hemorrhagic conditions	4.62937	4.62937	1.53242
155	Malignant neoplasm of liver and intrahepatic bile ducts	288	Diseases of white blood cells	3.42884	3.42884	1.23222
155	Malignant neoplasm of liver and intrahepatic bile ducts	289	Other diseases of blood and blood-forming organs	2.87042	2.87042	1.05446
155	Malignant neoplasm of liver and intrahepatic bile ducts	330	Cerebral degenerations usually manifest in childhood		1	0
155	Malignant neoplasm of liver and intrahepatic bile ducts	331	Other cerebral degenerations	0.590955	0.590955	-0.526015
155	Malignant neoplasm of liver and intrahepatic bile ducts	332	Parkinson's disease	0.704536	0.704536	-0.350215
155	Malignant neoplasm of liver and intrahepatic bile ducts	333	Other extrapyramidal disease and abnormal movement disorders	0.514014	0.514014	-0.665504
155	Malignant neoplasm of liver and intrahepatic bile ducts	334	Spinocerebellar disease	1.29307	1	0
155	Malignant neoplasm of liver and intrahepatic bile ducts	335	Anterior horn cell disease	0.601919	1	0
155	Malignant neoplasm of liver and intrahepatic bile ducts	355	Mononeuritis of lower limb	1.11047	1	0
155	Malignant neoplasm of liver and intrahepatic bile ducts	356	Hereditary and idiopathic peripheral neuropathy	1.50711	1.50711	0.410196
155	Malignant neoplasm of liver and intrahepatic bile ducts	362	Other retinal disorders	0.831429	1	0
155	Malignant neoplasm of liver and intrahepatic bile ducts	365	Glaucoma	0.974837	1	0
155	Malignant neoplasm of liver and intrahepatic bile ducts	366	Cataract	0.913446	1	0
155	Malignant neoplasm of liver and intrahepatic bile ducts	370	Keratitis	0.748294	1	0
155	Malignant neoplasm of liver and intrahepatic bile ducts	371	Corneal opacity and other disorders of cornea	0.683685	1	0
155	Malignant neoplasm of liver and intrahepatic bile ducts	374	Other disorders of eyelids	0.938393	1	0
155	Malignant neoplasm of liver and intrahepatic bile ducts	377	Disorders of optic nerve and visual pathways	0.507632	1	0
155	Malignant neoplasm of liver and intrahepatic bile ducts	401	Essential hypertension	0.931086	0.931086	-0.0714039
155	Malignant neoplasm of liver and intrahepatic bile ducts	425	Cardiomyopathy	0.892704	1	0
155	Malignant neoplasm of liver and intrahepatic bile ducts	492	Emphysema	1.26865	1.26865	0.237954
155	Malignant neoplasm of liver and intrahepatic bile ducts	515	Postinflammatory pulmonary fibrosis	1.08856	1	0
155	Malignant neoplasm of liver and intrahepatic bile ducts	523	Gingival and periodontal diseases	1.57755	1	0
155	Malignant neoplasm of liver and intrahepatic bile ducts	555	Regional enteritis	1.47886	1	0
155	Malignant neoplasm of liver and intrahepatic bile ducts	569	Other disorders of intestine	1.60096	1.60096	0.470603
155	Malignant neoplasm of liver and intrahepatic bile ducts	587	Renal sclerosis, unspecified		1	0
155	Malignant neoplasm of liver and intrahepatic bile ducts	695	Erythematous conditions	1.30987	1	0
155	Malignant neoplasm of liver and intrahepatic bile ducts	706	Diseases of sebaceous glands	1.19555	1	0
155	Malignant neoplasm of liver and intrahepatic bile ducts	709	Other disorders of skin and subcutaneous tissue	1.29414	1	0
155	Malignant neoplasm of liver and intrahepatic bile ducts	714	Rheumatoid arthritis and other inflammatory polyarthropathies	0.74066	0.74066	-0.300214
155	Malignant neoplasm of liver and intrahepatic bile ducts	720	Ankylosing spondylitis and other inflammatory spondylopathies	0.831134	1	0
155	Malignant neoplasm of liver and intrahepatic bile ducts	728	Disorders of muscle, ligament, and fascia	1.03762	1	0
155	Malignant neoplasm of liver and intrahepatic bile ducts	733	Other disorders of bone and cartilage	1.04141	1	0
155	Malignant neoplasm of liver and intrahepatic bile ducts	743	Congenital anomalies of eye		1	0
155	Malignant neoplasm of liver and intrahepatic bile ducts	744	Congenital anomalies of ear, face, and neck		1	0
155	Malignant neoplasm of liver and intrahepatic bile ducts	755	Other congenital anomalies of limbs	0.987887	1	0
155	Malignant neoplasm of liver and intrahepatic bile ducts	756	Other congenital musculoskeletal anomalies	0.518073	1	0
155	Malignant neoplasm of liver and intrahepatic bile ducts	757	Congenital anomalies of the integument	0.599929	1	0
155	Malignant neoplasm of liver and intrahepatic bile ducts	758	Chromosomal anomalies		1	0
155	Malignant neoplasm of liver and intrahepatic bile ducts	759	Other and unspecified congenital anomalies	2.49043	2.49043	0.912456
155	Malignant neoplasm of liver and intrahepatic bile ducts	781	Symptoms involving nervous and musculoskeletal systems	0.896022	1	0
155	Malignant neoplasm of liver and intrahepatic bile ducts	995	Certain adverse effects not elsewhere classified	1.05208	1	0
162	Malignant neoplasm of trachea, bronchus, and lung	094	Neurosyphilis	0.75122	1	0
162	Malignant neoplasm of trachea, bronchus, and lung	153	Malignant neoplasm of colon	0.762531	0.762531	-0.271112
162	Malignant neoplasm of trachea, bronchus, and lung	157	Malignant neoplasm of pancreas	0.977021	1	0
162	Malignant neoplasm of trachea, bronchus, and lung	161	Malignant neoplasm of larynx	4.71053	4.71053	1.5498
162	Malignant neoplasm of trachea, bronchus, and lung	164	Malignant neoplasm of thymus, heart, and mediastinum	23.2934	23.2934	3.14817
162	Malignant neoplasm of trachea, bronchus, and lung	170	Malignant neoplasm of bone and articular cartilage	4.24989	4.24989	1.44689
162	Malignant neoplasm of trachea, bronchus, and lung	171	Malignant neoplasm of connective and other soft tissue	2.52269	2.52269	0.925326
162	Malignant neoplasm of trachea, bronchus, and lung	172	Malignant melanoma of skin	1.21729	1.21729	0.196629
162	Malignant neoplasm of trachea, bronchus, and lung	173	Other malignant neoplasm of skin	1.38589	1.38589	0.326343
162	Malignant neoplasm of trachea, bronchus, and lung	174	Malignant neoplasm of female breast	0.535848	0.535848	-0.623904
162	Malignant neoplasm of trachea, bronchus, and lung	176	Kaposi's sarcoma	2.35465	2.35465	0.856394
162	Malignant neoplasm of trachea, bronchus, and lung	183	Malignant neoplasm of ovary and other uterine adnexa	0.53638	0.53638	-0.622912
162	Malignant neoplasm of trachea, bronchus, and lung	185	Malignant neoplasm of prostate	0.846248	0.846248	-0.166943
162	Malignant neoplasm of trachea, bronchus, and lung	186	Malignant neoplasm of testis	2.0853	2.0853	0.73491
162	Malignant neoplasm of trachea, bronchus, and lung	188	Malignant neoplasm of bladder	1.22716	1.22716	0.204701
162	Malignant neoplasm of trachea, bronchus, and lung	190	Malignant neoplasm of eye	1.03617	1	0
162	Malignant neoplasm of trachea, bronchus, and lung	191	Malignant neoplasm of brain	4.26153	4.26153	1.44963
162	Malignant neoplasm of trachea, bronchus, and lung	193	Malignant neoplasm of thyroid gland	1.09878	1	0
162	Malignant neoplasm of trachea, bronchus, and lung	194	Malignant neoplasm of other endocrine glands and related structures	4.87343	4.87343	1.5838
162	Malignant neoplasm of trachea, bronchus, and lung	200	Lymphosarcoma and reticulosarcoma and other specified malignant tumors of lymphatic tissue	1.04511	1	0
162	Malignant neoplasm of trachea, bronchus, and lung	201	Hodgkin's disease	1.4061	1.4061	0.340823
162	Malignant neoplasm of trachea, bronchus, and lung	202	Other malignant neoplasms of lymphoid and histiocytic tissue	1.32388	1.32388	0.280564
162	Malignant neoplasm of trachea, bronchus, and lung	203	Multiple myeloma and immunoproliferative neoplasms	0.72858	0.72858	-0.316658
162	Malignant neoplasm of trachea, bronchus, and lung	204	Lymphoid leukemia	1.18469	1.18469	0.169482
162	Malignant neoplasm of trachea, bronchus, and lung	207	Other specified leukemia	0.338989	1	0
162	Malignant neoplasm of trachea, bronchus, and lung	208	Leukemia of unspecified cell type	1.09101	1	0
162	Malignant neoplasm of trachea, bronchus, and lung	211	Benign neoplasm of other parts of digestive system	0.890444	0.890444	-0.116035
162	Malignant neoplasm of trachea, bronchus, and lung	216	Benign neoplasm of skin	1.02392	1	0
162	Malignant neoplasm of trachea, bronchus, and lung	217	Benign neoplasm of breast	1.05303	1	0
162	Malignant neoplasm of trachea, bronchus, and lung	231	Carcinoma in situ of respiratory system	27.6291	27.6291	3.31887
162	Malignant neoplasm of trachea, bronchus, and lung	237	Neoplasm of uncertain behavior of endocrine glands and nervous system	1.88611	1.88611	0.634514
162	Malignant neoplasm of trachea, bronchus, and lung	238	Neoplasm of uncertain behavior of other and unspecified sites and tissues	1.13465	1.13465	0.12632
162	Malignant neoplasm of trachea, bronchus, and lung	239	Neoplasms of unspecified nature	5.1789	5.1789	1.64459
162	Malignant neoplasm of trachea, bronchus, and lung	244	Acquired hypothyroidism	0.799305	0.799305	-0.224013
162	Malignant neoplasm of trachea, bronchus, and lung	250	Diabetes mellitus	0.789686	0.789686	-0.23612
162	Malignant neoplasm of trachea, bronchus, and lung	251	Other disorders of pancreatic internal secretion	0.986164	1	0
162	Malignant neoplasm of trachea, bronchus, and lung	255	Disorders of adrenal glands	2.22055	2.22055	0.797754
162	Malignant neoplasm of trachea, bronchus, and lung	259	Other endocrine disorders	2.09809	2.09809	0.74103
162	Malignant neoplasm of trachea, bronchus, and lung	260	Kwashiorkor	2.09745	2.09745	0.740723
162	Malignant neoplasm of trachea, bronchus, and lung	268	Vitamin D deficiency	0.585159	1	0
162	Malignant neoplasm of trachea, bronchus, and lung	270	Disorders of amino-acid transport and metabolism	1.15939	1	0
162	Malignant neoplasm of trachea, bronchus, and lung	271	Disorders of carbohydrate transport and metabolism	0.94147	1	0
162	Malignant neoplasm of trachea, bronchus, and lung	272	Disorders of lipoid metabolism	0.624822	0.624822	-0.470288
162	Malignant neoplasm of trachea, bronchus, and lung	275	Disorders of mineral metabolism	2.71688	2.71688	0.999484
162	Malignant neoplasm of trachea, bronchus, and lung	276	Disorders of fluid, electrolyte, and acid-base balance	1.45201	1.45201	0.372948
162	Malignant neoplasm of trachea, bronchus, and lung	277	Other and unspecified disorders of metabolism	1.06988	1	0
162	Malignant neoplasm of trachea, bronchus, and lung	279	Disorders involving the immune mechanism	1.47185	1.47185	0.386522
162	Malignant neoplasm of trachea, bronchus, and lung	281	Other deficiency anemias	0.930267	0.930267	-0.0722832
162	Malignant neoplasm of trachea, bronchus, and lung	282	Hereditary hemolytic anemias	0.987562	1	0
162	Malignant neoplasm of trachea, bronchus, and lung	283	Acquired hemolytic anemias	1.08554	1	0
162	Malignant neoplasm of trachea, bronchus, and lung	284	Aplastic anemia and other bone marrow failure syndromes	5.17454	5.17454	1.64375
162	Malignant neoplasm of trachea, bronchus, and lung	285	Other and unspecified anemias	1.29832	1.29832	0.26107
162	Malignant neoplasm of trachea, bronchus, and lung	286	Coagulation defects	1.09671	1.09671	0.0923141
162	Malignant neoplasm of trachea, bronchus, and lung	287	Purpura and other hemorrhagic conditions	2.04884	2.04884	0.717275
162	Malignant neoplasm of trachea, bronchus, and lung	288	Diseases of white blood cells	4.15284	4.15284	1.42379
162	Malignant neoplasm of trachea, bronchus, and lung	289	Other diseases of blood and blood-forming organs	1.81292	1.81292	0.594938
162	Malignant neoplasm of trachea, bronchus, and lung	330	Cerebral degenerations usually manifest in childhood	0.910248	1	0
162	Malignant neoplasm of trachea, bronchus, and lung	331	Other cerebral degenerations	0.584515	0.584515	-0.536972
162	Malignant neoplasm of trachea, bronchus, and lung	332	Parkinson's disease	0.467434	0.467434	-0.760497
162	Malignant neoplasm of trachea, bronchus, and lung	333	Other extrapyramidal disease and abnormal movement disorders	0.710068	0.710068	-0.342395
162	Malignant neoplasm of trachea, bronchus, and lung	334	Spinocerebellar disease	1.53711	1.53711	0.429902
162	Malignant neoplasm of trachea, bronchus, and lung	335	Anterior horn cell disease	0.621927	0.621927	-0.474932
162	Malignant neoplasm of trachea, bronchus, and lung	355	Mononeuritis of lower limb	1.10244	1	0
162	Malignant neoplasm of trachea, bronchus, and lung	356	Hereditary and idiopathic peripheral neuropathy	1.24728	1.24728	0.220966
162	Malignant neoplasm of trachea, bronchus, and lung	362	Other retinal disorders	0.614983	0.614983	-0.486161
162	Malignant neoplasm of trachea, bronchus, and lung	365	Glaucoma	0.793845	0.793845	-0.230867
162	Malignant neoplasm of trachea, bronchus, and lung	366	Cataract	0.670877	0.670877	-0.399169
162	Malignant neoplasm of trachea, bronchus, and lung	370	Keratitis	0.675583	0.675583	-0.392179
162	Malignant neoplasm of trachea, bronchus, and lung	371	Corneal opacity and other disorders of cornea	0.520612	0.520612	-0.652751
162	Malignant neoplasm of trachea, bronchus, and lung	374	Other disorders of eyelids	1.06238	1	0
162	Malignant neoplasm of trachea, bronchus, and lung	377	Disorders of optic nerve and visual pathways	0.704434	0.704434	-0.35036
162	Malignant neoplasm of trachea, bronchus, and lung	401	Essential hypertension	0.834961	0.834961	-0.18037
162	Malignant neoplasm of trachea, bronchus, and lung	425	Cardiomyopathy	0.851496	0.851496	-0.160761
162	Malignant neoplasm of trachea, bronchus, and lung	492	Emphysema	3.70439	3.70439	1.30952
162	Malignant neoplasm of trachea, bronchus, and lung	515	Postinflammatory pulmonary fibrosis	2.21464	2.21464	0.795088
162	Malignant neoplasm of trachea, bronchus, and lung	516	Other alveolar and parietoalveolar pneumonopathy	2.69064	2.69064	0.989778
162	Malignant neoplasm of trachea, bronchus, and lung	523	Gingival and periodontal diseases	0.999864	1	0
162	Malignant neoplasm of trachea, bronchus, and lung	528	Diseases of the oral soft tissues, excluding lesions specific for gingiva and tongue	2.84133	2.84133	1.04427
162	Malignant neoplasm of trachea, bronchus, and lung	555	Regional enteritis	0.795468	0.795468	-0.228825
162	Malignant neoplasm of trachea, bronchus, and lung	569	Other disorders of intestine	0.832318	0.832318	-0.183541
162	Malignant neoplasm of trachea, bronchus, and lung	587	Renal sclerosis, unspecified	0.977902	1	0
162	Malignant neoplasm of trachea, bronchus, and lung	695	Erythematous conditions	1.03603	1	0
162	Malignant neoplasm of trachea, bronchus, and lung	706	Diseases of sebaceous glands	1.37492	1.37492	0.318396
162	Malignant neoplasm of trachea, bronchus, and lung	709	Other disorders of skin and subcutaneous tissue	0.948928	1	0
162	Malignant neoplasm of trachea, bronchus, and lung	714	Rheumatoid arthritis and other inflammatory polyarthropathies	0.864663	0.864663	-0.145415
162	Malignant neoplasm of trachea, bronchus, and lung	720	Ankylosing spondylitis and other inflammatory spondylopathies	0.67221	0.67221	-0.397185
162	Malignant neoplasm of trachea, bronchus, and lung	728	Disorders of muscle, ligament, and fascia	0.88971	0.88971	-0.11686
162	Malignant neoplasm of trachea, bronchus, and lung	733	Other disorders of bone and cartilage	1.16924	1.16924	0.156353
162	Malignant neoplasm of trachea, bronchus, and lung	743	Congenital anomalies of eye	0.502206	1	0
162	Malignant neoplasm of trachea, bronchus, and lung	744	Congenital anomalies of ear, face, and neck	0.953972	1	0
162	Malignant neoplasm of trachea, bronchus, and lung	755	Other congenital anomalies of limbs	0.379882	0.379882	-0.967895
162	Malignant neoplasm of trachea, bronchus, and lung	756	Other congenital musculoskeletal anomalies	0.571674	0.571674	-0.559187
162	Malignant neoplasm of trachea, bronchus, and lung	757	Congenital anomalies of the integument	0.812453	1	0
162	Malignant neoplasm of trachea, bronchus, and lung	758	Chromosomal anomalies	0.516046	1	0
162	Malignant neoplasm of trachea, bronchus, and lung	759	Other and unspecified congenital anomalies	1.99861	1.99861	0.692453
162	Malignant neoplasm of trachea, bronchus, and lung	781	Symptoms involving nervous and musculoskeletal systems	0.907193	0.907193	-0.0973998
162	Malignant neoplasm of trachea, bronchus, and lung	995	Certain adverse effects not elsewhere classified	1.08407	1.08407	0.0807194
164	Malignant neoplasm of thymus, heart, and mediastinum	094	Neurosyphilis	1.14085	1	0
164	Malignant neoplasm of thymus, heart, and mediastinum	153	Malignant neoplasm of colon	0.937976	1	0
164	Malignant neoplasm of thymus, heart, and mediastinum	157	Malignant neoplasm of pancreas		1	0
164	Malignant neoplasm of thymus, heart, and mediastinum	161	Malignant neoplasm of larynx	2.69078	1	0
164	Malignant neoplasm of thymus, heart, and mediastinum	170	Malignant neoplasm of bone and articular cartilage	12.8706	12.8706	2.55494
164	Malignant neoplasm of thymus, heart, and mediastinum	171	Malignant neoplasm of connective and other soft tissue	21.0203	21.0203	3.04549
164	Malignant neoplasm of thymus, heart, and mediastinum	172	Malignant melanoma of skin	1.67732	1	0
164	Malignant neoplasm of thymus, heart, and mediastinum	173	Other malignant neoplasm of skin	1.57911	1	0
164	Malignant neoplasm of thymus, heart, and mediastinum	176	Kaposi's sarcoma	14.7805	14.7805	2.69331
164	Malignant neoplasm of thymus, heart, and mediastinum	183	Malignant neoplasm of ovary and other uterine adnexa	0.203645	1	0
164	Malignant neoplasm of thymus, heart, and mediastinum	185	Malignant neoplasm of prostate	0.837271	1	0
164	Malignant neoplasm of thymus, heart, and mediastinum	186	Malignant neoplasm of testis	28.0493	28.0493	3.33397
164	Malignant neoplasm of thymus, heart, and mediastinum	188	Malignant neoplasm of bladder	0.954459	1	0
164	Malignant neoplasm of thymus, heart, and mediastinum	190	Malignant neoplasm of eye	2.03256	1	0
164	Malignant neoplasm of thymus, heart, and mediastinum	191	Malignant neoplasm of brain	3.40046	3.40046	1.22391
164	Malignant neoplasm of thymus, heart, and mediastinum	193	Malignant neoplasm of thyroid gland	12.2138	12.2138	2.50257
164	Malignant neoplasm of thymus, heart, and mediastinum	194	Malignant neoplasm of other endocrine glands and related structures	7.34189	7.34189	1.9936
164	Malignant neoplasm of thymus, heart, and mediastinum	200	Lymphosarcoma and reticulosarcoma and other specified malignant tumors of lymphatic tissue	4.19858	4.19858	1.43475
164	Malignant neoplasm of thymus, heart, and mediastinum	202	Other malignant neoplasms of lymphoid and histiocytic tissue	5.4295	5.4295	1.69185
164	Malignant neoplasm of thymus, heart, and mediastinum	203	Multiple myeloma and immunoproliferative neoplasms	1.07863	1	0
164	Malignant neoplasm of thymus, heart, and mediastinum	204	Lymphoid leukemia	1.98684	1	0
164	Malignant neoplasm of thymus, heart, and mediastinum	207	Other specified leukemia	10.6394	1	0
164	Malignant neoplasm of thymus, heart, and mediastinum	208	Leukemia of unspecified cell type	4.04434	4.04434	1.39732
164	Malignant neoplasm of thymus, heart, and mediastinum	211	Benign neoplasm of other parts of digestive system	0.983068	1	0
164	Malignant neoplasm of thymus, heart, and mediastinum	216	Benign neoplasm of skin	2.02257	1	0
164	Malignant neoplasm of thymus, heart, and mediastinum	237	Neoplasm of uncertain behavior of endocrine glands and nervous system	3.25854	1	0
164	Malignant neoplasm of thymus, heart, and mediastinum	238	Neoplasm of uncertain behavior of other and unspecified sites and tissues	1.47528	1	0
164	Malignant neoplasm of thymus, heart, and mediastinum	239	Neoplasms of unspecified nature	8.27351	8.27351	2.11306
164	Malignant neoplasm of thymus, heart, and mediastinum	244	Acquired hypothyroidism	1.18499	1	0
164	Malignant neoplasm of thymus, heart, and mediastinum	250	Diabetes mellitus	0.779101	0.779101	-0.249615
164	Malignant neoplasm of thymus, heart, and mediastinum	251	Other disorders of pancreatic internal secretion	1.08256	1	0
164	Malignant neoplasm of thymus, heart, and mediastinum	255	Disorders of adrenal glands	2.52993	2.52993	0.928191
164	Malignant neoplasm of thymus, heart, and mediastinum	259	Other endocrine disorders	6.9316	6.9316	1.93609
164	Malignant neoplasm of thymus, heart, and mediastinum	260	Kwashiorkor	0.565874	1	0
164	Malignant neoplasm of thymus, heart, and mediastinum	268	Vitamin D deficiency		1	0
164	Malignant neoplasm of thymus, heart, and mediastinum	270	Disorders of amino-acid transport and metabolism	3.03236	1	0
164	Malignant neoplasm of thymus, heart, and mediastinum	271	Disorders of carbohydrate transport and metabolism	1.36117	1	0
164	Malignant neoplasm of thymus, heart, and mediastinum	272	Disorders of lipoid metabolism	0.891519	1	0
164	Malignant neoplasm of thymus, heart, and mediastinum	275	Disorders of mineral metabolism	2.63166	2.63166	0.967613
164	Malignant neoplasm of thymus, heart, and mediastinum	276	Disorders of fluid, electrolyte, and acid-base balance	1.47335	1.47335	0.387539
164	Malignant neoplasm of thymus, heart, and mediastinum	277	Other and unspecified disorders of metabolism	2.25111	1	0
164	Malignant neoplasm of thymus, heart, and mediastinum	279	Disorders involving the immune mechanism	6.09166	6.09166	1.80692
164	Malignant neoplasm of thymus, heart, and mediastinum	281	Other deficiency anemias	0.934499	1	0
164	Malignant neoplasm of thymus, heart, and mediastinum	282	Hereditary hemolytic anemias	0.668964	1	0
164	Malignant neoplasm of thymus, heart, and mediastinum	283	Acquired hemolytic anemias	2.65485	2.65485	0.976386
164	Malignant neoplasm of thymus, heart, and mediastinum	284	Aplastic anemia and other bone marrow failure syndromes	9.26353	9.26353	2.22609
164	Malignant neoplasm of thymus, heart, and mediastinum	285	Other and unspecified anemias	1.57252	1.57252	0.452679
164	Malignant neoplasm of thymus, heart, and mediastinum	286	Coagulation defects	1.45974	1	0
164	Malignant neoplasm of thymus, heart, and mediastinum	287	Purpura and other hemorrhagic conditions	2.93796	2.93796	1.07771
164	Malignant neoplasm of thymus, heart, and mediastinum	288	Diseases of white blood cells	5.68125	5.68125	1.73717
164	Malignant neoplasm of thymus, heart, and mediastinum	289	Other diseases of blood and blood-forming organs	1.51614	1	0
164	Malignant neoplasm of thymus, heart, and mediastinum	330	Cerebral degenerations usually manifest in childhood	10.7133	1	0
164	Malignant neoplasm of thymus, heart, and mediastinum	331	Other cerebral degenerations	0.446542	0.446542	-0.806222
164	Malignant neoplasm of thymus, heart, and mediastinum	332	Parkinson's disease	0.622177	1	0
164	Malignant neoplasm of thymus, heart, and mediastinum	333	Other extrapyramidal disease and abnormal movement disorders	0.505733	1	0
164	Malignant neoplasm of thymus, heart, and mediastinum	334	Spinocerebellar disease	1.83202	1	0
164	Malignant neoplasm of thymus, heart, and mediastinum	335	Anterior horn cell disease	1.13707	1	0
164	Malignant neoplasm of thymus, heart, and mediastinum	355	Mononeuritis of lower limb	1.80842	1	0
164	Malignant neoplasm of thymus, heart, and mediastinum	356	Hereditary and idiopathic peripheral neuropathy	1.62688	1	0
164	Malignant neoplasm of thymus, heart, and mediastinum	362	Other retinal disorders	0.851544	1	0
164	Malignant neoplasm of thymus, heart, and mediastinum	365	Glaucoma	0.926058	1	0
164	Malignant neoplasm of thymus, heart, and mediastinum	366	Cataract	0.616272	1	0
164	Malignant neoplasm of thymus, heart, and mediastinum	370	Keratitis	1.17798	1	0
164	Malignant neoplasm of thymus, heart, and mediastinum	371	Corneal opacity and other disorders of cornea	0.293529	1	0
164	Malignant neoplasm of thymus, heart, and mediastinum	374	Other disorders of eyelids	1.26621	1	0
164	Malignant neoplasm of thymus, heart, and mediastinum	377	Disorders of optic nerve and visual pathways	1.59825	1	0
164	Malignant neoplasm of thymus, heart, and mediastinum	401	Essential hypertension	0.934391	1	0
164	Malignant neoplasm of thymus, heart, and mediastinum	425	Cardiomyopathy	0.982529	1	0
164	Malignant neoplasm of thymus, heart, and mediastinum	492	Emphysema	2.2321	2.2321	0.802941
164	Malignant neoplasm of thymus, heart, and mediastinum	515	Postinflammatory pulmonary fibrosis	1.71363	1.71363	0.538616
164	Malignant neoplasm of thymus, heart, and mediastinum	523	Gingival and periodontal diseases	3.38649	3.38649	1.21979
164	Malignant neoplasm of thymus, heart, and mediastinum	555	Regional enteritis	0.722498	1	0
164	Malignant neoplasm of thymus, heart, and mediastinum	569	Other disorders of intestine	1.04458	1	0
164	Malignant neoplasm of thymus, heart, and mediastinum	587	Renal sclerosis, unspecified		1	0
164	Malignant neoplasm of thymus, heart, and mediastinum	695	Erythematous conditions	1.42756	1	0
164	Malignant neoplasm of thymus, heart, and mediastinum	706	Diseases of sebaceous glands	2.01649	1	0
164	Malignant neoplasm of thymus, heart, and mediastinum	709	Other disorders of skin and subcutaneous tissue	2.3283	1	0
164	Malignant neoplasm of thymus, heart, and mediastinum	714	Rheumatoid arthritis and other inflammatory polyarthropathies	0.577633	1	0
164	Malignant neoplasm of thymus, heart, and mediastinum	720	Ankylosing spondylitis and other inflammatory spondylopathies	1.47194	1	0
164	Malignant neoplasm of thymus, heart, and mediastinum	728	Disorders of muscle, ligament, and fascia	0.622266	1	0
164	Malignant neoplasm of thymus, heart, and mediastinum	733	Other disorders of bone and cartilage	1.06424	1	0
164	Malignant neoplasm of thymus, heart, and mediastinum	743	Congenital anomalies of eye		1	0
164	Malignant neoplasm of thymus, heart, and mediastinum	744	Congenital anomalies of ear, face, and neck		1	0
164	Malignant neoplasm of thymus, heart, and mediastinum	755	Other congenital anomalies of limbs		1	0
164	Malignant neoplasm of thymus, heart, and mediastinum	756	Other congenital musculoskeletal anomalies	0.611672	1	0
164	Malignant neoplasm of thymus, heart, and mediastinum	757	Congenital anomalies of the integument		1	0
164	Malignant neoplasm of thymus, heart, and mediastinum	758	Chromosomal anomalies		1	0
164	Malignant neoplasm of thymus, heart, and mediastinum	759	Other and unspecified congenital anomalies	1.30683	1	0
164	Malignant neoplasm of thymus, heart, and mediastinum	781	Symptoms involving nervous and musculoskeletal systems	0.748958	1	0
164	Malignant neoplasm of thymus, heart, and mediastinum	995	Certain adverse effects not elsewhere classified	1.24215	1	0
174	Malignant neoplasm of female breast	094	Neurosyphilis	0.477979	0.477979	-0.738189
174	Malignant neoplasm of female breast	153	Malignant neoplasm of colon	0.538919	0.538919	-0.61819
174	Malignant neoplasm of female breast	157	Malignant neoplasm of pancreas	0.477396	0.477396	-0.739408
174	Malignant neoplasm of female breast	161	Malignant neoplasm of larynx	0.19526	0.19526	-1.63342
174	Malignant neoplasm of female breast	170	Malignant neoplasm of bone and articular cartilage	2.68176	2.68176	0.986472
174	Malignant neoplasm of female breast	171	Malignant neoplasm of connective and other soft tissue	1.01307	1	0
174	Malignant neoplasm of female breast	172	Malignant melanoma of skin	0.904837	1	0
174	Malignant neoplasm of female breast	173	Other malignant neoplasm of skin	1.23828	1.23828	0.21372
174	Malignant neoplasm of female breast	176	Kaposi's sarcoma	0.849957	1	0
174	Malignant neoplasm of female breast	183	Malignant neoplasm of ovary and other uterine adnexa	1.11753	1.11753	0.111124
174	Malignant neoplasm of female breast	185	Malignant neoplasm of prostate	0.000382123	0.000382123	-7.86977
174	Malignant neoplasm of female breast	186	Malignant neoplasm of testis		1	0
174	Malignant neoplasm of female breast	188	Malignant neoplasm of bladder	0.245836	0.245836	-1.40309
174	Malignant neoplasm of female breast	190	Malignant neoplasm of eye	0.701298	1	0
174	Malignant neoplasm of female breast	191	Malignant neoplasm of brain	0.830066	0.830066	-0.186251
174	Malignant neoplasm of female breast	193	Malignant neoplasm of thyroid gland	0.802697	1	0
174	Malignant neoplasm of female breast	194	Malignant neoplasm of other endocrine glands and related structures	1.05549	1	0
174	Malignant neoplasm of female breast	200	Lymphosarcoma and reticulosarcoma and other specified malignant tumors of lymphatic tissue	0.668272	0.668272	-0.403059
174	Malignant neoplasm of female breast	202	Other malignant neoplasms of lymphoid and histiocytic tissue	0.645823	0.645823	-0.43723
174	Malignant neoplasm of female breast	203	Multiple myeloma and immunoproliferative neoplasms	0.469634	0.469634	-0.755802
174	Malignant neoplasm of female breast	204	Lymphoid leukemia	0.622568	0.622568	-0.473902
174	Malignant neoplasm of female breast	207	Other specified leukemia	0.524419	1	0
174	Malignant neoplasm of female breast	208	Leukemia of unspecified cell type	0.770807	0.770807	-0.260317
174	Malignant neoplasm of female breast	211	Benign neoplasm of other parts of digestive system	0.527244	0.527244	-0.640092
174	Malignant neoplasm of female breast	216	Benign neoplasm of skin	3.73295	3.73295	1.3172
174	Malignant neoplasm of female breast	237	Neoplasm of uncertain behavior of endocrine glands and nervous system	0.803071	1	0
174	Malignant neoplasm of female breast	238	Neoplasm of uncertain behavior of other and unspecified sites and tissues	0.776658	0.776658	-0.252755
174	Malignant neoplasm of female breast	239	Neoplasms of unspecified nature	1.58267	1.58267	0.459111
174	Malignant neoplasm of female breast	244	Acquired hypothyroidism	1.23718	1.23718	0.212836
174	Malignant neoplasm of female breast	250	Diabetes mellitus	0.849919	0.849919	-0.162614
174	Malignant neoplasm of female breast	251	Other disorders of pancreatic internal secretion	0.656892	0.656892	-0.420236
174	Malignant neoplasm of female breast	255	Disorders of adrenal glands	0.715545	0.715545	-0.33471
174	Malignant neoplasm of female breast	259	Other endocrine disorders	0.768736	1	0
174	Malignant neoplasm of female breast	260	Kwashiorkor	0.697302	0.697302	-0.360537
174	Malignant neoplasm of female breast	268	Vitamin D deficiency	0.559123	0.559123	-0.581385
174	Malignant neoplasm of female breast	270	Disorders of amino-acid transport and metabolism	0.647686	1	0
174	Malignant neoplasm of female breast	271	Disorders of carbohydrate transport and metabolism	0.656946	0.656946	-0.420154
174	Malignant neoplasm of female breast	272	Disorders of lipoid metabolism	0.795932	0.795932	-0.228242
174	Malignant neoplasm of female breast	275	Disorders of mineral metabolism	1.1012	1.1012	0.0964049
174	Malignant neoplasm of female breast	276	Disorders of fluid, electrolyte, and acid-base balance	0.724025	0.724025	-0.322929
174	Malignant neoplasm of female breast	277	Other and unspecified disorders of metabolism	1.13732	1	0
174	Malignant neoplasm of female breast	279	Disorders involving the immune mechanism	0.907035	1	0
174	Malignant neoplasm of female breast	281	Other deficiency anemias	0.687678	0.687678	-0.374435
174	Malignant neoplasm of female breast	282	Hereditary hemolytic anemias	0.612756	0.612756	-0.489789
174	Malignant neoplasm of female breast	283	Acquired hemolytic anemias	0.65429	0.65429	-0.424204
174	Malignant neoplasm of female breast	284	Aplastic anemia and other bone marrow failure syndromes	1.9757	1.9757	0.680925
174	Malignant neoplasm of female breast	285	Other and unspecified anemias	0.824367	0.824367	-0.19314
174	Malignant neoplasm of female breast	286	Coagulation defects	0.720397	0.720397	-0.327952
174	Malignant neoplasm of female breast	287	Purpura and other hemorrhagic conditions	0.966672	1	0
174	Malignant neoplasm of female breast	288	Diseases of white blood cells	1.81153	1.81153	0.594173
174	Malignant neoplasm of female breast	289	Other diseases of blood and blood-forming organs	0.997876	1	0
174	Malignant neoplasm of female breast	330	Cerebral degenerations usually manifest in childhood	0.528061	1	0
174	Malignant neoplasm of female breast	331	Other cerebral degenerations	0.554076	0.554076	-0.590454
174	Malignant neoplasm of female breast	332	Parkinson's disease	0.573122	0.573122	-0.556657
174	Malignant neoplasm of female breast	333	Other extrapyramidal disease and abnormal movement disorders	0.726228	0.726228	-0.319892
174	Malignant neoplasm of female breast	334	Spinocerebellar disease	0.657189	0.657189	-0.419784
174	Malignant neoplasm of female breast	335	Anterior horn cell disease	0.350289	0.350289	-1.049
174	Malignant neoplasm of female breast	355	Mononeuritis of lower limb	0.647731	0.647731	-0.43428
174	Malignant neoplasm of female breast	356	Hereditary and idiopathic peripheral neuropathy	0.575526	0.575526	-0.552472
174	Malignant neoplasm of female breast	362	Other retinal disorders	0.637365	0.637365	-0.450412
174	Malignant neoplasm of female breast	365	Glaucoma	0.986381	1	0
174	Malignant neoplasm of female breast	366	Cataract	0.759912	0.759912	-0.274553
174	Malignant neoplasm of female breast	370	Keratitis	0.522567	0.522567	-0.649002
174	Malignant neoplasm of female breast	371	Corneal opacity and other disorders of cornea	0.631774	0.631774	-0.459223
174	Malignant neoplasm of female breast	374	Other disorders of eyelids	0.69693	0.69693	-0.36107
174	Malignant neoplasm of female breast	377	Disorders of optic nerve and visual pathways	0.571143	0.571143	-0.560116
174	Malignant neoplasm of female breast	401	Essential hypertension	1.0542	1.0542	0.0527864
174	Malignant neoplasm of female breast	425	Cardiomyopathy	0.484291	0.484291	-0.725069
174	Malignant neoplasm of female breast	492	Emphysema	0.567613	0.567613	-0.566316
174	Malignant neoplasm of female breast	515	Postinflammatory pulmonary fibrosis	0.701272	0.701272	-0.35486
174	Malignant neoplasm of female breast	523	Gingival and periodontal diseases	0.606479	0.606479	-0.500085
174	Malignant neoplasm of female breast	555	Regional enteritis	0.551988	0.551988	-0.594229
174	Malignant neoplasm of female breast	569	Other disorders of intestine	0.572904	0.572904	-0.557037
174	Malignant neoplasm of female breast	587	Renal sclerosis, unspecified	0.599421	0.599421	-0.511792
174	Malignant neoplasm of female breast	695	Erythematous conditions	0.951878	1	0
174	Malignant neoplasm of female breast	706	Diseases of sebaceous glands	1.74601	1.74601	0.557332
174	Malignant neoplasm of female breast	709	Other disorders of skin and subcutaneous tissue	1.71904	1.71904	0.541768
174	Malignant neoplasm of female breast	714	Rheumatoid arthritis and other inflammatory polyarthropathies	0.688857	0.688857	-0.372722
174	Malignant neoplasm of female breast	720	Ankylosing spondylitis and other inflammatory spondylopathies	0.427252	0.427252	-0.850381
174	Malignant neoplasm of female breast	728	Disorders of muscle, ligament, and fascia	0.657524	0.657524	-0.419275
174	Malignant neoplasm of female breast	733	Other disorders of bone and cartilage	1.09005	1.09005	0.0862218
174	Malignant neoplasm of female breast	743	Congenital anomalies of eye	1.10063	1	0
174	Malignant neoplasm of female breast	744	Congenital anomalies of ear, face, and neck	0.442741	1	0
174	Malignant neoplasm of female breast	755	Other congenital anomalies of limbs	0.728213	1	0
174	Malignant neoplasm of female breast	756	Other congenital musculoskeletal anomalies	0.678364	0.678364	-0.388072
174	Malignant neoplasm of female breast	757	Congenital anomalies of the integument	1.62928	1.62928	0.488138
174	Malignant neoplasm of female breast	758	Chromosomal anomalies	0.748433	1	0
174	Malignant neoplasm of female breast	759	Other and unspecified congenital anomalies	0.815911	1	0
174	Malignant neoplasm of female breast	781	Symptoms involving nervous and musculoskeletal systems	0.637115	0.637115	-0.450805
174	Malignant neoplasm of female breast	995	Certain adverse effects not elsewhere classified	0.690346	0.690346	-0.370562
200	Lymphosarcoma and reticulosarcoma and other specified malignant tumors of lymphatic tissue	094	Neurosyphilis	0.717567	1	0
200	Lymphosarcoma and reticulosarcoma and other specified malignant tumors of lymphatic tissue	153	Malignant neoplasm of colon	1.03946	1	0
200	Lymphosarcoma and reticulosarcoma and other specified malignant tumors of lymphatic tissue	157	Malignant neoplasm of pancreas	1.11754	1	0
200	Lymphosarcoma and reticulosarcoma and other specified malignant tumors of lymphatic tissue	161	Malignant neoplasm of larynx	0.886514	1	0
200	Lymphosarcoma and reticulosarcoma and other specified malignant tumors of lymphatic tissue	170	Malignant neoplasm of bone and articular cartilage	6.20288	6.20288	1.82501
200	Lymphosarcoma and reticulosarcoma and other specified malignant tumors of lymphatic tissue	171	Malignant neoplasm of connective and other soft tissue	6.29584	6.29584	1.83989
200	Lymphosarcoma and reticulosarcoma and other specified malignant tumors of lymphatic tissue	172	Malignant melanoma of skin	2.10999	2.10999	0.746682
200	Lymphosarcoma and reticulosarcoma and other specified malignant tumors of lymphatic tissue	173	Other malignant neoplasm of skin	2.76038	2.76038	1.01537
200	Lymphosarcoma and reticulosarcoma and other specified malignant tumors of lymphatic tissue	176	Kaposi's sarcoma	5.97637	5.97637	1.78781
200	Lymphosarcoma and reticulosarcoma and other specified malignant tumors of lymphatic tissue	183	Malignant neoplasm of ovary and other uterine adnexa	0.805124	1	0
200	Lymphosarcoma and reticulosarcoma and other specified malignant tumors of lymphatic tissue	185	Malignant neoplasm of prostate	0.898603	0.898603	-0.106914
200	Lymphosarcoma and reticulosarcoma and other specified malignant tumors of lymphatic tissue	186	Malignant neoplasm of testis	22.683	22.683	3.12162
200	Lymphosarcoma and reticulosarcoma and other specified malignant tumors of lymphatic tissue	188	Malignant neoplasm of bladder	0.832393	1	0
200	Lymphosarcoma and reticulosarcoma and other specified malignant tumors of lymphatic tissue	190	Malignant neoplasm of eye	2.1916	2.1916	0.784631
200	Lymphosarcoma and reticulosarcoma and other specified malignant tumors of lymphatic tissue	191	Malignant neoplasm of brain	4.10301	4.10301	1.41172
200	Lymphosarcoma and reticulosarcoma and other specified malignant tumors of lymphatic tissue	193	Malignant neoplasm of thyroid gland	2.84048	2.84048	1.04397
200	Lymphosarcoma and reticulosarcoma and other specified malignant tumors of lymphatic tissue	194	Malignant neoplasm of other endocrine glands and related structures	1.97909	1	0
200	Lymphosarcoma and reticulosarcoma and other specified malignant tumors of lymphatic tissue	201	Hodgkin's disease	34.1023	34.1023	3.52937
200	Lymphosarcoma and reticulosarcoma and other specified malignant tumors of lymphatic tissue	202	Other malignant neoplasms of lymphoid and histiocytic tissue	115.938	115.938	4.75306
200	Lymphosarcoma and reticulosarcoma and other specified malignant tumors of lymphatic tissue	203	Multiple myeloma and immunoproliferative neoplasms	3.1208	3.1208	1.13809
200	Lymphosarcoma and reticulosarcoma and other specified malignant tumors of lymphatic tissue	204	Lymphoid leukemia	22.9533	22.9533	3.13346
200	Lymphosarcoma and reticulosarcoma and other specified malignant tumors of lymphatic tissue	207	Other specified leukemia	51.6235	51.6235	3.94398
200	Lymphosarcoma and reticulosarcoma and other specified malignant tumors of lymphatic tissue	208	Leukemia of unspecified cell type	15.4081	15.4081	2.73489
200	Lymphosarcoma and reticulosarcoma and other specified malignant tumors of lymphatic tissue	211	Benign neoplasm of other parts of digestive system	1.29218	1.29218	0.256327
200	Lymphosarcoma and reticulosarcoma and other specified malignant tumors of lymphatic tissue	216	Benign neoplasm of skin	1.93851	1.93851	0.661919
200	Lymphosarcoma and reticulosarcoma and other specified malignant tumors of lymphatic tissue	217	Benign neoplasm of breast	0.91846	1	0
200	Lymphosarcoma and reticulosarcoma and other specified malignant tumors of lymphatic tissue	231	Carcinoma in situ of respiratory system	0.323309	1	0
200	Lymphosarcoma and reticulosarcoma and other specified malignant tumors of lymphatic tissue	237	Neoplasm of uncertain behavior of endocrine glands and nervous system	3.14751	3.14751	1.14661
200	Lymphosarcoma and reticulosarcoma and other specified malignant tumors of lymphatic tissue	238	Neoplasm of uncertain behavior of other and unspecified sites and tissues	3.62329	3.62329	1.28738
200	Lymphosarcoma and reticulosarcoma and other specified malignant tumors of lymphatic tissue	239	Neoplasms of unspecified nature	2.83708	2.83708	1.04277
200	Lymphosarcoma and reticulosarcoma and other specified malignant tumors of lymphatic tissue	244	Acquired hypothyroidism	1.2785	1.2785	0.245688
200	Lymphosarcoma and reticulosarcoma and other specified malignant tumors of lymphatic tissue	250	Diabetes mellitus	0.959451	1	0
200	Lymphosarcoma and reticulosarcoma and other specified malignant tumors of lymphatic tissue	251	Other disorders of pancreatic internal secretion	1.84375	1.84375	0.611803
200	Lymphosarcoma and reticulosarcoma and other specified malignant tumors of lymphatic tissue	255	Disorders of adrenal glands	2.92273	2.92273	1.07252
200	Lymphosarcoma and reticulosarcoma and other specified malignant tumors of lymphatic tissue	259	Other endocrine disorders	1.08995	1	0
200	Lymphosarcoma and reticulosarcoma and other specified malignant tumors of lymphatic tissue	260	Kwashiorkor	4.06767	4.06767	1.40307
200	Lymphosarcoma and reticulosarcoma and other specified malignant tumors of lymphatic tissue	268	Vitamin D deficiency	1.45608	1	0
200	Lymphosarcoma and reticulosarcoma and other specified malignant tumors of lymphatic tissue	270	Disorders of amino-acid transport and metabolism	0.817407	1	0
200	Lymphosarcoma and reticulosarcoma and other specified malignant tumors of lymphatic tissue	271	Disorders of carbohydrate transport and metabolism	1.02431	1	0
200	Lymphosarcoma and reticulosarcoma and other specified malignant tumors of lymphatic tissue	272	Disorders of lipoid metabolism	0.63064	0.63064	-0.461019
200	Lymphosarcoma and reticulosarcoma and other specified malignant tumors of lymphatic tissue	275	Disorders of mineral metabolism	4.4703	4.4703	1.49745
200	Lymphosarcoma and reticulosarcoma and other specified malignant tumors of lymphatic tissue	276	Disorders of fluid, electrolyte, and acid-base balance	1.72686	1.72686	0.546305
200	Lymphosarcoma and reticulosarcoma and other specified malignant tumors of lymphatic tissue	277	Other and unspecified disorders of metabolism	2.22498	2.22498	0.799746
200	Lymphosarcoma and reticulosarcoma and other specified malignant tumors of lymphatic tissue	279	Disorders involving the immune mechanism	18.9523	18.9523	2.94192
200	Lymphosarcoma and reticulosarcoma and other specified malignant tumors of lymphatic tissue	281	Other deficiency anemias	1.52435	1.52435	0.421565
200	Lymphosarcoma and reticulosarcoma and other specified malignant tumors of lymphatic tissue	282	Hereditary hemolytic anemias	5.16936	5.16936	1.64275
200	Lymphosarcoma and reticulosarcoma and other specified malignant tumors of lymphatic tissue	283	Acquired hemolytic anemias	14.4918	14.4918	2.67358
200	Lymphosarcoma and reticulosarcoma and other specified malignant tumors of lymphatic tissue	284	Aplastic anemia and other bone marrow failure syndromes	22.9503	22.9503	3.13333
200	Lymphosarcoma and reticulosarcoma and other specified malignant tumors of lymphatic tissue	285	Other and unspecified anemias	2.16881	2.16881	0.774178
200	Lymphosarcoma and reticulosarcoma and other specified malignant tumors of lymphatic tissue	286	Coagulation defects	2.04517	2.04517	0.715481
200	Lymphosarcoma and reticulosarcoma and other specified malignant tumors of lymphatic tissue	287	Purpura and other hemorrhagic conditions	8.64298	8.64298	2.15675
200	Lymphosarcoma and reticulosarcoma and other specified malignant tumors of lymphatic tissue	288	Diseases of white blood cells	19.1079	19.1079	2.9501
200	Lymphosarcoma and reticulosarcoma and other specified malignant tumors of lymphatic tissue	289	Other diseases of blood and blood-forming organs	5.68161	5.68161	1.73724
200	Lymphosarcoma and reticulosarcoma and other specified malignant tumors of lymphatic tissue	330	Cerebral degenerations usually manifest in childhood	0.962629	1	0
200	Lymphosarcoma and reticulosarcoma and other specified malignant tumors of lymphatic tissue	331	Other cerebral degenerations	0.486497	0.486497	-0.720525
200	Lymphosarcoma and reticulosarcoma and other specified malignant tumors of lymphatic tissue	332	Parkinson's disease	0.697596	0.697596	-0.360116
200	Lymphosarcoma and reticulosarcoma and other specified malignant tumors of lymphatic tissue	333	Other extrapyramidal disease and abnormal movement disorders	0.981547	1	0
200	Lymphosarcoma and reticulosarcoma and other specified malignant tumors of lymphatic tissue	334	Spinocerebellar disease	1.37178	1	0
200	Lymphosarcoma and reticulosarcoma and other specified malignant tumors of lymphatic tissue	335	Anterior horn cell disease	1.0217	1	0
200	Lymphosarcoma and reticulosarcoma and other specified malignant tumors of lymphatic tissue	355	Mononeuritis of lower limb	2.69738	2.69738	0.992281
200	Lymphosarcoma and reticulosarcoma and other specified malignant tumors of lymphatic tissue	356	Hereditary and idiopathic peripheral neuropathy	2.63126	2.63126	0.967463
200	Lymphosarcoma and reticulosarcoma and other specified malignant tumors of lymphatic tissue	362	Other retinal disorders	0.896919	1	0
200	Lymphosarcoma and reticulosarcoma and other specified malignant tumors of lymphatic tissue	365	Glaucoma	0.969988	1	0
200	Lymphosarcoma and reticulosarcoma and other specified malignant tumors of lymphatic tissue	366	Cataract	0.957976	1	0
200	Lymphosarcoma and reticulosarcoma and other specified malignant tumors of lymphatic tissue	370	Keratitis	1.58769	1	0
200	Lymphosarcoma and reticulosarcoma and other specified malignant tumors of lymphatic tissue	371	Corneal opacity and other disorders of cornea	0.73849	1	0
200	Lymphosarcoma and reticulosarcoma and other specified malignant tumors of lymphatic tissue	374	Other disorders of eyelids	1.99103	1.99103	0.688654
200	Lymphosarcoma and reticulosarcoma and other specified malignant tumors of lymphatic tissue	377	Disorders of optic nerve and visual pathways	1.72331	1.72331	0.544246
200	Lymphosarcoma and reticulosarcoma and other specified malignant tumors of lymphatic tissue	401	Essential hypertension	0.861409	0.861409	-0.149186
200	Lymphosarcoma and reticulosarcoma and other specified malignant tumors of lymphatic tissue	425	Cardiomyopathy	1.36118	1.36118	0.30835
200	Lymphosarcoma and reticulosarcoma and other specified malignant tumors of lymphatic tissue	492	Emphysema	1.02091	1	0
200	Lymphosarcoma and reticulosarcoma and other specified malignant tumors of lymphatic tissue	515	Postinflammatory pulmonary fibrosis	1.76217	1.76217	0.566548
200	Lymphosarcoma and reticulosarcoma and other specified malignant tumors of lymphatic tissue	516	Other alveolar and parietoalveolar pneumonopathy	3.29025	3.29025	1.19096
200	Lymphosarcoma and reticulosarcoma and other specified malignant tumors of lymphatic tissue	523	Gingival and periodontal diseases	2.79945	2.79945	1.02942
200	Lymphosarcoma and reticulosarcoma and other specified malignant tumors of lymphatic tissue	528	Diseases of the oral soft tissues, excluding lesions specific for gingiva and tongue	13.6284	13.6284	2.61216
200	Lymphosarcoma and reticulosarcoma and other specified malignant tumors of lymphatic tissue	555	Regional enteritis	1.1469	1	0
200	Lymphosarcoma and reticulosarcoma and other specified malignant tumors of lymphatic tissue	569	Other disorders of intestine	1.89507	1.89507	0.639258
200	Lymphosarcoma and reticulosarcoma and other specified malignant tumors of lymphatic tissue	587	Renal sclerosis, unspecified	1.40492	1	0
200	Lymphosarcoma and reticulosarcoma and other specified malignant tumors of lymphatic tissue	695	Erythematous conditions	2.13786	2.13786	0.759803
200	Lymphosarcoma and reticulosarcoma and other specified malignant tumors of lymphatic tissue	706	Diseases of sebaceous glands	1.19585	1	0
200	Lymphosarcoma and reticulosarcoma and other specified malignant tumors of lymphatic tissue	709	Other disorders of skin and subcutaneous tissue	2.22281	2.22281	0.798774
200	Lymphosarcoma and reticulosarcoma and other specified malignant tumors of lymphatic tissue	714	Rheumatoid arthritis and other inflammatory polyarthropathies	1.16204	1.16204	0.150176
200	Lymphosarcoma and reticulosarcoma and other specified malignant tumors of lymphatic tissue	720	Ankylosing spondylitis and other inflammatory spondylopathies	1.05807	1	0
200	Lymphosarcoma and reticulosarcoma and other specified malignant tumors of lymphatic tissue	728	Disorders of muscle, ligament, and fascia	1.12525	1	0
200	Lymphosarcoma and reticulosarcoma and other specified malignant tumors of lymphatic tissue	733	Other disorders of bone and cartilage	1.63678	1.63678	0.492733
200	Lymphosarcoma and reticulosarcoma and other specified malignant tumors of lymphatic tissue	743	Congenital anomalies of eye	1.41628	1	0
200	Lymphosarcoma and reticulosarcoma and other specified malignant tumors of lymphatic tissue	744	Congenital anomalies of ear, face, and neck	1.61419	1	0
200	Lymphosarcoma and reticulosarcoma and other specified malignant tumors of lymphatic tissue	755	Other congenital anomalies of limbs	0.558946	1	0
200	Lymphosarcoma and reticulosarcoma and other specified malignant tumors of lymphatic tissue	756	Other congenital musculoskeletal anomalies	0.714493	1	0
200	Lymphosarcoma and reticulosarcoma and other specified malignant tumors of lymphatic tissue	757	Congenital anomalies of the integument	1.78206	1	0
200	Lymphosarcoma and reticulosarcoma and other specified malignant tumors of lymphatic tissue	758	Chromosomal anomalies		1	0
200	Lymphosarcoma and reticulosarcoma and other specified malignant tumors of lymphatic tissue	759	Other and unspecified congenital anomalies	3.52271	3.52271	1.25923
200	Lymphosarcoma and reticulosarcoma and other specified malignant tumors of lymphatic tissue	781	Symptoms involving nervous and musculoskeletal systems	1.09694	1	0
200	Lymphosarcoma and reticulosarcoma and other specified malignant tumors of lymphatic tissue	995	Certain adverse effects not elsewhere classified	1.1695	1	0
201	Hodgkin's disease	094	Neurosyphilis	0.985131	1	0
201	Hodgkin's disease	153	Malignant neoplasm of colon	1.0922	1	0
201	Hodgkin's disease	157	Malignant neoplasm of pancreas	1.38876	1	0
201	Hodgkin's disease	161	Malignant neoplasm of larynx	0.968127	1	0
201	Hodgkin's disease	170	Malignant neoplasm of bone and articular cartilage	4.04139	4.04139	1.39659
201	Hodgkin's disease	171	Malignant neoplasm of connective and other soft tissue	2.42015	1	0
201	Hodgkin's disease	172	Malignant melanoma of skin	1.93117	1	0
201	Hodgkin's disease	173	Other malignant neoplasm of skin	1.05367	1	0
201	Hodgkin's disease	176	Kaposi's sarcoma	3.19076	1	0
201	Hodgkin's disease	183	Malignant neoplasm of ovary and other uterine adnexa	0.879244	1	0
201	Hodgkin's disease	185	Malignant neoplasm of prostate	0.769849	0.769849	-0.261561
201	Hodgkin's disease	186	Malignant neoplasm of testis		1	0
201	Hodgkin's disease	188	Malignant neoplasm of bladder	1.09083	1	0
201	Hodgkin's disease	190	Malignant neoplasm of eye		1	0
201	Hodgkin's disease	191	Malignant neoplasm of brain	0.838947	1	0
201	Hodgkin's disease	193	Malignant neoplasm of thyroid gland	1.55099	1	0
201	Hodgkin's disease	194	Malignant neoplasm of other endocrine glands and related structures		1	0
201	Hodgkin's disease	202	Other malignant neoplasms of lymphoid and histiocytic tissue	52.012	52.012	3.95148
201	Hodgkin's disease	203	Multiple myeloma and immunoproliferative neoplasms	1.49025	1	0
201	Hodgkin's disease	204	Lymphoid leukemia	7.3528	7.3528	1.99508
201	Hodgkin's disease	207	Other specified leukemia	4.5936	1	0
201	Hodgkin's disease	208	Leukemia of unspecified cell type	5.5877	5.5877	1.72057
201	Hodgkin's disease	211	Benign neoplasm of other parts of digestive system	1.29758	1.29758	0.260502
201	Hodgkin's disease	216	Benign neoplasm of skin	0.582167	1	0
201	Hodgkin's disease	237	Neoplasm of uncertain behavior of endocrine glands and nervous system	1.05516	1	0
201	Hodgkin's disease	238	Neoplasm of uncertain behavior of other and unspecified sites and tissues	3.34403	3.34403	1.20718
201	Hodgkin's disease	239	Neoplasms of unspecified nature	2.33281	2.33281	0.847073
201	Hodgkin's disease	244	Acquired hypothyroidism	1.72815	1.72815	0.547054
201	Hodgkin's disease	250	Diabetes mellitus	1.07397	1	0
201	Hodgkin's disease	251	Other disorders of pancreatic internal secretion	1.82711	1.82711	0.602735
201	Hodgkin's disease	255	Disorders of adrenal glands	3.51098	3.51098	1.25589
201	Hodgkin's disease	259	Other endocrine disorders	0.748185	1	0
201	Hodgkin's disease	260	Kwashiorkor	3.17613	3.17613	1.15566
201	Hodgkin's disease	268	Vitamin D deficiency		1	0
201	Hodgkin's disease	270	Disorders of amino-acid transport and metabolism	1.30923	1	0
201	Hodgkin's disease	271	Disorders of carbohydrate transport and metabolism	1.02846	1	0
201	Hodgkin's disease	272	Disorders of lipoid metabolism	0.671716	0.671716	-0.397919
201	Hodgkin's disease	275	Disorders of mineral metabolism	3.21029	3.21029	1.16636
201	Hodgkin's disease	276	Disorders of fluid, electrolyte, and acid-base balance	1.72293	1.72293	0.544024
201	Hodgkin's disease	277	Other and unspecified disorders of metabolism	1.45789	1	0
201	Hodgkin's disease	279	Disorders involving the immune mechanism	15.123	15.123	2.71622
201	Hodgkin's disease	281	Other deficiency anemias	1.76907	1.76907	0.570456
201	Hodgkin's disease	282	Hereditary hemolytic anemias	5.19889	5.19889	1.64845
201	Hodgkin's disease	283	Acquired hemolytic anemias	10.3161	10.3161	2.33371
201	Hodgkin's disease	284	Aplastic anemia and other bone marrow failure syndromes	23.2646	23.2646	3.14693
201	Hodgkin's disease	285	Other and unspecified anemias	2.14498	2.14498	0.763131
201	Hodgkin's disease	286	Coagulation defects	2.17085	2.17085	0.775119
201	Hodgkin's disease	287	Purpura and other hemorrhagic conditions	7.21547	7.21547	1.97623
201	Hodgkin's disease	288	Diseases of white blood cells	16.7884	16.7884	2.82069
201	Hodgkin's disease	289	Other diseases of blood and blood-forming organs	5.23678	5.23678	1.65571
201	Hodgkin's disease	330	Cerebral degenerations usually manifest in childhood		1	0
201	Hodgkin's disease	331	Other cerebral degenerations	0.538222	0.538222	-0.619484
201	Hodgkin's disease	332	Parkinson's disease	0.899316	1	0
201	Hodgkin's disease	333	Other extrapyramidal disease and abnormal movement disorders	1.22277	1	0
201	Hodgkin's disease	334	Spinocerebellar disease	1.05464	1	0
201	Hodgkin's disease	335	Anterior horn cell disease	0.736398	1	0
201	Hodgkin's disease	355	Mononeuritis of lower limb	2.42045	2.42045	0.883952
201	Hodgkin's disease	356	Hereditary and idiopathic peripheral neuropathy	3.29255	3.29255	1.19166
201	Hodgkin's disease	362	Other retinal disorders	0.714888	1	0
201	Hodgkin's disease	365	Glaucoma	0.936741	1	0
201	Hodgkin's disease	366	Cataract	1.14413	1	0
201	Hodgkin's disease	370	Keratitis	1.78009	1	0
201	Hodgkin's disease	371	Corneal opacity and other disorders of cornea	0.63366	1	0
201	Hodgkin's disease	374	Other disorders of eyelids	0.820033	1	0
201	Hodgkin's disease	377	Disorders of optic nerve and visual pathways	2.07015	1	0
201	Hodgkin's disease	401	Essential hypertension	0.832066	0.832066	-0.183843
201	Hodgkin's disease	425	Cardiomyopathy	1.1955	1	0
201	Hodgkin's disease	492	Emphysema	1.23906	1.23906	0.214354
201	Hodgkin's disease	515	Postinflammatory pulmonary fibrosis	3.24719	3.24719	1.17779
201	Hodgkin's disease	523	Gingival and periodontal diseases	2.3394	1	0
201	Hodgkin's disease	555	Regional enteritis	1.66368	1	0
201	Hodgkin's disease	569	Other disorders of intestine	1.43891	1.43891	0.363888
201	Hodgkin's disease	587	Renal sclerosis, unspecified	0.750081	1	0
201	Hodgkin's disease	695	Erythematous conditions	2.05451	2.05451	0.720037
201	Hodgkin's disease	706	Diseases of sebaceous glands	1.74125	1	0
201	Hodgkin's disease	709	Other disorders of skin and subcutaneous tissue	2.38747	2.38747	0.870233
201	Hodgkin's disease	714	Rheumatoid arthritis and other inflammatory polyarthropathies	1.66263	1.66263	0.508403
201	Hodgkin's disease	720	Ankylosing spondylitis and other inflammatory spondylopathies	1.05919	1	0
201	Hodgkin's disease	728	Disorders of muscle, ligament, and fascia	1.44408	1	0
201	Hodgkin's disease	733	Other disorders of bone and cartilage	1.39631	1.39631	0.333835
201	Hodgkin's disease	743	Congenital anomalies of eye		1	0
201	Hodgkin's disease	744	Congenital anomalies of ear, face, and neck	7.75629	7.75629	2.0485
201	Hodgkin's disease	755	Other congenital anomalies of limbs	0.671443	1	0
201	Hodgkin's disease	756	Other congenital musculoskeletal anomalies	0.792274	1	0
201	Hodgkin's disease	757	Congenital anomalies of the integument	1.22327	1	0
201	Hodgkin's disease	758	Chromosomal anomalies		1	0
201	Hodgkin's disease	759	Other and unspecified congenital anomalies	1.69269	1	0
201	Hodgkin's disease	781	Symptoms involving nervous and musculoskeletal systems	1.13178	1	0
201	Hodgkin's disease	995	Certain adverse effects not elsewhere classified	1.37574	1	0
202	Other malignant neoplasms of lymphoid and histiocytic tissue	094	Neurosyphilis	0.751191	1	0
202	Other malignant neoplasms of lymphoid and histiocytic tissue	153	Malignant neoplasm of colon	1.00623	1	0
202	Other malignant neoplasms of lymphoid and histiocytic tissue	157	Malignant neoplasm of pancreas	1.60299	1.60299	0.471869
202	Other malignant neoplasms of lymphoid and histiocytic tissue	161	Malignant neoplasm of larynx	1.05957	1	0
202	Other malignant neoplasms of lymphoid and histiocytic tissue	170	Malignant neoplasm of bone and articular cartilage	6.20867	6.20867	1.82595
202	Other malignant neoplasms of lymphoid and histiocytic tissue	171	Malignant neoplasm of connective and other soft tissue	5.04781	5.04781	1.61896
202	Other malignant neoplasms of lymphoid and histiocytic tissue	172	Malignant melanoma of skin	2.29548	2.29548	0.830941
202	Other malignant neoplasms of lymphoid and histiocytic tissue	173	Other malignant neoplasm of skin	2.91355	2.91355	1.06937
202	Other malignant neoplasms of lymphoid and histiocytic tissue	176	Kaposi's sarcoma	6.2973	6.2973	1.84012
202	Other malignant neoplasms of lymphoid and histiocytic tissue	183	Malignant neoplasm of ovary and other uterine adnexa	0.922854	1	0
202	Other malignant neoplasms of lymphoid and histiocytic tissue	185	Malignant neoplasm of prostate	0.824547	0.824547	-0.192921
202	Other malignant neoplasms of lymphoid and histiocytic tissue	186	Malignant neoplasm of testis	20.0987	20.0987	3.00065
202	Other malignant neoplasms of lymphoid and histiocytic tissue	188	Malignant neoplasm of bladder	0.952479	1	0
202	Other malignant neoplasms of lymphoid and histiocytic tissue	190	Malignant neoplasm of eye	1.33834	1	0
202	Other malignant neoplasms of lymphoid and histiocytic tissue	191	Malignant neoplasm of brain	4.10174	4.10174	1.41141
202	Other malignant neoplasms of lymphoid and histiocytic tissue	193	Malignant neoplasm of thyroid gland	1.94793	1.94793	0.666768
202	Other malignant neoplasms of lymphoid and histiocytic tissue	194	Malignant neoplasm of other endocrine glands and related structures	3.98115	3.98115	1.38157
202	Other malignant neoplasms of lymphoid and histiocytic tissue	203	Multiple myeloma and immunoproliferative neoplasms	3.5177	3.5177	1.25781
202	Other malignant neoplasms of lymphoid and histiocytic tissue	204	Lymphoid leukemia	13.5826	13.5826	2.60879
202	Other malignant neoplasms of lymphoid and histiocytic tissue	207	Other specified leukemia	39.5605	39.5605	3.67783
202	Other malignant neoplasms of lymphoid and histiocytic tissue	208	Leukemia of unspecified cell type	15.4767	15.4767	2.73933
202	Other malignant neoplasms of lymphoid and histiocytic tissue	211	Benign neoplasm of other parts of digestive system	1.25108	1.25108	0.224009
202	Other malignant neoplasms of lymphoid and histiocytic tissue	216	Benign neoplasm of skin	1.74956	1.74956	0.559366
202	Other malignant neoplasms of lymphoid and histiocytic tissue	217	Benign neoplasm of breast	1.10855	1	0
202	Other malignant neoplasms of lymphoid and histiocytic tissue	231	Carcinoma in situ of respiratory system	2.50857	2.50857	0.919714
202	Other malignant neoplasms of lymphoid and histiocytic tissue	237	Neoplasm of uncertain behavior of endocrine glands and nervous system	2.96595	2.96595	1.0872
202	Other malignant neoplasms of lymphoid and histiocytic tissue	238	Neoplasm of uncertain behavior of other and unspecified sites and tissues	4.50461	4.50461	1.5051
202	Other malignant neoplasms of lymphoid and histiocytic tissue	239	Neoplasms of unspecified nature	3.10642	3.10642	1.13347
202	Other malignant neoplasms of lymphoid and histiocytic tissue	244	Acquired hypothyroidism	1.27867	1.27867	0.24582
202	Other malignant neoplasms of lymphoid and histiocytic tissue	250	Diabetes mellitus	0.934259	0.934259	-0.0680015
202	Other malignant neoplasms of lymphoid and histiocytic tissue	251	Other disorders of pancreatic internal secretion	1.5781	1.5781	0.45622
202	Other malignant neoplasms of lymphoid and histiocytic tissue	255	Disorders of adrenal glands	2.16278	2.16278	0.771392
202	Other malignant neoplasms of lymphoid and histiocytic tissue	259	Other endocrine disorders	1.20814	1	0
202	Other malignant neoplasms of lymphoid and histiocytic tissue	260	Kwashiorkor	2.8712	2.8712	1.05473
202	Other malignant neoplasms of lymphoid and histiocytic tissue	268	Vitamin D deficiency	1.25531	1	0
202	Other malignant neoplasms of lymphoid and histiocytic tissue	270	Disorders of amino-acid transport and metabolism	1.4094	1	0
202	Other malignant neoplasms of lymphoid and histiocytic tissue	271	Disorders of carbohydrate transport and metabolism	1.08078	1	0
202	Other malignant neoplasms of lymphoid and histiocytic tissue	272	Disorders of lipoid metabolism	0.611055	0.611055	-0.492568
202	Other malignant neoplasms of lymphoid and histiocytic tissue	275	Disorders of mineral metabolism	3.40899	3.40899	1.22642
202	Other malignant neoplasms of lymphoid and histiocytic tissue	276	Disorders of fluid, electrolyte, and acid-base balance	1.58559	1.58559	0.460957
202	Other malignant neoplasms of lymphoid and histiocytic tissue	277	Other and unspecified disorders of metabolism	2.07078	2.07078	0.727924
202	Other malignant neoplasms of lymphoid and histiocytic tissue	279	Disorders involving the immune mechanism	15.6018	15.6018	2.74739
202	Other malignant neoplasms of lymphoid and histiocytic tissue	281	Other deficiency anemias	1.57867	1.57867	0.456583
202	Other malignant neoplasms of lymphoid and histiocytic tissue	282	Hereditary hemolytic anemias	4.43069	4.43069	1.48856
202	Other malignant neoplasms of lymphoid and histiocytic tissue	283	Acquired hemolytic anemias	11.5939	11.5939	2.45048
202	Other malignant neoplasms of lymphoid and histiocytic tissue	284	Aplastic anemia and other bone marrow failure syndromes	19.2326	19.2326	2.95661
202	Other malignant neoplasms of lymphoid and histiocytic tissue	285	Other and unspecified anemias	2.00386	2.00386	0.695075
202	Other malignant neoplasms of lymphoid and histiocytic tissue	286	Coagulation defects	1.91604	1.91604	0.650262
202	Other malignant neoplasms of lymphoid and histiocytic tissue	287	Purpura and other hemorrhagic conditions	7.34044	7.34044	1.9934
202	Other malignant neoplasms of lymphoid and histiocytic tissue	288	Diseases of white blood cells	15.8434	15.8434	2.76275
202	Other malignant neoplasms of lymphoid and histiocytic tissue	289	Other diseases of blood and blood-forming organs	5.30238	5.30238	1.66816
202	Other malignant neoplasms of lymphoid and histiocytic tissue	330	Cerebral degenerations usually manifest in childhood	0.8299	1	0
202	Other malignant neoplasms of lymphoid and histiocytic tissue	331	Other cerebral degenerations	0.517426	0.517426	-0.658889
202	Other malignant neoplasms of lymphoid and histiocytic tissue	332	Parkinson's disease	0.716663	0.716663	-0.33315
202	Other malignant neoplasms of lymphoid and histiocytic tissue	333	Other extrapyramidal disease and abnormal movement disorders	1.08127	1	0
202	Other malignant neoplasms of lymphoid and histiocytic tissue	334	Spinocerebellar disease	1.18264	1	0
202	Other malignant neoplasms of lymphoid and histiocytic tissue	335	Anterior horn cell disease	0.880823	1	0
202	Other malignant neoplasms of lymphoid and histiocytic tissue	355	Mononeuritis of lower limb	2.29744	2.29744	0.831797
202	Other malignant neoplasms of lymphoid and histiocytic tissue	356	Hereditary and idiopathic peripheral neuropathy	2.50869	2.50869	0.919762
202	Other malignant neoplasms of lymphoid and histiocytic tissue	362	Other retinal disorders	0.762256	0.762256	-0.271473
202	Other malignant neoplasms of lymphoid and histiocytic tissue	365	Glaucoma	0.929502	1	0
202	Other malignant neoplasms of lymphoid and histiocytic tissue	366	Cataract	0.964332	1	0
202	Other malignant neoplasms of lymphoid and histiocytic tissue	370	Keratitis	1.64253	1.64253	0.496239
202	Other malignant neoplasms of lymphoid and histiocytic tissue	371	Corneal opacity and other disorders of cornea	0.784463	1	0
202	Other malignant neoplasms of lymphoid and histiocytic tissue	374	Other disorders of eyelids	2.57476	2.57476	0.945756
202	Other malignant neoplasms of lymphoid and histiocytic tissue	377	Disorders of optic nerve and visual pathways	1.70236	1.70236	0.532015
202	Other malignant neoplasms of lymphoid and histiocytic tissue	401	Essential hypertension	0.85378	0.85378	-0.158082
202	Other malignant neoplasms of lymphoid and histiocytic tissue	425	Cardiomyopathy	1.39629	1.39629	0.333822
202	Other malignant neoplasms of lymphoid and histiocytic tissue	492	Emphysema	1.0095	1	0
202	Other malignant neoplasms of lymphoid and histiocytic tissue	515	Postinflammatory pulmonary fibrosis	1.68636	1.68636	0.522574
202	Other malignant neoplasms of lymphoid and histiocytic tissue	516	Other alveolar and parietoalveolar pneumonopathy	2.93927	2.93927	1.07816
202	Other malignant neoplasms of lymphoid and histiocytic tissue	523	Gingival and periodontal diseases	2.70203	2.70203	0.994002
202	Other malignant neoplasms of lymphoid and histiocytic tissue	528	Diseases of the oral soft tissues, excluding lesions specific for gingiva and tongue	10.236	10.236	2.32591
202	Other malignant neoplasms of lymphoid and histiocytic tissue	555	Regional enteritis	0.914144	1	0
202	Other malignant neoplasms of lymphoid and histiocytic tissue	569	Other disorders of intestine	1.52974	1.52974	0.425098
202	Other malignant neoplasms of lymphoid and histiocytic tissue	587	Renal sclerosis, unspecified	1.54765	1	0
202	Other malignant neoplasms of lymphoid and histiocytic tissue	695	Erythematous conditions	2.99501	2.99501	1.09695
202	Other malignant neoplasms of lymphoid and histiocytic tissue	706	Diseases of sebaceous glands	1.31213	1	0
202	Other malignant neoplasms of lymphoid and histiocytic tissue	709	Other disorders of skin and subcutaneous tissue	2.29959	2.29959	0.832733
202	Other malignant neoplasms of lymphoid and histiocytic tissue	714	Rheumatoid arthritis and other inflammatory polyarthropathies	1.09006	1	0
202	Other malignant neoplasms of lymphoid and histiocytic tissue	720	Ankylosing spondylitis and other inflammatory spondylopathies	0.988199	1	0
202	Other malignant neoplasms of lymphoid and histiocytic tissue	728	Disorders of muscle, ligament, and fascia	1.09061	1	0
202	Other malignant neoplasms of lymphoid and histiocytic tissue	733	Other disorders of bone and cartilage	1.62761	1.62761	0.487112
202	Other malignant neoplasms of lymphoid and histiocytic tissue	743	Congenital anomalies of eye	1.52625	1	0
202	Other malignant neoplasms of lymphoid and histiocytic tissue	744	Congenital anomalies of ear, face, and neck	1.39162	1	0
202	Other malignant neoplasms of lymphoid and histiocytic tissue	755	Other congenital anomalies of limbs	0.301173	0.301173	-1.20007
202	Other malignant neoplasms of lymphoid and histiocytic tissue	756	Other congenital musculoskeletal anomalies	0.746281	1	0
202	Other malignant neoplasms of lymphoid and histiocytic tissue	757	Congenital anomalies of the integument	4.71877	4.71877	1.55155
202	Other malignant neoplasms of lymphoid and histiocytic tissue	758	Chromosomal anomalies	0.940989	1	0
202	Other malignant neoplasms of lymphoid and histiocytic tissue	759	Other and unspecified congenital anomalies	2.58144	2.58144	0.948348
202	Other malignant neoplasms of lymphoid and histiocytic tissue	781	Symptoms involving nervous and musculoskeletal systems	1.08783	1	0
202	Other malignant neoplasms of lymphoid and histiocytic tissue	995	Certain adverse effects not elsewhere classified	1.20906	1.20906	0.189844
211	Benign neoplasm of other parts of digestive system	094	Neurosyphilis	1.33862	1.33862	0.29164
211	Benign neoplasm of other parts of digestive system	153	Malignant neoplasm of colon	6.79373	6.79373	1.916
211	Benign neoplasm of other parts of digestive system	157	Malignant neoplasm of pancreas	1.84583	1.84583	0.612931
211	Benign neoplasm of other parts of digestive system	161	Malignant neoplasm of larynx	0.77637	0.77637	-0.253126
211	Benign neoplasm of other parts of digestive system	170	Malignant neoplasm of bone and articular cartilage	0.776468	1	0
211	Benign neoplasm of other parts of digestive system	171	Malignant neoplasm of connective and other soft tissue	1.13887	1	0
211	Benign neoplasm of other parts of digestive system	172	Malignant melanoma of skin	0.763576	0.763576	-0.269743
211	Benign neoplasm of other parts of digestive system	173	Other malignant neoplasm of skin	1.2923	1.2923	0.256424
211	Benign neoplasm of other parts of digestive system	176	Kaposi's sarcoma	1.99015	1.99015	0.688211
211	Benign neoplasm of other parts of digestive system	183	Malignant neoplasm of ovary and other uterine adnexa	1.00672	1	0
211	Benign neoplasm of other parts of digestive system	185	Malignant neoplasm of prostate	0.911135	0.911135	-0.0930641
211	Benign neoplasm of other parts of digestive system	186	Malignant neoplasm of testis	0.944192	1	0
211	Benign neoplasm of other parts of digestive system	188	Malignant neoplasm of bladder	0.931465	0.931465	-0.0709963
211	Benign neoplasm of other parts of digestive system	190	Malignant neoplasm of eye	0.879682	1	0
211	Benign neoplasm of other parts of digestive system	191	Malignant neoplasm of brain	0.752202	0.752202	-0.284751
211	Benign neoplasm of other parts of digestive system	193	Malignant neoplasm of thyroid gland	0.663351	0.663351	-0.410451
211	Benign neoplasm of other parts of digestive system	194	Malignant neoplasm of other endocrine glands and related structures	1.55346	1.55346	0.440484
211	Benign neoplasm of other parts of digestive system	203	Multiple myeloma and immunoproliferative neoplasms	1.4067	1.4067	0.341249
211	Benign neoplasm of other parts of digestive system	204	Lymphoid leukemia	0.95817	1	0
211	Benign neoplasm of other parts of digestive system	207	Other specified leukemia	1.53489	1	0
211	Benign neoplasm of other parts of digestive system	208	Leukemia of unspecified cell type	1.27582	1.27582	0.243593
211	Benign neoplasm of other parts of digestive system	216	Benign neoplasm of skin	1.60806	1.60806	0.47503
211	Benign neoplasm of other parts of digestive system	217	Benign neoplasm of breast	1.46481	1.46481	0.381722
211	Benign neoplasm of other parts of digestive system	231	Carcinoma in situ of respiratory system	1.07278	1	0
211	Benign neoplasm of other parts of digestive system	237	Neoplasm of uncertain behavior of endocrine glands and nervous system	1.37894	1.37894	0.321314
211	Benign neoplasm of other parts of digestive system	238	Neoplasm of uncertain behavior of other and unspecified sites and tissues	1.75468	1.75468	0.562284
211	Benign neoplasm of other parts of digestive system	239	Neoplasms of unspecified nature	2.27998	2.27998	0.824165
211	Benign neoplasm of other parts of digestive system	244	Acquired hypothyroidism	1.08059	1.08059	0.0775083
211	Benign neoplasm of other parts of digestive system	250	Diabetes mellitus	1.08103	1.08103	0.0779108
211	Benign neoplasm of other parts of digestive system	251	Other disorders of pancreatic internal secretion	1.49787	1.49787	0.404043
211	Benign neoplasm of other parts of digestive system	255	Disorders of adrenal glands	1.73105	1.73105	0.548727
211	Benign neoplasm of other parts of digestive system	259	Other endocrine disorders	1.46665	1.46665	0.382979
211	Benign neoplasm of other parts of digestive system	260	Kwashiorkor	1.81776	1.81776	0.597603
211	Benign neoplasm of other parts of digestive system	268	Vitamin D deficiency	1.77674	1.77674	0.574778
211	Benign neoplasm of other parts of digestive system	270	Disorders of amino-acid transport and metabolism	1.66236	1.66236	0.508239
211	Benign neoplasm of other parts of digestive system	271	Disorders of carbohydrate transport and metabolism	1.39585	1.39585	0.333507
211	Benign neoplasm of other parts of digestive system	272	Disorders of lipoid metabolism	0.897446	0.897446	-0.108203
211	Benign neoplasm of other parts of digestive system	275	Disorders of mineral metabolism	1.42019	1.42019	0.350793
211	Benign neoplasm of other parts of digestive system	276	Disorders of fluid, electrolyte, and acid-base balance	1.3488	1.3488	0.299215
211	Benign neoplasm of other parts of digestive system	277	Other and unspecified disorders of metabolism	1.59672	1.59672	0.46795
211	Benign neoplasm of other parts of digestive system	279	Disorders involving the immune mechanism	1.42807	1.42807	0.356325
211	Benign neoplasm of other parts of digestive system	281	Other deficiency anemias	1.8048	1.8048	0.590449
211	Benign neoplasm of other parts of digestive system	282	Hereditary hemolytic anemias	1.92373	1.92373	0.654264
211	Benign neoplasm of other parts of digestive system	283	Acquired hemolytic anemias	2.06821	2.06821	0.726681
211	Benign neoplasm of other parts of digestive system	284	Aplastic anemia and other bone marrow failure syndromes	1.81315	1.81315	0.595068
211	Benign neoplasm of other parts of digestive system	285	Other and unspecified anemias	1.91946	1.91946	0.652046
211	Benign neoplasm of other parts of digestive system	286	Coagulation defects	1.94002	1.94002	0.662698
211	Benign neoplasm of other parts of digestive system	287	Purpura and other hemorrhagic conditions	1.63776	1.63776	0.493331
211	Benign neoplasm of other parts of digestive system	288	Diseases of white blood cells	1.45533	1.45533	0.375233
211	Benign neoplasm of other parts of digestive system	289	Other diseases of blood and blood-forming organs	1.79869	1.79869	0.587061
211	Benign neoplasm of other parts of digestive system	330	Cerebral degenerations usually manifest in childhood	1.23644	1	0
211	Benign neoplasm of other parts of digestive system	331	Other cerebral degenerations	0.873969	0.873969	-0.13471
211	Benign neoplasm of other parts of digestive system	332	Parkinson's disease	0.931925	0.931925	-0.0705032
211	Benign neoplasm of other parts of digestive system	333	Other extrapyramidal disease and abnormal movement disorders	1.18389	1.18389	0.168806
211	Benign neoplasm of other parts of digestive system	334	Spinocerebellar disease	1.42133	1.42133	0.351591
211	Benign neoplasm of other parts of digestive system	335	Anterior horn cell disease	0.929553	1	0
211	Benign neoplasm of other parts of digestive system	355	Mononeuritis of lower limb	1.36881	1.36881	0.31394
211	Benign neoplasm of other parts of digestive system	356	Hereditary and idiopathic peripheral neuropathy	1.40039	1.40039	0.336748
211	Benign neoplasm of other parts of digestive system	362	Other retinal disorders	1.07515	1.07515	0.0724572
211	Benign neoplasm of other parts of digestive system	365	Glaucoma	1.10186	1.10186	0.0970024
211	Benign neoplasm of other parts of digestive system	366	Cataract	1.1054	1.1054	0.10021
211	Benign neoplasm of other parts of digestive system	370	Keratitis	0.866701	1	0
211	Benign neoplasm of other parts of digestive system	371	Corneal opacity and other disorders of cornea	0.742465	0.742465	-0.29778
211	Benign neoplasm of other parts of digestive system	374	Other disorders of eyelids	1.01686	1	0
211	Benign neoplasm of other parts of digestive system	377	Disorders of optic nerve and visual pathways	1.03757	1	0
211	Benign neoplasm of other parts of digestive system	401	Essential hypertension	1.0885	1.0885	0.0847963
211	Benign neoplasm of other parts of digestive system	425	Cardiomyopathy	1.24907	1.24907	0.222399
211	Benign neoplasm of other parts of digestive system	492	Emphysema	1.47868	1.47868	0.391148
211	Benign neoplasm of other parts of digestive system	515	Postinflammatory pulmonary fibrosis	1.22327	1.22327	0.201525
211	Benign neoplasm of other parts of digestive system	516	Other alveolar and parietoalveolar pneumonopathy	1.15215	1.15215	0.141628
211	Benign neoplasm of other parts of digestive system	523	Gingival and periodontal diseases	1.3028	1.3028	0.264518
211	Benign neoplasm of other parts of digestive system	528	Diseases of the oral soft tissues, excluding lesions specific for gingiva and tongue	1.30478	1.30478	0.266034
211	Benign neoplasm of other parts of digestive system	555	Regional enteritis	2.78181	2.78181	1.0231
211	Benign neoplasm of other parts of digestive system	569	Other disorders of intestine	6.4149	6.4149	1.85862
211	Benign neoplasm of other parts of digestive system	587	Renal sclerosis, unspecified	1.67087	1.67087	0.513343
211	Benign neoplasm of other parts of digestive system	695	Erythematous conditions	1.32035	1.32035	0.277894
211	Benign neoplasm of other parts of digestive system	706	Diseases of sebaceous glands	1.72994	1.72994	0.548084
211	Benign neoplasm of other parts of digestive system	709	Other disorders of skin and subcutaneous tissue	1.40794	1.40794	0.342131
211	Benign neoplasm of other parts of digestive system	714	Rheumatoid arthritis and other inflammatory polyarthropathies	1.06789	1.06789	0.0656817
211	Benign neoplasm of other parts of digestive system	720	Ankylosing spondylitis and other inflammatory spondylopathies	1.13253	1	0
211	Benign neoplasm of other parts of digestive system	728	Disorders of muscle, ligament, and fascia	1.17002	1.17002	0.157018
211	Benign neoplasm of other parts of digestive system	733	Other disorders of bone and cartilage	1.05764	1.05764	0.056037
211	Benign neoplasm of other parts of digestive system	743	Congenital anomalies of eye	0.833769	1	0
211	Benign neoplasm of other parts of digestive system	744	Congenital anomalies of ear, face, and neck	0.863889	1	0
211	Benign neoplasm of other parts of digestive system	755	Other congenital anomalies of limbs	0.628192	0.628192	-0.464909
211	Benign neoplasm of other parts of digestive system	756	Other congenital musculoskeletal anomalies	0.88537	1	0
211	Benign neoplasm of other parts of digestive system	757	Congenital anomalies of the integument	1.49872	1.49872	0.404609
211	Benign neoplasm of other parts of digestive system	758	Chromosomal anomalies	0.993048	1	0
211	Benign neoplasm of other parts of digestive system	759	Other and unspecified congenital anomalies	1.82246	1.82246	0.600185
211	Benign neoplasm of other parts of digestive system	781	Symptoms involving nervous and musculoskeletal systems	1.10317	1.10317	0.0981918
211	Benign neoplasm of other parts of digestive system	995	Certain adverse effects not elsewhere classified	1.29854	1.29854	0.261244
217	Benign neoplasm of breast	094	Neurosyphilis	1.59723	1	0
217	Benign neoplasm of breast	147	Malignant neoplasm of nasopharynx		1	0
217	Benign neoplasm of breast	153	Malignant neoplasm of colon	0.865516	1	0
217	Benign neoplasm of breast	157	Malignant neoplasm of pancreas	0.900657	1	0
217	Benign neoplasm of breast	161	Malignant neoplasm of larynx	0.313932	1	0
217	Benign neoplasm of breast	170	Malignant neoplasm of bone and articular cartilage	2.8667	2.8667	1.05316
217	Benign neoplasm of breast	171	Malignant neoplasm of connective and other soft tissue	2.94291	2.94291	1.0794
217	Benign neoplasm of breast	172	Malignant melanoma of skin	1.76123	1	0
217	Benign neoplasm of breast	173	Other malignant neoplasm of skin	1.25614	1	0
217	Benign neoplasm of breast	176	Kaposi's sarcoma		1	0
217	Benign neoplasm of breast	183	Malignant neoplasm of ovary and other uterine adnexa	2.42343	2.42343	0.885186
217	Benign neoplasm of breast	185	Malignant neoplasm of prostate	0.0379882	0.0379882	-3.27048
217	Benign neoplasm of breast	186	Malignant neoplasm of testis		1	0
217	Benign neoplasm of breast	188	Malignant neoplasm of bladder	0.432324	0.432324	-0.83858
217	Benign neoplasm of breast	190	Malignant neoplasm of eye		1	0
217	Benign neoplasm of breast	191	Malignant neoplasm of brain	1.53024	1	0
217	Benign neoplasm of breast	193	Malignant neoplasm of thyroid gland	2.01174	1	0
217	Benign neoplasm of breast	194	Malignant neoplasm of other endocrine glands and related structures	3.85458	1	0
217	Benign neoplasm of breast	203	Multiple myeloma and immunoproliferative neoplasms	0.981579	1	0
217	Benign neoplasm of breast	204	Lymphoid leukemia	0.745084	1	0
217	Benign neoplasm of breast	207	Other specified leukemia		1	0
217	Benign neoplasm of breast	208	Leukemia of unspecified cell type	1.41555	1	0
217	Benign neoplasm of breast	216	Benign neoplasm of skin	6.60721	6.60721	1.88816
217	Benign neoplasm of breast	237	Neoplasm of uncertain behavior of endocrine glands and nervous system	1.9959	1	0
217	Benign neoplasm of breast	238	Neoplasm of uncertain behavior of other and unspecified sites and tissues	1.97938	1.97938	0.682785
217	Benign neoplasm of breast	239	Neoplasms of unspecified nature	1.65474	1.65474	0.503644
217	Benign neoplasm of breast	244	Acquired hypothyroidism	1.30879	1.30879	0.269103
217	Benign neoplasm of breast	250	Diabetes mellitus	1.08482	1.08482	0.0814112
217	Benign neoplasm of breast	251	Other disorders of pancreatic internal secretion	1.15394	1	0
217	Benign neoplasm of breast	255	Disorders of adrenal glands	0.822246	1	0
217	Benign neoplasm of breast	259	Other endocrine disorders	1.21306	1	0
217	Benign neoplasm of breast	260	Kwashiorkor	0.396121	1	0
217	Benign neoplasm of breast	268	Vitamin D deficiency	1.13438	1	0
217	Benign neoplasm of breast	270	Disorders of amino-acid transport and metabolism	2.1227	1	0
217	Benign neoplasm of breast	271	Disorders of carbohydrate transport and metabolism	0.833735	1	0
217	Benign neoplasm of breast	272	Disorders of lipoid metabolism	1.02483	1	0
217	Benign neoplasm of breast	275	Disorders of mineral metabolism	1.28662	1	0
217	Benign neoplasm of breast	276	Disorders of fluid, electrolyte, and acid-base balance	0.833121	0.833121	-0.182576
217	Benign neoplasm of breast	277	Other and unspecified disorders of metabolism	2.36372	2.36372	0.860237
217	Benign neoplasm of breast	279	Disorders involving the immune mechanism	0.79955	1	0
217	Benign neoplasm of breast	281	Other deficiency anemias	0.893186	1	0
217	Benign neoplasm of breast	282	Hereditary hemolytic anemias	1.05364	1	0
217	Benign neoplasm of breast	283	Acquired hemolytic anemias	1.74228	1	0
217	Benign neoplasm of breast	284	Aplastic anemia and other bone marrow failure syndromes	1.11377	1	0
217	Benign neoplasm of breast	285	Other and unspecified anemias	0.928593	1	0
217	Benign neoplasm of breast	286	Coagulation defects	1.24892	1	0
217	Benign neoplasm of breast	287	Purpura and other hemorrhagic conditions	1.04166	1	0
217	Benign neoplasm of breast	288	Diseases of white blood cells	1.38122	1.38122	0.322969
217	Benign neoplasm of breast	289	Other diseases of blood and blood-forming organs	1.52955	1.52955	0.424974
217	Benign neoplasm of breast	330	Cerebral degenerations usually manifest in childhood		1	0
217	Benign neoplasm of breast	331	Other cerebral degenerations	0.664247	0.664247	-0.409102
217	Benign neoplasm of breast	332	Parkinson's disease	0.804791	1	0
217	Benign neoplasm of breast	333	Other extrapyramidal disease and abnormal movement disorders	1.20367	1	0
217	Benign neoplasm of breast	334	Spinocerebellar disease	0.213741	1	0
217	Benign neoplasm of breast	335	Anterior horn cell disease	1.39294	1	0
217	Benign neoplasm of breast	355	Mononeuritis of lower limb	0.886144	1	0
217	Benign neoplasm of breast	356	Hereditary and idiopathic peripheral neuropathy	1.06766	1	0
217	Benign neoplasm of breast	362	Other retinal disorders	1.07628	1	0
217	Benign neoplasm of breast	365	Glaucoma	1.12982	1	0
217	Benign neoplasm of breast	366	Cataract	1.40205	1.40205	0.337937
217	Benign neoplasm of breast	370	Keratitis	0.618455	1	0
217	Benign neoplasm of breast	371	Corneal opacity and other disorders of cornea	0.719163	1	0
217	Benign neoplasm of breast	374	Other disorders of eyelids	0.664774	1	0
217	Benign neoplasm of breast	377	Disorders of optic nerve and visual pathways	1.1188	1	0
217	Benign neoplasm of breast	401	Essential hypertension	1.13258	1.13258	0.124496
217	Benign neoplasm of breast	425	Cardiomyopathy	0.687787	0.687787	-0.374276
217	Benign neoplasm of breast	492	Emphysema	0.740134	0.740134	-0.300925
217	Benign neoplasm of breast	515	Postinflammatory pulmonary fibrosis	0.844143	1	0
217	Benign neoplasm of breast	523	Gingival and periodontal diseases	1.89648	1	0
217	Benign neoplasm of breast	555	Regional enteritis	0.421467	1	0
217	Benign neoplasm of breast	569	Other disorders of intestine	0.922738	1	0
217	Benign neoplasm of breast	587	Renal sclerosis, unspecified	0.608066	1	0
217	Benign neoplasm of breast	695	Erythematous conditions	1.49897	1	0
217	Benign neoplasm of breast	706	Diseases of sebaceous glands	4.51704	4.51704	1.50786
217	Benign neoplasm of breast	709	Other disorders of skin and subcutaneous tissue	2.95409	2.95409	1.08319
217	Benign neoplasm of breast	714	Rheumatoid arthritis and other inflammatory polyarthropathies	0.898562	1	0
217	Benign neoplasm of breast	720	Ankylosing spondylitis and other inflammatory spondylopathies	1.37384	1	0
217	Benign neoplasm of breast	728	Disorders of muscle, ligament, and fascia	0.952867	1	0
217	Benign neoplasm of breast	733	Other disorders of bone and cartilage	1.20427	1.20427	0.185878
217	Benign neoplasm of breast	743	Congenital anomalies of eye		1	0
217	Benign neoplasm of breast	744	Congenital anomalies of ear, face, and neck		1	0
217	Benign neoplasm of breast	755	Other congenital anomalies of limbs		1	0
217	Benign neoplasm of breast	756	Other congenital musculoskeletal anomalies	1.49863	1	0
217	Benign neoplasm of breast	757	Congenital anomalies of the integument	4.95833	4.95833	1.60107
217	Benign neoplasm of breast	758	Chromosomal anomalies	2.12584	1	0
217	Benign neoplasm of breast	759	Other and unspecified congenital anomalies	2.28701	1	0
217	Benign neoplasm of breast	781	Symptoms involving nervous and musculoskeletal systems	1.10099	1	0
217	Benign neoplasm of breast	995	Certain adverse effects not elsewhere classified	1.03965	1	0
231	Carcinoma in situ of respiratory system	094	Neurosyphilis	1.40561	1	0
231	Carcinoma in situ of respiratory system	153	Malignant neoplasm of colon	1.19067	1	0
231	Carcinoma in situ of respiratory system	157	Malignant neoplasm of pancreas	0.792604	1	0
231	Carcinoma in situ of respiratory system	161	Malignant neoplasm of larynx	146.975	146.975	4.99026
231	Carcinoma in situ of respiratory system	170	Malignant neoplasm of bone and articular cartilage	11.5327	11.5327	2.44519
231	Carcinoma in situ of respiratory system	171	Malignant neoplasm of connective and other soft tissue	1.72656	1	0
231	Carcinoma in situ of respiratory system	172	Malignant melanoma of skin		1	0
231	Carcinoma in situ of respiratory system	173	Other malignant neoplasm of skin	2.47618	2.47618	0.906716
231	Carcinoma in situ of respiratory system	176	Kaposi's sarcoma	18.2106	18.2106	2.902
231	Carcinoma in situ of respiratory system	183	Malignant neoplasm of ovary and other uterine adnexa	1.25453	1	0
231	Carcinoma in situ of respiratory system	185	Malignant neoplasm of prostate	1.10799	1	0
231	Carcinoma in situ of respiratory system	186	Malignant neoplasm of testis	17.2794	17.2794	2.84951
231	Carcinoma in situ of respiratory system	188	Malignant neoplasm of bladder	1.79853	1.79853	0.586968
231	Carcinoma in situ of respiratory system	190	Malignant neoplasm of eye	5.00852	1	0
231	Carcinoma in situ of respiratory system	191	Malignant neoplasm of brain	10.7733	10.7733	2.37707
231	Carcinoma in situ of respiratory system	193	Malignant neoplasm of thyroid gland	3.54077	1	0
231	Carcinoma in situ of respiratory system	194	Malignant neoplasm of other endocrine glands and related structures		1	0
231	Carcinoma in situ of respiratory system	203	Multiple myeloma and immunoproliferative neoplasms	1.86053	1	0
231	Carcinoma in situ of respiratory system	204	Lymphoid leukemia	1.04911	1	0
231	Carcinoma in situ of respiratory system	207	Other specified leukemia		1	0
231	Carcinoma in situ of respiratory system	208	Leukemia of unspecified cell type	1.99316	1	0
231	Carcinoma in situ of respiratory system	216	Benign neoplasm of skin	3.32259	1	0
231	Carcinoma in situ of respiratory system	237	Neoplasm of uncertain behavior of endocrine glands and nervous system	2.00737	1	0
231	Carcinoma in situ of respiratory system	238	Neoplasm of uncertain behavior of other and unspecified sites and tissues	1.36324	1	0
231	Carcinoma in situ of respiratory system	239	Neoplasms of unspecified nature	11.2337	11.2337	2.41892
231	Carcinoma in situ of respiratory system	244	Acquired hypothyroidism	0.994959	1	0
231	Carcinoma in situ of respiratory system	250	Diabetes mellitus	0.820284	0.820284	-0.198105
231	Carcinoma in situ of respiratory system	251	Other disorders of pancreatic internal secretion	1.27317	1	0
231	Carcinoma in situ of respiratory system	255	Disorders of adrenal glands	2.00382	1	0
231	Carcinoma in situ of respiratory system	259	Other endocrine disorders	2.13505	1	0
231	Carcinoma in situ of respiratory system	260	Kwashiorkor	5.57757	5.57757	1.71875
231	Carcinoma in situ of respiratory system	268	Vitamin D deficiency		1	0
231	Carcinoma in situ of respiratory system	270	Disorders of amino-acid transport and metabolism		1	0
231	Carcinoma in situ of respiratory system	271	Disorders of carbohydrate transport and metabolism	1.25779	1	0
231	Carcinoma in situ of respiratory system	272	Disorders of lipoid metabolism	0.592282	0.592282	-0.523773
231	Carcinoma in situ of respiratory system	275	Disorders of mineral metabolism	2.72772	2.72772	1.00347
231	Carcinoma in situ of respiratory system	276	Disorders of fluid, electrolyte, and acid-base balance	1.57492	1.57492	0.454205
231	Carcinoma in situ of respiratory system	277	Other and unspecified disorders of metabolism	1.38676	1	0
231	Carcinoma in situ of respiratory system	279	Disorders involving the immune mechanism	0.93817	1	0
231	Carcinoma in situ of respiratory system	281	Other deficiency anemias	1.19565	1	0
231	Carcinoma in situ of respiratory system	282	Hereditary hemolytic anemias	0.82421	1	0
231	Carcinoma in situ of respiratory system	283	Acquired hemolytic anemias	3.27095	3.27095	1.18508
231	Carcinoma in situ of respiratory system	284	Aplastic anemia and other bone marrow failure syndromes	3.04936	3.04936	1.11493
231	Carcinoma in situ of respiratory system	285	Other and unspecified anemias	1.40568	1.40568	0.340518
231	Carcinoma in situ of respiratory system	286	Coagulation defects	0.999167	1	0
231	Carcinoma in situ of respiratory system	287	Purpura and other hemorrhagic conditions	1.73937	1.73937	0.553523
231	Carcinoma in situ of respiratory system	288	Diseases of white blood cells	3.05975	3.05975	1.11833
231	Carcinoma in situ of respiratory system	289	Other diseases of blood and blood-forming organs	1.75811	1	0
231	Carcinoma in situ of respiratory system	330	Cerebral degenerations usually manifest in childhood		1	0
231	Carcinoma in situ of respiratory system	331	Other cerebral degenerations	1.87975	1.87975	0.631139
231	Carcinoma in situ of respiratory system	332	Parkinson's disease	0.899881	1	0
231	Carcinoma in situ of respiratory system	333	Other extrapyramidal disease and abnormal movement disorders	1.49544	1	0
231	Carcinoma in situ of respiratory system	334	Spinocerebellar disease	2.25718	1	0
231	Carcinoma in situ of respiratory system	335	Anterior horn cell disease	1.40094	1	0
231	Carcinoma in situ of respiratory system	355	Mononeuritis of lower limb	2.00528	1	0
231	Carcinoma in situ of respiratory system	356	Hereditary and idiopathic peripheral neuropathy	2.00443	2.00443	0.695359
231	Carcinoma in situ of respiratory system	362	Other retinal disorders	0.349721	1	0
231	Carcinoma in situ of respiratory system	365	Glaucoma	0.814978	1	0
231	Carcinoma in situ of respiratory system	366	Cataract	0.911148	1	0
231	Carcinoma in situ of respiratory system	370	Keratitis	0.725678	1	0
231	Carcinoma in situ of respiratory system	371	Corneal opacity and other disorders of cornea	0.723296	1	0
231	Carcinoma in situ of respiratory system	374	Other disorders of eyelids	0.780027	1	0
231	Carcinoma in situ of respiratory system	377	Disorders of optic nerve and visual pathways	1.96916	1	0
231	Carcinoma in situ of respiratory system	401	Essential hypertension	0.972989	1	0
231	Carcinoma in situ of respiratory system	425	Cardiomyopathy	0.770347	1	0
231	Carcinoma in situ of respiratory system	492	Emphysema	3.86668	3.86668	1.3524
231	Carcinoma in situ of respiratory system	515	Postinflammatory pulmonary fibrosis	2.4241	2.4241	0.885462
231	Carcinoma in situ of respiratory system	523	Gingival and periodontal diseases	1.66896	1	0
231	Carcinoma in situ of respiratory system	555	Regional enteritis	0.890168	1	0
231	Carcinoma in situ of respiratory system	569	Other disorders of intestine	0.980572	1	0
231	Carcinoma in situ of respiratory system	587	Renal sclerosis, unspecified		1	0
231	Carcinoma in situ of respiratory system	695	Erythematous conditions	0.586284	1	0
231	Carcinoma in situ of respiratory system	706	Diseases of sebaceous glands	0.993782	1	0
231	Carcinoma in situ of respiratory system	709	Other disorders of skin and subcutaneous tissue	0.717156	1	0
231	Carcinoma in situ of respiratory system	714	Rheumatoid arthritis and other inflammatory polyarthropathies	1.10706	1	0
231	Carcinoma in situ of respiratory system	720	Ankylosing spondylitis and other inflammatory spondylopathies		1	0
231	Carcinoma in situ of respiratory system	728	Disorders of muscle, ligament, and fascia	2.20419	2.20419	0.790361
231	Carcinoma in situ of respiratory system	733	Other disorders of bone and cartilage	1.47671	1.47671	0.389819
231	Carcinoma in situ of respiratory system	743	Congenital anomalies of eye		1	0
231	Carcinoma in situ of respiratory system	744	Congenital anomalies of ear, face, and neck		1	0
231	Carcinoma in situ of respiratory system	755	Other congenital anomalies of limbs		1	0
231	Carcinoma in situ of respiratory system	756	Other congenital musculoskeletal anomalies	1.50725	1	0
231	Carcinoma in situ of respiratory system	757	Congenital anomalies of the integument	3.49078	1	0
231	Carcinoma in situ of respiratory system	758	Chromosomal anomalies		1	0
231	Carcinoma in situ of respiratory system	759	Other and unspecified congenital anomalies		1	0
231	Carcinoma in situ of respiratory system	781	Symptoms involving nervous and musculoskeletal systems	1.38415	1	0
231	Carcinoma in situ of respiratory system	995	Certain adverse effects not elsewhere classified	1.46388	1	0
238	Neoplasm of uncertain behavior of other and unspecified sites and tissues	094	Neurosyphilis	1.05657	1	0
238	Neoplasm of uncertain behavior of other and unspecified sites and tissues	153	Malignant neoplasm of colon	0.75621	0.75621	-0.279436
238	Neoplasm of uncertain behavior of other and unspecified sites and tissues	157	Malignant neoplasm of pancreas	0.830492	1	0
238	Neoplasm of uncertain behavior of other and unspecified sites and tissues	161	Malignant neoplasm of larynx	1.13273	1	0
238	Neoplasm of uncertain behavior of other and unspecified sites and tissues	170	Malignant neoplasm of bone and articular cartilage	3.89117	3.89117	1.35871
238	Neoplasm of uncertain behavior of other and unspecified sites and tissues	171	Malignant neoplasm of connective and other soft tissue	2.50717	2.50717	0.919155
238	Neoplasm of uncertain behavior of other and unspecified sites and tissues	172	Malignant melanoma of skin	1.41219	1.41219	0.345142
238	Neoplasm of uncertain behavior of other and unspecified sites and tissues	173	Other malignant neoplasm of skin	2.30245	2.30245	0.833976
238	Neoplasm of uncertain behavior of other and unspecified sites and tissues	176	Kaposi's sarcoma	2.79994	2.79994	1.0296
238	Neoplasm of uncertain behavior of other and unspecified sites and tissues	183	Malignant neoplasm of ovary and other uterine adnexa	1.26877	1.26877	0.238049
238	Neoplasm of uncertain behavior of other and unspecified sites and tissues	185	Malignant neoplasm of prostate	0.930111	0.930111	-0.0724515
238	Neoplasm of uncertain behavior of other and unspecified sites and tissues	186	Malignant neoplasm of testis	1.77118	1	0
238	Neoplasm of uncertain behavior of other and unspecified sites and tissues	188	Malignant neoplasm of bladder	1.16048	1.16048	0.148833
238	Neoplasm of uncertain behavior of other and unspecified sites and tissues	190	Malignant neoplasm of eye	1.28346	1	0
238	Neoplasm of uncertain behavior of other and unspecified sites and tissues	191	Malignant neoplasm of brain	1.14518	1	0
238	Neoplasm of uncertain behavior of other and unspecified sites and tissues	193	Malignant neoplasm of thyroid gland	1.24004	1	0
238	Neoplasm of uncertain behavior of other and unspecified sites and tissues	194	Malignant neoplasm of other endocrine glands and related structures	2.00895	1	0
238	Neoplasm of uncertain behavior of other and unspecified sites and tissues	203	Multiple myeloma and immunoproliferative neoplasms	8.17323	8.17323	2.10086
238	Neoplasm of uncertain behavior of other and unspecified sites and tissues	204	Lymphoid leukemia	5.36488	5.36488	1.67987
238	Neoplasm of uncertain behavior of other and unspecified sites and tissues	207	Other specified leukemia	41.6532	41.6532	3.72938
238	Neoplasm of uncertain behavior of other and unspecified sites and tissues	208	Leukemia of unspecified cell type	47.1602	47.1602	3.85355
238	Neoplasm of uncertain behavior of other and unspecified sites and tissues	216	Benign neoplasm of skin	1.41906	1	0
238	Neoplasm of uncertain behavior of other and unspecified sites and tissues	237	Neoplasm of uncertain behavior of endocrine glands and nervous system	3.80657	3.80657	1.33673
238	Neoplasm of uncertain behavior of other and unspecified sites and tissues	239	Neoplasms of unspecified nature	2.40247	2.40247	0.876498
238	Neoplasm of uncertain behavior of other and unspecified sites and tissues	244	Acquired hypothyroidism	1.35796	1.35796	0.305984
238	Neoplasm of uncertain behavior of other and unspecified sites and tissues	250	Diabetes mellitus	0.987146	1	0
238	Neoplasm of uncertain behavior of other and unspecified sites and tissues	251	Other disorders of pancreatic internal secretion	1.48317	1.48317	0.394182
238	Neoplasm of uncertain behavior of other and unspecified sites and tissues	255	Disorders of adrenal glands	2.3126	2.3126	0.838374
238	Neoplasm of uncertain behavior of other and unspecified sites and tissues	259	Other endocrine disorders	2.84502	2.84502	1.04557
238	Neoplasm of uncertain behavior of other and unspecified sites and tissues	260	Kwashiorkor	1.90571	1.90571	0.644856
238	Neoplasm of uncertain behavior of other and unspecified sites and tissues	268	Vitamin D deficiency	3.13801	3.13801	1.14359
238	Neoplasm of uncertain behavior of other and unspecified sites and tissues	270	Disorders of amino-acid transport and metabolism	3.06366	3.06366	1.11961
238	Neoplasm of uncertain behavior of other and unspecified sites and tissues	271	Disorders of carbohydrate transport and metabolism	1.52563	1.52563	0.422407
238	Neoplasm of uncertain behavior of other and unspecified sites and tissues	272	Disorders of lipoid metabolism	0.527627	0.527627	-0.639366
238	Neoplasm of uncertain behavior of other and unspecified sites and tissues	275	Disorders of mineral metabolism	2.18403	2.18403	0.78117
238	Neoplasm of uncertain behavior of other and unspecified sites and tissues	276	Disorders of fluid, electrolyte, and acid-base balance	1.48322	1.48322	0.394218
238	Neoplasm of uncertain behavior of other and unspecified sites and tissues	277	Other and unspecified disorders of metabolism	2.67709	2.67709	0.98473
238	Neoplasm of uncertain behavior of other and unspecified sites and tissues	279	Disorders involving the immune mechanism	6.21864	6.21864	1.82755
238	Neoplasm of uncertain behavior of other and unspecified sites and tissues	281	Other deficiency anemias	4.4408	4.4408	1.49083
238	Neoplasm of uncertain behavior of other and unspecified sites and tissues	282	Hereditary hemolytic anemias	5.11125	5.11125	1.63144
238	Neoplasm of uncertain behavior of other and unspecified sites and tissues	283	Acquired hemolytic anemias	9.27609	9.27609	2.22744
238	Neoplasm of uncertain behavior of other and unspecified sites and tissues	284	Aplastic anemia and other bone marrow failure syndromes	23.5764	23.5764	3.16025
238	Neoplasm of uncertain behavior of other and unspecified sites and tissues	285	Other and unspecified anemias	2.19685	2.19685	0.787025
238	Neoplasm of uncertain behavior of other and unspecified sites and tissues	286	Coagulation defects	3.92143	3.92143	1.36646
238	Neoplasm of uncertain behavior of other and unspecified sites and tissues	287	Purpura and other hemorrhagic conditions	12.7967	12.7967	2.54919
238	Neoplasm of uncertain behavior of other and unspecified sites and tissues	288	Diseases of white blood cells	8.78597	8.78597	2.17316
238	Neoplasm of uncertain behavior of other and unspecified sites and tissues	289	Other diseases of blood and blood-forming organs	30.6432	30.6432	3.42241
238	Neoplasm of uncertain behavior of other and unspecified sites and tissues	330	Cerebral degenerations usually manifest in childhood	2.25497	1	0
238	Neoplasm of uncertain behavior of other and unspecified sites and tissues	331	Other cerebral degenerations	0.907783	0.907783	-0.0967498
238	Neoplasm of uncertain behavior of other and unspecified sites and tissues	332	Parkinson's disease	0.982753	1	0
238	Neoplasm of uncertain behavior of other and unspecified sites and tissues	333	Other extrapyramidal disease and abnormal movement disorders	1.24332	1.24332	0.217783
238	Neoplasm of uncertain behavior of other and unspecified sites and tissues	334	Spinocerebellar disease	1.4139	1	0
238	Neoplasm of uncertain behavior of other and unspecified sites and tissues	335	Anterior horn cell disease	1.0052	1	0
238	Neoplasm of uncertain behavior of other and unspecified sites and tissues	355	Mononeuritis of lower limb	1.69005	1.69005	0.524756
238	Neoplasm of uncertain behavior of other and unspecified sites and tissues	356	Hereditary and idiopathic peripheral neuropathy	1.95614	1.95614	0.670972
238	Neoplasm of uncertain behavior of other and unspecified sites and tissues	362	Other retinal disorders	1.0316	1	0
238	Neoplasm of uncertain behavior of other and unspecified sites and tissues	365	Glaucoma	1.13165	1.13165	0.123676
238	Neoplasm of uncertain behavior of other and unspecified sites and tissues	366	Cataract	1.30493	1.30493	0.266152
238	Neoplasm of uncertain behavior of other and unspecified sites and tissues	370	Keratitis	1.26452	1	0
238	Neoplasm of uncertain behavior of other and unspecified sites and tissues	371	Corneal opacity and other disorders of cornea	0.753752	1	0
238	Neoplasm of uncertain behavior of other and unspecified sites and tissues	374	Other disorders of eyelids	1.59909	1.59909	0.469436
238	Neoplasm of uncertain behavior of other and unspecified sites and tissues	377	Disorders of optic nerve and visual pathways	1.54747	1.54747	0.436619
238	Neoplasm of uncertain behavior of other and unspecified sites and tissues	401	Essential hypertension	1.01645	1	0
238	Neoplasm of uncertain behavior of other and unspecified sites and tissues	425	Cardiomyopathy	1.57097	1.57097	0.451696
238	Neoplasm of uncertain behavior of other and unspecified sites and tissues	492	Emphysema	1.65178	1.65178	0.501856
238	Neoplasm of uncertain behavior of other and unspecified sites and tissues	515	Postinflammatory pulmonary fibrosis	1.98514	1.98514	0.685688
238	Neoplasm of uncertain behavior of other and unspecified sites and tissues	516	Other alveolar and parietoalveolar pneumonopathy	2.63658	2.63658	0.969481
238	Neoplasm of uncertain behavior of other and unspecified sites and tissues	523	Gingival and periodontal diseases	3.93465	3.93465	1.36982
238	Neoplasm of uncertain behavior of other and unspecified sites and tissues	528	Diseases of the oral soft tissues, excluding lesions specific for gingiva and tongue	3.59796	3.59796	1.28037
238	Neoplasm of uncertain behavior of other and unspecified sites and tissues	555	Regional enteritis	1.19631	1	0
238	Neoplasm of uncertain behavior of other and unspecified sites and tissues	569	Other disorders of intestine	1.89505	1.89505	0.639245
238	Neoplasm of uncertain behavior of other and unspecified sites and tissues	587	Renal sclerosis, unspecified	1.60895	1	0
238	Neoplasm of uncertain behavior of other and unspecified sites and tissues	695	Erythematous conditions	2.52401	2.52401	0.925848
238	Neoplasm of uncertain behavior of other and unspecified sites and tissues	706	Diseases of sebaceous glands	1.93543	1.93543	0.660331
238	Neoplasm of uncertain behavior of other and unspecified sites and tissues	709	Other disorders of skin and subcutaneous tissue	2.00928	2.00928	0.697774
238	Neoplasm of uncertain behavior of other and unspecified sites and tissues	714	Rheumatoid arthritis and other inflammatory polyarthropathies	1.2577	1.2577	0.229285
238	Neoplasm of uncertain behavior of other and unspecified sites and tissues	720	Ankylosing spondylitis and other inflammatory spondylopathies	1.65237	1.65237	0.502208
238	Neoplasm of uncertain behavior of other and unspecified sites and tissues	728	Disorders of muscle, ligament, and fascia	1.69287	1.69287	0.526427
238	Neoplasm of uncertain behavior of other and unspecified sites and tissues	733	Other disorders of bone and cartilage	1.92905	1.92905	0.65703
238	Neoplasm of uncertain behavior of other and unspecified sites and tissues	743	Congenital anomalies of eye	3.64942	3.64942	1.29457
238	Neoplasm of uncertain behavior of other and unspecified sites and tissues	744	Congenital anomalies of ear, face, and neck	1.13438	1	0
238	Neoplasm of uncertain behavior of other and unspecified sites and tissues	755	Other congenital anomalies of limbs	1.11294	1	0
238	Neoplasm of uncertain behavior of other and unspecified sites and tissues	756	Other congenital musculoskeletal anomalies	1.42909	1.42909	0.357038
238	Neoplasm of uncertain behavior of other and unspecified sites and tissues	757	Congenital anomalies of the integument	2.62396	2.62396	0.964686
238	Neoplasm of uncertain behavior of other and unspecified sites and tissues	758	Chromosomal anomalies	7.41476	7.41476	2.00347
238	Neoplasm of uncertain behavior of other and unspecified sites and tissues	759	Other and unspecified congenital anomalies	2.97071	2.97071	1.0888
238	Neoplasm of uncertain behavior of other and unspecified sites and tissues	781	Symptoms involving nervous and musculoskeletal systems	1.42825	1.42825	0.356448
238	Neoplasm of uncertain behavior of other and unspecified sites and tissues	995	Certain adverse effects not elsewhere classified	1.45049	1.45049	0.371904
239	Neoplasms of unspecified nature	094	Neurosyphilis	2.04474	2.04474	0.71527
239	Neoplasms of unspecified nature	153	Malignant neoplasm of colon	2.95142	2.95142	1.08229
239	Neoplasms of unspecified nature	157	Malignant neoplasm of pancreas	7.06679	7.06679	1.95541
239	Neoplasms of unspecified nature	161	Malignant neoplasm of larynx	4.97824	4.97824	1.60508
239	Neoplasms of unspecified nature	170	Malignant neoplasm of bone and articular cartilage	10.0795	10.0795	2.3105
239	Neoplasms of unspecified nature	171	Malignant neoplasm of connective and other soft tissue	6.27909	6.27909	1.83723
239	Neoplasms of unspecified nature	172	Malignant melanoma of skin	1.87487	1.87487	0.628537
239	Neoplasms of unspecified nature	173	Other malignant neoplasm of skin	3.14561	3.14561	1.14601
239	Neoplasms of unspecified nature	176	Kaposi's sarcoma	2.56365	1	0
239	Neoplasms of unspecified nature	183	Malignant neoplasm of ovary and other uterine adnexa	3.76766	3.76766	1.32645
239	Neoplasms of unspecified nature	185	Malignant neoplasm of prostate	1.83321	1.83321	0.606071
239	Neoplasms of unspecified nature	186	Malignant neoplasm of testis	3.2434	1	0
239	Neoplasms of unspecified nature	188	Malignant neoplasm of bladder	5.97274	5.97274	1.78721
239	Neoplasms of unspecified nature	190	Malignant neoplasm of eye	3.40792	3.40792	1.2261
239	Neoplasms of unspecified nature	191	Malignant neoplasm of brain	32.1582	32.1582	3.47067
239	Neoplasms of unspecified nature	193	Malignant neoplasm of thyroid gland	3.48923	3.48923	1.24968
239	Neoplasms of unspecified nature	194	Malignant neoplasm of other endocrine glands and related structures	25.4687	25.4687	3.23745
239	Neoplasms of unspecified nature	203	Multiple myeloma and immunoproliferative neoplasms	1.7212	1.7212	0.543019
239	Neoplasms of unspecified nature	204	Lymphoid leukemia	1.34564	1.34564	0.296867
239	Neoplasms of unspecified nature	207	Other specified leukemia	1.23026	1	0
239	Neoplasms of unspecified nature	208	Leukemia of unspecified cell type	1.82385	1.82385	0.600952
239	Neoplasms of unspecified nature	216	Benign neoplasm of skin	1.94895	1.94895	0.667288
239	Neoplasms of unspecified nature	237	Neoplasm of uncertain behavior of endocrine glands and nervous system	24.3501	24.3501	3.19254
239	Neoplasms of unspecified nature	244	Acquired hypothyroidism	1.30324	1.30324	0.264854
239	Neoplasms of unspecified nature	250	Diabetes mellitus	1.11841	1.11841	0.11191
239	Neoplasms of unspecified nature	251	Other disorders of pancreatic internal secretion	1.70414	1.70414	0.53306
239	Neoplasms of unspecified nature	255	Disorders of adrenal glands	4.92095	4.92095	1.5935
239	Neoplasms of unspecified nature	259	Other endocrine disorders	3.20606	3.20606	1.16504
239	Neoplasms of unspecified nature	260	Kwashiorkor	2.09386	2.09386	0.739009
239	Neoplasms of unspecified nature	268	Vitamin D deficiency	2.06119	1	0
239	Neoplasms of unspecified nature	270	Disorders of amino-acid transport and metabolism	2.98042	2.98042	1.09206
239	Neoplasms of unspecified nature	271	Disorders of carbohydrate transport and metabolism	1.69199	1.69199	0.525906
239	Neoplasms of unspecified nature	272	Disorders of lipoid metabolism	0.785793	0.785793	-0.241061
239	Neoplasms of unspecified nature	275	Disorders of mineral metabolism	1.98763	1.98763	0.686944
239	Neoplasms of unspecified nature	276	Disorders of fluid, electrolyte, and acid-base balance	1.57999	1.57999	0.457421
239	Neoplasms of unspecified nature	277	Other and unspecified disorders of metabolism	1.88718	1.88718	0.635082
239	Neoplasms of unspecified nature	279	Disorders involving the immune mechanism	1.89305	1.89305	0.638189
239	Neoplasms of unspecified nature	281	Other deficiency anemias	1.76425	1.76425	0.567727
239	Neoplasms of unspecified nature	282	Hereditary hemolytic anemias	1.21832	1	0
239	Neoplasms of unspecified nature	283	Acquired hemolytic anemias	1.18957	1	0
239	Neoplasms of unspecified nature	284	Aplastic anemia and other bone marrow failure syndromes	2.44077	2.44077	0.892315
239	Neoplasms of unspecified nature	285	Other and unspecified anemias	1.60038	1.60038	0.47024
239	Neoplasms of unspecified nature	286	Coagulation defects	1.71606	1.71606	0.540029
239	Neoplasms of unspecified nature	287	Purpura and other hemorrhagic conditions	1.75817	1.75817	0.564274
239	Neoplasms of unspecified nature	288	Diseases of white blood cells	2.15569	2.15569	0.768109
239	Neoplasms of unspecified nature	289	Other diseases of blood and blood-forming organs	1.89751	1.89751	0.640545
239	Neoplasms of unspecified nature	330	Cerebral degenerations usually manifest in childhood	3.7164	3.7164	1.31275
239	Neoplasms of unspecified nature	331	Other cerebral degenerations	2.01482	2.01482	0.70053
239	Neoplasms of unspecified nature	332	Parkinson's disease	1.43418	1.43418	0.360592
239	Neoplasms of unspecified nature	333	Other extrapyramidal disease and abnormal movement disorders	1.47952	1.47952	0.391715
239	Neoplasms of unspecified nature	334	Spinocerebellar disease	2.85984	2.85984	1.05077
239	Neoplasms of unspecified nature	335	Anterior horn cell disease	1.87361	1.87361	0.627865
239	Neoplasms of unspecified nature	355	Mononeuritis of lower limb	1.62061	1.62061	0.482801
239	Neoplasms of unspecified nature	356	Hereditary and idiopathic peripheral neuropathy	1.86943	1.86943	0.625636
239	Neoplasms of unspecified nature	362	Other retinal disorders	1.05304	1	0
239	Neoplasms of unspecified nature	365	Glaucoma	1.28651	1.28651	0.251935
239	Neoplasms of unspecified nature	366	Cataract	1.3112	1.3112	0.270941
239	Neoplasms of unspecified nature	370	Keratitis	1.29402	1	0
239	Neoplasms of unspecified nature	371	Corneal opacity and other disorders of cornea	0.560031	0.560031	-0.579762
239	Neoplasms of unspecified nature	374	Other disorders of eyelids	2.37923	2.37923	0.866775
239	Neoplasms of unspecified nature	377	Disorders of optic nerve and visual pathways	3.37277	3.37277	1.21573
239	Neoplasms of unspecified nature	401	Essential hypertension	1.12504	1.12504	0.117817
239	Neoplasms of unspecified nature	425	Cardiomyopathy	1.14438	1.14438	0.134863
239	Neoplasms of unspecified nature	492	Emphysema	1.89404	1.89404	0.638711
239	Neoplasms of unspecified nature	515	Postinflammatory pulmonary fibrosis	1.60539	1.60539	0.473365
239	Neoplasms of unspecified nature	516	Other alveolar and parietoalveolar pneumonopathy	1.56148	1.56148	0.445633
239	Neoplasms of unspecified nature	523	Gingival and periodontal diseases	1.40971	1	0
239	Neoplasms of unspecified nature	528	Diseases of the oral soft tissues, excluding lesions specific for gingiva and tongue	2.77663	2.77663	1.02124
239	Neoplasms of unspecified nature	555	Regional enteritis	1.11392	1	0
239	Neoplasms of unspecified nature	569	Other disorders of intestine	2.09365	2.09365	0.738907
239	Neoplasms of unspecified nature	587	Renal sclerosis, unspecified	4.01772	4.01772	1.39072
239	Neoplasms of unspecified nature	695	Erythematous conditions	1.36184	1.36184	0.308835
239	Neoplasms of unspecified nature	706	Diseases of sebaceous glands	1.84205	1.84205	0.610877
239	Neoplasms of unspecified nature	709	Other disorders of skin and subcutaneous tissue	1.59853	1.59853	0.469081
239	Neoplasms of unspecified nature	714	Rheumatoid arthritis and other inflammatory polyarthropathies	0.944377	1	0
239	Neoplasms of unspecified nature	720	Ankylosing spondylitis and other inflammatory spondylopathies	1.04959	1	0
239	Neoplasms of unspecified nature	728	Disorders of muscle, ligament, and fascia	2.04169	2.04169	0.713778
239	Neoplasms of unspecified nature	733	Other disorders of bone and cartilage	1.60397	1.60397	0.472479
239	Neoplasms of unspecified nature	743	Congenital anomalies of eye	0.45565	1	0
239	Neoplasms of unspecified nature	744	Congenital anomalies of ear, face, and neck	1.55796	1	0
239	Neoplasms of unspecified nature	755	Other congenital anomalies of limbs	0.899128	1	0
239	Neoplasms of unspecified nature	756	Other congenital musculoskeletal anomalies	1.34385	1.34385	0.295537
239	Neoplasms of unspecified nature	757	Congenital anomalies of the integument	1.31046	1	0
239	Neoplasms of unspecified nature	758	Chromosomal anomalies	0.702311	1	0
239	Neoplasms of unspecified nature	759	Other and unspecified congenital anomalies	3.24889	3.24889	1.17831
239	Neoplasms of unspecified nature	781	Symptoms involving nervous and musculoskeletal systems	2.10447	2.10447	0.744061
239	Neoplasms of unspecified nature	995	Certain adverse effects not elsewhere classified	1.79853	1.79853	0.586969
279	Disorders involving the immune mechanism	094	Neurosyphilis	2.08222	1	0
279	Disorders involving the immune mechanism	153	Malignant neoplasm of colon	1.05236	1	0
279	Disorders involving the immune mechanism	157	Malignant neoplasm of pancreas	0.615025	1	0
279	Disorders involving the immune mechanism	161	Malignant neoplasm of larynx	1.40316	1	0
279	Disorders involving the immune mechanism	170	Malignant neoplasm of bone and articular cartilage	3.35582	3.35582	1.21069
279	Disorders involving the immune mechanism	171	Malignant neoplasm of connective and other soft tissue	1.64422	1	0
279	Disorders involving the immune mechanism	172	Malignant melanoma of skin	0.583115	1	0
279	Disorders involving the immune mechanism	173	Other malignant neoplasm of skin	2.8821	2.8821	1.05852
279	Disorders involving the immune mechanism	176	Kaposi's sarcoma	13.4883	13.4883	2.60182
279	Disorders involving the immune mechanism	183	Malignant neoplasm of ovary and other uterine adnexa	2.177	2.177	0.777947
279	Disorders involving the immune mechanism	185	Malignant neoplasm of prostate	0.73173	0.73173	-0.312344
279	Disorders involving the immune mechanism	186	Malignant neoplasm of testis		1	0
279	Disorders involving the immune mechanism	188	Malignant neoplasm of bladder	1.02472	1	0
279	Disorders involving the immune mechanism	190	Malignant neoplasm of eye	1.05992	1	0
279	Disorders involving the immune mechanism	191	Malignant neoplasm of brain	2.27988	2.27988	0.824122
279	Disorders involving the immune mechanism	193	Malignant neoplasm of thyroid gland	1.49862	1	0
279	Disorders involving the immune mechanism	194	Malignant neoplasm of other endocrine glands and related structures	2.87144	1	0
279	Disorders involving the immune mechanism	203	Multiple myeloma and immunoproliferative neoplasms	18.7867	18.7867	2.93315
279	Disorders involving the immune mechanism	204	Lymphoid leukemia	42.9604	42.9604	3.76028
279	Disorders involving the immune mechanism	207	Other specified leukemia	19.4185	19.4185	2.96623
279	Disorders involving the immune mechanism	208	Leukemia of unspecified cell type	21.0901	21.0901	3.0488
279	Disorders involving the immune mechanism	216	Benign neoplasm of skin	0.878925	1	0
279	Disorders involving the immune mechanism	237	Neoplasm of uncertain behavior of endocrine glands and nervous system	1.27442	1	0
279	Disorders involving the immune mechanism	244	Acquired hypothyroidism	1.84237	1.84237	0.611055
279	Disorders involving the immune mechanism	250	Diabetes mellitus	1.02973	1	0
279	Disorders involving the immune mechanism	251	Other disorders of pancreatic internal secretion	2.97659	2.97659	1.09078
279	Disorders involving the immune mechanism	255	Disorders of adrenal glands	12.1091	12.1091	2.49396
279	Disorders involving the immune mechanism	259	Other endocrine disorders	1.80731	1	0
279	Disorders involving the immune mechanism	260	Kwashiorkor	3.54104	3.54104	1.26442
279	Disorders involving the immune mechanism	268	Vitamin D deficiency	7.60538	7.60538	2.02886
279	Disorders involving the immune mechanism	270	Disorders of amino-acid transport and metabolism	0.790644	1	0
279	Disorders involving the immune mechanism	271	Disorders of carbohydrate transport and metabolism	3.06105	3.06105	1.11876
279	Disorders involving the immune mechanism	272	Disorders of lipoid metabolism	0.93436	1	0
279	Disorders involving the immune mechanism	275	Disorders of mineral metabolism	2.9516	2.9516	1.08235
279	Disorders involving the immune mechanism	276	Disorders of fluid, electrolyte, and acid-base balance	1.78514	1.78514	0.579495
279	Disorders involving the immune mechanism	277	Other and unspecified disorders of metabolism	4.84229	4.84229	1.57739
279	Disorders involving the immune mechanism	281	Other deficiency anemias	3.00823	3.00823	1.10135
279	Disorders involving the immune mechanism	282	Hereditary hemolytic anemias	6.88969	6.88969	1.93003
279	Disorders involving the immune mechanism	283	Acquired hemolytic anemias	22.6699	22.6699	3.12104
279	Disorders involving the immune mechanism	284	Aplastic anemia and other bone marrow failure syndromes	15.1004	15.1004	2.71472
279	Disorders involving the immune mechanism	285	Other and unspecified anemias	2.09806	2.09806	0.741014
279	Disorders involving the immune mechanism	286	Coagulation defects	3.55232	3.55232	1.2676
279	Disorders involving the immune mechanism	287	Purpura and other hemorrhagic conditions	9.61019	9.61019	2.26282
279	Disorders involving the immune mechanism	288	Diseases of white blood cells	9.76595	9.76595	2.2789
279	Disorders involving the immune mechanism	289	Other diseases of blood and blood-forming organs	7.65042	7.65042	2.03476
279	Disorders involving the immune mechanism	330	Cerebral degenerations usually manifest in childhood	2.79333	1	0
279	Disorders involving the immune mechanism	331	Other cerebral degenerations	0.751939	0.751939	-0.2851
279	Disorders involving the immune mechanism	332	Parkinson's disease	0.895756	1	0
279	Disorders involving the immune mechanism	333	Other extrapyramidal disease and abnormal movement disorders	1.79333	1.79333	0.584075
279	Disorders involving the immune mechanism	334	Spinocerebellar disease	1.59224	1	0
279	Disorders involving the immune mechanism	335	Anterior horn cell disease	1.77884	1	0
279	Disorders involving the immune mechanism	355	Mononeuritis of lower limb	3.72499	3.72499	1.31506
279	Disorders involving the immune mechanism	356	Hereditary and idiopathic peripheral neuropathy	5.30231	5.30231	1.66814
279	Disorders involving the immune mechanism	362	Other retinal disorders	1.15948	1	0
279	Disorders involving the immune mechanism	365	Glaucoma	1.02101	1	0
279	Disorders involving the immune mechanism	366	Cataract	1.51043	1.51043	0.412394
279	Disorders involving the immune mechanism	370	Keratitis	4.29998	4.29998	1.45861
279	Disorders involving the immune mechanism	371	Corneal opacity and other disorders of cornea	1.98987	1.98987	0.688068
279	Disorders involving the immune mechanism	374	Other disorders of eyelids	2.14594	2.14594	0.763578
279	Disorders involving the immune mechanism	377	Disorders of optic nerve and visual pathways	3.54213	3.54213	1.26473
279	Disorders involving the immune mechanism	401	Essential hypertension	0.918453	0.918453	-0.085065
279	Disorders involving the immune mechanism	425	Cardiomyopathy	1.43461	1.43461	0.360892
279	Disorders involving the immune mechanism	492	Emphysema	2.05227	2.05227	0.718946
279	Disorders involving the immune mechanism	515	Postinflammatory pulmonary fibrosis	3.88058	3.88058	1.35599
279	Disorders involving the immune mechanism	516	Other alveolar and parietoalveolar pneumonopathy	7.81951	7.81951	2.05662
279	Disorders involving the immune mechanism	523	Gingival and periodontal diseases	2.82553	2.82553	1.03869
279	Disorders involving the immune mechanism	528	Diseases of the oral soft tissues, excluding lesions specific for gingiva and tongue	8.20646	8.20646	2.10492
279	Disorders involving the immune mechanism	555	Regional enteritis	2.76292	2.76292	1.01629
279	Disorders involving the immune mechanism	569	Other disorders of intestine	1.90004	1.90004	0.641873
279	Disorders involving the immune mechanism	587	Renal sclerosis, unspecified	1.35892	1	0
279	Disorders involving the immune mechanism	695	Erythematous conditions	6.94801	6.94801	1.93846
279	Disorders involving the immune mechanism	706	Diseases of sebaceous glands	2.94431	2.94431	1.07987
279	Disorders involving the immune mechanism	709	Other disorders of skin and subcutaneous tissue	2.42828	2.42828	0.887182
279	Disorders involving the immune mechanism	714	Rheumatoid arthritis and other inflammatory polyarthropathies	5.765	5.765	1.7518
279	Disorders involving the immune mechanism	720	Ankylosing spondylitis and other inflammatory spondylopathies	2.81443	2.81443	1.03476
279	Disorders involving the immune mechanism	728	Disorders of muscle, ligament, and fascia	1.98752	1.98752	0.686889
279	Disorders involving the immune mechanism	733	Other disorders of bone and cartilage	2.91225	2.91225	1.06893
279	Disorders involving the immune mechanism	743	Congenital anomalies of eye	2.05487	1	0
279	Disorders involving the immune mechanism	744	Congenital anomalies of ear, face, and neck		1	0
279	Disorders involving the immune mechanism	755	Other congenital anomalies of limbs	1.21645	1	0
279	Disorders involving the immune mechanism	756	Other congenital musculoskeletal anomalies	1.27588	1	0
279	Disorders involving the immune mechanism	757	Congenital anomalies of the integument	2.95493	1	0
279	Disorders involving the immune mechanism	758	Chromosomal anomalies		1	0
279	Disorders involving the immune mechanism	759	Other and unspecified congenital anomalies	2.7259	2.7259	1.0028
279	Disorders involving the immune mechanism	781	Symptoms involving nervous and musculoskeletal systems	1.43531	1.43531	0.361379
279	Disorders involving the immune mechanism	995	Certain adverse effects not elsewhere classified	2.33752	2.33752	0.849091
288	Diseases of white blood cells	094	Neurosyphilis	1.42198	1.42198	0.35205
288	Diseases of white blood cells	153	Malignant neoplasm of colon	1.71311	1.71311	0.538311
288	Diseases of white blood cells	157	Malignant neoplasm of pancreas	2.5379	2.5379	0.931338
288	Diseases of white blood cells	161	Malignant neoplasm of larynx	2.64338	2.64338	0.972057
288	Diseases of white blood cells	170	Malignant neoplasm of bone and articular cartilage	4.23884	4.23884	1.44429
288	Diseases of white blood cells	171	Malignant neoplasm of connective and other soft tissue	5.23187	5.23187	1.65477
288	Diseases of white blood cells	172	Malignant melanoma of skin	1.68033	1.68033	0.518992
288	Diseases of white blood cells	173	Other malignant neoplasm of skin	1.80602	1.80602	0.591128
288	Diseases of white blood cells	176	Kaposi's sarcoma	3.96003	3.96003	1.37625
288	Diseases of white blood cells	183	Malignant neoplasm of ovary and other uterine adnexa	8.22212	8.22212	2.10683
288	Diseases of white blood cells	185	Malignant neoplasm of prostate	0.853947	0.853947	-0.157886
288	Diseases of white blood cells	186	Malignant neoplasm of testis	5.5546	5.5546	1.71463
288	Diseases of white blood cells	188	Malignant neoplasm of bladder	1.75865	1.75865	0.564549
288	Diseases of white blood cells	190	Malignant neoplasm of eye	0.947076	1	0
288	Diseases of white blood cells	191	Malignant neoplasm of brain	2.3597	2.3597	0.858534
288	Diseases of white blood cells	193	Malignant neoplasm of thyroid gland	1.39766	1.39766	0.334797
288	Diseases of white blood cells	194	Malignant neoplasm of other endocrine glands and related structures	3.46373	3.46373	1.24235
288	Diseases of white blood cells	203	Multiple myeloma and immunoproliferative neoplasms	9.43364	9.43364	2.24428
288	Diseases of white blood cells	204	Lymphoid leukemia	7.4839	7.4839	2.01275
288	Diseases of white blood cells	207	Other specified leukemia	16.7314	16.7314	2.81729
288	Diseases of white blood cells	208	Leukemia of unspecified cell type	15.7447	15.7447	2.75651
288	Diseases of white blood cells	216	Benign neoplasm of skin	1.0131	1	0
288	Diseases of white blood cells	237	Neoplasm of uncertain behavior of endocrine glands and nervous system	1.97382	1.97382	0.679971
288	Diseases of white blood cells	244	Acquired hypothyroidism	1.36811	1.36811	0.313427
288	Diseases of white blood cells	250	Diabetes mellitus	1.03891	1.03891	0.0381697
288	Diseases of white blood cells	251	Other disorders of pancreatic internal secretion	1.99362	1.99362	0.68995
288	Diseases of white blood cells	255	Disorders of adrenal glands	3.09652	3.09652	1.13028
288	Diseases of white blood cells	259	Other endocrine disorders	1.99843	1.99843	0.692364
288	Diseases of white blood cells	260	Kwashiorkor	3.02562	3.02562	1.10711
288	Diseases of white blood cells	268	Vitamin D deficiency	2.22747	2.22747	0.800866
288	Diseases of white blood cells	270	Disorders of amino-acid transport and metabolism	3.21443	3.21443	1.16765
288	Diseases of white blood cells	271	Disorders of carbohydrate transport and metabolism	2.06128	2.06128	0.723326
288	Diseases of white blood cells	272	Disorders of lipoid metabolism	0.901673	0.901673	-0.103503
288	Diseases of white blood cells	275	Disorders of mineral metabolism	3.57503	3.57503	1.27397
288	Diseases of white blood cells	276	Disorders of fluid, electrolyte, and acid-base balance	1.97858	1.97858	0.68238
288	Diseases of white blood cells	277	Other and unspecified disorders of metabolism	2.49116	2.49116	0.912749
288	Diseases of white blood cells	281	Other deficiency anemias	2.74071	2.74071	1.00822
288	Diseases of white blood cells	282	Hereditary hemolytic anemias	2.83262	2.83262	1.0412
288	Diseases of white blood cells	283	Acquired hemolytic anemias	5.4584	5.4584	1.69716
288	Diseases of white blood cells	284	Aplastic anemia and other bone marrow failure syndromes	15.1756	15.1756	2.71969
288	Diseases of white blood cells	285	Other and unspecified anemias	2.16286	2.16286	0.771429
288	Diseases of white blood cells	286	Coagulation defects	2.43286	2.43286	0.889068
288	Diseases of white blood cells	287	Purpura and other hemorrhagic conditions	10.3627	10.3627	2.33821
288	Diseases of white blood cells	289	Other diseases of blood and blood-forming organs	7.1559	7.1559	1.96794
288	Diseases of white blood cells	330	Cerebral degenerations usually manifest in childhood	1.12317	1	0
288	Diseases of white blood cells	331	Other cerebral degenerations	1.26661	1.26661	0.236343
288	Diseases of white blood cells	332	Parkinson's disease	1.11046	1.11046	0.104775
288	Diseases of white blood cells	333	Other extrapyramidal disease and abnormal movement disorders	1.5482	1.5482	0.437096
288	Diseases of white blood cells	334	Spinocerebellar disease	1.59345	1.59345	0.465902
288	Diseases of white blood cells	335	Anterior horn cell disease	1.36428	1.36428	0.310628
288	Diseases of white blood cells	355	Mononeuritis of lower limb	1.95281	1.95281	0.669268
288	Diseases of white blood cells	356	Hereditary and idiopathic peripheral neuropathy	2.03962	2.03962	0.712765
288	Diseases of white blood cells	362	Other retinal disorders	0.942901	1	0
288	Diseases of white blood cells	365	Glaucoma	1.09447	1.09447	0.0902667
288	Diseases of white blood cells	366	Cataract	1.17661	1.17661	0.162638
288	Diseases of white blood cells	370	Keratitis	1.37221	1.37221	0.316421
288	Diseases of white blood cells	371	Corneal opacity and other disorders of cornea	0.789849	0.789849	-0.235914
288	Diseases of white blood cells	374	Other disorders of eyelids	1.43073	1.43073	0.358184
288	Diseases of white blood cells	377	Disorders of optic nerve and visual pathways	1.61974	1.61974	0.482268
288	Diseases of white blood cells	401	Essential hypertension	1.02551	1.02551	0.0251916
288	Diseases of white blood cells	425	Cardiomyopathy	1.33577	1.33577	0.289508
288	Diseases of white blood cells	492	Emphysema	1.73602	1.73602	0.551597
288	Diseases of white blood cells	515	Postinflammatory pulmonary fibrosis	2.01984	2.01984	0.703016
288	Diseases of white blood cells	516	Other alveolar and parietoalveolar pneumonopathy	2.75041	2.75041	1.01175
288	Diseases of white blood cells	523	Gingival and periodontal diseases	3.21111	3.21111	1.16662
288	Diseases of white blood cells	528	Diseases of the oral soft tissues, excluding lesions specific for gingiva and tongue	11.4637	11.4637	2.43919
288	Diseases of white blood cells	555	Regional enteritis	1.71411	1.71411	0.538892
288	Diseases of white blood cells	569	Other disorders of intestine	1.89534	1.89534	0.639396
288	Diseases of white blood cells	587	Renal sclerosis, unspecified	1.76065	1.76065	0.565683
288	Diseases of white blood cells	695	Erythematous conditions	3.04594	3.04594	1.11381
288	Diseases of white blood cells	706	Diseases of sebaceous glands	1.52213	1.52213	0.420111
288	Diseases of white blood cells	709	Other disorders of skin and subcutaneous tissue	2.10533	2.10533	0.744474
288	Diseases of white blood cells	714	Rheumatoid arthritis and other inflammatory polyarthropathies	2.02647	2.02647	0.706296
288	Diseases of white blood cells	720	Ankylosing spondylitis and other inflammatory spondylopathies	1.42886	1.42886	0.356877
288	Diseases of white blood cells	728	Disorders of muscle, ligament, and fascia	1.67897	1.67897	0.51818
288	Diseases of white blood cells	733	Other disorders of bone and cartilage	1.74836	1.74836	0.558677
288	Diseases of white blood cells	743	Congenital anomalies of eye	1.10166	1	0
288	Diseases of white blood cells	744	Congenital anomalies of ear, face, and neck	1.04633	1	0
288	Diseases of white blood cells	755	Other congenital anomalies of limbs	1.28621	1	0
288	Diseases of white blood cells	756	Other congenital musculoskeletal anomalies	1.22554	1.22554	0.203384
288	Diseases of white blood cells	757	Congenital anomalies of the integument	1.74922	1.74922	0.559171
288	Diseases of white blood cells	758	Chromosomal anomalies	2.12253	2.12253	0.75261
288	Diseases of white blood cells	759	Other and unspecified congenital anomalies	1.58319	1.58319	0.459444
288	Diseases of white blood cells	781	Symptoms involving nervous and musculoskeletal systems	1.51631	1.51631	0.416282
288	Diseases of white blood cells	995	Certain adverse effects not elsewhere classified	2.16667	2.16667	0.773189
516	Other alveolar and parietoalveolar pneumonopathy	094	Neurosyphilis	0.841447	1	0
516	Other alveolar and parietoalveolar pneumonopathy	153	Malignant neoplasm of colon	0.788572	0.788572	-0.237532
516	Other alveolar and parietoalveolar pneumonopathy	157	Malignant neoplasm of pancreas	0.790803	1	0
516	Other alveolar and parietoalveolar pneumonopathy	161	Malignant neoplasm of larynx	1.19586	1	0
516	Other alveolar and parietoalveolar pneumonopathy	170	Malignant neoplasm of bone and articular cartilage	1.06214	1	0
516	Other alveolar and parietoalveolar pneumonopathy	171	Malignant neoplasm of connective and other soft tissue	0.99383	1	0
516	Other alveolar and parietoalveolar pneumonopathy	172	Malignant melanoma of skin	0.793029	1	0
516	Other alveolar and parietoalveolar pneumonopathy	173	Other malignant neoplasm of skin	1.10767	1	0
516	Other alveolar and parietoalveolar pneumonopathy	176	Kaposi's sarcoma	0.419289	1	0
516	Other alveolar and parietoalveolar pneumonopathy	183	Malignant neoplasm of ovary and other uterine adnexa	0.600803	0.600803	-0.509488
516	Other alveolar and parietoalveolar pneumonopathy	185	Malignant neoplasm of prostate	0.833061	0.833061	-0.182648
516	Other alveolar and parietoalveolar pneumonopathy	186	Malignant neoplasm of testis		1	0
516	Other alveolar and parietoalveolar pneumonopathy	188	Malignant neoplasm of bladder	1.06392	1	0
516	Other alveolar and parietoalveolar pneumonopathy	190	Malignant neoplasm of eye	0.230637	1	0
516	Other alveolar and parietoalveolar pneumonopathy	191	Malignant neoplasm of brain	1.04732	1	0
516	Other alveolar and parietoalveolar pneumonopathy	193	Malignant neoplasm of thyroid gland	0.36686	0.36686	-1.00278
516	Other alveolar and parietoalveolar pneumonopathy	194	Malignant neoplasm of other endocrine glands and related structures	0.624818	1	0
516	Other alveolar and parietoalveolar pneumonopathy	203	Multiple myeloma and immunoproliferative neoplasms	2.08069	2.08069	0.732699
516	Other alveolar and parietoalveolar pneumonopathy	204	Lymphoid leukemia	2.55241	2.55241	0.937037
516	Other alveolar and parietoalveolar pneumonopathy	207	Other specified leukemia	4.82906	4.82906	1.57465
516	Other alveolar and parietoalveolar pneumonopathy	208	Leukemia of unspecified cell type	3.30419	3.30419	1.19519
516	Other alveolar and parietoalveolar pneumonopathy	216	Benign neoplasm of skin	0.994512	1	0
516	Other alveolar and parietoalveolar pneumonopathy	237	Neoplasm of uncertain behavior of endocrine glands and nervous system	1.2479	1	0
516	Other alveolar and parietoalveolar pneumonopathy	244	Acquired hypothyroidism	1.3994	1.3994	0.336047
516	Other alveolar and parietoalveolar pneumonopathy	250	Diabetes mellitus	1.09221	1.09221	0.0882007
516	Other alveolar and parietoalveolar pneumonopathy	251	Other disorders of pancreatic internal secretion	2.26416	2.26416	0.817202
516	Other alveolar and parietoalveolar pneumonopathy	255	Disorders of adrenal glands	4.21383	4.21383	1.43837
516	Other alveolar and parietoalveolar pneumonopathy	259	Other endocrine disorders	0.983169	1	0
516	Other alveolar and parietoalveolar pneumonopathy	260	Kwashiorkor	2.05473	2.05473	0.720144
516	Other alveolar and parietoalveolar pneumonopathy	268	Vitamin D deficiency	2.02267	1	0
516	Other alveolar and parietoalveolar pneumonopathy	270	Disorders of amino-acid transport and metabolism	1.37634	1	0
516	Other alveolar and parietoalveolar pneumonopathy	271	Disorders of carbohydrate transport and metabolism	2.0272	2.0272	0.706654
516	Other alveolar and parietoalveolar pneumonopathy	272	Disorders of lipoid metabolism	0.846484	0.846484	-0.166664
516	Other alveolar and parietoalveolar pneumonopathy	275	Disorders of mineral metabolism	1.59973	1.59973	0.469836
516	Other alveolar and parietoalveolar pneumonopathy	276	Disorders of fluid, electrolyte, and acid-base balance	1.66639	1.66639	0.510658
516	Other alveolar and parietoalveolar pneumonopathy	277	Other and unspecified disorders of metabolism	2.39471	2.39471	0.873262
516	Other alveolar and parietoalveolar pneumonopathy	281	Other deficiency anemias	1.83528	1.83528	0.607198
516	Other alveolar and parietoalveolar pneumonopathy	282	Hereditary hemolytic anemias	1.38532	1.38532	0.325932
516	Other alveolar and parietoalveolar pneumonopathy	283	Acquired hemolytic anemias	3.21959	3.21959	1.16925
516	Other alveolar and parietoalveolar pneumonopathy	284	Aplastic anemia and other bone marrow failure syndromes	2.76025	2.76025	1.01532
516	Other alveolar and parietoalveolar pneumonopathy	285	Other and unspecified anemias	1.34751	1.34751	0.298259
516	Other alveolar and parietoalveolar pneumonopathy	286	Coagulation defects	1.81588	1.81588	0.596572
516	Other alveolar and parietoalveolar pneumonopathy	287	Purpura and other hemorrhagic conditions	2.28382	2.28382	0.82585
516	Other alveolar and parietoalveolar pneumonopathy	289	Other diseases of blood and blood-forming organs	2.47936	2.47936	0.908002
516	Other alveolar and parietoalveolar pneumonopathy	330	Cerebral degenerations usually manifest in childhood	1.21565	1	0
516	Other alveolar and parietoalveolar pneumonopathy	331	Other cerebral degenerations	1.02711	1	0
516	Other alveolar and parietoalveolar pneumonopathy	332	Parkinson's disease	0.96383	1	0
516	Other alveolar and parietoalveolar pneumonopathy	333	Other extrapyramidal disease and abnormal movement disorders	1.383	1.383	0.324258
516	Other alveolar and parietoalveolar pneumonopathy	334	Spinocerebellar disease	1.14335	1	0
516	Other alveolar and parietoalveolar pneumonopathy	335	Anterior horn cell disease	0.8064	1	0
516	Other alveolar and parietoalveolar pneumonopathy	355	Mononeuritis of lower limb	1.63136	1.63136	0.489415
516	Other alveolar and parietoalveolar pneumonopathy	356	Hereditary and idiopathic peripheral neuropathy	1.78835	1.78835	0.581292
516	Other alveolar and parietoalveolar pneumonopathy	362	Other retinal disorders	0.950151	1	0
516	Other alveolar and parietoalveolar pneumonopathy	365	Glaucoma	1.08083	1	0
516	Other alveolar and parietoalveolar pneumonopathy	366	Cataract	1.14684	1	0
516	Other alveolar and parietoalveolar pneumonopathy	370	Keratitis	1.37008	1	0
516	Other alveolar and parietoalveolar pneumonopathy	371	Corneal opacity and other disorders of cornea	0.799368	1	0
516	Other alveolar and parietoalveolar pneumonopathy	374	Other disorders of eyelids	1.04166	1	0
516	Other alveolar and parietoalveolar pneumonopathy	377	Disorders of optic nerve and visual pathways	0.816099	1	0
516	Other alveolar and parietoalveolar pneumonopathy	401	Essential hypertension	0.902654	0.902654	-0.102416
516	Other alveolar and parietoalveolar pneumonopathy	425	Cardiomyopathy	1.9551	1.9551	0.670443
516	Other alveolar and parietoalveolar pneumonopathy	492	Emphysema	4.01532	4.01532	1.39012
516	Other alveolar and parietoalveolar pneumonopathy	515	Postinflammatory pulmonary fibrosis	18.1863	18.1863	2.90067
516	Other alveolar and parietoalveolar pneumonopathy	523	Gingival and periodontal diseases	0.922243	1	0
516	Other alveolar and parietoalveolar pneumonopathy	555	Regional enteritis	1.01112	1	0
516	Other alveolar and parietoalveolar pneumonopathy	569	Other disorders of intestine	1.30665	1.30665	0.267468
516	Other alveolar and parietoalveolar pneumonopathy	587	Renal sclerosis, unspecified	1.47849	1	0
516	Other alveolar and parietoalveolar pneumonopathy	695	Erythematous conditions	2.60528	2.60528	0.95754
516	Other alveolar and parietoalveolar pneumonopathy	706	Diseases of sebaceous glands	1.4644	1.4644	0.381447
516	Other alveolar and parietoalveolar pneumonopathy	709	Other disorders of skin and subcutaneous tissue	1.02375	1	0
516	Other alveolar and parietoalveolar pneumonopathy	714	Rheumatoid arthritis and other inflammatory polyarthropathies	2.94951	2.94951	1.08164
516	Other alveolar and parietoalveolar pneumonopathy	720	Ankylosing spondylitis and other inflammatory spondylopathies	1.58671	1.58671	0.461664
516	Other alveolar and parietoalveolar pneumonopathy	728	Disorders of muscle, ligament, and fascia	1.46955	1.46955	0.384958
516	Other alveolar and parietoalveolar pneumonopathy	733	Other disorders of bone and cartilage	2.04296	2.04296	0.714402
516	Other alveolar and parietoalveolar pneumonopathy	743	Congenital anomalies of eye	1.3414	1	0
516	Other alveolar and parietoalveolar pneumonopathy	744	Congenital anomalies of ear, face, and neck	1.01923	1	0
516	Other alveolar and parietoalveolar pneumonopathy	755	Other congenital anomalies of limbs	0.441162	1	0
516	Other alveolar and parietoalveolar pneumonopathy	756	Other congenital musculoskeletal anomalies	1.0064	1	0
516	Other alveolar and parietoalveolar pneumonopathy	757	Congenital anomalies of the integument	1.92896	1	0
516	Other alveolar and parietoalveolar pneumonopathy	758	Chromosomal anomalies	2.06756	1	0
516	Other alveolar and parietoalveolar pneumonopathy	759	Other and unspecified congenital anomalies	1.63116	1	0
516	Other alveolar and parietoalveolar pneumonopathy	781	Symptoms involving nervous and musculoskeletal systems	1.18979	1.18979	0.173777
516	Other alveolar and parietoalveolar pneumonopathy	995	Certain adverse effects not elsewhere classified	2.1081	2.1081	0.745786
528	Diseases of the oral soft tissues, excluding lesions specific for gingiva and tongue	094	Neurosyphilis	1.48391	1	0
528	Diseases of the oral soft tissues, excluding lesions specific for gingiva and tongue	153	Malignant neoplasm of colon	3.2455	3.2455	1.17727
528	Diseases of the oral soft tissues, excluding lesions specific for gingiva and tongue	157	Malignant neoplasm of pancreas	4.4428	4.4428	1.49128
528	Diseases of the oral soft tissues, excluding lesions specific for gingiva and tongue	161	Malignant neoplasm of larynx	13.458	13.458	2.59958
528	Diseases of the oral soft tissues, excluding lesions specific for gingiva and tongue	170	Malignant neoplasm of bone and articular cartilage	15.4364	15.4364	2.73673
528	Diseases of the oral soft tissues, excluding lesions specific for gingiva and tongue	171	Malignant neoplasm of connective and other soft tissue	8.39767	8.39767	2.12795
528	Diseases of the oral soft tissues, excluding lesions specific for gingiva and tongue	172	Malignant melanoma of skin	2.02587	2.02587	0.705997
528	Diseases of the oral soft tissues, excluding lesions specific for gingiva and tongue	173	Other malignant neoplasm of skin	4.08123	4.08123	1.4064
528	Diseases of the oral soft tissues, excluding lesions specific for gingiva and tongue	176	Kaposi's sarcoma	5.49289	5.49289	1.70345
528	Diseases of the oral soft tissues, excluding lesions specific for gingiva and tongue	183	Malignant neoplasm of ovary and other uterine adnexa	3.7462	3.7462	1.32074
528	Diseases of the oral soft tissues, excluding lesions specific for gingiva and tongue	185	Malignant neoplasm of prostate	0.855678	0.855678	-0.155861
528	Diseases of the oral soft tissues, excluding lesions specific for gingiva and tongue	186	Malignant neoplasm of testis		1	0
528	Diseases of the oral soft tissues, excluding lesions specific for gingiva and tongue	188	Malignant neoplasm of bladder	2.55597	2.55597	0.938432
528	Diseases of the oral soft tissues, excluding lesions specific for gingiva and tongue	190	Malignant neoplasm of eye	1.69957	1	0
528	Diseases of the oral soft tissues, excluding lesions specific for gingiva and tongue	191	Malignant neoplasm of brain	2.2115	2.2115	0.793671
528	Diseases of the oral soft tissues, excluding lesions specific for gingiva and tongue	193	Malignant neoplasm of thyroid gland	2.20277	2.20277	0.789714
528	Diseases of the oral soft tissues, excluding lesions specific for gingiva and tongue	194	Malignant neoplasm of other endocrine glands and related structures	3.41059	3.41059	1.22689
528	Diseases of the oral soft tissues, excluding lesions specific for gingiva and tongue	203	Multiple myeloma and immunoproliferative neoplasms	4.40938	4.40938	1.48373
528	Diseases of the oral soft tissues, excluding lesions specific for gingiva and tongue	204	Lymphoid leukemia	4.66757	4.66757	1.54064
528	Diseases of the oral soft tissues, excluding lesions specific for gingiva and tongue	207	Other specified leukemia	10.8733	10.8733	2.38631
528	Diseases of the oral soft tissues, excluding lesions specific for gingiva and tongue	208	Leukemia of unspecified cell type	10.4459	10.4459	2.34621
528	Diseases of the oral soft tissues, excluding lesions specific for gingiva and tongue	216	Benign neoplasm of skin	2.06703	2.06703	0.726115
528	Diseases of the oral soft tissues, excluding lesions specific for gingiva and tongue	237	Neoplasm of uncertain behavior of endocrine glands and nervous system	1.0596	1	0
528	Diseases of the oral soft tissues, excluding lesions specific for gingiva and tongue	244	Acquired hypothyroidism	1.42797	1.42797	0.356256
528	Diseases of the oral soft tissues, excluding lesions specific for gingiva and tongue	250	Diabetes mellitus	1.01259	1	0
528	Diseases of the oral soft tissues, excluding lesions specific for gingiva and tongue	251	Other disorders of pancreatic internal secretion	1.81956	1.81956	0.598592
528	Diseases of the oral soft tissues, excluding lesions specific for gingiva and tongue	255	Disorders of adrenal glands	3.07244	3.07244	1.12247
528	Diseases of the oral soft tissues, excluding lesions specific for gingiva and tongue	259	Other endocrine disorders	3.70299	3.70299	1.30914
528	Diseases of the oral soft tissues, excluding lesions specific for gingiva and tongue	260	Kwashiorkor	3.57504	3.57504	1.27398
528	Diseases of the oral soft tissues, excluding lesions specific for gingiva and tongue	268	Vitamin D deficiency	2.10779	1	0
528	Diseases of the oral soft tissues, excluding lesions specific for gingiva and tongue	270	Disorders of amino-acid transport and metabolism	3.94422	3.94422	1.37225
528	Diseases of the oral soft tissues, excluding lesions specific for gingiva and tongue	271	Disorders of carbohydrate transport and metabolism	1.53336	1.53336	0.427464
528	Diseases of the oral soft tissues, excluding lesions specific for gingiva and tongue	272	Disorders of lipoid metabolism	0.886757	0.886757	-0.120184
528	Diseases of the oral soft tissues, excluding lesions specific for gingiva and tongue	275	Disorders of mineral metabolism	3.33375	3.33375	1.2041
528	Diseases of the oral soft tissues, excluding lesions specific for gingiva and tongue	276	Disorders of fluid, electrolyte, and acid-base balance	1.97395	1.97395	0.680037
528	Diseases of the oral soft tissues, excluding lesions specific for gingiva and tongue	277	Other and unspecified disorders of metabolism	2.19603	2.19603	0.78665
528	Diseases of the oral soft tissues, excluding lesions specific for gingiva and tongue	281	Other deficiency anemias	1.98355	1.98355	0.684889
528	Diseases of the oral soft tissues, excluding lesions specific for gingiva and tongue	282	Hereditary hemolytic anemias	2.01994	2.01994	0.703066
528	Diseases of the oral soft tissues, excluding lesions specific for gingiva and tongue	283	Acquired hemolytic anemias	3.48401	3.48401	1.24818
528	Diseases of the oral soft tissues, excluding lesions specific for gingiva and tongue	284	Aplastic anemia and other bone marrow failure syndromes	14.8676	14.8676	2.69919
528	Diseases of the oral soft tissues, excluding lesions specific for gingiva and tongue	285	Other and unspecified anemias	1.83227	1.83227	0.605554
528	Diseases of the oral soft tissues, excluding lesions specific for gingiva and tongue	286	Coagulation defects	2.2704	2.2704	0.819954
528	Diseases of the oral soft tissues, excluding lesions specific for gingiva and tongue	287	Purpura and other hemorrhagic conditions	5.32447	5.32447	1.67231
528	Diseases of the oral soft tissues, excluding lesions specific for gingiva and tongue	289	Other diseases of blood and blood-forming organs	3.9441	3.9441	1.37222
528	Diseases of the oral soft tissues, excluding lesions specific for gingiva and tongue	330	Cerebral degenerations usually manifest in childhood		1	0
528	Diseases of the oral soft tissues, excluding lesions specific for gingiva and tongue	331	Other cerebral degenerations	0.964577	1	0
528	Diseases of the oral soft tissues, excluding lesions specific for gingiva and tongue	332	Parkinson's disease	1.12343	1	0
528	Diseases of the oral soft tissues, excluding lesions specific for gingiva and tongue	333	Other extrapyramidal disease and abnormal movement disorders	2.0862	2.0862	0.735345
528	Diseases of the oral soft tissues, excluding lesions specific for gingiva and tongue	334	Spinocerebellar disease	1.64535	1.64535	0.497954
528	Diseases of the oral soft tissues, excluding lesions specific for gingiva and tongue	335	Anterior horn cell disease	1.10924	1	0
528	Diseases of the oral soft tissues, excluding lesions specific for gingiva and tongue	355	Mononeuritis of lower limb	2.1842	2.1842	0.781252
528	Diseases of the oral soft tissues, excluding lesions specific for gingiva and tongue	356	Hereditary and idiopathic peripheral neuropathy	2.13499	2.13499	0.758461
528	Diseases of the oral soft tissues, excluding lesions specific for gingiva and tongue	362	Other retinal disorders	1.07684	1	0
528	Diseases of the oral soft tissues, excluding lesions specific for gingiva and tongue	365	Glaucoma	1.12587	1	0
528	Diseases of the oral soft tissues, excluding lesions specific for gingiva and tongue	366	Cataract	1.27109	1.27109	0.239877
528	Diseases of the oral soft tissues, excluding lesions specific for gingiva and tongue	370	Keratitis	1.86054	1.86054	0.620867
528	Diseases of the oral soft tissues, excluding lesions specific for gingiva and tongue	371	Corneal opacity and other disorders of cornea	0.627235	1	0
528	Diseases of the oral soft tissues, excluding lesions specific for gingiva and tongue	374	Other disorders of eyelids	3.11747	3.11747	1.13702
528	Diseases of the oral soft tissues, excluding lesions specific for gingiva and tongue	377	Disorders of optic nerve and visual pathways	0.965185	1	0
528	Diseases of the oral soft tissues, excluding lesions specific for gingiva and tongue	401	Essential hypertension	1.03731	1.03731	0.0366267
528	Diseases of the oral soft tissues, excluding lesions specific for gingiva and tongue	425	Cardiomyopathy	1.08214	1	0
528	Diseases of the oral soft tissues, excluding lesions specific for gingiva and tongue	492	Emphysema	1.71516	1.71516	0.539509
528	Diseases of the oral soft tissues, excluding lesions specific for gingiva and tongue	515	Postinflammatory pulmonary fibrosis	1.67465	1.67465	0.515604
528	Diseases of the oral soft tissues, excluding lesions specific for gingiva and tongue	523	Gingival and periodontal diseases	26.3031	26.3031	3.26969
528	Diseases of the oral soft tissues, excluding lesions specific for gingiva and tongue	555	Regional enteritis	2.12565	2.12565	0.754075
528	Diseases of the oral soft tissues, excluding lesions specific for gingiva and tongue	569	Other disorders of intestine	1.84164	1.84164	0.610655
528	Diseases of the oral soft tissues, excluding lesions specific for gingiva and tongue	587	Renal sclerosis, unspecified	1.29126	1	0
528	Diseases of the oral soft tissues, excluding lesions specific for gingiva and tongue	695	Erythematous conditions	5.48209	5.48209	1.70149
528	Diseases of the oral soft tissues, excluding lesions specific for gingiva and tongue	706	Diseases of sebaceous glands	2.58539	2.58539	0.949877
528	Diseases of the oral soft tissues, excluding lesions specific for gingiva and tongue	709	Other disorders of skin and subcutaneous tissue	4.11002	4.11002	1.41343
528	Diseases of the oral soft tissues, excluding lesions specific for gingiva and tongue	714	Rheumatoid arthritis and other inflammatory polyarthropathies	2.32555	2.32555	0.843957
528	Diseases of the oral soft tissues, excluding lesions specific for gingiva and tongue	720	Ankylosing spondylitis and other inflammatory spondylopathies	1.91456	1.91456	0.649489
528	Diseases of the oral soft tissues, excluding lesions specific for gingiva and tongue	728	Disorders of muscle, ligament, and fascia	1.77053	1.77053	0.57128
528	Diseases of the oral soft tissues, excluding lesions specific for gingiva and tongue	733	Other disorders of bone and cartilage	1.78169	1.78169	0.577564
528	Diseases of the oral soft tissues, excluding lesions specific for gingiva and tongue	743	Congenital anomalies of eye		1	0
528	Diseases of the oral soft tissues, excluding lesions specific for gingiva and tongue	744	Congenital anomalies of ear, face, and neck	6.67622	6.67622	1.89855
528	Diseases of the oral soft tissues, excluding lesions specific for gingiva and tongue	755	Other congenital anomalies of limbs	1.15589	1	0
528	Diseases of the oral soft tissues, excluding lesions specific for gingiva and tongue	756	Other congenital musculoskeletal anomalies	1.33548	1	0
528	Diseases of the oral soft tissues, excluding lesions specific for gingiva and tongue	757	Congenital anomalies of the integument	2.10586	1	0
528	Diseases of the oral soft tissues, excluding lesions specific for gingiva and tongue	758	Chromosomal anomalies	1.12858	1	0
528	Diseases of the oral soft tissues, excluding lesions specific for gingiva and tongue	759	Other and unspecified congenital anomalies	1.21415	1	0
528	Diseases of the oral soft tissues, excluding lesions specific for gingiva and tongue	781	Symptoms involving nervous and musculoskeletal systems	1.58304	1.58304	0.459345
528	Diseases of the oral soft tissues, excluding lesions specific for gingiva and tongue	995	Certain adverse effects not elsewhere classified	2.28302	2.28302	0.825501

## Sheet: random_EBV
Relative risks of EBV-implicated diseases with all mappable diseases (3 digit)
EBV-implicated disease code	EBV-implicated disease name	Mappable disease code	Mappable disease name	RR (calculated)	RR (corrected)	Log(RR_corrected)
075	Infectious mononucleosis	011	Pulmonary tuberculosis	2.49914	1	0
075	Infectious mononucleosis	027	Other zoonotic bacterial diseases	0	1	0
075	Infectious mononucleosis	030	Leprosy	0	1	0
075	Infectious mononucleosis	031	Diseases due to other mycobacteria	0	1	0
075	Infectious mononucleosis	041	Bacterial infection in conditions classified elsewhere and of unspecified site	1.43626	1.43626	0.362042
075	Infectious mononucleosis	042	Human immunodeficiency virus [HIV] disease	0	1	0
075	Infectious mononucleosis	046	Slow virus infection of central nervous system	0	1	0
075	Infectious mononucleosis	061	Dengue	0	1	0
075	Infectious mononucleosis	078	Other diseases due to viruses and Chlamydiae	137.018	137.018	4.92011
075	Infectious mononucleosis	079	Viral and chlamydial infection in conditions classified elsewhere and of unspecified site	8.18226	8.18226	2.10197
075	Infectious mononucleosis	084	Malaria	0	1	0
075	Infectious mononucleosis	094	Neurosyphilis	2.61172	1	0
075	Infectious mononucleosis	117	Other mycoses	5.88432	5.88432	1.77229
075	Infectious mononucleosis	135	Sarcoidosis	2.00921	1	0
075	Infectious mononucleosis	142	Malignant neoplasm of major salivary glands	0	1	0
075	Infectious mononucleosis	143	Malignant neoplasm of gum	0	1	0
075	Infectious mononucleosis	147	Malignant neoplasm of nasopharynx	0	1	0
075	Infectious mononucleosis	150	Malignant neoplasm of esophagus	0	1	0
075	Infectious mononucleosis	151	Malignant neoplasm of stomach	0.501857	1	0
075	Infectious mononucleosis	153	Malignant neoplasm of colon	0.455484	1	0
075	Infectious mononucleosis	157	Malignant neoplasm of pancreas	0.490905	1	0
075	Infectious mononucleosis	158	Malignant neoplasm of retroperitoneum and peritoneum	0	1	0
075	Infectious mononucleosis	161	Malignant neoplasm of larynx	0	1	0
075	Infectious mononucleosis	162	Malignant neoplasm of trachea, bronchus, and lung	0.639047	1	0
075	Infectious mononucleosis	163	Malignant neoplasm of pleura	0	1	0
075	Infectious mononucleosis	170	Malignant neoplasm of bone and articular cartilage	0	1	0
075	Infectious mononucleosis	171	Malignant neoplasm of connective and other soft tissue	0	1	0
075	Infectious mononucleosis	172	Malignant melanoma of skin	0	1	0
075	Infectious mononucleosis	173	Other malignant neoplasm of skin	0.328637	1	0
075	Infectious mononucleosis	176	Kaposi's sarcoma	0	1	0
075	Infectious mononucleosis	182	Malignant neoplasm of body of uterus	0.25484	1	0
075	Infectious mononucleosis	183	Malignant neoplasm of ovary and other uterine adnexa	0	1	0
075	Infectious mononucleosis	185	Malignant neoplasm of prostate	0.567924	1	0
075	Infectious mononucleosis	186	Malignant neoplasm of testis	0	1	0
075	Infectious mononucleosis	188	Malignant neoplasm of bladder	0.771183	1	0
075	Infectious mononucleosis	189	Malignant neoplasm of kidney and other and unspecified urinary organs	0.564518	1	0
075	Infectious mononucleosis	190	Malignant neoplasm of eye	4.65309	1	0
075	Infectious mononucleosis	191	Malignant neoplasm of brain	0	1	0
075	Infectious mononucleosis	192	Malignant neoplasm of other and unspecified parts of nervous system	0	1	0
075	Infectious mononucleosis	193	Malignant neoplasm of thyroid gland	1.64475	1	0
075	Infectious mononucleosis	194	Malignant neoplasm of other endocrine glands and related structures	0	1	0
075	Infectious mononucleosis	199	Malignant neoplasm without specification of site	0.459452	1	0
075	Infectious mononucleosis	200	Lymphosarcoma and reticulosarcoma and other specified malignant tumors of lymphatic tissue	3.60438	3.60438	1.28215
075	Infectious mononucleosis	202	Other malignant neoplasms of lymphoid and histiocytic tissue	4.66111	4.66111	1.53925
075	Infectious mononucleosis	203	Multiple myeloma and immunoproliferative neoplasms	1.48157	1	0
075	Infectious mononucleosis	204	Lymphoid leukemia	4.87332	4.87332	1.58378
075	Infectious mononucleosis	205	Myeloid leukemia	3.01532	1	0
075	Infectious mononucleosis	207	Other specified leukemia	48.713	48.713	3.88595
075	Infectious mononucleosis	208	Leukemia of unspecified cell type	7.40688	7.40688	2.00241
075	Infectious mononucleosis	210	Benign neoplasm of lip, oral cavity, and pharynx	2.24734	1	0
075	Infectious mononucleosis	211	Benign neoplasm of other parts of digestive system	1.35031	1	0
075	Infectious mononucleosis	213	Benign neoplasm of bone and articular cartilage	3.09255	1	0
075	Infectious mononucleosis	214	Lipoma	0	1	0
075	Infectious mononucleosis	215	Other benign neoplasm of connective and other soft tissue	2.82366	1	0
075	Infectious mononucleosis	216	Benign neoplasm of skin	0	1	0
075	Infectious mononucleosis	218	Uterine leiomyoma	0.412883	1	0
075	Infectious mononucleosis	227	Benign neoplasm of other endocrine glands and related structures	0.708998	1	0
075	Infectious mononucleosis	228	Hemangioma and lymphangioma, any site	2.18562	1	0
075	Infectious mononucleosis	235	Neoplasm of uncertain behavior of digestive and respiratory systems	0.431457	1	0
075	Infectious mononucleosis	236	Neoplasm of uncertain behavior of genitourinary organs	1.60568	1	0
075	Infectious mononucleosis	237	Neoplasm of uncertain behavior of endocrine glands and nervous system	0	1	0
075	Infectious mononucleosis	238	Neoplasm of uncertain behavior of other and unspecified sites and tissues	4.22165	4.22165	1.44023
075	Infectious mononucleosis	239	Neoplasms of unspecified nature	1.54615	1	0
075	Infectious mononucleosis	240	Simple and unspecified goiter	1.46604	1	0
075	Infectious mononucleosis	242	Thyrotoxicosis with or without goiter	1.66331	1	0
075	Infectious mononucleosis	243	Congenital hypothyroidism	0	1	0
075	Infectious mononucleosis	244	Acquired hypothyroidism	1.82861	1.82861	0.603556
075	Infectious mononucleosis	245	Thyroiditis	3.15612	1	0
075	Infectious mononucleosis	246	Other disorders of thyroid	3.41474	1	0
075	Infectious mononucleosis	250	Diabetes mellitus	0.998802	1	0
075	Infectious mononucleosis	251	Other disorders of pancreatic internal secretion	1.35179	1	0
075	Infectious mononucleosis	252	Disorders of parathyroid gland	0.54136	1	0
075	Infectious mononucleosis	253	Disorders of the pituitary gland and its hypothalamic control	3.53245	3.53245	1.26199
075	Infectious mononucleosis	255	Disorders of adrenal glands	3.72323	3.72323	1.31459
075	Infectious mononucleosis	256	Ovarian dysfunction	0	1	0
075	Infectious mononucleosis	257	Testicular dysfunction	0	1	0
075	Infectious mononucleosis	258	Polyglandular dysfunction and related disorders	0	1	0
075	Infectious mononucleosis	259	Other endocrine disorders	0	1	0
075	Infectious mononucleosis	260	Kwashiorkor	3.88632	1	0
075	Infectious mononucleosis	264	Vitamin A deficiency	0	1	0
075	Infectious mononucleosis	265	Thiamine and niacin deficiency states	0	1	0
075	Infectious mononucleosis	266	Deficiency of B-complex components	3.65007	3.65007	1.29475
075	Infectious mononucleosis	267	Ascorbic acid deficiency	0	1	0
075	Infectious mononucleosis	268	Vitamin D deficiency	0	1	0
075	Infectious mononucleosis	269	Other nutritional deficiencies	1.2429	1	0
075	Infectious mononucleosis	270	Disorders of amino-acid transport and metabolism	13.8838	13.8838	2.63072
075	Infectious mononucleosis	271	Disorders of carbohydrate transport and metabolism	1.94755	1	0
075	Infectious mononucleosis	272	Disorders of lipoid metabolism	1.42065	1.42065	0.351113
075	Infectious mononucleosis	273	Disorders of plasma protein metabolism	3.52459	3.52459	1.25977
075	Infectious mononucleosis	274	Gout	1.21959	1	0
075	Infectious mononucleosis	275	Disorders of mineral metabolism	2.00819	2.00819	0.697236
075	Infectious mononucleosis	276	Disorders of fluid, electrolyte, and acid-base balance	1.6179	1.6179	0.481126
075	Infectious mononucleosis	277	Other and unspecified disorders of metabolism	2.5767	1	0
075	Infectious mononucleosis	278	Overweight, obesity and other hyperalimentation	1.24318	1	0
075	Infectious mononucleosis	279	Disorders involving the immune mechanism	12.2023	12.2023	2.50162
075	Infectious mononucleosis	280	Iron deficiency anemias	1.43439	1.43439	0.36074
075	Infectious mononucleosis	281	Other deficiency anemias	1.89248	1.89248	0.637888
075	Infectious mononucleosis	282	Hereditary hemolytic anemias	6.89149	6.89149	1.93029
075	Infectious mononucleosis	283	Acquired hemolytic anemias	7.59709	7.59709	2.02776
075	Infectious mononucleosis	284	Aplastic anemia and other bone marrow failure syndromes	4.37086	4.37086	1.47496
075	Infectious mononucleosis	285	Other and unspecified anemias	1.05027	1	0
075	Infectious mononucleosis	286	Coagulation defects	1.98029	1.98029	0.683244
075	Infectious mononucleosis	287	Purpura and other hemorrhagic conditions	3.40657	3.40657	1.22571
075	Infectious mononucleosis	288	Diseases of white blood cells	5.99675	5.99675	1.79122
075	Infectious mononucleosis	289	Other diseases of blood and blood-forming organs	4.69586	4.69586	1.54668
075	Infectious mononucleosis	290	Dementias	0.774926	1	0
075	Infectious mononucleosis	291	Alcohol-induced mental disorders	0.839306	1	0
075	Infectious mononucleosis	294	Persistent mental disorders due to conditions classified elsewhere	0.237881	1	0
075	Infectious mononucleosis	295	Schizophrenic disorders	0.376463	1	0
075	Infectious mononucleosis	296	Episodic mood disorders	2.30315	2.30315	0.834276
075	Infectious mononucleosis	299	Pervasive developmental disorders	0	1	0
075	Infectious mononucleosis	300	Anxiety, dissociative and somatoform disorders	2.61539	2.61539	0.961411
075	Infectious mononucleosis	301	Personality disorders	4.05861	4.05861	1.40084
075	Infectious mononucleosis	302	Sexual and gender identity disorders	0	1	0
075	Infectious mononucleosis	303	Alcohol dependence syndrome	0.333362	1	0
075	Infectious mononucleosis	304	Drug dependence	3.54618	3.54618	1.26587
075	Infectious mononucleosis	307	Special symptoms or syndromes, not elsewhere classified	2.38684	1	0
075	Infectious mononucleosis	311	Depressive disorder, not elsewhere classified	2.74742	2.74742	1.01066
075	Infectious mononucleosis	314	Hyperkinetic syndrome of childhood	0	1	0
075	Infectious mononucleosis	319	Unspecified mental retardation	0	1	0
075	Infectious mononucleosis	322	Meningitis of unspecified cause	2.23066	1	0
075	Infectious mononucleosis	323	Encephalitis, myelitis, and encephalomyelitis	7.11497	7.11497	1.9622
075	Infectious mononucleosis	327	Organic sleep disorders	0	1	0
075	Infectious mononucleosis	330	Cerebral degenerations usually manifest in childhood	0	1	0
075	Infectious mononucleosis	331	Other cerebral degenerations	0.894475	1	0
075	Infectious mononucleosis	332	Parkinson's disease	0.928913	1	0
075	Infectious mononucleosis	333	Other extrapyramidal disease and abnormal movement disorders	2.08397	1	0
075	Infectious mononucleosis	334	Spinocerebellar disease	1.398	1	0
075	Infectious mononucleosis	335	Anterior horn cell disease	1.30153	1	0
075	Infectious mononucleosis	337	Disorders of the autonomic nervous system	2.19979	1	0
075	Infectious mononucleosis	340	Multiple sclerosis	0.865505	1	0
075	Infectious mononucleosis	341	Other demyelinating diseases of central nervous system	0	1	0
075	Infectious mononucleosis	342	Hemiplegia and hemiparesis	0.858397	1	0
075	Infectious mononucleosis	345	Epilepsy and recurrent seizures	1.47125	1	0
075	Infectious mononucleosis	346	Migraine	4.67018	4.67018	1.5412
075	Infectious mononucleosis	347	Cataplexy and narcolepsy	0	1	0
075	Infectious mononucleosis	348	Other conditions of brain	2.05975	2.05975	0.722584
075	Infectious mononucleosis	349	Other and unspecified disorders of the nervous system	0.419952	1	0
075	Infectious mononucleosis	351	Facial nerve disorders	2.63078	1	0
075	Infectious mononucleosis	354	Mononeuritis of upper limb and mononeuritis multiplex	1.69885	1	0
075	Infectious mononucleosis	355	Mononeuritis of lower limb	2.89797	2.89797	1.06401
075	Infectious mononucleosis	356	Hereditary and idiopathic peripheral neuropathy	2.79328	2.79328	1.02722
075	Infectious mononucleosis	358	Myoneural disorders	0	1	0
075	Infectious mononucleosis	359	Muscular dystrophies and other myopathies	0	1	0
075	Infectious mononucleosis	361	Retinal detachments and defects	1.0914	1	0
075	Infectious mononucleosis	362	Other retinal disorders	0.974709	1	0
075	Infectious mononucleosis	363	Chorioretinal inflammations, scars, and other disorders of choroid	2.37226	1	0
075	Infectious mononucleosis	365	Glaucoma	0.605715	1	0
075	Infectious mononucleosis	366	Cataract	1.12865	1	0
075	Infectious mononucleosis	368	Visual disturbances	1.25823	1	0
075	Infectious mononucleosis	370	Keratitis	1.34836	1	0
075	Infectious mononucleosis	371	Corneal opacity and other disorders of cornea	1.34394	1	0
075	Infectious mononucleosis	374	Other disorders of eyelids	1.44935	1	0
075	Infectious mononucleosis	377	Disorders of optic nerve and visual pathways	3.65884	1	0
075	Infectious mononucleosis	378	Strabismus and other disorders of binocular eye movements	1.06657	1	0
075	Infectious mononucleosis	386	Vertiginous syndromes and other disorders of vestibular system	2.50497	2.50497	0.918277
075	Infectious mononucleosis	389	Hearing loss	1.11147	1	0
075	Infectious mononucleosis	401	Essential hypertension	1.027	1	0
075	Infectious mononucleosis	403	Hypertensive chronic kidney disease	1.0013	1	0
075	Infectious mononucleosis	405	Secondary hypertension	0.946772	1	0
075	Infectious mononucleosis	410	Acute myocardial infarction	0.65927	0.65927	-0.416622
075	Infectious mononucleosis	414	Other forms of chronic ischemic heart disease	1.05617	1	0
075	Infectious mononucleosis	416	Chronic pulmonary heart disease	1.30025	1	0
075	Infectious mononucleosis	425	Cardiomyopathy	0.858816	1	0
075	Infectious mononucleosis	426	Conduction disorders	1.02654	1	0
075	Infectious mononucleosis	427	Cardiac dysrhythmias	1.0576	1	0
075	Infectious mononucleosis	428	Heart failure	1.04232	1	0
075	Infectious mononucleosis	434	Occlusion of cerebral arteries	0.711018	1	0
075	Infectious mononucleosis	435	Transient cerebral ischemia	0.849382	1	0
075	Infectious mononucleosis	437	Other and ill-defined cerebrovascular disease	1.06389	1	0
075	Infectious mononucleosis	440	Atherosclerosis	0.823375	1	0
075	Infectious mononucleosis	441	Aortic aneurysm and dissection	0.875292	1	0
075	Infectious mononucleosis	443	Other peripheral vascular disease	0.851241	1	0
075	Infectious mononucleosis	446	Polyarteritis nodosa and allied conditions	1.62186	1	0
075	Infectious mononucleosis	448	Disease of capillaries	0	1	0
075	Infectious mononucleosis	453	Other venous embolism and thrombosis	1.04905	1	0
075	Infectious mononucleosis	457	Noninfectious disorders of lymphatic channels	0	1	0
075	Infectious mononucleosis	477	Allergic rhinitis	5.51581	5.51581	1.70762
075	Infectious mononucleosis	480	Viral pneumonia	14.2681	14.2681	2.65803
075	Infectious mononucleosis	482	Other bacterial pneumonia	1.89746	1.89746	0.640515
075	Infectious mononucleosis	492	Emphysema	1.42155	1	0
075	Infectious mononucleosis	493	Asthma	1.71039	1.71039	0.536719
075	Infectious mononucleosis	496	Chronic airway obstruction, not elsewhere classified	1.22241	1.22241	0.200821
075	Infectious mononucleosis	503	Pneumoconiosis due to other inorganic dust	0	1	0
075	Infectious mononucleosis	512	Pneumothorax	0.697011	1	0
075	Infectious mononucleosis	515	Postinflammatory pulmonary fibrosis	1.59825	1	0
075	Infectious mononucleosis	518	Other diseases of lung	1.24817	1	0
075	Infectious mononucleosis	520	Disorders of tooth development and eruption	0	1	0
075	Infectious mononucleosis	523	Gingival and periodontal diseases	1.55052	1	0
075	Infectious mononucleosis	526	Diseases of the jaws	0	1	0
075	Infectious mononucleosis	555	Regional enteritis	1.654	1	0
075	Infectious mononucleosis	569	Other disorders of intestine	1.36648	1	0
075	Infectious mononucleosis	571	Chronic liver disease and cirrhosis	2.99249	2.99249	1.09611
075	Infectious mononucleosis	572	Liver abscess and sequelae of chronic liver disease	2.6586	2.6586	0.977798
075	Infectious mononucleosis	574	Cholelithiasis	1.56872	1.56872	0.450257
075	Infectious mononucleosis	576	Other disorders of biliary tract	1.76146	1	0
075	Infectious mononucleosis	577	Diseases of pancreas	1.10302	1	0
075	Infectious mononucleosis	579	Intestinal malabsorption	2.11247	1	0
075	Infectious mononucleosis	581	Nephrotic syndrome	1.73697	1	0
075	Infectious mononucleosis	583	Nephritis and nephropathy, not specified as acute or chronic	1.07927	1	0
075	Infectious mononucleosis	586	Renal failure, unspecified	1.19765	1	0
075	Infectious mononucleosis	587	Renal sclerosis, unspecified	0	1	0
075	Infectious mononucleosis	588	Disorders resulting from impaired renal function	1.28274	1	0
075	Infectious mononucleosis	592	Calculus of kidney and ureter	1.35509	1	0
075	Infectious mononucleosis	593	Other disorders of kidney and ureter	1.3024	1	0
075	Infectious mononucleosis	599	Other disorders of urethra and urinary tract	1.35587	1.35587	0.304442
075	Infectious mononucleosis	606	Infertility, male	0	1	0
075	Infectious mononucleosis	623	Noninflammatory disorders of vagina	0	1	0
075	Infectious mononucleosis	628	Infertility, female	0	1	0
075	Infectious mononucleosis	641	Antepartum hemorrhage, abruptio placentae, and placenta previa	0	1	0
075	Infectious mononucleosis	642	Hypertension complicating pregnancy, childbirth, and the puerperium	0	1	0
075	Infectious mononucleosis	648	Other current conditions in the mother classifiable elsewhere, but complicating pregnancy, childbirth, or the puerperium	0	1	0
075	Infectious mononucleosis	686	Other local infections of skin and subcutaneous tissue	1.4886	1	0
075	Infectious mononucleosis	690	Erythematosquamous dermatosis	7.04753	7.04753	1.95268
075	Infectious mononucleosis	692	Contact dermatitis and other eczema	2.90356	2.90356	1.06594
075	Infectious mononucleosis	695	Erythematous conditions	6.53614	6.53614	1.87735
075	Infectious mononucleosis	696	Psoriasis and similar disorders	0	1	0
075	Infectious mononucleosis	701	Other hypertrophic and atrophic conditions of skin	1.00561	1	0
075	Infectious mononucleosis	702	Other dermatoses	0	1	0
075	Infectious mononucleosis	703	Diseases of nail	2.20547	1	0
075	Infectious mononucleosis	704	Diseases of hair and hair follicles	0	1	0
075	Infectious mononucleosis	706	Diseases of sebaceous glands	0.923259	1	0
075	Infectious mononucleosis	708	Urticaria	3.8921	3.8921	1.35895
075	Infectious mononucleosis	709	Other disorders of skin and subcutaneous tissue	1.33253	1	0
075	Infectious mononucleosis	710	Diffuse diseases of connective tissue	0.612331	1	0
075	Infectious mononucleosis	714	Rheumatoid arthritis and other inflammatory polyarthropathies	1.2489	1	0
075	Infectious mononucleosis	715	Osteoarthrosis and allied disorders	1.1838	1	0
075	Infectious mononucleosis	716	Other and unspecified arthropathies	1.89133	1.89133	0.637278
075	Infectious mononucleosis	718	Other derangement of joint	1.72544	1	0
075	Infectious mononucleosis	720	Ankylosing spondylitis and other inflammatory spondylopathies	2.24645	1	0
075	Infectious mononucleosis	722	Intervertebral disc disorders	1.80295	1.80295	0.589426
075	Infectious mononucleosis	723	Other disorders of cervical region	0.700542	1	0
075	Infectious mononucleosis	724	Other and unspecified disorders of back	1.58243	1.58243	0.458964
075	Infectious mononucleosis	726	Peripheral enthesopathies and allied syndromes	2.12407	2.12407	0.753333
075	Infectious mononucleosis	727	Other disorders of synovium, tendon, and bursa	1.00424	1	0
075	Infectious mononucleosis	728	Disorders of muscle, ligament, and fascia	1.6026	1	0
075	Infectious mononucleosis	729	Other disorders of soft tissues	2.27529	2.27529	0.822106
075	Infectious mononucleosis	731	Osteitis deformans and osteopathies associated with other disorders classified elsewhere	1.39359	1	0
075	Infectious mononucleosis	733	Other disorders of bone and cartilage	0.898844	1	0
075	Infectious mononucleosis	741	Spina bifida	0	1	0
075	Infectious mononucleosis	742	Other congenital anomalies of nervous system	0	1	0
075	Infectious mononucleosis	743	Congenital anomalies of eye	0	1	0
075	Infectious mononucleosis	744	Congenital anomalies of ear, face, and neck	0	1	0
075	Infectious mononucleosis	745	Bulbus cordis anomalies and anomalies of cardiac septal closure	4.97948	1	0
075	Infectious mononucleosis	746	Other congenital anomalies of heart	0	1	0
075	Infectious mononucleosis	747	Other congenital anomalies of circulatory system	0	1	0
075	Infectious mononucleosis	749	Cleft palate and cleft lip	0	1	0
075	Infectious mononucleosis	750	Other congenital anomalies of upper alimentary tract	0	1	0
075	Infectious mononucleosis	751	Other congenital anomalies of digestive system	3.12401	1	0
075	Infectious mononucleosis	752	Congenital anomalies of genital organs	2.39681	1	0
075	Infectious mononucleosis	753	Congenital anomalies of urinary system	3.94039	3.94039	1.37128
075	Infectious mononucleosis	754	Certain congenital musculoskeletal deformities	0	1	0
075	Infectious mononucleosis	755	Other congenital anomalies of limbs	0	1	0
075	Infectious mononucleosis	756	Other congenital musculoskeletal anomalies	2.10043	1	0
075	Infectious mononucleosis	757	Congenital anomalies of the integument	6.48612	1	0
075	Infectious mononucleosis	758	Chromosomal anomalies	0	1	0
075	Infectious mononucleosis	759	Other and unspecified congenital anomalies	8.97508	8.97508	2.19445
075	Infectious mononucleosis	762	Fetus or newborn affected by complications of placenta, cord, and membranes	0	1	0
075	Infectious mononucleosis	763	Fetus or newborn affected by other complications of labor and delivery	0	1	0
075	Infectious mononucleosis	764	Slow fetal growth and fetal malnutrition	0	1	0
075	Infectious mononucleosis	774	Other perinatal jaundice	0	1	0
075	Infectious mononucleosis	780	General symptoms	2.06875	2.06875	0.726943
075	Infectious mononucleosis	781	Symptoms involving nervous and musculoskeletal systems	0.857286	1	0
075	Infectious mononucleosis	782	Symptoms involving skin and other integumentary tissue	2.26433	2.26433	0.817279
075	Infectious mononucleosis	783	Symptoms concerning nutrition, metabolism, and development	2.42455	2.42455	0.885646
075	Infectious mononucleosis	784	Symptoms involving head and neck	1.15379	1	0
075	Infectious mononucleosis	786	Symptoms involving respiratory system and other chest symptoms	1.36513	1.36513	0.311253
075	Infectious mononucleosis	787	Symptoms involving digestive system	1.38612	1	0
075	Infectious mononucleosis	788	Symptoms involving urinary system	0.961674	1	0
075	Infectious mononucleosis	790	Nonspecific findings on examination of blood	3.22835	3.22835	1.17197
075	Infectious mononucleosis	791	Nonspecific findings on examination of urine	1.63202	1	0
075	Infectious mononucleosis	795	Other and nonspecific abnormal cytological, histological, immunological and DNA test findings	5.18255	5.18255	1.6453
075	Infectious mononucleosis	798	Sudden death, cause unknown	0	1	0
075	Infectious mononucleosis	974	Poisoning by water, mineral, and uric acid metabolism drugs	4.45289	1	0
075	Infectious mononucleosis	982	Toxic effect of solvents other than petroleum based	0	1	0
075	Infectious mononucleosis	984	Toxic effect of lead and its compounds (including fumes)	0	1	0
075	Infectious mononucleosis	995	Certain adverse effects not elsewhere classified	1.7309	1	0
075	Infectious mononucleosis	996	Complications peculiar to certain specified procedures	0.869103	1	0
142	Malignant neoplasm of major salivary glands	011	Pulmonary tuberculosis	0.721972	1	0
142	Malignant neoplasm of major salivary glands	027	Other zoonotic bacterial diseases	0	1	0
142	Malignant neoplasm of major salivary glands	030	Leprosy	0	1	0
142	Malignant neoplasm of major salivary glands	031	Diseases due to other mycobacteria	0	1	0
142	Malignant neoplasm of major salivary glands	041	Bacterial infection in conditions classified elsewhere and of unspecified site	0.845869	0.845869	-0.16739
142	Malignant neoplasm of major salivary glands	042	Human immunodeficiency virus [HIV] disease	2.86861	1	0
142	Malignant neoplasm of major salivary glands	046	Slow virus infection of central nervous system	0	1	0
142	Malignant neoplasm of major salivary glands	061	Dengue	0	1	0
142	Malignant neoplasm of major salivary glands	078	Other diseases due to viruses and Chlamydiae	0.860501	1	0
142	Malignant neoplasm of major salivary glands	079	Viral and chlamydial infection in conditions classified elsewhere and of unspecified site	0.335399	0.335399	-1.09243
142	Malignant neoplasm of major salivary glands	084	Malaria	0	1	0
142	Malignant neoplasm of major salivary glands	094	Neurosyphilis	1.13174	1	0
142	Malignant neoplasm of major salivary glands	117	Other mycoses	2.23114	1	0
142	Malignant neoplasm of major salivary glands	135	Sarcoidosis	1.74132	1	0
142	Malignant neoplasm of major salivary glands	143	Malignant neoplasm of gum	22.0769	22.0769	3.09453
142	Malignant neoplasm of major salivary glands	147	Malignant neoplasm of nasopharynx	31.3821	31.3821	3.44624
142	Malignant neoplasm of major salivary glands	150	Malignant neoplasm of esophagus	0.473552	1	0
142	Malignant neoplasm of major salivary glands	151	Malignant neoplasm of stomach	0.326207	1	0
142	Malignant neoplasm of major salivary glands	153	Malignant neoplasm of colon	0.620326	0.620326	-0.47751
142	Malignant neoplasm of major salivary glands	155	Malignant neoplasm of liver and intrahepatic bile ducts	1.2269	1	0
142	Malignant neoplasm of major salivary glands	157	Malignant neoplasm of pancreas	0.957265	1	0
142	Malignant neoplasm of major salivary glands	158	Malignant neoplasm of retroperitoneum and peritoneum	0	1	0
142	Malignant neoplasm of major salivary glands	161	Malignant neoplasm of larynx	3.33663	3.33663	1.20496
142	Malignant neoplasm of major salivary glands	162	Malignant neoplasm of trachea, bronchus, and lung	1.56922	1.56922	0.450576
142	Malignant neoplasm of major salivary glands	163	Malignant neoplasm of pleura	1.08655	1	0
142	Malignant neoplasm of major salivary glands	164	Malignant neoplasm of thymus, heart, and mediastinum	1.44856	1	0
142	Malignant neoplasm of major salivary glands	170	Malignant neoplasm of bone and articular cartilage	24.375	24.375	3.19356
142	Malignant neoplasm of major salivary glands	171	Malignant neoplasm of connective and other soft tissue	20.8525	20.8525	3.03747
142	Malignant neoplasm of major salivary glands	172	Malignant melanoma of skin	6.93305	6.93305	1.9363
142	Malignant neoplasm of major salivary glands	173	Other malignant neoplasm of skin	23.7111	23.7111	3.16595
142	Malignant neoplasm of major salivary glands	174	Malignant neoplasm of female breast	0.368899	0.368899	-0.997232
142	Malignant neoplasm of major salivary glands	176	Kaposi's sarcoma	3.66563	1	0
142	Malignant neoplasm of major salivary glands	182	Malignant neoplasm of body of uterus	0.496937	1	0
142	Malignant neoplasm of major salivary glands	183	Malignant neoplasm of ovary and other uterine adnexa	0.30303	1	0
142	Malignant neoplasm of major salivary glands	185	Malignant neoplasm of prostate	0.915185	1	0
142	Malignant neoplasm of major salivary glands	186	Malignant neoplasm of testis	6.95637	1	0
142	Malignant neoplasm of major salivary glands	188	Malignant neoplasm of bladder	0.751903	1	0
142	Malignant neoplasm of major salivary glands	189	Malignant neoplasm of kidney and other and unspecified urinary organs	0.917342	1	0
142	Malignant neoplasm of major salivary glands	190	Malignant neoplasm of eye	8.06536	8.06536	2.08758
142	Malignant neoplasm of major salivary glands	191	Malignant neoplasm of brain	2.16856	1	0
142	Malignant neoplasm of major salivary glands	192	Malignant neoplasm of other and unspecified parts of nervous system	18.3282	18.3282	2.90844
142	Malignant neoplasm of major salivary glands	193	Malignant neoplasm of thyroid gland	1.42545	1	0
142	Malignant neoplasm of major salivary glands	194	Malignant neoplasm of other endocrine glands and related structures	10.9249	10.9249	2.39105
142	Malignant neoplasm of major salivary glands	199	Malignant neoplasm without specification of site	7.11768	7.11768	1.96258
142	Malignant neoplasm of major salivary glands	200	Lymphosarcoma and reticulosarcoma and other specified malignant tumors of lymphatic tissue	2.86348	2.86348	1.05204
142	Malignant neoplasm of major salivary glands	201	Hodgkin's disease	3.1271	1	0
142	Malignant neoplasm of major salivary glands	202	Other malignant neoplasms of lymphoid and histiocytic tissue	3.70299	3.70299	1.30914
142	Malignant neoplasm of major salivary glands	203	Multiple myeloma and immunoproliferative neoplasms	0.856019	1	0
142	Malignant neoplasm of major salivary glands	204	Lymphoid leukemia	2.88609	2.88609	1.0599
142	Malignant neoplasm of major salivary glands	205	Myeloid leukemia	1.30664	1	0
142	Malignant neoplasm of major salivary glands	207	Other specified leukemia	5.27725	1	0
142	Malignant neoplasm of major salivary glands	208	Leukemia of unspecified cell type	2.00603	1	0
142	Malignant neoplasm of major salivary glands	210	Benign neoplasm of lip, oral cavity, and pharynx	28.2416	28.2416	3.3408
142	Malignant neoplasm of major salivary glands	211	Benign neoplasm of other parts of digestive system	0.571201	0.571201	-0.560014
142	Malignant neoplasm of major salivary glands	213	Benign neoplasm of bone and articular cartilage	1.34011	1	0
142	Malignant neoplasm of major salivary glands	214	Lipoma	0.812986	1	0
142	Malignant neoplasm of major salivary glands	215	Other benign neoplasm of connective and other soft tissue	3.67076	3.67076	1.3004
142	Malignant neoplasm of major salivary glands	216	Benign neoplasm of skin	11.3697	11.3697	2.43096
142	Malignant neoplasm of major salivary glands	217	Benign neoplasm of breast	0.507007	1	0
142	Malignant neoplasm of major salivary glands	218	Uterine leiomyoma	0.44729	1	0
142	Malignant neoplasm of major salivary glands	227	Benign neoplasm of other endocrine glands and related structures	1.22893	1	0
142	Malignant neoplasm of major salivary glands	228	Hemangioma and lymphangioma, any site	1.18388	1	0
142	Malignant neoplasm of major salivary glands	231	Carcinoma in situ of respiratory system	3.56945	1	0
142	Malignant neoplasm of major salivary glands	235	Neoplasm of uncertain behavior of digestive and respiratory systems	2.99144	2.99144	1.09575
142	Malignant neoplasm of major salivary glands	236	Neoplasm of uncertain behavior of genitourinary organs	1.73949	1	0
142	Malignant neoplasm of major salivary glands	237	Neoplasm of uncertain behavior of endocrine glands and nervous system	2.02033	1	0
142	Malignant neoplasm of major salivary glands	238	Neoplasm of uncertain behavior of other and unspecified sites and tissues	1.70742	1.70742	0.534986
142	Malignant neoplasm of major salivary glands	239	Neoplasms of unspecified nature	4.52249	4.52249	1.50906
142	Malignant neoplasm of major salivary glands	240	Simple and unspecified goiter	0.952927	1	0
142	Malignant neoplasm of major salivary glands	242	Thyrotoxicosis with or without goiter	0.480512	1	0
142	Malignant neoplasm of major salivary glands	243	Congenital hypothyroidism	0	1	0
142	Malignant neoplasm of major salivary glands	244	Acquired hypothyroidism	0.857705	1	0
142	Malignant neoplasm of major salivary glands	245	Thyroiditis	2.39339	1	0
142	Malignant neoplasm of major salivary glands	246	Other disorders of thyroid	0.36993	1	0
142	Malignant neoplasm of major salivary glands	250	Diabetes mellitus	0.777098	0.777098	-0.252189
142	Malignant neoplasm of major salivary glands	251	Other disorders of pancreatic internal secretion	0.683405	1	0
142	Malignant neoplasm of major salivary glands	252	Disorders of parathyroid gland	1.17295	1	0
142	Malignant neoplasm of major salivary glands	253	Disorders of the pituitary gland and its hypothalamic control	1.47606	1	0
142	Malignant neoplasm of major salivary glands	255	Disorders of adrenal glands	0.985968	1	0
142	Malignant neoplasm of major salivary glands	256	Ovarian dysfunction	0	1	0
142	Malignant neoplasm of major salivary glands	257	Testicular dysfunction	0	1	0
142	Malignant neoplasm of major salivary glands	258	Polyglandular dysfunction and related disorders	0	1	0
142	Malignant neoplasm of major salivary glands	259	Other endocrine disorders	0	1	0
142	Malignant neoplasm of major salivary glands	260	Kwashiorkor	1.96475	1	0
142	Malignant neoplasm of major salivary glands	264	Vitamin A deficiency	0	1	0
142	Malignant neoplasm of major salivary glands	265	Thiamine and niacin deficiency states	0	1	0
142	Malignant neoplasm of major salivary glands	266	Deficiency of B-complex components	0.575163	1	0
142	Malignant neoplasm of major salivary glands	267	Ascorbic acid deficiency	0	1	0
142	Malignant neoplasm of major salivary glands	268	Vitamin D deficiency	0	1	0
142	Malignant neoplasm of major salivary glands	269	Other nutritional deficiencies	1.61577	1	0
142	Malignant neoplasm of major salivary glands	270	Disorders of amino-acid transport and metabolism	3.00816	1	0
142	Malignant neoplasm of major salivary glands	271	Disorders of carbohydrate transport and metabolism	0.506364	1	0
142	Malignant neoplasm of major salivary glands	272	Disorders of lipoid metabolism	0.559255	0.559255	-0.58115
142	Malignant neoplasm of major salivary glands	273	Disorders of plasma protein metabolism	0.898426	1	0
142	Malignant neoplasm of major salivary glands	274	Gout	1.11916	1	0
142	Malignant neoplasm of major salivary glands	275	Disorders of mineral metabolism	1.5954	1.5954	0.467123
142	Malignant neoplasm of major salivary glands	276	Disorders of fluid, electrolyte, and acid-base balance	0.944687	1	0
142	Malignant neoplasm of major salivary glands	277	Other and unspecified disorders of metabolism	1.11657	1	0
142	Malignant neoplasm of major salivary glands	278	Overweight, obesity and other hyperalimentation	0.557951	0.557951	-0.583485
142	Malignant neoplasm of major salivary glands	279	Disorders involving the immune mechanism	1.88845	1	0
142	Malignant neoplasm of major salivary glands	280	Iron deficiency anemias	0.729481	0.729481	-0.315422
142	Malignant neoplasm of major salivary glands	281	Other deficiency anemias	0.92704	1	0
142	Malignant neoplasm of major salivary glands	282	Hereditary hemolytic anemias	0.829531	1	0
142	Malignant neoplasm of major salivary glands	283	Acquired hemolytic anemias	1.48143	1	0
142	Malignant neoplasm of major salivary glands	284	Aplastic anemia and other bone marrow failure syndromes	2.42016	2.42016	0.883834
142	Malignant neoplasm of major salivary glands	285	Other and unspecified anemias	0.93119	1	0
142	Malignant neoplasm of major salivary glands	286	Coagulation defects	1.28719	1	0
142	Malignant neoplasm of major salivary glands	287	Purpura and other hemorrhagic conditions	1.30585	1	0
142	Malignant neoplasm of major salivary glands	288	Diseases of white blood cells	2.22736	2.22736	0.800819
142	Malignant neoplasm of major salivary glands	289	Other diseases of blood and blood-forming organs	1.15015	1	0
142	Malignant neoplasm of major salivary glands	290	Dementias	0.666664	0.666664	-0.405469
142	Malignant neoplasm of major salivary glands	291	Alcohol-induced mental disorders	0.863786	1	0
142	Malignant neoplasm of major salivary glands	294	Persistent mental disorders due to conditions classified elsewhere	0.67003	1	0
142	Malignant neoplasm of major salivary glands	295	Schizophrenic disorders	0.530186	1	0
142	Malignant neoplasm of major salivary glands	296	Episodic mood disorders	0.576639	0.576639	-0.550538
142	Malignant neoplasm of major salivary glands	299	Pervasive developmental disorders	0	1	0
142	Malignant neoplasm of major salivary glands	300	Anxiety, dissociative and somatoform disorders	0.574762	0.574762	-0.553799
142	Malignant neoplasm of major salivary glands	301	Personality disorders	0.405861	1	0
142	Malignant neoplasm of major salivary glands	302	Sexual and gender identity disorders	0	1	0
142	Malignant neoplasm of major salivary glands	303	Alcohol dependence syndrome	0.830626	1	0
142	Malignant neoplasm of major salivary glands	304	Drug dependence	0.896394	1	0
142	Malignant neoplasm of major salivary glands	307	Special symptoms or syndromes, not elsewhere classified	0.41372	1	0
142	Malignant neoplasm of major salivary glands	311	Depressive disorder, not elsewhere classified	0.864833	1	0
142	Malignant neoplasm of major salivary glands	314	Hyperkinetic syndrome of childhood	0	1	0
142	Malignant neoplasm of major salivary glands	319	Unspecified mental retardation	0.218973	1	0
142	Malignant neoplasm of major salivary glands	322	Meningitis of unspecified cause	0.96662	1	0
142	Malignant neoplasm of major salivary glands	323	Encephalitis, myelitis, and encephalomyelitis	1.54158	1	0
142	Malignant neoplasm of major salivary glands	327	Organic sleep disorders	0	1	0
142	Malignant neoplasm of major salivary glands	330	Cerebral degenerations usually manifest in childhood	0	1	0
142	Malignant neoplasm of major salivary glands	331	Other cerebral degenerations	0.516808	0.516808	-0.660085
142	Malignant neoplasm of major salivary glands	332	Parkinson's disease	0.550123	0.550123	-0.597614
142	Malignant neoplasm of major salivary glands	333	Other extrapyramidal disease and abnormal movement disorders	0.852885	1	0
142	Malignant neoplasm of major salivary glands	334	Spinocerebellar disease	0.6058	1	0
142	Malignant neoplasm of major salivary glands	335	Anterior horn cell disease	1.69199	1	0
142	Malignant neoplasm of major salivary glands	337	Disorders of the autonomic nervous system	1.0724	1	0
142	Malignant neoplasm of major salivary glands	340	Multiple sclerosis	0.750105	1	0
142	Malignant neoplasm of major salivary glands	341	Other demyelinating diseases of central nervous system	0	1	0
142	Malignant neoplasm of major salivary glands	342	Hemiplegia and hemiparesis	0.737744	0.737744	-0.304158
142	Malignant neoplasm of major salivary glands	345	Epilepsy and recurrent seizures	0.695499	1	0
142	Malignant neoplasm of major salivary glands	346	Migraine	1.01187	1	0
142	Malignant neoplasm of major salivary glands	347	Cataplexy and narcolepsy	0	1	0
142	Malignant neoplasm of major salivary glands	348	Other conditions of brain	0.956311	1	0
142	Malignant neoplasm of major salivary glands	349	Other and unspecified disorders of the nervous system	0.727918	1	0
142	Malignant neoplasm of major salivary glands	351	Facial nerve disorders	38.6462	38.6462	3.65445
142	Malignant neoplasm of major salivary glands	354	Mononeuritis of upper limb and mononeuritis multiplex	1.01223	1	0
142	Malignant neoplasm of major salivary glands	355	Mononeuritis of lower limb	0.98669	1	0
142	Malignant neoplasm of major salivary glands	356	Hereditary and idiopathic peripheral neuropathy	0.95825	1	0
142	Malignant neoplasm of major salivary glands	358	Myoneural disorders	1.28282	1	0
142	Malignant neoplasm of major salivary glands	359	Muscular dystrophies and other myopathies	1.76568	1	0
142	Malignant neoplasm of major salivary glands	361	Retinal detachments and defects	0.768526	1	0
142	Malignant neoplasm of major salivary glands	362	Other retinal disorders	0.516235	0.516235	-0.661194
142	Malignant neoplasm of major salivary glands	363	Chorioretinal inflammations, scars, and other disorders of choroid	0.513989	1	0
142	Malignant neoplasm of major salivary glands	365	Glaucoma	0.813677	1	0
142	Malignant neoplasm of major salivary glands	366	Cataract	0.886463	1	0
142	Malignant neoplasm of major salivary glands	368	Visual disturbances	0.613387	1	0
142	Malignant neoplasm of major salivary glands	370	Keratitis	7.01148	7.01148	1.94755
142	Malignant neoplasm of major salivary glands	371	Corneal opacity and other disorders of cornea	1.89271	1	0
142	Malignant neoplasm of major salivary glands	374	Other disorders of eyelids	25.7501	25.7501	3.24844
142	Malignant neoplasm of major salivary glands	377	Disorders of optic nerve and visual pathways	0.792749	1	0
142	Malignant neoplasm of major salivary glands	378	Strabismus and other disorders of binocular eye movements	1.38655	1	0
142	Malignant neoplasm of major salivary glands	386	Vertiginous syndromes and other disorders of vestibular system	0.370052	0.370052	-0.994111
142	Malignant neoplasm of major salivary glands	389	Hearing loss	1.60546	1.60546	0.473408
142	Malignant neoplasm of major salivary glands	401	Essential hypertension	0.998691	1	0
142	Malignant neoplasm of major salivary glands	403	Hypertensive chronic kidney disease	0.712827	1	0
142	Malignant neoplasm of major salivary glands	405	Secondary hypertension	0.615402	1	0
142	Malignant neoplasm of major salivary glands	410	Acute myocardial infarction	0.503193	0.503193	-0.686782
142	Malignant neoplasm of major salivary glands	414	Other forms of chronic ischemic heart disease	0.734022	0.734022	-0.309216
142	Malignant neoplasm of major salivary glands	416	Chronic pulmonary heart disease	0.619786	0.619786	-0.478381
142	Malignant neoplasm of major salivary glands	425	Cardiomyopathy	0.655699	0.655699	-0.422054
142	Malignant neoplasm of major salivary glands	426	Conduction disorders	0.862296	1	0
142	Malignant neoplasm of major salivary glands	427	Cardiac dysrhythmias	0.854522	0.854522	-0.157213
142	Malignant neoplasm of major salivary glands	428	Heart failure	0.692648	0.692648	-0.367233
142	Malignant neoplasm of major salivary glands	434	Occlusion of cerebral arteries	0.644225	0.644225	-0.439707
142	Malignant neoplasm of major salivary glands	435	Transient cerebral ischemia	0.619577	0.619577	-0.478718
142	Malignant neoplasm of major salivary glands	437	Other and ill-defined cerebrovascular disease	0.625671	0.625671	-0.468931
142	Malignant neoplasm of major salivary glands	440	Atherosclerosis	0.776894	0.776894	-0.252451
142	Malignant neoplasm of major salivary glands	441	Aortic aneurysm and dissection	0.85341	1	0
142	Malignant neoplasm of major salivary glands	443	Other peripheral vascular disease	0.826544	1	0
142	Malignant neoplasm of major salivary glands	446	Polyarteritis nodosa and allied conditions	0.878506	1	0
142	Malignant neoplasm of major salivary glands	448	Disease of capillaries	0.524829	1	0
142	Malignant neoplasm of major salivary glands	453	Other venous embolism and thrombosis	0.808159	1	0
142	Malignant neoplasm of major salivary glands	457	Noninfectious disorders of lymphatic channels	1.51942	1	0
142	Malignant neoplasm of major salivary glands	477	Allergic rhinitis	0.341455	1	0
142	Malignant neoplasm of major salivary glands	480	Viral pneumonia	0.294421	1	0
142	Malignant neoplasm of major salivary glands	482	Other bacterial pneumonia	0.952058	1	0
142	Malignant neoplasm of major salivary glands	492	Emphysema	1.15709	1	0
142	Malignant neoplasm of major salivary glands	493	Asthma	0.582346	0.582346	-0.540691
142	Malignant neoplasm of major salivary glands	496	Chronic airway obstruction, not elsewhere classified	1.11526	1.11526	0.109089
142	Malignant neoplasm of major salivary glands	503	Pneumoconiosis due to other inorganic dust	0	1	0
142	Malignant neoplasm of major salivary glands	512	Pneumothorax	0.956454	1	0
142	Malignant neoplasm of major salivary glands	515	Postinflammatory pulmonary fibrosis	1.1333	1	0
142	Malignant neoplasm of major salivary glands	516	Other alveolar and parietoalveolar pneumonopathy	0.739662	1	0
142	Malignant neoplasm of major salivary glands	518	Other diseases of lung	0.881099	1	0
142	Malignant neoplasm of major salivary glands	520	Disorders of tooth development and eruption	8.15489	8.15489	2.09862
142	Malignant neoplasm of major salivary glands	523	Gingival and periodontal diseases	5.71108	5.71108	1.74241
142	Malignant neoplasm of major salivary glands	526	Diseases of the jaws	11.3874	11.3874	2.4325
142	Malignant neoplasm of major salivary glands	528	Diseases of the oral soft tissues, excluding lesions specific for gingiva and tongue	11.1703	11.1703	2.41326
142	Malignant neoplasm of major salivary glands	555	Regional enteritis	0.597276	1	0
142	Malignant neoplasm of major salivary glands	569	Other disorders of intestine	0.666159	0.666159	-0.406227
142	Malignant neoplasm of major salivary glands	571	Chronic liver disease and cirrhosis	0.744429	1	0
142	Malignant neoplasm of major salivary glands	572	Liver abscess and sequelae of chronic liver disease	0.504025	1	0
142	Malignant neoplasm of major salivary glands	574	Cholelithiasis	0.462406	0.462406	-0.771311
142	Malignant neoplasm of major salivary glands	576	Other disorders of biliary tract	0.451042	0.451042	-0.796196
142	Malignant neoplasm of major salivary glands	577	Diseases of pancreas	0.605434	0.605434	-0.50181
142	Malignant neoplasm of major salivary glands	579	Intestinal malabsorption	0.915403	1	0
142	Malignant neoplasm of major salivary glands	581	Nephrotic syndrome	0.250896	1	0
142	Malignant neoplasm of major salivary glands	583	Nephritis and nephropathy, not specified as acute or chronic	0.584602	1	0
142	Malignant neoplasm of major salivary glands	586	Renal failure, unspecified	0.778475	1	0
142	Malignant neoplasm of major salivary glands	587	Renal sclerosis, unspecified	0	1	0
142	Malignant neoplasm of major salivary glands	588	Disorders resulting from impaired renal function	0.833779	1	0
142	Malignant neoplasm of major salivary glands	592	Calculus of kidney and ureter	0.642255	0.642255	-0.44277
142	Malignant neoplasm of major salivary glands	593	Other disorders of kidney and ureter	0.78385	1	0
142	Malignant neoplasm of major salivary glands	599	Other disorders of urethra and urinary tract	0.696483	0.696483	-0.361712
142	Malignant neoplasm of major salivary glands	606	Infertility, male	0	1	0
142	Malignant neoplasm of major salivary glands	623	Noninflammatory disorders of vagina	0.247638	1	0
142	Malignant neoplasm of major salivary glands	628	Infertility, female	0	1	0
142	Malignant neoplasm of major salivary glands	641	Antepartum hemorrhage, abruptio placentae, and placenta previa	0	1	0
142	Malignant neoplasm of major salivary glands	642	Hypertension complicating pregnancy, childbirth, and the puerperium	0	1	0
142	Malignant neoplasm of major salivary glands	648	Other current conditions in the mother classifiable elsewhere, but complicating pregnancy, childbirth, or the puerperium	0	1	0
142	Malignant neoplasm of major salivary glands	686	Other local infections of skin and subcutaneous tissue	2.41897	2.41897	0.883341
142	Malignant neoplasm of major salivary glands	690	Erythematosquamous dermatosis	1.90871	1	0
142	Malignant neoplasm of major salivary glands	692	Contact dermatitis and other eczema	1.60771	1	0
142	Malignant neoplasm of major salivary glands	695	Erythematous conditions	1.41616	1	0
142	Malignant neoplasm of major salivary glands	696	Psoriasis and similar disorders	0.899736	1	0
142	Malignant neoplasm of major salivary glands	701	Other hypertrophic and atrophic conditions of skin	3.05034	3.05034	1.11525
142	Malignant neoplasm of major salivary glands	702	Other dermatoses	9.43606	9.43606	2.24454
142	Malignant neoplasm of major salivary glands	703	Diseases of nail	0.637136	1	0
142	Malignant neoplasm of major salivary glands	704	Diseases of hair and hair follicles	0	1	0
142	Malignant neoplasm of major salivary glands	706	Diseases of sebaceous glands	2.00039	1	0
142	Malignant neoplasm of major salivary glands	708	Urticaria	0.843289	1	0
142	Malignant neoplasm of major salivary glands	709	Other disorders of skin and subcutaneous tissue	3.60893	3.60893	1.28341
142	Malignant neoplasm of major salivary glands	710	Diffuse diseases of connective tissue	0.995038	1	0
142	Malignant neoplasm of major salivary glands	714	Rheumatoid arthritis and other inflammatory polyarthropathies	0.716279	1	0
142	Malignant neoplasm of major salivary glands	715	Osteoarthrosis and allied disorders	0.564277	0.564277	-0.57221
142	Malignant neoplasm of major salivary glands	716	Other and unspecified arthropathies	0.967553	1	0
142	Malignant neoplasm of major salivary glands	718	Other derangement of joint	0.436154	1	0
142	Malignant neoplasm of major salivary glands	720	Ankylosing spondylitis and other inflammatory spondylopathies	0.730095	1	0
142	Malignant neoplasm of major salivary glands	722	Intervertebral disc disorders	0.425108	0.425108	-0.855411
142	Malignant neoplasm of major salivary glands	723	Other disorders of cervical region	1.06249	1	0
142	Malignant neoplasm of major salivary glands	724	Other and unspecified disorders of back	0.574292	0.574292	-0.554618
142	Malignant neoplasm of major salivary glands	726	Peripheral enthesopathies and allied syndromes	0.575269	1	0
142	Malignant neoplasm of major salivary glands	727	Other disorders of synovium, tendon, and bursa	0.435169	0.435169	-0.832022
142	Malignant neoplasm of major salivary glands	728	Disorders of muscle, ligament, and fascia	0.733043	1	0
142	Malignant neoplasm of major salivary glands	729	Other disorders of soft tissues	0.544871	0.544871	-0.607205
142	Malignant neoplasm of major salivary glands	731	Osteitis deformans and osteopathies associated with other disorders classified elsewhere	1.30842	1	0
142	Malignant neoplasm of major salivary glands	733	Other disorders of bone and cartilage	0.799498	0.799498	-0.223771
142	Malignant neoplasm of major salivary glands	741	Spina bifida	0	1	0
142	Malignant neoplasm of major salivary glands	742	Other congenital anomalies of nervous system	0.846227	1	0
142	Malignant neoplasm of major salivary glands	743	Congenital anomalies of eye	0	1	0
142	Malignant neoplasm of major salivary glands	744	Congenital anomalies of ear, face, and neck	17.8213	17.8213	2.88039
142	Malignant neoplasm of major salivary glands	745	Bulbus cordis anomalies and anomalies of cardiac septal closure	1.07889	1	0
142	Malignant neoplasm of major salivary glands	746	Other congenital anomalies of heart	0.885051	1	0
142	Malignant neoplasm of major salivary glands	747	Other congenital anomalies of circulatory system	1.12191	1	0
142	Malignant neoplasm of major salivary glands	749	Cleft palate and cleft lip	8.05474	1	0
142	Malignant neoplasm of major salivary glands	750	Other congenital anomalies of upper alimentary tract	0	1	0
142	Malignant neoplasm of major salivary glands	751	Other congenital anomalies of digestive system	0.676869	1	0
142	Malignant neoplasm of major salivary glands	752	Congenital anomalies of genital organs	0.519308	1	0
142	Malignant neoplasm of major salivary glands	753	Congenital anomalies of urinary system	0.533594	1	0
142	Malignant neoplasm of major salivary glands	754	Certain congenital musculoskeletal deformities	0	1	0
142	Malignant neoplasm of major salivary glands	755	Other congenital anomalies of limbs	0	1	0
142	Malignant neoplasm of major salivary glands	756	Other congenital musculoskeletal anomalies	0.303395	1	0
142	Malignant neoplasm of major salivary glands	757	Congenital anomalies of the integument	0	1	0
142	Malignant neoplasm of major salivary glands	758	Chromosomal anomalies	3.0126	1	0
142	Malignant neoplasm of major salivary glands	759	Other and unspecified congenital anomalies	1.9446	1	0
142	Malignant neoplasm of major salivary glands	762	Fetus or newborn affected by complications of placenta, cord, and membranes	0	1	0
142	Malignant neoplasm of major salivary glands	763	Fetus or newborn affected by other complications of labor and delivery	0	1	0
142	Malignant neoplasm of major salivary glands	764	Slow fetal growth and fetal malnutrition	0	1	0
142	Malignant neoplasm of major salivary glands	774	Other perinatal jaundice	0	1	0
142	Malignant neoplasm of major salivary glands	780	General symptoms	0.778174	0.778174	-0.250805
142	Malignant neoplasm of major salivary glands	781	Symptoms involving nervous and musculoskeletal systems	0.78013	1	0
142	Malignant neoplasm of major salivary glands	782	Symptoms involving skin and other integumentary tissue	0.919884	1	0
142	Malignant neoplasm of major salivary glands	783	Symptoms concerning nutrition, metabolism, and development	1.63433	1.63433	0.491231
142	Malignant neoplasm of major salivary glands	784	Symptoms involving head and neck	1.08328	1	0
142	Malignant neoplasm of major salivary glands	786	Symptoms involving respiratory system and other chest symptoms	0.675586	0.675586	-0.392174
142	Malignant neoplasm of major salivary glands	787	Symptoms involving digestive system	1.66334	1.66334	0.508828
142	Malignant neoplasm of major salivary glands	788	Symptoms involving urinary system	1.12516	1	0
142	Malignant neoplasm of major salivary glands	790	Nonspecific findings on examination of blood	0.780574	1	0
142	Malignant neoplasm of major salivary glands	791	Nonspecific findings on examination of urine	0.353605	1	0
142	Malignant neoplasm of major salivary glands	795	Other and nonspecific abnormal cytological, histological, immunological and DNA test findings	1.12289	1	0
142	Malignant neoplasm of major salivary glands	798	Sudden death, cause unknown	0	1	0
142	Malignant neoplasm of major salivary glands	974	Poisoning by water, mineral, and uric acid metabolism drugs	1.44719	1	0
142	Malignant neoplasm of major salivary glands	982	Toxic effect of solvents other than petroleum based	0	1	0
142	Malignant neoplasm of major salivary glands	984	Toxic effect of lead and its compounds (including fumes)	22.5059	22.5059	3.11378
142	Malignant neoplasm of major salivary glands	995	Certain adverse effects not elsewhere classified	0.61612	1	0
142	Malignant neoplasm of major salivary glands	996	Complications peculiar to certain specified procedures	0.941528	1	0
147	Malignant neoplasm of nasopharynx	011	Pulmonary tuberculosis	1.05113	1	0
147	Malignant neoplasm of nasopharynx	027	Other zoonotic bacterial diseases	0	1	0
147	Malignant neoplasm of nasopharynx	030	Leprosy	0	1	0
147	Malignant neoplasm of nasopharynx	031	Diseases due to other mycobacteria	0	1	0
147	Malignant neoplasm of nasopharynx	041	Bacterial infection in conditions classified elsewhere and of unspecified site	1.20268	1	0
147	Malignant neoplasm of nasopharynx	042	Human immunodeficiency virus [HIV] disease	8.35288	1	0
147	Malignant neoplasm of nasopharynx	046	Slow virus infection of central nervous system	0	1	0
147	Malignant neoplasm of nasopharynx	061	Dengue	0	1	0
147	Malignant neoplasm of nasopharynx	078	Other diseases due to viruses and Chlamydiae	1.25281	1	0
147	Malignant neoplasm of nasopharynx	079	Viral and chlamydial infection in conditions classified elsewhere and of unspecified site	0.697588	1	0
147	Malignant neoplasm of nasopharynx	084	Malaria	0	1	0
147	Malignant neoplasm of nasopharynx	094	Neurosyphilis	0	1	0
147	Malignant neoplasm of nasopharynx	117	Other mycoses	3.71239	3.71239	1.31168
147	Malignant neoplasm of nasopharynx	135	Sarcoidosis	0	1	0
147	Malignant neoplasm of nasopharynx	143	Malignant neoplasm of gum	36.7337	36.7337	3.6037
147	Malignant neoplasm of nasopharynx	150	Malignant neoplasm of esophagus	11.0312	11.0312	2.40073
147	Malignant neoplasm of nasopharynx	151	Malignant neoplasm of stomach	1.89972	1	0
147	Malignant neoplasm of nasopharynx	153	Malignant neoplasm of colon	0.738933	1	0
147	Malignant neoplasm of nasopharynx	155	Malignant neoplasm of liver and intrahepatic bile ducts	1.78626	1	0
147	Malignant neoplasm of nasopharynx	157	Malignant neoplasm of pancreas	2.16797	1	0
147	Malignant neoplasm of nasopharynx	158	Malignant neoplasm of retroperitoneum and peritoneum	0	1	0
147	Malignant neoplasm of nasopharynx	161	Malignant neoplasm of larynx	34.3288	34.3288	3.53598
147	Malignant neoplasm of nasopharynx	162	Malignant neoplasm of trachea, bronchus, and lung	2.73261	2.73261	1.00526
147	Malignant neoplasm of nasopharynx	163	Malignant neoplasm of pleura	9.4915	9.4915	2.2504
147	Malignant neoplasm of nasopharynx	164	Malignant neoplasm of thymus, heart, and mediastinum	4.21795	1	0
147	Malignant neoplasm of nasopharynx	170	Malignant neoplasm of bone and articular cartilage	42.2474	42.2474	3.74354
147	Malignant neoplasm of nasopharynx	171	Malignant neoplasm of connective and other soft tissue	10.1198	10.1198	2.3145
147	Malignant neoplasm of nasopharynx	172	Malignant melanoma of skin	4.03756	4.03756	1.39564
147	Malignant neoplasm of nasopharynx	173	Other malignant neoplasm of skin	4.56138	4.56138	1.51763
147	Malignant neoplasm of nasopharynx	174	Malignant neoplasm of female breast	1.17812	1	0
147	Malignant neoplasm of nasopharynx	176	Kaposi's sarcoma	0	1	0
147	Malignant neoplasm of nasopharynx	182	Malignant neoplasm of body of uterus	0.803886	1	0
147	Malignant neoplasm of nasopharynx	183	Malignant neoplasm of ovary and other uterine adnexa	0.294123	1	0
147	Malignant neoplasm of nasopharynx	185	Malignant neoplasm of prostate	0.761388	1	0
147	Malignant neoplasm of nasopharynx	186	Malignant neoplasm of testis	0	1	0
147	Malignant neoplasm of nasopharynx	188	Malignant neoplasm of bladder	0.405446	1	0
147	Malignant neoplasm of nasopharynx	189	Malignant neoplasm of kidney and other and unspecified urinary organs	0.534228	1	0
147	Malignant neoplasm of nasopharynx	190	Malignant neoplasm of eye	26.4205	26.4205	3.27414
147	Malignant neoplasm of nasopharynx	191	Malignant neoplasm of brain	8.41929	8.41929	2.13053
147	Malignant neoplasm of nasopharynx	192	Malignant neoplasm of other and unspecified parts of nervous system	0	1	0
147	Malignant neoplasm of nasopharynx	193	Malignant neoplasm of thyroid gland	2.07533	1	0
147	Malignant neoplasm of nasopharynx	194	Malignant neoplasm of other endocrine glands and related structures	15.9057	15.9057	2.76668
147	Malignant neoplasm of nasopharynx	199	Malignant neoplasm without specification of site	12.4643	12.4643	2.52286
147	Malignant neoplasm of nasopharynx	200	Lymphosarcoma and reticulosarcoma and other specified malignant tumors of lymphatic tissue	3.03199	3.03199	1.10922
147	Malignant neoplasm of nasopharynx	201	Hodgkin's disease	5.46334	5.46334	1.69806
147	Malignant neoplasm of nasopharynx	202	Other malignant neoplasms of lymphoid and histiocytic tissue	3.43078	3.43078	1.23279
147	Malignant neoplasm of nasopharynx	203	Multiple myeloma and immunoproliferative neoplasms	0.311572	1	0
147	Malignant neoplasm of nasopharynx	204	Lymphoid leukemia	0.614911	1	0
147	Malignant neoplasm of nasopharynx	205	Myeloid leukemia	1.26823	1	0
147	Malignant neoplasm of nasopharynx	207	Other specified leukemia	0	1	0
147	Malignant neoplasm of nasopharynx	208	Leukemia of unspecified cell type	1.16824	1	0
147	Malignant neoplasm of nasopharynx	210	Benign neoplasm of lip, oral cavity, and pharynx	5.67135	5.67135	1.73543
147	Malignant neoplasm of nasopharynx	211	Benign neoplasm of other parts of digestive system	0.567935	1	0
147	Malignant neoplasm of nasopharynx	213	Benign neoplasm of bone and articular cartilage	1.95108	1	0
147	Malignant neoplasm of nasopharynx	214	Lipoma	1.05212	1	0
147	Malignant neoplasm of nasopharynx	215	Other benign neoplasm of connective and other soft tissue	5.34431	5.34431	1.67603
147	Malignant neoplasm of nasopharynx	216	Benign neoplasm of skin	1.94745	1	0
147	Malignant neoplasm of nasopharynx	218	Uterine leiomyoma	0.651214	1	0
147	Malignant neoplasm of nasopharynx	227	Benign neoplasm of other endocrine glands and related structures	0.894607	1	0
147	Malignant neoplasm of nasopharynx	228	Hemangioma and lymphangioma, any site	1.3789	1	0
147	Malignant neoplasm of nasopharynx	231	Carcinoma in situ of respiratory system	31.1808	31.1808	3.4398
147	Malignant neoplasm of nasopharynx	235	Neoplasm of uncertain behavior of digestive and respiratory systems	1.36102	1	0
147	Malignant neoplasm of nasopharynx	236	Neoplasm of uncertain behavior of genitourinary organs	0	1	0
147	Malignant neoplasm of nasopharynx	237	Neoplasm of uncertain behavior of endocrine glands and nervous system	5.88285	5.88285	1.77204
147	Malignant neoplasm of nasopharynx	238	Neoplasm of uncertain behavior of other and unspecified sites and tissues	1.59805	1	0
147	Malignant neoplasm of nasopharynx	239	Neoplasms of unspecified nature	5.60889	5.60889	1.72435
147	Malignant neoplasm of nasopharynx	240	Simple and unspecified goiter	0.46246	1	0
147	Malignant neoplasm of nasopharynx	242	Thyrotoxicosis with or without goiter	1.04938	1	0
147	Malignant neoplasm of nasopharynx	243	Congenital hypothyroidism	0	1	0
147	Malignant neoplasm of nasopharynx	244	Acquired hypothyroidism	0.938143	1	0
147	Malignant neoplasm of nasopharynx	245	Thyroiditis	0.99559	1	0
147	Malignant neoplasm of nasopharynx	246	Other disorders of thyroid	0	1	0
147	Malignant neoplasm of nasopharynx	250	Diabetes mellitus	0.707884	0.707884	-0.345475
147	Malignant neoplasm of nasopharynx	251	Other disorders of pancreatic internal secretion	0.994979	1	0
147	Malignant neoplasm of nasopharynx	252	Disorders of parathyroid gland	0.341541	1	0
147	Malignant neoplasm of nasopharynx	253	Disorders of the pituitary gland and its hypothalamic control	5.41233	5.41233	1.68868
147	Malignant neoplasm of nasopharynx	255	Disorders of adrenal glands	1.04399	1	0
147	Malignant neoplasm of nasopharynx	256	Ovarian dysfunction	6.70619	1	0
147	Malignant neoplasm of nasopharynx	257	Testicular dysfunction	0	1	0
147	Malignant neoplasm of nasopharynx	258	Polyglandular dysfunction and related disorders	3.77649	1	0
147	Malignant neoplasm of nasopharynx	259	Other endocrine disorders	2.50281	1	0
147	Malignant neoplasm of nasopharynx	260	Kwashiorkor	4.08644	4.08644	1.40767
147	Malignant neoplasm of nasopharynx	264	Vitamin A deficiency	0	1	0
147	Malignant neoplasm of nasopharynx	265	Thiamine and niacin deficiency states	0	1	0
147	Malignant neoplasm of nasopharynx	266	Deficiency of B-complex components	1.04673	1	0
147	Malignant neoplasm of nasopharynx	267	Ascorbic acid deficiency	0	1	0
147	Malignant neoplasm of nasopharynx	268	Vitamin D deficiency	0	1	0
147	Malignant neoplasm of nasopharynx	269	Other nutritional deficiencies	3.13655	1	0
147	Malignant neoplasm of nasopharynx	270	Disorders of amino-acid transport and metabolism	4.37962	1	0
147	Malignant neoplasm of nasopharynx	271	Disorders of carbohydrate transport and metabolism	0.245741	1	0
147	Malignant neoplasm of nasopharynx	272	Disorders of lipoid metabolism	0.555441	0.555441	-0.587993
147	Malignant neoplasm of nasopharynx	273	Disorders of plasma protein metabolism	1.96204	1.96204	0.673987
147	Malignant neoplasm of nasopharynx	274	Gout	1.08626	1	0
147	Malignant neoplasm of nasopharynx	275	Disorders of mineral metabolism	3.2579	3.2579	1.18108
147	Malignant neoplasm of nasopharynx	276	Disorders of fluid, electrolyte, and acid-base balance	1.80913	1.80913	0.592844
147	Malignant neoplasm of nasopharynx	277	Other and unspecified disorders of metabolism	0.812815	1	0
147	Malignant neoplasm of nasopharynx	278	Overweight, obesity and other hyperalimentation	0.252102	0.252102	-1.37792
147	Malignant neoplasm of nasopharynx	279	Disorders involving the immune mechanism	1.09977	1	0
147	Malignant neoplasm of nasopharynx	280	Iron deficiency anemias	1.13119	1	0
147	Malignant neoplasm of nasopharynx	281	Other deficiency anemias	1.24587	1	0
147	Malignant neoplasm of nasopharynx	282	Hereditary hemolytic anemias	1.44927	1	0
147	Malignant neoplasm of nasopharynx	283	Acquired hemolytic anemias	0	1	0
147	Malignant neoplasm of nasopharynx	284	Aplastic anemia and other bone marrow failure syndromes	6.4343	6.4343	1.86164
147	Malignant neoplasm of nasopharynx	285	Other and unspecified anemias	1.5519	1.5519	0.439479
147	Malignant neoplasm of nasopharynx	286	Coagulation defects	1.24936	1	0
147	Malignant neoplasm of nasopharynx	287	Purpura and other hemorrhagic conditions	2.2043	2.2043	0.790408
147	Malignant neoplasm of nasopharynx	288	Diseases of white blood cells	5.65041	5.65041	1.73173
147	Malignant neoplasm of nasopharynx	289	Other diseases of blood and blood-forming organs	1.28809	1	0
147	Malignant neoplasm of nasopharynx	290	Dementias	0.532035	0.532035	-0.631046
147	Malignant neoplasm of nasopharynx	291	Alcohol-induced mental disorders	1.32379	1	0
147	Malignant neoplasm of nasopharynx	294	Persistent mental disorders due to conditions classified elsewhere	0.150078	1	0
147	Malignant neoplasm of nasopharynx	295	Schizophrenic disorders	0.712527	1	0
147	Malignant neoplasm of nasopharynx	296	Episodic mood disorders	0.678087	1	0
147	Malignant neoplasm of nasopharynx	299	Pervasive developmental disorders	0	1	0
147	Malignant neoplasm of nasopharynx	300	Anxiety, dissociative and somatoform disorders	0.848589	1	0
147	Malignant neoplasm of nasopharynx	301	Personality disorders	0.393932	1	0
147	Malignant neoplasm of nasopharynx	302	Sexual and gender identity disorders	0	1	0
147	Malignant neoplasm of nasopharynx	303	Alcohol dependence syndrome	2.99701	2.99701	1.09761
147	Malignant neoplasm of nasopharynx	304	Drug dependence	1.49151	1	0
147	Malignant neoplasm of nasopharynx	307	Special symptoms or syndromes, not elsewhere classified	0.30117	1	0
147	Malignant neoplasm of nasopharynx	311	Depressive disorder, not elsewhere classified	1.21006	1	0
147	Malignant neoplasm of nasopharynx	314	Hyperkinetic syndrome of childhood	0	1	0
147	Malignant neoplasm of nasopharynx	319	Unspecified mental retardation	0.637611	1	0
147	Malignant neoplasm of nasopharynx	322	Meningitis of unspecified cause	4.22194	1	0
147	Malignant neoplasm of nasopharynx	323	Encephalitis, myelitis, and encephalomyelitis	2.2444	1	0
147	Malignant neoplasm of nasopharynx	327	Organic sleep disorders	685.579	685.579	6.53026
147	Malignant neoplasm of nasopharynx	330	Cerebral degenerations usually manifest in childhood	0	1	0
147	Malignant neoplasm of nasopharynx	331	Other cerebral degenerations	0.537448	0.537448	-0.620924
147	Malignant neoplasm of nasopharynx	332	Parkinson's disease	0.625117	1	0
147	Malignant neoplasm of nasopharynx	333	Other extrapyramidal disease and abnormal movement disorders	0.730427	1	0
147	Malignant neoplasm of nasopharynx	334	Spinocerebellar disease	1.76398	1	0
147	Malignant neoplasm of nasopharynx	335	Anterior horn cell disease	0	1	0
147	Malignant neoplasm of nasopharynx	337	Disorders of the autonomic nervous system	1.90828	1	0
147	Malignant neoplasm of nasopharynx	340	Multiple sclerosis	0	1	0
147	Malignant neoplasm of nasopharynx	341	Other demyelinating diseases of central nervous system	0	1	0
147	Malignant neoplasm of nasopharynx	342	Hemiplegia and hemiparesis	0.812338	1	0
147	Malignant neoplasm of nasopharynx	345	Epilepsy and recurrent seizures	1.60326	1	0
147	Malignant neoplasm of nasopharynx	346	Migraine	0.654755	1	0
147	Malignant neoplasm of nasopharynx	347	Cataplexy and narcolepsy	0	1	0
147	Malignant neoplasm of nasopharynx	348	Other conditions of brain	1.20667	1	0
147	Malignant neoplasm of nasopharynx	349	Other and unspecified disorders of the nervous system	1.85462	1	0
147	Malignant neoplasm of nasopharynx	351	Facial nerve disorders	5.64315	5.64315	1.73044
147	Malignant neoplasm of nasopharynx	354	Mononeuritis of upper limb and mononeuritis multiplex	0.267949	1	0
147	Malignant neoplasm of nasopharynx	355	Mononeuritis of lower limb	1.56713	1	0
147	Malignant neoplasm of nasopharynx	356	Hereditary and idiopathic peripheral neuropathy	0.881134	1	0
147	Malignant neoplasm of nasopharynx	358	Myoneural disorders	1.86767	1	0
147	Malignant neoplasm of nasopharynx	359	Muscular dystrophies and other myopathies	0	1	0
147	Malignant neoplasm of nasopharynx	361	Retinal detachments and defects	0.860697	1	0
147	Malignant neoplasm of nasopharynx	362	Other retinal disorders	1.29821	1	0
147	Malignant neoplasm of nasopharynx	363	Chorioretinal inflammations, scars, and other disorders of choroid	4.48993	4.48993	1.50184
147	Malignant neoplasm of nasopharynx	365	Glaucoma	0.840714	1	0
147	Malignant neoplasm of nasopharynx	366	Cataract	1.1571	1	0
147	Malignant neoplasm of nasopharynx	368	Visual disturbances	2.77834	2.77834	1.02185
147	Malignant neoplasm of nasopharynx	370	Keratitis	3.4027	1	0
147	Malignant neoplasm of nasopharynx	371	Corneal opacity and other disorders of cornea	1.69577	1	0
147	Malignant neoplasm of nasopharynx	374	Other disorders of eyelids	6.4007	6.4007	1.85641
147	Malignant neoplasm of nasopharynx	377	Disorders of optic nerve and visual pathways	3.46252	1	0
147	Malignant neoplasm of nasopharynx	378	Strabismus and other disorders of binocular eye movements	20.1869	20.1869	3.00503
147	Malignant neoplasm of nasopharynx	386	Vertiginous syndromes and other disorders of vestibular system	0.933858	1	0
147	Malignant neoplasm of nasopharynx	389	Hearing loss	4.44107	4.44107	1.49089
147	Malignant neoplasm of nasopharynx	401	Essential hypertension	0.870296	0.870296	-0.138922
147	Malignant neoplasm of nasopharynx	403	Hypertensive chronic kidney disease	0.270734	0.270734	-1.30662
147	Malignant neoplasm of nasopharynx	405	Secondary hypertension	0	1	0
147	Malignant neoplasm of nasopharynx	410	Acute myocardial infarction	0.444289	0.444289	-0.811279
147	Malignant neoplasm of nasopharynx	414	Other forms of chronic ischemic heart disease	0.632451	0.632451	-0.458153
147	Malignant neoplasm of nasopharynx	416	Chronic pulmonary heart disease	0.273441	0.273441	-1.29667
147	Malignant neoplasm of nasopharynx	425	Cardiomyopathy	0.438618	0.438618	-0.824125
147	Malignant neoplasm of nasopharynx	426	Conduction disorders	0.787133	1	0
147	Malignant neoplasm of nasopharynx	427	Cardiac dysrhythmias	0.703374	0.703374	-0.351867
147	Malignant neoplasm of nasopharynx	428	Heart failure	0.580447	0.580447	-0.543956
147	Malignant neoplasm of nasopharynx	434	Occlusion of cerebral arteries	0.74763	1	0
147	Malignant neoplasm of nasopharynx	435	Transient cerebral ischemia	0.37511	0.37511	-0.980536
147	Malignant neoplasm of nasopharynx	437	Other and ill-defined cerebrovascular disease	0.639243	1	0
147	Malignant neoplasm of nasopharynx	440	Atherosclerosis	0.821088	1	0
147	Malignant neoplasm of nasopharynx	441	Aortic aneurysm and dissection	0.552218	1	0
147	Malignant neoplasm of nasopharynx	443	Other peripheral vascular disease	0.895073	1	0
147	Malignant neoplasm of nasopharynx	446	Polyarteritis nodosa and allied conditions	1.02322	1	0
147	Malignant neoplasm of nasopharynx	448	Disease of capillaries	0	1	0
147	Malignant neoplasm of nasopharynx	453	Other venous embolism and thrombosis	1.02953	1	0
147	Malignant neoplasm of nasopharynx	457	Noninfectious disorders of lymphatic channels	0.402208	1	0
147	Malignant neoplasm of nasopharynx	477	Allergic rhinitis	0.994257	1	0
147	Malignant neoplasm of nasopharynx	480	Viral pneumonia	0.428651	1	0
147	Malignant neoplasm of nasopharynx	482	Other bacterial pneumonia	2.37319	2.37319	0.864237
147	Malignant neoplasm of nasopharynx	492	Emphysema	1.69674	1.69674	0.528707
147	Malignant neoplasm of nasopharynx	493	Asthma	0.500999	0.500999	-0.691151
147	Malignant neoplasm of nasopharynx	496	Chronic airway obstruction, not elsewhere classified	1.53313	1.53313	0.427311
147	Malignant neoplasm of nasopharynx	503	Pneumoconiosis due to other inorganic dust	0	1	0
147	Malignant neoplasm of nasopharynx	512	Pneumothorax	2.49186	2.49186	0.913031
147	Malignant neoplasm of nasopharynx	515	Postinflammatory pulmonary fibrosis	1.23749	1	0
147	Malignant neoplasm of nasopharynx	516	Other alveolar and parietoalveolar pneumonopathy	1.43584	1	0
147	Malignant neoplasm of nasopharynx	518	Other diseases of lung	1.49025	1.49025	0.398946
147	Malignant neoplasm of nasopharynx	520	Disorders of tooth development and eruption	7.91521	1	0
147	Malignant neoplasm of nasopharynx	523	Gingival and periodontal diseases	7.82572	7.82572	2.05742
147	Malignant neoplasm of nasopharynx	526	Diseases of the jaws	15.7064	15.7064	2.75407
147	Malignant neoplasm of nasopharynx	528	Diseases of the oral soft tissues, excluding lesions specific for gingiva and tongue	50.5525	50.5525	3.92301
147	Malignant neoplasm of nasopharynx	555	Regional enteritis	1.0435	1	0
147	Malignant neoplasm of nasopharynx	569	Other disorders of intestine	0.718421	1	0
147	Malignant neoplasm of nasopharynx	571	Chronic liver disease and cirrhosis	1.81803	1.81803	0.597751
147	Malignant neoplasm of nasopharynx	572	Liver abscess and sequelae of chronic liver disease	1.04831	1	0
147	Malignant neoplasm of nasopharynx	574	Cholelithiasis	0.529372	0.529372	-0.636064
147	Malignant neoplasm of nasopharynx	576	Other disorders of biliary tract	0.707191	1	0
147	Malignant neoplasm of nasopharynx	577	Diseases of pancreas	0.649496	1	0
147	Malignant neoplasm of nasopharynx	579	Intestinal malabsorption	0	1	0
147	Malignant neoplasm of nasopharynx	581	Nephrotic syndrome	1.09585	1	0
147	Malignant neoplasm of nasopharynx	583	Nephritis and nephropathy, not specified as acute or chronic	0.510678	1	0
147	Malignant neoplasm of nasopharynx	586	Renal failure, unspecified	1.22784	1	0
147	Malignant neoplasm of nasopharynx	587	Renal sclerosis, unspecified	0	1	0
147	Malignant neoplasm of nasopharynx	588	Disorders resulting from impaired renal function	0	1	0
147	Malignant neoplasm of nasopharynx	592	Calculus of kidney and ureter	0.534324	1	0
147	Malignant neoplasm of nasopharynx	593	Other disorders of kidney and ureter	0.958623	1	0
147	Malignant neoplasm of nasopharynx	599	Other disorders of urethra and urinary tract	0.873232	1	0
147	Malignant neoplasm of nasopharynx	606	Infertility, male	0	1	0
147	Malignant neoplasm of nasopharynx	623	Noninflammatory disorders of vagina	0	1	0
147	Malignant neoplasm of nasopharynx	628	Infertility, female	0	1	0
147	Malignant neoplasm of nasopharynx	641	Antepartum hemorrhage, abruptio placentae, and placenta previa	0	1	0
147	Malignant neoplasm of nasopharynx	642	Hypertension complicating pregnancy, childbirth, and the puerperium	0	1	0
147	Malignant neoplasm of nasopharynx	648	Other current conditions in the mother classifiable elsewhere, but complicating pregnancy, childbirth, or the puerperium	0	1	0
147	Malignant neoplasm of nasopharynx	686	Other local infections of skin and subcutaneous tissue	3.75659	3.75659	1.32351
147	Malignant neoplasm of nasopharynx	690	Erythematosquamous dermatosis	1.11156	1	0
147	Malignant neoplasm of nasopharynx	692	Contact dermatitis and other eczema	2.03538	1	0
147	Malignant neoplasm of nasopharynx	695	Erythematous conditions	2.40545	1	0
147	Malignant neoplasm of nasopharynx	696	Psoriasis and similar disorders	1.16439	1	0
147	Malignant neoplasm of nasopharynx	701	Other hypertrophic and atrophic conditions of skin	1.9033	1	0
147	Malignant neoplasm of nasopharynx	702	Other dermatoses	1.86279	1	0
147	Malignant neoplasm of nasopharynx	703	Diseases of nail	1.39142	1	0
147	Malignant neoplasm of nasopharynx	704	Diseases of hair and hair follicles	2.64624	1	0
147	Malignant neoplasm of nasopharynx	706	Diseases of sebaceous glands	2.9124	1	0
147	Malignant neoplasm of nasopharynx	708	Urticaria	0	1	0
147	Malignant neoplasm of nasopharynx	709	Other disorders of skin and subcutaneous tissue	1.26103	1	0
147	Malignant neoplasm of nasopharynx	710	Diffuse diseases of connective tissue	1.15895	1	0
147	Malignant neoplasm of nasopharynx	714	Rheumatoid arthritis and other inflammatory polyarthropathies	0.556181	1	0
147	Malignant neoplasm of nasopharynx	715	Osteoarthrosis and allied disorders	0.494072	0.494072	-0.705074
147	Malignant neoplasm of nasopharynx	716	Other and unspecified arthropathies	0.662905	1	0
147	Malignant neoplasm of nasopharynx	718	Other derangement of joint	0.544287	1	0
147	Malignant neoplasm of nasopharynx	720	Ankylosing spondylitis and other inflammatory spondylopathies	0.708636	1	0
147	Malignant neoplasm of nasopharynx	722	Intervertebral disc disorders	0.535283	1	0
147	Malignant neoplasm of nasopharynx	723	Other disorders of cervical region	1.32591	1	0
147	Malignant neoplasm of nasopharynx	724	Other and unspecified disorders of back	0.474216	0.474216	-0.746092
147	Malignant neoplasm of nasopharynx	726	Peripheral enthesopathies and allied syndromes	0.586278	1	0
147	Malignant neoplasm of nasopharynx	727	Other disorders of synovium, tendon, and bursa	0.506854	1	0
147	Malignant neoplasm of nasopharynx	728	Disorders of muscle, ligament, and fascia	0.786392	1	0
147	Malignant neoplasm of nasopharynx	729	Other disorders of soft tissues	0.679959	1	0
147	Malignant neoplasm of nasopharynx	731	Osteitis deformans and osteopathies associated with other disorders classified elsewhere	1.75841	1	0
147	Malignant neoplasm of nasopharynx	733	Other disorders of bone and cartilage	1.05954	1	0
147	Malignant neoplasm of nasopharynx	741	Spina bifida	0	1	0
147	Malignant neoplasm of nasopharynx	742	Other congenital anomalies of nervous system	2.46406	1	0
147	Malignant neoplasm of nasopharynx	743	Congenital anomalies of eye	0	1	0
147	Malignant neoplasm of nasopharynx	744	Congenital anomalies of ear, face, and neck	12.9731	1	0
147	Malignant neoplasm of nasopharynx	745	Bulbus cordis anomalies and anomalies of cardiac septal closure	0	1	0
147	Malignant neoplasm of nasopharynx	746	Other congenital anomalies of heart	0	1	0
147	Malignant neoplasm of nasopharynx	747	Other congenital anomalies of circulatory system	0.653363	1	0
147	Malignant neoplasm of nasopharynx	749	Cleft palate and cleft lip	0	1	0
147	Malignant neoplasm of nasopharynx	750	Other congenital anomalies of upper alimentary tract	1.99743	1	0
147	Malignant neoplasm of nasopharynx	751	Other congenital anomalies of digestive system	0.656975	1	0
147	Malignant neoplasm of nasopharynx	752	Congenital anomalies of genital organs	0	1	0
147	Malignant neoplasm of nasopharynx	753	Congenital anomalies of urinary system	1.24299	1	0
147	Malignant neoplasm of nasopharynx	754	Certain congenital musculoskeletal deformities	1.75271	1	0
147	Malignant neoplasm of nasopharynx	755	Other congenital anomalies of limbs	2.2461	1	0
147	Malignant neoplasm of nasopharynx	756	Other congenital musculoskeletal anomalies	0	1	0
147	Malignant neoplasm of nasopharynx	757	Congenital anomalies of the integument	0	1	0
147	Malignant neoplasm of nasopharynx	758	Chromosomal anomalies	0	1	0
147	Malignant neoplasm of nasopharynx	759	Other and unspecified congenital anomalies	0	1	0
147	Malignant neoplasm of nasopharynx	762	Fetus or newborn affected by complications of placenta, cord, and membranes	0	1	0
147	Malignant neoplasm of nasopharynx	763	Fetus or newborn affected by other complications of labor and delivery	0	1	0
147	Malignant neoplasm of nasopharynx	764	Slow fetal growth and fetal malnutrition	0	1	0
147	Malignant neoplasm of nasopharynx	774	Other perinatal jaundice	0	1	0
147	Malignant neoplasm of nasopharynx	780	General symptoms	1.31725	1.31725	0.275544
147	Malignant neoplasm of nasopharynx	781	Symptoms involving nervous and musculoskeletal systems	1.35214	1	0
147	Malignant neoplasm of nasopharynx	782	Symptoms involving skin and other integumentary tissue	1.30951	1	0
147	Malignant neoplasm of nasopharynx	783	Symptoms concerning nutrition, metabolism, and development	4.16401	4.16401	1.42648
147	Malignant neoplasm of nasopharynx	784	Symptoms involving head and neck	2.88742	2.88742	1.06036
147	Malignant neoplasm of nasopharynx	786	Symptoms involving respiratory system and other chest symptoms	0.959127	1	0
147	Malignant neoplasm of nasopharynx	787	Symptoms involving digestive system	5.04517	5.04517	1.61843
147	Malignant neoplasm of nasopharynx	788	Symptoms involving urinary system	1.14063	1	0
147	Malignant neoplasm of nasopharynx	790	Nonspecific findings on examination of blood	1.32831	1	0
147	Malignant neoplasm of nasopharynx	791	Nonspecific findings on examination of urine	1.54445	1	0
147	Malignant neoplasm of nasopharynx	795	Other and nonspecific abnormal cytological, histological, immunological and DNA test findings	0.544942	1	0
147	Malignant neoplasm of nasopharynx	798	Sudden death, cause unknown	0	1	0
147	Malignant neoplasm of nasopharynx	974	Poisoning by water, mineral, and uric acid metabolism drugs	2.80931	1	0
147	Malignant neoplasm of nasopharynx	982	Toxic effect of solvents other than petroleum based	35.5081	35.5081	3.56976
147	Malignant neoplasm of nasopharynx	984	Toxic effect of lead and its compounds (including fumes)	0	1	0
147	Malignant neoplasm of nasopharynx	995	Certain adverse effects not elsewhere classified	0.390007	1	0
147	Malignant neoplasm of nasopharynx	996	Complications peculiar to certain specified procedures	1.29463	1	0
151	Malignant neoplasm of stomach	011	Pulmonary tuberculosis	1.09262	1	0
151	Malignant neoplasm of stomach	027	Other zoonotic bacterial diseases	0.618444	1	0
151	Malignant neoplasm of stomach	030	Leprosy	0.617619	1	0
151	Malignant neoplasm of stomach	031	Diseases due to other mycobacteria	1.23821	1	0
151	Malignant neoplasm of stomach	041	Bacterial infection in conditions classified elsewhere and of unspecified site	1.08617	1.08617	0.082661
151	Malignant neoplasm of stomach	042	Human immunodeficiency virus [HIV] disease	0.434128	1	0
151	Malignant neoplasm of stomach	046	Slow virus infection of central nervous system	1.57022	1	0
151	Malignant neoplasm of stomach	061	Dengue	0	1	0
151	Malignant neoplasm of stomach	078	Other diseases due to viruses and Chlamydiae	0.976696	1	0
151	Malignant neoplasm of stomach	079	Viral and chlamydial infection in conditions classified elsewhere and of unspecified site	0.565594	0.565594	-0.569879
151	Malignant neoplasm of stomach	084	Malaria	0	1	0
151	Malignant neoplasm of stomach	094	Neurosyphilis	1.19893	1	0
151	Malignant neoplasm of stomach	117	Other mycoses	1.88122	1.88122	0.631921
151	Malignant neoplasm of stomach	135	Sarcoidosis	0.922344	1	0
151	Malignant neoplasm of stomach	143	Malignant neoplasm of gum	0.477294	1	0
151	Malignant neoplasm of stomach	150	Malignant neoplasm of esophagus	74.0311	74.0311	4.30449
151	Malignant neoplasm of stomach	153	Malignant neoplasm of colon	1.50846	1.50846	0.411089
151	Malignant neoplasm of stomach	155	Malignant neoplasm of liver and intrahepatic bile ducts	4.50263	4.50263	1.50466
151	Malignant neoplasm of stomach	157	Malignant neoplasm of pancreas	4.60365	4.60365	1.52685
151	Malignant neoplasm of stomach	158	Malignant neoplasm of retroperitoneum and peritoneum	10.2362	10.2362	2.32593
151	Malignant neoplasm of stomach	161	Malignant neoplasm of larynx	1.48121	1.48121	0.392858
151	Malignant neoplasm of stomach	162	Malignant neoplasm of trachea, bronchus, and lung	0.854467	0.854467	-0.157277
151	Malignant neoplasm of stomach	163	Malignant neoplasm of pleura	0.822177	1	0
151	Malignant neoplasm of stomach	164	Malignant neoplasm of thymus, heart, and mediastinum	1.75377	1	0
151	Malignant neoplasm of stomach	170	Malignant neoplasm of bone and articular cartilage	1.58094	1	0
151	Malignant neoplasm of stomach	171	Malignant neoplasm of connective and other soft tissue	6.20635	6.20635	1.82557
151	Malignant neoplasm of stomach	172	Malignant melanoma of skin	0.839384	1	0
151	Malignant neoplasm of stomach	173	Other malignant neoplasm of skin	1.17458	1	0
151	Malignant neoplasm of stomach	174	Malignant neoplasm of female breast	0.408807	0.408807	-0.894512
151	Malignant neoplasm of stomach	176	Kaposi's sarcoma	3.88323	3.88323	1.35667
151	Malignant neoplasm of stomach	182	Malignant neoplasm of body of uterus	0.384382	0.384382	-0.956117
151	Malignant neoplasm of stomach	183	Malignant neoplasm of ovary and other uterine adnexa	1.11592	1	0
151	Malignant neoplasm of stomach	185	Malignant neoplasm of prostate	0.794931	0.794931	-0.2295
151	Malignant neoplasm of stomach	186	Malignant neoplasm of testis	1.05276	1	0
151	Malignant neoplasm of stomach	188	Malignant neoplasm of bladder	0.733321	0.733321	-0.310172
151	Malignant neoplasm of stomach	189	Malignant neoplasm of kidney and other and unspecified urinary organs	1.02733	1	0
151	Malignant neoplasm of stomach	190	Malignant neoplasm of eye	0.152574	1	0
151	Malignant neoplasm of stomach	191	Malignant neoplasm of brain	0.765764	1	0
151	Malignant neoplasm of stomach	192	Malignant neoplasm of other and unspecified parts of nervous system	1.23277	1	0
151	Malignant neoplasm of stomach	193	Malignant neoplasm of thyroid gland	0.48538	1	0
151	Malignant neoplasm of stomach	194	Malignant neoplasm of other endocrine glands and related structures	2.75559	2.75559	1.01363
151	Malignant neoplasm of stomach	199	Malignant neoplasm without specification of site	9.19739	9.19739	2.21892
151	Malignant neoplasm of stomach	200	Lymphosarcoma and reticulosarcoma and other specified malignant tumors of lymphatic tissue	3.54561	3.54561	1.26571
151	Malignant neoplasm of stomach	201	Hodgkin's disease	1.79834	1	0
151	Malignant neoplasm of stomach	202	Other malignant neoplasms of lymphoid and histiocytic tissue	3.38788	3.38788	1.2202
151	Malignant neoplasm of stomach	203	Multiple myeloma and immunoproliferative neoplasms	0.777287	1	0
151	Malignant neoplasm of stomach	204	Lymphoid leukemia	0.862894	1	0
151	Malignant neoplasm of stomach	205	Myeloid leukemia	0.790974	1	0
151	Malignant neoplasm of stomach	207	Other specified leukemia	1.59729	1	0
151	Malignant neoplasm of stomach	208	Leukemia of unspecified cell type	1.0322	1	0
151	Malignant neoplasm of stomach	210	Benign neoplasm of lip, oral cavity, and pharynx	0.442139	0.442139	-0.816131
151	Malignant neoplasm of stomach	211	Benign neoplasm of other parts of digestive system	2.63128	2.63128	0.967469
151	Malignant neoplasm of stomach	213	Benign neoplasm of bone and articular cartilage	0.405617	1	0
151	Malignant neoplasm of stomach	214	Lipoma	1.14833	1	0
151	Malignant neoplasm of stomach	215	Other benign neoplasm of connective and other soft tissue	2.87021	2.87021	1.05438
151	Malignant neoplasm of stomach	216	Benign neoplasm of skin	1.2652	1	0
151	Malignant neoplasm of stomach	217	Benign neoplasm of breast	0.383646	1	0
151	Malignant neoplasm of stomach	218	Uterine leiomyoma	0.575379	0.575379	-0.552726
151	Malignant neoplasm of stomach	227	Benign neoplasm of other endocrine glands and related structures	0.999659	1	0
151	Malignant neoplasm of stomach	228	Hemangioma and lymphangioma, any site	2.61581	2.61581	0.961576
151	Malignant neoplasm of stomach	231	Carcinoma in situ of respiratory system	1.62057	1	0
151	Malignant neoplasm of stomach	235	Neoplasm of uncertain behavior of digestive and respiratory systems	3.18317	3.18317	1.15788
151	Malignant neoplasm of stomach	236	Neoplasm of uncertain behavior of genitourinary organs	1.00035	1	0
151	Malignant neoplasm of stomach	237	Neoplasm of uncertain behavior of endocrine glands and nervous system	0.856106	1	0
151	Malignant neoplasm of stomach	238	Neoplasm of uncertain behavior of other and unspecified sites and tissues	1.0059	1	0
151	Malignant neoplasm of stomach	239	Neoplasms of unspecified nature	3.32071	3.32071	1.20018
151	Malignant neoplasm of stomach	240	Simple and unspecified goiter	0.98546	1	0
151	Malignant neoplasm of stomach	242	Thyrotoxicosis with or without goiter	0.727195	0.727195	-0.31856
151	Malignant neoplasm of stomach	243	Congenital hypothyroidism	0	1	0
151	Malignant neoplasm of stomach	244	Acquired hypothyroidism	0.735331	0.735331	-0.307435
151	Malignant neoplasm of stomach	245	Thyroiditis	0.310465	0.310465	-1.16968
151	Malignant neoplasm of stomach	246	Other disorders of thyroid	0.447875	1	0
151	Malignant neoplasm of stomach	250	Diabetes mellitus	0.88958	0.88958	-0.117005
151	Malignant neoplasm of stomach	251	Other disorders of pancreatic internal secretion	1.26695	1.26695	0.236616
151	Malignant neoplasm of stomach	252	Disorders of parathyroid gland	0.798798	1	0
151	Malignant neoplasm of stomach	253	Disorders of the pituitary gland and its hypothalamic control	0.901807	1	0
151	Malignant neoplasm of stomach	255	Disorders of adrenal glands	1.05806	1	0
151	Malignant neoplasm of stomach	256	Ovarian dysfunction	1.04563	1	0
151	Malignant neoplasm of stomach	257	Testicular dysfunction	2.00743	1	0
151	Malignant neoplasm of stomach	258	Polyglandular dysfunction and related disorders	2.35533	2.35533	0.856679
151	Malignant neoplasm of stomach	259	Other endocrine disorders	1.9512	1.9512	0.668443
151	Malignant neoplasm of stomach	260	Kwashiorkor	6.03177	6.03177	1.79704
151	Malignant neoplasm of stomach	264	Vitamin A deficiency	11.1171	11.1171	2.40849
151	Malignant neoplasm of stomach	265	Thiamine and niacin deficiency states	0.845281	1	0
151	Malignant neoplasm of stomach	266	Deficiency of B-complex components	1.76264	1.76264	0.566811
151	Malignant neoplasm of stomach	267	Ascorbic acid deficiency	5.3243	1	0
151	Malignant neoplasm of stomach	268	Vitamin D deficiency	1.21642	1	0
151	Malignant neoplasm of stomach	269	Other nutritional deficiencies	3.05658	3.05658	1.1173
151	Malignant neoplasm of stomach	270	Disorders of amino-acid transport and metabolism	0.455247	1	0
151	Malignant neoplasm of stomach	271	Disorders of carbohydrate transport and metabolism	0.855723	1	0
151	Malignant neoplasm of stomach	272	Disorders of lipoid metabolism	0.463203	0.463203	-0.76959
151	Malignant neoplasm of stomach	273	Disorders of plasma protein metabolism	2.70571	2.70571	0.995366
151	Malignant neoplasm of stomach	274	Gout	1.00211	1	0
151	Malignant neoplasm of stomach	275	Disorders of mineral metabolism	1.73087	1.73087	0.548623
151	Malignant neoplasm of stomach	276	Disorders of fluid, electrolyte, and acid-base balance	1.68683	1.68683	0.522848
151	Malignant neoplasm of stomach	277	Other and unspecified disorders of metabolism	1.18285	1	0
151	Malignant neoplasm of stomach	278	Overweight, obesity and other hyperalimentation	0.51828	0.51828	-0.65724
151	Malignant neoplasm of stomach	279	Disorders involving the immune mechanism	1.71476	1.71476	0.539274
151	Malignant neoplasm of stomach	280	Iron deficiency anemias	4.00894	4.00894	1.38853
151	Malignant neoplasm of stomach	281	Other deficiency anemias	2.1638	2.1638	0.771864
151	Malignant neoplasm of stomach	282	Hereditary hemolytic anemias	1.88309	1.88309	0.632912
151	Malignant neoplasm of stomach	283	Acquired hemolytic anemias	1.56937	1.56937	0.450676
151	Malignant neoplasm of stomach	284	Aplastic anemia and other bone marrow failure syndromes	4.87287	4.87287	1.58368
151	Malignant neoplasm of stomach	285	Other and unspecified anemias	2.33182	2.33182	0.846648
151	Malignant neoplasm of stomach	286	Coagulation defects	1.52999	1.52999	0.425263
151	Malignant neoplasm of stomach	287	Purpura and other hemorrhagic conditions	1.97052	1.97052	0.678295
151	Malignant neoplasm of stomach	288	Diseases of white blood cells	3.66706	3.66706	1.29939
151	Malignant neoplasm of stomach	289	Other diseases of blood and blood-forming organs	1.96822	1.96822	0.677129
151	Malignant neoplasm of stomach	290	Dementias	0.615063	0.615063	-0.48603
151	Malignant neoplasm of stomach	291	Alcohol-induced mental disorders	0.82562	1	0
151	Malignant neoplasm of stomach	294	Persistent mental disorders due to conditions classified elsewhere	0.694205	0.694205	-0.364988
151	Malignant neoplasm of stomach	295	Schizophrenic disorders	0.697445	0.697445	-0.360332
151	Malignant neoplasm of stomach	296	Episodic mood disorders	0.631009	0.631009	-0.460435
151	Malignant neoplasm of stomach	299	Pervasive developmental disorders	1.42967	1	0
151	Malignant neoplasm of stomach	300	Anxiety, dissociative and somatoform disorders	0.683613	0.683613	-0.380363
151	Malignant neoplasm of stomach	301	Personality disorders	0.481139	0.481139	-0.731599
151	Malignant neoplasm of stomach	302	Sexual and gender identity disorders	0.713003	1	0
151	Malignant neoplasm of stomach	303	Alcohol dependence syndrome	1.08762	1	0
151	Malignant neoplasm of stomach	304	Drug dependence	0.562012	0.562012	-0.576232
151	Malignant neoplasm of stomach	307	Special symptoms or syndromes, not elsewhere classified	0.782642	1	0
151	Malignant neoplasm of stomach	311	Depressive disorder, not elsewhere classified	1.07935	1	0
151	Malignant neoplasm of stomach	314	Hyperkinetic syndrome of childhood	1.18167	1	0
151	Malignant neoplasm of stomach	319	Unspecified mental retardation	0.695915	1	0
151	Malignant neoplasm of stomach	322	Meningitis of unspecified cause	1.09714	1	0
151	Malignant neoplasm of stomach	323	Encephalitis, myelitis, and encephalomyelitis	0.699896	1	0
151	Malignant neoplasm of stomach	327	Organic sleep disorders	0	1	0
151	Malignant neoplasm of stomach	330	Cerebral degenerations usually manifest in childhood	0.804191	1	0
151	Malignant neoplasm of stomach	331	Other cerebral degenerations	0.561453	0.561453	-0.577227
151	Malignant neoplasm of stomach	332	Parkinson's disease	0.680248	0.680248	-0.385298
151	Malignant neoplasm of stomach	333	Other extrapyramidal disease and abnormal movement disorders	0.68333	0.68333	-0.380777
151	Malignant neoplasm of stomach	334	Spinocerebellar disease	0.687602	1	0
151	Malignant neoplasm of stomach	335	Anterior horn cell disease	0.554799	1	0
151	Malignant neoplasm of stomach	337	Disorders of the autonomic nervous system	0.919666	1	0
151	Malignant neoplasm of stomach	340	Multiple sclerosis	0.397316	0.397316	-0.923022
151	Malignant neoplasm of stomach	341	Other demyelinating diseases of central nervous system	1.61837	1	0
151	Malignant neoplasm of stomach	342	Hemiplegia and hemiparesis	0.662385	0.662385	-0.411909
151	Malignant neoplasm of stomach	345	Epilepsy and recurrent seizures	0.754328	0.754328	-0.281928
151	Malignant neoplasm of stomach	346	Migraine	0.510448	0.510448	-0.672467
151	Malignant neoplasm of stomach	347	Cataplexy and narcolepsy	1.15845	1	0
151	Malignant neoplasm of stomach	348	Other conditions of brain	0.776695	0.776695	-0.252707
151	Malignant neoplasm of stomach	349	Other and unspecified disorders of the nervous system	1.08784	1	0
151	Malignant neoplasm of stomach	351	Facial nerve disorders	0.655598	0.655598	-0.422208
151	Malignant neoplasm of stomach	354	Mononeuritis of upper limb and mononeuritis multiplex	0.598828	0.598828	-0.512781
151	Malignant neoplasm of stomach	355	Mononeuritis of lower limb	0.963814	1	0
151	Malignant neoplasm of stomach	356	Hereditary and idiopathic peripheral neuropathy	1.02277	1	0
151	Malignant neoplasm of stomach	358	Myoneural disorders	0.905979	1	0
151	Malignant neoplasm of stomach	359	Muscular dystrophies and other myopathies	0.935247	1	0
151	Malignant neoplasm of stomach	361	Retinal detachments and defects	0.37576	0.37576	-0.978803
151	Malignant neoplasm of stomach	362	Other retinal disorders	0.63921	0.63921	-0.447522
151	Malignant neoplasm of stomach	363	Chorioretinal inflammations, scars, and other disorders of choroid	0.388929	1	0
151	Malignant neoplasm of stomach	365	Glaucoma	0.91759	1	0
151	Malignant neoplasm of stomach	366	Cataract	0.675401	0.675401	-0.392448
151	Malignant neoplasm of stomach	368	Visual disturbances	0.6498	0.6498	-0.431091
151	Malignant neoplasm of stomach	370	Keratitis	0.618975	1	0
151	Malignant neoplasm of stomach	371	Corneal opacity and other disorders of cornea	0.683044	1	0
151	Malignant neoplasm of stomach	374	Other disorders of eyelids	0.807904	1	0
151	Malignant neoplasm of stomach	377	Disorders of optic nerve and visual pathways	0.659849	1	0
151	Malignant neoplasm of stomach	378	Strabismus and other disorders of binocular eye movements	0.909292	1	0
151	Malignant neoplasm of stomach	386	Vertiginous syndromes and other disorders of vestibular system	0.578696	0.578696	-0.546978
151	Malignant neoplasm of stomach	389	Hearing loss	1.05083	1	0
151	Malignant neoplasm of stomach	401	Essential hypertension	0.869575	0.869575	-0.139751
151	Malignant neoplasm of stomach	403	Hypertensive chronic kidney disease	0.848949	0.848949	-0.163756
151	Malignant neoplasm of stomach	405	Secondary hypertension	0.403578	0.403578	-0.907386
151	Malignant neoplasm of stomach	410	Acute myocardial infarction	0.628377	0.628377	-0.464616
151	Malignant neoplasm of stomach	414	Other forms of chronic ischemic heart disease	0.81164	0.81164	-0.208698
151	Malignant neoplasm of stomach	416	Chronic pulmonary heart disease	0.693528	0.693528	-0.365963
151	Malignant neoplasm of stomach	425	Cardiomyopathy	0.788491	0.788491	-0.237634
151	Malignant neoplasm of stomach	426	Conduction disorders	0.841503	0.841503	-0.172565
151	Malignant neoplasm of stomach	427	Cardiac dysrhythmias	0.950909	0.950909	-0.0503371
151	Malignant neoplasm of stomach	428	Heart failure	0.993439	1	0
151	Malignant neoplasm of stomach	434	Occlusion of cerebral arteries	0.70225	0.70225	-0.353466
151	Malignant neoplasm of stomach	435	Transient cerebral ischemia	0.667497	0.667497	-0.40422
151	Malignant neoplasm of stomach	437	Other and ill-defined cerebrovascular disease	0.656167	0.656167	-0.421339
151	Malignant neoplasm of stomach	440	Atherosclerosis	0.740276	0.740276	-0.300732
151	Malignant neoplasm of stomach	441	Aortic aneurysm and dissection	1.22798	1.22798	0.205369
151	Malignant neoplasm of stomach	443	Other peripheral vascular disease	0.857002	0.857002	-0.154315
151	Malignant neoplasm of stomach	446	Polyarteritis nodosa and allied conditions	0.452033	0.452033	-0.794
151	Malignant neoplasm of stomach	448	Disease of capillaries	1.5091	1	0
151	Malignant neoplasm of stomach	453	Other venous embolism and thrombosis	1.82311	1.82311	0.600542
151	Malignant neoplasm of stomach	457	Noninfectious disorders of lymphatic channels	1.37967	1.37967	0.321845
151	Malignant neoplasm of stomach	477	Allergic rhinitis	0.490912	0.490912	-0.71149
151	Malignant neoplasm of stomach	480	Viral pneumonia	0.73519	1	0
151	Malignant neoplasm of stomach	482	Other bacterial pneumonia	1.42772	1.42772	0.356081
151	Malignant neoplasm of stomach	492	Emphysema	1.33286	1.33286	0.287324
151	Malignant neoplasm of stomach	493	Asthma	0.671997	0.671997	-0.397501
151	Malignant neoplasm of stomach	496	Chronic airway obstruction, not elsewhere classified	1.27008	1.27008	0.239082
151	Malignant neoplasm of stomach	503	Pneumoconiosis due to other inorganic dust	0	1	0
151	Malignant neoplasm of stomach	512	Pneumothorax	2.56736	2.56736	0.942878
151	Malignant neoplasm of stomach	515	Postinflammatory pulmonary fibrosis	1.00763	1	0
151	Malignant neoplasm of stomach	516	Other alveolar and parietoalveolar pneumonopathy	0.820883	1	0
151	Malignant neoplasm of stomach	518	Other diseases of lung	1.86989	1.86989	0.625879
151	Malignant neoplasm of stomach	520	Disorders of tooth development and eruption	0	1	0
151	Malignant neoplasm of stomach	523	Gingival and periodontal diseases	1.06767	1	0
151	Malignant neoplasm of stomach	526	Diseases of the jaws	0.453509	1	0
151	Malignant neoplasm of stomach	528	Diseases of the oral soft tissues, excluding lesions specific for gingiva and tongue	5.1733	5.1733	1.64351
151	Malignant neoplasm of stomach	555	Regional enteritis	0.867747	1	0
151	Malignant neoplasm of stomach	569	Other disorders of intestine	1.56076	1.56076	0.445175
151	Malignant neoplasm of stomach	571	Chronic liver disease and cirrhosis	1.52636	1.52636	0.422887
151	Malignant neoplasm of stomach	572	Liver abscess and sequelae of chronic liver disease	2.65883	2.65883	0.977887
151	Malignant neoplasm of stomach	574	Cholelithiasis	1.47794	1.47794	0.39065
151	Malignant neoplasm of stomach	576	Other disorders of biliary tract	3.01392	3.01392	1.10324
151	Malignant neoplasm of stomach	577	Diseases of pancreas	1.51663	1.51663	0.416492
151	Malignant neoplasm of stomach	579	Intestinal malabsorption	4.4562	4.4562	1.4943
151	Malignant neoplasm of stomach	581	Nephrotic syndrome	0.797369	1	0
151	Malignant neoplasm of stomach	583	Nephritis and nephropathy, not specified as acute or chronic	0.813945	1	0
151	Malignant neoplasm of stomach	586	Renal failure, unspecified	1.08486	1	0
151	Malignant neoplasm of stomach	587	Renal sclerosis, unspecified	0.652047	1	0
151	Malignant neoplasm of stomach	588	Disorders resulting from impaired renal function	0.883274	1	0
151	Malignant neoplasm of stomach	592	Calculus of kidney and ureter	0.763693	0.763693	-0.26959
151	Malignant neoplasm of stomach	593	Other disorders of kidney and ureter	1.08424	1	0
151	Malignant neoplasm of stomach	599	Other disorders of urethra and urinary tract	1.06312	1.06312	0.0612051
151	Malignant neoplasm of stomach	606	Infertility, male	0	1	0
151	Malignant neoplasm of stomach	623	Noninflammatory disorders of vagina	0.449723	0.449723	-0.799124
151	Malignant neoplasm of stomach	628	Infertility, female	0	1	0
151	Malignant neoplasm of stomach	641	Antepartum hemorrhage, abruptio placentae, and placenta previa	0	1	0
151	Malignant neoplasm of stomach	642	Hypertension complicating pregnancy, childbirth, and the puerperium	0	1	0
151	Malignant neoplasm of stomach	648	Other current conditions in the mother classifiable elsewhere, but complicating pregnancy, childbirth, or the puerperium	0	1	0
151	Malignant neoplasm of stomach	686	Other local infections of skin and subcutaneous tissue	0.902999	1	0
151	Malignant neoplasm of stomach	690	Erythematosquamous dermatosis	0.808805	1	0
151	Malignant neoplasm of stomach	692	Contact dermatitis and other eczema	0.899178	1	0
151	Malignant neoplasm of stomach	695	Erythematous conditions	0.732256	1	0
151	Malignant neoplasm of stomach	696	Psoriasis and similar disorders	0.66569	0.66569	-0.406931
151	Malignant neoplasm of stomach	701	Other hypertrophic and atrophic conditions of skin	0.857316	1	0
151	Malignant neoplasm of stomach	702	Other dermatoses	1.13758	1	0
151	Malignant neoplasm of stomach	703	Diseases of nail	0.916015	1	0
151	Malignant neoplasm of stomach	704	Diseases of hair and hair follicles	2.33808	2.33808	0.849329
151	Malignant neoplasm of stomach	706	Diseases of sebaceous glands	0.999024	1	0
151	Malignant neoplasm of stomach	708	Urticaria	1.02097	1	0
151	Malignant neoplasm of stomach	709	Other disorders of skin and subcutaneous tissue	1.13603	1	0
151	Malignant neoplasm of stomach	710	Diffuse diseases of connective tissue	0.652542	0.652542	-0.42688
151	Malignant neoplasm of stomach	714	Rheumatoid arthritis and other inflammatory polyarthropathies	0.464915	0.464915	-0.765901
151	Malignant neoplasm of stomach	715	Osteoarthrosis and allied disorders	0.551493	0.551493	-0.595126
151	Malignant neoplasm of stomach	716	Other and unspecified arthropathies	0.785538	0.785538	-0.241386
151	Malignant neoplasm of stomach	718	Other derangement of joint	0.414898	0.414898	-0.879724
151	Malignant neoplasm of stomach	720	Ankylosing spondylitis and other inflammatory spondylopathies	0.736605	1	0
151	Malignant neoplasm of stomach	722	Intervertebral disc disorders	0.431217	0.431217	-0.841143
151	Malignant neoplasm of stomach	723	Other disorders of cervical region	0.666148	0.666148	-0.406243
151	Malignant neoplasm of stomach	724	Other and unspecified disorders of back	0.581142	0.581142	-0.54276
151	Malignant neoplasm of stomach	726	Peripheral enthesopathies and allied syndromes	0.552829	0.552829	-0.592706
151	Malignant neoplasm of stomach	727	Other disorders of synovium, tendon, and bursa	0.395144	0.395144	-0.928505
151	Malignant neoplasm of stomach	728	Disorders of muscle, ligament, and fascia	0.916689	1	0
151	Malignant neoplasm of stomach	729	Other disorders of soft tissues	0.710722	0.710722	-0.341473
151	Malignant neoplasm of stomach	731	Osteitis deformans and osteopathies associated with other disorders classified elsewhere	1.17285	1	0
151	Malignant neoplasm of stomach	733	Other disorders of bone and cartilage	0.648404	0.648404	-0.433241
151	Malignant neoplasm of stomach	741	Spina bifida	0.857804	1	0
151	Malignant neoplasm of stomach	742	Other congenital anomalies of nervous system	0.768395	1	0
151	Malignant neoplasm of stomach	743	Congenital anomalies of eye	0	1	0
151	Malignant neoplasm of stomach	744	Congenital anomalies of ear, face, and neck	1.34851	1	0
151	Malignant neoplasm of stomach	745	Bulbus cordis anomalies and anomalies of cardiac septal closure	0.326552	1	0
151	Malignant neoplasm of stomach	746	Other congenital anomalies of heart	0.714355	1	0
151	Malignant neoplasm of stomach	747	Other congenital anomalies of circulatory system	0.848937	1	0
151	Malignant neoplasm of stomach	749	Cleft palate and cleft lip	0	1	0
151	Malignant neoplasm of stomach	750	Other congenital anomalies of upper alimentary tract	1.5572	1	0
151	Malignant neoplasm of stomach	751	Other congenital anomalies of digestive system	2.01457	2.01457	0.700405
151	Malignant neoplasm of stomach	752	Congenital anomalies of genital organs	0.550136	1	0
151	Malignant neoplasm of stomach	753	Congenital anomalies of urinary system	1.06594	1	0
151	Malignant neoplasm of stomach	754	Certain congenital musculoskeletal deformities	0.182188	1	0
151	Malignant neoplasm of stomach	755	Other congenital anomalies of limbs	0.700425	1	0
151	Malignant neoplasm of stomach	756	Other congenital musculoskeletal anomalies	0.505066	0.505066	-0.683066
151	Malignant neoplasm of stomach	757	Congenital anomalies of the integument	1.06339	1	0
151	Malignant neoplasm of stomach	758	Chromosomal anomalies	0	1	0
151	Malignant neoplasm of stomach	759	Other and unspecified congenital anomalies	2.94291	2.94291	1.0794
151	Malignant neoplasm of stomach	762	Fetus or newborn affected by complications of placenta, cord, and membranes	0	1	0
151	Malignant neoplasm of stomach	763	Fetus or newborn affected by other complications of labor and delivery	2.36334	1	0
151	Malignant neoplasm of stomach	764	Slow fetal growth and fetal malnutrition	0	1	0
151	Malignant neoplasm of stomach	774	Other perinatal jaundice	0	1	0
151	Malignant neoplasm of stomach	780	General symptoms	0.980449	1	0
151	Malignant neoplasm of stomach	781	Symptoms involving nervous and musculoskeletal systems	0.730866	0.730866	-0.313526
151	Malignant neoplasm of stomach	782	Symptoms involving skin and other integumentary tissue	1.24673	1.24673	0.220524
151	Malignant neoplasm of stomach	783	Symptoms concerning nutrition, metabolism, and development	3.1756	3.1756	1.1555
151	Malignant neoplasm of stomach	784	Symptoms involving head and neck	0.649459	0.649459	-0.431616
151	Malignant neoplasm of stomach	786	Symptoms involving respiratory system and other chest symptoms	0.730951	0.730951	-0.313409
151	Malignant neoplasm of stomach	787	Symptoms involving digestive system	2.43801	2.43801	0.891183
151	Malignant neoplasm of stomach	788	Symptoms involving urinary system	1.02861	1	0
151	Malignant neoplasm of stomach	790	Nonspecific findings on examination of blood	0.914358	1	0
151	Malignant neoplasm of stomach	791	Nonspecific findings on examination of urine	0.695678	1	0
151	Malignant neoplasm of stomach	795	Other and nonspecific abnormal cytological, histological, immunological and DNA test findings	0.962965	1	0
151	Malignant neoplasm of stomach	798	Sudden death, cause unknown	1.68442	1	0
151	Malignant neoplasm of stomach	974	Poisoning by water, mineral, and uric acid metabolism drugs	0.511032	1	0
151	Malignant neoplasm of stomach	982	Toxic effect of solvents other than petroleum based	0	1	0
151	Malignant neoplasm of stomach	984	Toxic effect of lead and its compounds (including fumes)	0	1	0
151	Malignant neoplasm of stomach	995	Certain adverse effects not elsewhere classified	0.79053	0.79053	-0.235051
151	Malignant neoplasm of stomach	996	Complications peculiar to certain specified procedures	1.23094	1.23094	0.20778
155	Malignant neoplasm of liver and intrahepatic bile ducts	011	Pulmonary tuberculosis	1.69514	1	0
155	Malignant neoplasm of liver and intrahepatic bile ducts	027	Other zoonotic bacterial diseases	1.74452	1	0
155	Malignant neoplasm of liver and intrahepatic bile ducts	030	Leprosy	0	1	0
155	Malignant neoplasm of liver and intrahepatic bile ducts	031	Diseases due to other mycobacteria	2.44494	1	0
155	Malignant neoplasm of liver and intrahepatic bile ducts	041	Bacterial infection in conditions classified elsewhere and of unspecified site	1.2717	1.2717	0.240351
155	Malignant neoplasm of liver and intrahepatic bile ducts	042	Human immunodeficiency virus [HIV] disease	1.2246	1	0
155	Malignant neoplasm of liver and intrahepatic bile ducts	046	Slow virus infection of central nervous system	4.42931	1	0
155	Malignant neoplasm of liver and intrahepatic bile ducts	061	Dengue	0	1	0
155	Malignant neoplasm of liver and intrahepatic bile ducts	078	Other diseases due to viruses and Chlamydiae	2.38774	2.38774	0.870348
155	Malignant neoplasm of liver and intrahepatic bile ducts	079	Viral and chlamydial infection in conditions classified elsewhere and of unspecified site	1.00226	1	0
155	Malignant neoplasm of liver and intrahepatic bile ducts	084	Malaria	0	1	0
155	Malignant neoplasm of liver and intrahepatic bile ducts	094	Neurosyphilis	1.69098	1	0
155	Malignant neoplasm of liver and intrahepatic bile ducts	117	Other mycoses	1.76886	1	0
155	Malignant neoplasm of liver and intrahepatic bile ducts	135	Sarcoidosis	1.85841	1	0
155	Malignant neoplasm of liver and intrahepatic bile ducts	143	Malignant neoplasm of gum	0	1	0
155	Malignant neoplasm of liver and intrahepatic bile ducts	150	Malignant neoplasm of esophagus	2.52697	2.52697	0.927021
155	Malignant neoplasm of liver and intrahepatic bile ducts	153	Malignant neoplasm of colon	2.91297	2.91297	1.06917
155	Malignant neoplasm of liver and intrahepatic bile ducts	157	Malignant neoplasm of pancreas	20.6143	20.6143	3.02598
155	Malignant neoplasm of liver and intrahepatic bile ducts	158	Malignant neoplasm of retroperitoneum and peritoneum	10.4709	10.4709	2.3486
155	Malignant neoplasm of liver and intrahepatic bile ducts	161	Malignant neoplasm of larynx	1.23448	1	0
155	Malignant neoplasm of liver and intrahepatic bile ducts	162	Malignant neoplasm of trachea, bronchus, and lung	2.44314	2.44314	0.893284
155	Malignant neoplasm of liver and intrahepatic bile ducts	163	Malignant neoplasm of pleura	1.85537	1	0
155	Malignant neoplasm of liver and intrahepatic bile ducts	170	Malignant neoplasm of bone and articular cartilage	11.6444	11.6444	2.45482
155	Malignant neoplasm of liver and intrahepatic bile ducts	171	Malignant neoplasm of connective and other soft tissue	5.93458	5.93458	1.7808
155	Malignant neoplasm of liver and intrahepatic bile ducts	172	Malignant melanoma of skin	1.77582	1	0
155	Malignant neoplasm of liver and intrahepatic bile ducts	173	Other malignant neoplasm of skin	1.76303	1.76303	0.567032
155	Malignant neoplasm of liver and intrahepatic bile ducts	176	Kaposi's sarcoma	3.12969	1	0
155	Malignant neoplasm of liver and intrahepatic bile ducts	182	Malignant neoplasm of body of uterus	0.58928	0.58928	-0.528854
155	Malignant neoplasm of liver and intrahepatic bile ducts	183	Malignant neoplasm of ovary and other uterine adnexa	1.81107	1.81107	0.593919
155	Malignant neoplasm of liver and intrahepatic bile ducts	185	Malignant neoplasm of prostate	0.781379	0.781379	-0.246695
155	Malignant neoplasm of liver and intrahepatic bile ducts	186	Malignant neoplasm of testis	2.96965	1	0
155	Malignant neoplasm of liver and intrahepatic bile ducts	188	Malignant neoplasm of bladder	1.27205	1	0
155	Malignant neoplasm of liver and intrahepatic bile ducts	189	Malignant neoplasm of kidney and other and unspecified urinary organs	2.32355	2.32355	0.843097
155	Malignant neoplasm of liver and intrahepatic bile ducts	190	Malignant neoplasm of eye	1.72154	1	0
155	Malignant neoplasm of liver and intrahepatic bile ducts	191	Malignant neoplasm of brain	3.39442	3.39442	1.22213
155	Malignant neoplasm of liver and intrahepatic bile ducts	192	Malignant neoplasm of other and unspecified parts of nervous system	3.04275	3.04275	1.11276
155	Malignant neoplasm of liver and intrahepatic bile ducts	193	Malignant neoplasm of thyroid gland	1.21704	1	0
155	Malignant neoplasm of liver and intrahepatic bile ducts	194	Malignant neoplasm of other endocrine glands and related structures	16.3234	16.3234	2.7926
155	Malignant neoplasm of liver and intrahepatic bile ducts	199	Malignant neoplasm without specification of site	21.907	21.907	3.08681
155	Malignant neoplasm of liver and intrahepatic bile ducts	200	Lymphosarcoma and reticulosarcoma and other specified malignant tumors of lymphatic tissue	1.61136	1	0
155	Malignant neoplasm of liver and intrahepatic bile ducts	202	Other malignant neoplasms of lymphoid and histiocytic tissue	1.6766	1.6766	0.516768
155	Malignant neoplasm of liver and intrahepatic bile ducts	203	Multiple myeloma and immunoproliferative neoplasms	0.913579	1	0
155	Malignant neoplasm of liver and intrahepatic bile ducts	204	Lymphoid leukemia	0.781307	1	0
155	Malignant neoplasm of liver and intrahepatic bile ducts	205	Myeloid leukemia	0.743733	1	0
155	Malignant neoplasm of liver and intrahepatic bile ducts	207	Other specified leukemia	0	1	0
155	Malignant neoplasm of liver and intrahepatic bile ducts	208	Leukemia of unspecified cell type	0.342547	1	0
155	Malignant neoplasm of liver and intrahepatic bile ducts	210	Benign neoplasm of lip, oral cavity, and pharynx	0.519665	1	0
155	Malignant neoplasm of liver and intrahepatic bile ducts	211	Benign neoplasm of other parts of digestive system	2.72391	2.72391	1.00207
155	Malignant neoplasm of liver and intrahepatic bile ducts	213	Benign neoplasm of bone and articular cartilage	0.85813	1	0
155	Malignant neoplasm of liver and intrahepatic bile ducts	214	Lipoma	1.07975	1	0
155	Malignant neoplasm of liver and intrahepatic bile ducts	215	Other benign neoplasm of connective and other soft tissue	0.522345	1	0
155	Malignant neoplasm of liver and intrahepatic bile ducts	216	Benign neoplasm of skin	0.428268	1	0
155	Malignant neoplasm of liver and intrahepatic bile ducts	218	Uterine leiomyoma	0.420082	0.420082	-0.867306
155	Malignant neoplasm of liver and intrahepatic bile ducts	227	Benign neoplasm of other endocrine glands and related structures	0.786938	1	0
155	Malignant neoplasm of liver and intrahepatic bile ducts	228	Hemangioma and lymphangioma, any site	6.6712	6.6712	1.8978
155	Malignant neoplasm of liver and intrahepatic bile ducts	235	Neoplasm of uncertain behavior of digestive and respiratory systems	5.38749	5.38749	1.68408
155	Malignant neoplasm of liver and intrahepatic bile ducts	236	Neoplasm of uncertain behavior of genitourinary organs	1.03961	1	0
155	Malignant neoplasm of liver and intrahepatic bile ducts	237	Neoplasm of uncertain behavior of endocrine glands and nervous system	1.55245	1	0
155	Malignant neoplasm of liver and intrahepatic bile ducts	238	Neoplasm of uncertain behavior of other and unspecified sites and tissues	1.45779	1.45779	0.37692
155	Malignant neoplasm of liver and intrahepatic bile ducts	239	Neoplasms of unspecified nature	6.68571	6.68571	1.89997
155	Malignant neoplasm of liver and intrahepatic bile ducts	240	Simple and unspecified goiter	0.881403	1	0
155	Malignant neoplasm of liver and intrahepatic bile ducts	242	Thyrotoxicosis with or without goiter	0.92308	1	0
155	Malignant neoplasm of liver and intrahepatic bile ducts	243	Congenital hypothyroidism	0	1	0
155	Malignant neoplasm of liver and intrahepatic bile ducts	244	Acquired hypothyroidism	0.957198	1	0
155	Malignant neoplasm of liver and intrahepatic bile ducts	245	Thyroiditis	0.875768	1	0
155	Malignant neoplasm of liver and intrahepatic bile ducts	246	Other disorders of thyroid	1.26338	1	0
155	Malignant neoplasm of liver and intrahepatic bile ducts	250	Diabetes mellitus	1.38935	1.38935	0.328836
155	Malignant neoplasm of liver and intrahepatic bile ducts	251	Other disorders of pancreatic internal secretion	2.38604	2.38604	0.869637
155	Malignant neoplasm of liver and intrahepatic bile ducts	252	Disorders of parathyroid gland	1.35196	1	0
155	Malignant neoplasm of liver and intrahepatic bile ducts	253	Disorders of the pituitary gland and its hypothalamic control	1.54031	1.54031	0.431981
155	Malignant neoplasm of liver and intrahepatic bile ducts	255	Disorders of adrenal glands	1.53057	1.53057	0.425639
155	Malignant neoplasm of liver and intrahepatic bile ducts	256	Ovarian dysfunction	0	1	0
155	Malignant neoplasm of liver and intrahepatic bile ducts	257	Testicular dysfunction	0	1	0
155	Malignant neoplasm of liver and intrahepatic bile ducts	258	Polyglandular dysfunction and related disorders	1.10733	1	0
155	Malignant neoplasm of liver and intrahepatic bile ducts	259	Other endocrine disorders	16.512	16.512	2.80408
155	Malignant neoplasm of liver and intrahepatic bile ducts	260	Kwashiorkor	4.31355	4.31355	1.46176
155	Malignant neoplasm of liver and intrahepatic bile ducts	264	Vitamin A deficiency	0	1	0
155	Malignant neoplasm of liver and intrahepatic bile ducts	265	Thiamine and niacin deficiency states	0.794797	1	0
155	Malignant neoplasm of liver and intrahepatic bile ducts	266	Deficiency of B-complex components	0.705913	1	0
155	Malignant neoplasm of liver and intrahepatic bile ducts	267	Ascorbic acid deficiency	0	1	0
155	Malignant neoplasm of liver and intrahepatic bile ducts	268	Vitamin D deficiency	0.686264	1	0
155	Malignant neoplasm of liver and intrahepatic bile ducts	269	Other nutritional deficiencies	2.52914	2.52914	0.927879
155	Malignant neoplasm of liver and intrahepatic bile ducts	270	Disorders of amino-acid transport and metabolism	12.1996	12.1996	2.50141
155	Malignant neoplasm of liver and intrahepatic bile ducts	271	Disorders of carbohydrate transport and metabolism	0.756578	1	0
155	Malignant neoplasm of liver and intrahepatic bile ducts	272	Disorders of lipoid metabolism	0.48304	0.48304	-0.727656
155	Malignant neoplasm of liver and intrahepatic bile ducts	273	Disorders of plasma protein metabolism	3.35593	3.35593	1.21073
155	Malignant neoplasm of liver and intrahepatic bile ducts	274	Gout	1.02852	1	0
155	Malignant neoplasm of liver and intrahepatic bile ducts	275	Disorders of mineral metabolism	3.59994	3.59994	1.28092
155	Malignant neoplasm of liver and intrahepatic bile ducts	276	Disorders of fluid, electrolyte, and acid-base balance	1.93924	1.93924	0.662295
155	Malignant neoplasm of liver and intrahepatic bile ducts	277	Other and unspecified disorders of metabolism	2.62163	2.62163	0.963797
155	Malignant neoplasm of liver and intrahepatic bile ducts	278	Overweight, obesity and other hyperalimentation	0.636535	0.636535	-0.451716
155	Malignant neoplasm of liver and intrahepatic bile ducts	279	Disorders involving the immune mechanism	0.967408	1	0
155	Malignant neoplasm of liver and intrahepatic bile ducts	280	Iron deficiency anemias	1.9256	1.9256	0.655238
155	Malignant neoplasm of liver and intrahepatic bile ducts	281	Other deficiency anemias	1.33946	1.33946	0.292268
155	Malignant neoplasm of liver and intrahepatic bile ducts	282	Hereditary hemolytic anemias	1.41649	1	0
155	Malignant neoplasm of liver and intrahepatic bile ducts	283	Acquired hemolytic anemias	2.03779	2.03779	0.711866
155	Malignant neoplasm of liver and intrahepatic bile ducts	284	Aplastic anemia and other bone marrow failure syndromes	5.52515	5.52515	1.70931
155	Malignant neoplasm of liver and intrahepatic bile ducts	285	Other and unspecified anemias	1.83934	1.83934	0.609405
155	Malignant neoplasm of liver and intrahepatic bile ducts	286	Coagulation defects	5.36904	5.36904	1.68065
155	Malignant neoplasm of liver and intrahepatic bile ducts	287	Purpura and other hemorrhagic conditions	4.62937	4.62937	1.53242
155	Malignant neoplasm of liver and intrahepatic bile ducts	288	Diseases of white blood cells	3.42884	3.42884	1.23222
155	Malignant neoplasm of liver and intrahepatic bile ducts	289	Other diseases of blood and blood-forming organs	2.87042	2.87042	1.05446
155	Malignant neoplasm of liver and intrahepatic bile ducts	290	Dementias	0.678815	0.678815	-0.387406
155	Malignant neoplasm of liver and intrahepatic bile ducts	291	Alcohol-induced mental disorders	1.5138	1.5138	0.414626
155	Malignant neoplasm of liver and intrahepatic bile ducts	294	Persistent mental disorders due to conditions classified elsewhere	0.770091	1	0
155	Malignant neoplasm of liver and intrahepatic bile ducts	295	Schizophrenic disorders	0.644182	0.644182	-0.439773
155	Malignant neoplasm of liver and intrahepatic bile ducts	296	Episodic mood disorders	0.662753	0.662753	-0.411353
155	Malignant neoplasm of liver and intrahepatic bile ducts	299	Pervasive developmental disorders	0	1	0
155	Malignant neoplasm of liver and intrahepatic bile ducts	300	Anxiety, dissociative and somatoform disorders	0.736092	0.736092	-0.306401
155	Malignant neoplasm of liver and intrahepatic bile ducts	301	Personality disorders	0.462029	0.462029	-0.772128
155	Malignant neoplasm of liver and intrahepatic bile ducts	302	Sexual and gender identity disorders	0	1	0
155	Malignant neoplasm of liver and intrahepatic bile ducts	303	Alcohol dependence syndrome	3.33778	3.33778	1.20531
155	Malignant neoplasm of liver and intrahepatic bile ducts	304	Drug dependence	0.820002	1	0
155	Malignant neoplasm of liver and intrahepatic bile ducts	307	Special symptoms or syndromes, not elsewhere classified	0.883078	1	0
155	Malignant neoplasm of liver and intrahepatic bile ducts	311	Depressive disorder, not elsewhere classified	1.06923	1	0
155	Malignant neoplasm of liver and intrahepatic bile ducts	314	Hyperkinetic syndrome of childhood	0	1	0
155	Malignant neoplasm of liver and intrahepatic bile ducts	319	Unspecified mental retardation	0.934787	1	0
155	Malignant neoplasm of liver and intrahepatic bile ducts	322	Meningitis of unspecified cause	0.825293	1	0
155	Malignant neoplasm of liver and intrahepatic bile ducts	323	Encephalitis, myelitis, and encephalomyelitis	0.329047	1	0
155	Malignant neoplasm of liver and intrahepatic bile ducts	327	Organic sleep disorders	0	1	0
155	Malignant neoplasm of liver and intrahepatic bile ducts	330	Cerebral degenerations usually manifest in childhood	0	1	0
155	Malignant neoplasm of liver and intrahepatic bile ducts	331	Other cerebral degenerations	0.590955	0.590955	-0.526015
155	Malignant neoplasm of liver and intrahepatic bile ducts	332	Parkinson's disease	0.704536	0.704536	-0.350215
155	Malignant neoplasm of liver and intrahepatic bile ducts	333	Other extrapyramidal disease and abnormal movement disorders	0.514014	0.514014	-0.665504
155	Malignant neoplasm of liver and intrahepatic bile ducts	334	Spinocerebellar disease	1.29307	1	0
155	Malignant neoplasm of liver and intrahepatic bile ducts	335	Anterior horn cell disease	0.601919	1	0
155	Malignant neoplasm of liver and intrahepatic bile ducts	337	Disorders of the autonomic nervous system	1.22081	1	0
155	Malignant neoplasm of liver and intrahepatic bile ducts	340	Multiple sclerosis	0.480326	1	0
155	Malignant neoplasm of liver and intrahepatic bile ducts	341	Other demyelinating diseases of central nervous system	0	1	0
155	Malignant neoplasm of liver and intrahepatic bile ducts	342	Hemiplegia and hemiparesis	0.635174	0.635174	-0.453856
155	Malignant neoplasm of liver and intrahepatic bile ducts	345	Epilepsy and recurrent seizures	1.0268	1	0
155	Malignant neoplasm of liver and intrahepatic bile ducts	346	Migraine	0.383969	0.383969	-0.957194
155	Malignant neoplasm of liver and intrahepatic bile ducts	347	Cataplexy and narcolepsy	1.8673	1	0
155	Malignant neoplasm of liver and intrahepatic bile ducts	348	Other conditions of brain	1.56494	1.56494	0.447849
155	Malignant neoplasm of liver and intrahepatic bile ducts	349	Other and unspecified disorders of the nervous system	1.08761	1	0
155	Malignant neoplasm of liver and intrahepatic bile ducts	351	Facial nerve disorders	1.26533	1	0
155	Malignant neoplasm of liver and intrahepatic bile ducts	354	Mononeuritis of upper limb and mononeuritis multiplex	0.392834	0.392834	-0.934367
155	Malignant neoplasm of liver and intrahepatic bile ducts	355	Mononeuritis of lower limb	1.11047	1	0
155	Malignant neoplasm of liver and intrahepatic bile ducts	356	Hereditary and idiopathic peripheral neuropathy	1.50711	1.50711	0.410196
155	Malignant neoplasm of liver and intrahepatic bile ducts	358	Myoneural disorders	0.54763	1	0
155	Malignant neoplasm of liver and intrahepatic bile ducts	359	Muscular dystrophies and other myopathies	1.31908	1	0
155	Malignant neoplasm of liver and intrahepatic bile ducts	361	Retinal detachments and defects	0.605688	1	0
155	Malignant neoplasm of liver and intrahepatic bile ducts	362	Other retinal disorders	0.831429	1	0
155	Malignant neoplasm of liver and intrahepatic bile ducts	363	Chorioretinal inflammations, scars, and other disorders of choroid	0.65826	1	0
155	Malignant neoplasm of liver and intrahepatic bile ducts	365	Glaucoma	0.974837	1	0
155	Malignant neoplasm of liver and intrahepatic bile ducts	366	Cataract	0.913446	1	0
155	Malignant neoplasm of liver and intrahepatic bile ducts	368	Visual disturbances	0.814653	1	0
155	Malignant neoplasm of liver and intrahepatic bile ducts	370	Keratitis	0.748294	1	0
155	Malignant neoplasm of liver and intrahepatic bile ducts	371	Corneal opacity and other disorders of cornea	0.683685	1	0
155	Malignant neoplasm of liver and intrahepatic bile ducts	374	Other disorders of eyelids	0.938393	1	0
155	Malignant neoplasm of liver and intrahepatic bile ducts	377	Disorders of optic nerve and visual pathways	0.507632	1	0
155	Malignant neoplasm of liver and intrahepatic bile ducts	378	Strabismus and other disorders of binocular eye movements	1.18382	1	0
155	Malignant neoplasm of liver and intrahepatic bile ducts	386	Vertiginous syndromes and other disorders of vestibular system	0.52658	0.52658	-0.641351
155	Malignant neoplasm of liver and intrahepatic bile ducts	389	Hearing loss	1.06231	1	0
155	Malignant neoplasm of liver and intrahepatic bile ducts	401	Essential hypertension	0.931086	0.931086	-0.0714039
155	Malignant neoplasm of liver and intrahepatic bile ducts	403	Hypertensive chronic kidney disease	1.04522	1	0
155	Malignant neoplasm of liver and intrahepatic bile ducts	405	Secondary hypertension	0.875709	1	0
155	Malignant neoplasm of liver and intrahepatic bile ducts	410	Acute myocardial infarction	0.56821	0.56821	-0.565263
155	Malignant neoplasm of liver and intrahepatic bile ducts	414	Other forms of chronic ischemic heart disease	0.788139	0.788139	-0.238081
155	Malignant neoplasm of liver and intrahepatic bile ducts	416	Chronic pulmonary heart disease	0.994196	1	0
155	Malignant neoplasm of liver and intrahepatic bile ducts	425	Cardiomyopathy	0.892704	1	0
155	Malignant neoplasm of liver and intrahepatic bile ducts	426	Conduction disorders	0.832632	0.832632	-0.183163
155	Malignant neoplasm of liver and intrahepatic bile ducts	427	Cardiac dysrhythmias	0.908517	0.908517	-0.0959418
155	Malignant neoplasm of liver and intrahepatic bile ducts	428	Heart failure	1.08743	1.08743	0.0838128
155	Malignant neoplasm of liver and intrahepatic bile ducts	434	Occlusion of cerebral arteries	0.681565	0.681565	-0.383364
155	Malignant neoplasm of liver and intrahepatic bile ducts	435	Transient cerebral ischemia	0.570891	0.570891	-0.560557
155	Malignant neoplasm of liver and intrahepatic bile ducts	437	Other and ill-defined cerebrovascular disease	0.740373	0.740373	-0.300601
155	Malignant neoplasm of liver and intrahepatic bile ducts	440	Atherosclerosis	0.913889	1	0
155	Malignant neoplasm of liver and intrahepatic bile ducts	441	Aortic aneurysm and dissection	1.00043	1	0
155	Malignant neoplasm of liver and intrahepatic bile ducts	443	Other peripheral vascular disease	0.88358	1	0
155	Malignant neoplasm of liver and intrahepatic bile ducts	446	Polyarteritis nodosa and allied conditions	0.525044	1	0
155	Malignant neoplasm of liver and intrahepatic bile ducts	448	Disease of capillaries	2.91262	2.91262	1.06905
155	Malignant neoplasm of liver and intrahepatic bile ducts	453	Other venous embolism and thrombosis	1.70883	1.70883	0.535809
155	Malignant neoplasm of liver and intrahepatic bile ducts	457	Noninfectious disorders of lymphatic channels	1.71004	1.71004	0.536515
155	Malignant neoplasm of liver and intrahepatic bile ducts	477	Allergic rhinitis	0.583064	1	0
155	Malignant neoplasm of liver and intrahepatic bile ducts	480	Viral pneumonia	0.754124	1	0
155	Malignant neoplasm of liver and intrahepatic bile ducts	482	Other bacterial pneumonia	1.0715	1	0
155	Malignant neoplasm of liver and intrahepatic bile ducts	492	Emphysema	1.26865	1.26865	0.237954
155	Malignant neoplasm of liver and intrahepatic bile ducts	493	Asthma	0.819254	0.819254	-0.199361
155	Malignant neoplasm of liver and intrahepatic bile ducts	496	Chronic airway obstruction, not elsewhere classified	1.20422	1.20422	0.185829
155	Malignant neoplasm of liver and intrahepatic bile ducts	503	Pneumoconiosis due to other inorganic dust	5.70588	1	0
155	Malignant neoplasm of liver and intrahepatic bile ducts	512	Pneumothorax	1.59025	1.59025	0.463889
155	Malignant neoplasm of liver and intrahepatic bile ducts	515	Postinflammatory pulmonary fibrosis	1.08856	1	0
155	Malignant neoplasm of liver and intrahepatic bile ducts	518	Other diseases of lung	1.52193	1.52193	0.419981
155	Malignant neoplasm of liver and intrahepatic bile ducts	520	Disorders of tooth development and eruption	0	1	0
155	Malignant neoplasm of liver and intrahepatic bile ducts	523	Gingival and periodontal diseases	1.57755	1	0
155	Malignant neoplasm of liver and intrahepatic bile ducts	526	Diseases of the jaws	1.02342	1	0
155	Malignant neoplasm of liver and intrahepatic bile ducts	555	Regional enteritis	1.47886	1	0
155	Malignant neoplasm of liver and intrahepatic bile ducts	569	Other disorders of intestine	1.60096	1.60096	0.470603
155	Malignant neoplasm of liver and intrahepatic bile ducts	571	Chronic liver disease and cirrhosis	19.8878	19.8878	2.9901
155	Malignant neoplasm of liver and intrahepatic bile ducts	572	Liver abscess and sequelae of chronic liver disease	40.021	40.021	3.6894
155	Malignant neoplasm of liver and intrahepatic bile ducts	574	Cholelithiasis	2.44472	2.44472	0.89393
155	Malignant neoplasm of liver and intrahepatic bile ducts	576	Other disorders of biliary tract	28.0676	28.0676	3.33462
155	Malignant neoplasm of liver and intrahepatic bile ducts	577	Diseases of pancreas	2.57097	2.57097	0.944284
155	Malignant neoplasm of liver and intrahepatic bile ducts	579	Intestinal malabsorption	2.996	2.996	1.09728
155	Malignant neoplasm of liver and intrahepatic bile ducts	581	Nephrotic syndrome	1.39238	1	0
155	Malignant neoplasm of liver and intrahepatic bile ducts	583	Nephritis and nephropathy, not specified as acute or chronic	0.873476	1	0
155	Malignant neoplasm of liver and intrahepatic bile ducts	586	Renal failure, unspecified	2.5617	2.5617	0.94067
155	Malignant neoplasm of liver and intrahepatic bile ducts	587	Renal sclerosis, unspecified	0	1	0
155	Malignant neoplasm of liver and intrahepatic bile ducts	588	Disorders resulting from impaired renal function	2.37292	2.37292	0.864119
155	Malignant neoplasm of liver and intrahepatic bile ducts	592	Calculus of kidney and ureter	0.752026	0.752026	-0.284984
155	Malignant neoplasm of liver and intrahepatic bile ducts	593	Other disorders of kidney and ureter	1.39872	1.39872	0.33556
155	Malignant neoplasm of liver and intrahepatic bile ducts	599	Other disorders of urethra and urinary tract	1.27082	1.27082	0.239663
155	Malignant neoplasm of liver and intrahepatic bile ducts	606	Infertility, male	0	1	0
155	Malignant neoplasm of liver and intrahepatic bile ducts	623	Noninflammatory disorders of vagina	0.74001	1	0
155	Malignant neoplasm of liver and intrahepatic bile ducts	628	Infertility, female	0	1	0
155	Malignant neoplasm of liver and intrahepatic bile ducts	641	Antepartum hemorrhage, abruptio placentae, and placenta previa	0	1	0
155	Malignant neoplasm of liver and intrahepatic bile ducts	642	Hypertension complicating pregnancy, childbirth, and the puerperium	0	1	0
155	Malignant neoplasm of liver and intrahepatic bile ducts	648	Other current conditions in the mother classifiable elsewhere, but complicating pregnancy, childbirth, or the puerperium	37.3327	37.3327	3.61987
155	Malignant neoplasm of liver and intrahepatic bile ducts	686	Other local infections of skin and subcutaneous tissue	0.963806	1	0
155	Malignant neoplasm of liver and intrahepatic bile ducts	690	Erythematosquamous dermatosis	1.46668	1	0
155	Malignant neoplasm of liver and intrahepatic bile ducts	692	Contact dermatitis and other eczema	1.37265	1	0
155	Malignant neoplasm of liver and intrahepatic bile ducts	695	Erythematous conditions	1.30987	1	0
155	Malignant neoplasm of liver and intrahepatic bile ducts	696	Psoriasis and similar disorders	1.10961	1	0
155	Malignant neoplasm of liver and intrahepatic bile ducts	701	Other hypertrophic and atrophic conditions of skin	0.930129	1	0
155	Malignant neoplasm of liver and intrahepatic bile ducts	702	Other dermatoses	1.29722	1	0
155	Malignant neoplasm of liver and intrahepatic bile ducts	703	Diseases of nail	1.29196	1	0
155	Malignant neoplasm of liver and intrahepatic bile ducts	704	Diseases of hair and hair follicles	3.10367	3.10367	1.13259
155	Malignant neoplasm of liver and intrahepatic bile ducts	706	Diseases of sebaceous glands	1.19555	1	0
155	Malignant neoplasm of liver and intrahepatic bile ducts	708	Urticaria	1.29599	1	0
155	Malignant neoplasm of liver and intrahepatic bile ducts	709	Other disorders of skin and subcutaneous tissue	1.29414	1	0
155	Malignant neoplasm of liver and intrahepatic bile ducts	710	Diffuse diseases of connective tissue	0.877875	1	0
155	Malignant neoplasm of liver and intrahepatic bile ducts	714	Rheumatoid arthritis and other inflammatory polyarthropathies	0.74066	0.74066	-0.300214
155	Malignant neoplasm of liver and intrahepatic bile ducts	715	Osteoarthrosis and allied disorders	0.715926	0.715926	-0.334179
155	Malignant neoplasm of liver and intrahepatic bile ducts	716	Other and unspecified arthropathies	0.908699	1	0
155	Malignant neoplasm of liver and intrahepatic bile ducts	718	Other derangement of joint	0.425583	0.425583	-0.854296
155	Malignant neoplasm of liver and intrahepatic bile ducts	720	Ankylosing spondylitis and other inflammatory spondylopathies	0.831134	1	0
155	Malignant neoplasm of liver and intrahepatic bile ducts	722	Intervertebral disc disorders	0.627813	0.627813	-0.465513
155	Malignant neoplasm of liver and intrahepatic bile ducts	723	Other disorders of cervical region	0.647961	1	0
155	Malignant neoplasm of liver and intrahepatic bile ducts	724	Other and unspecified disorders of back	0.772081	0.772081	-0.258666
155	Malignant neoplasm of liver and intrahepatic bile ducts	726	Peripheral enthesopathies and allied syndromes	0.601671	0.601671	-0.508044
155	Malignant neoplasm of liver and intrahepatic bile ducts	727	Other disorders of synovium, tendon, and bursa	0.33439	0.33439	-1.09545
155	Malignant neoplasm of liver and intrahepatic bile ducts	728	Disorders of muscle, ligament, and fascia	1.03762	1	0
155	Malignant neoplasm of liver and intrahepatic bile ducts	729	Other disorders of soft tissues	0.764269	1	0
155	Malignant neoplasm of liver and intrahepatic bile ducts	731	Osteitis deformans and osteopathies associated with other disorders classified elsewhere	1.03119	1	0
155	Malignant neoplasm of liver and intrahepatic bile ducts	733	Other disorders of bone and cartilage	1.04141	1	0
155	Malignant neoplasm of liver and intrahepatic bile ducts	741	Spina bifida	0	1	0
155	Malignant neoplasm of liver and intrahepatic bile ducts	742	Other congenital anomalies of nervous system	0.722502	1	0
155	Malignant neoplasm of liver and intrahepatic bile ducts	743	Congenital anomalies of eye	0	1	0
155	Malignant neoplasm of liver and intrahepatic bile ducts	744	Congenital anomalies of ear, face, and neck	0	1	0
155	Malignant neoplasm of liver and intrahepatic bile ducts	745	Bulbus cordis anomalies and anomalies of cardiac septal closure	1.15143	1	0
155	Malignant neoplasm of liver and intrahepatic bile ducts	746	Other congenital anomalies of heart	0.881592	1	0
155	Malignant neoplasm of liver and intrahepatic bile ducts	747	Other congenital anomalies of circulatory system	1.81997	1.81997	0.598822
155	Malignant neoplasm of liver and intrahepatic bile ducts	749	Cleft palate and cleft lip	3.43854	1	0
155	Malignant neoplasm of liver and intrahepatic bile ducts	750	Other congenital anomalies of upper alimentary tract	0.878516	1	0
155	Malignant neoplasm of liver and intrahepatic bile ducts	751	Other congenital anomalies of digestive system	2.40794	2.40794	0.878773
155	Malignant neoplasm of liver and intrahepatic bile ducts	752	Congenital anomalies of genital organs	0.443382	1	0
155	Malignant neoplasm of liver and intrahepatic bile ducts	753	Congenital anomalies of urinary system	1.95899	1.95899	0.672429
155	Malignant neoplasm of liver and intrahepatic bile ducts	754	Certain congenital musculoskeletal deformities	0.256961	1	0
155	Malignant neoplasm of liver and intrahepatic bile ducts	755	Other congenital anomalies of limbs	0.987887	1	0
155	Malignant neoplasm of liver and intrahepatic bile ducts	756	Other congenital musculoskeletal anomalies	0.518073	1	0
155	Malignant neoplasm of liver and intrahepatic bile ducts	757	Congenital anomalies of the integument	0.599929	1	0
155	Malignant neoplasm of liver and intrahepatic bile ducts	758	Chromosomal anomalies	0	1	0
155	Malignant neoplasm of liver and intrahepatic bile ducts	759	Other and unspecified congenital anomalies	2.49043	2.49043	0.912456
155	Malignant neoplasm of liver and intrahepatic bile ducts	762	Fetus or newborn affected by complications of placenta, cord, and membranes	0	1	0
155	Malignant neoplasm of liver and intrahepatic bile ducts	763	Fetus or newborn affected by other complications of labor and delivery	0	1	0
155	Malignant neoplasm of liver and intrahepatic bile ducts	764	Slow fetal growth and fetal malnutrition	0	1	0
155	Malignant neoplasm of liver and intrahepatic bile ducts	774	Other perinatal jaundice	0	1	0
155	Malignant neoplasm of liver and intrahepatic bile ducts	780	General symptoms	1.17377	1.17377	0.160223
155	Malignant neoplasm of liver and intrahepatic bile ducts	781	Symptoms involving nervous and musculoskeletal systems	0.896022	1	0
155	Malignant neoplasm of liver and intrahepatic bile ducts	782	Symptoms involving skin and other integumentary tissue	5.37556	5.37556	1.68186
155	Malignant neoplasm of liver and intrahepatic bile ducts	783	Symptoms concerning nutrition, metabolism, and development	3.25173	3.25173	1.17919
155	Malignant neoplasm of liver and intrahepatic bile ducts	784	Symptoms involving head and neck	0.779048	0.779048	-0.249682
155	Malignant neoplasm of liver and intrahepatic bile ducts	786	Symptoms involving respiratory system and other chest symptoms	0.846563	0.846563	-0.166571
155	Malignant neoplasm of liver and intrahepatic bile ducts	787	Symptoms involving digestive system	1.77847	1.77847	0.575756
155	Malignant neoplasm of liver and intrahepatic bile ducts	788	Symptoms involving urinary system	1.00157	1	0
155	Malignant neoplasm of liver and intrahepatic bile ducts	790	Nonspecific findings on examination of blood	1.49302	1.49302	0.400799
155	Malignant neoplasm of liver and intrahepatic bile ducts	791	Nonspecific findings on examination of urine	0.981192	1	0
155	Malignant neoplasm of liver and intrahepatic bile ducts	795	Other and nonspecific abnormal cytological, histological, immunological and DNA test findings	1.1185	1	0
155	Malignant neoplasm of liver and intrahepatic bile ducts	798	Sudden death, cause unknown	3.16763	1	0
155	Malignant neoplasm of liver and intrahepatic bile ducts	974	Poisoning by water, mineral, and uric acid metabolism drugs	0.411866	1	0
155	Malignant neoplasm of liver and intrahepatic bile ducts	982	Toxic effect of solvents other than petroleum based	0	1	0
155	Malignant neoplasm of liver and intrahepatic bile ducts	984	Toxic effect of lead and its compounds (including fumes)	0	1	0
155	Malignant neoplasm of liver and intrahepatic bile ducts	995	Certain adverse effects not elsewhere classified	1.05208	1	0
155	Malignant neoplasm of liver and intrahepatic bile ducts	996	Complications peculiar to certain specified procedures	2.01861	2.01861	0.702407
162	Malignant neoplasm of trachea, bronchus, and lung	011	Pulmonary tuberculosis	4.69563	4.69563	1.54663
162	Malignant neoplasm of trachea, bronchus, and lung	027	Other zoonotic bacterial diseases	1.10834	1	0
162	Malignant neoplasm of trachea, bronchus, and lung	030	Leprosy	0.786454	1	0
162	Malignant neoplasm of trachea, bronchus, and lung	031	Diseases due to other mycobacteria	3.48624	3.48624	1.24882
162	Malignant neoplasm of trachea, bronchus, and lung	041	Bacterial infection in conditions classified elsewhere and of unspecified site	0.930786	0.930786	-0.0717258
162	Malignant neoplasm of trachea, bronchus, and lung	042	Human immunodeficiency virus [HIV] disease	0.859916	1	0
162	Malignant neoplasm of trachea, bronchus, and lung	046	Slow virus infection of central nervous system	1.44405	1	0
162	Malignant neoplasm of trachea, bronchus, and lung	061	Dengue	0	1	0
162	Malignant neoplasm of trachea, bronchus, and lung	078	Other diseases due to viruses and Chlamydiae	0.838339	1	0
162	Malignant neoplasm of trachea, bronchus, and lung	079	Viral and chlamydial infection in conditions classified elsewhere and of unspecified site	0.603251	0.603251	-0.505422
162	Malignant neoplasm of trachea, bronchus, and lung	084	Malaria	0.429756	1	0
162	Malignant neoplasm of trachea, bronchus, and lung	094	Neurosyphilis	0.75122	1	0
162	Malignant neoplasm of trachea, bronchus, and lung	117	Other mycoses	2.90051	2.90051	1.06489
162	Malignant neoplasm of trachea, bronchus, and lung	135	Sarcoidosis	1.4914	1.4914	0.399717
162	Malignant neoplasm of trachea, bronchus, and lung	143	Malignant neoplasm of gum	1.75578	1.75578	0.562913
162	Malignant neoplasm of trachea, bronchus, and lung	150	Malignant neoplasm of esophagus	2.16989	2.16989	0.774678
162	Malignant neoplasm of trachea, bronchus, and lung	153	Malignant neoplasm of colon	0.762531	0.762531	-0.271112
162	Malignant neoplasm of trachea, bronchus, and lung	157	Malignant neoplasm of pancreas	0.977021	1	0
162	Malignant neoplasm of trachea, bronchus, and lung	158	Malignant neoplasm of retroperitoneum and peritoneum	0.938983	1	0
162	Malignant neoplasm of trachea, bronchus, and lung	161	Malignant neoplasm of larynx	4.71053	4.71053	1.5498
162	Malignant neoplasm of trachea, bronchus, and lung	163	Malignant neoplasm of pleura	24.0561	24.0561	3.18039
162	Malignant neoplasm of trachea, bronchus, and lung	164	Malignant neoplasm of thymus, heart, and mediastinum	23.2934	23.2934	3.14817
162	Malignant neoplasm of trachea, bronchus, and lung	170	Malignant neoplasm of bone and articular cartilage	4.24989	4.24989	1.44689
162	Malignant neoplasm of trachea, bronchus, and lung	171	Malignant neoplasm of connective and other soft tissue	2.52269	2.52269	0.925326
162	Malignant neoplasm of trachea, bronchus, and lung	172	Malignant melanoma of skin	1.21729	1.21729	0.196629
162	Malignant neoplasm of trachea, bronchus, and lung	173	Other malignant neoplasm of skin	1.38589	1.38589	0.326343
162	Malignant neoplasm of trachea, bronchus, and lung	174	Malignant neoplasm of female breast	0.535848	0.535848	-0.623904
162	Malignant neoplasm of trachea, bronchus, and lung	176	Kaposi's sarcoma	2.35465	2.35465	0.856394
162	Malignant neoplasm of trachea, bronchus, and lung	182	Malignant neoplasm of body of uterus	0.345222	0.345222	-1.06357
162	Malignant neoplasm of trachea, bronchus, and lung	183	Malignant neoplasm of ovary and other uterine adnexa	0.53638	0.53638	-0.622912
162	Malignant neoplasm of trachea, bronchus, and lung	185	Malignant neoplasm of prostate	0.846248	0.846248	-0.166943
162	Malignant neoplasm of trachea, bronchus, and lung	186	Malignant neoplasm of testis	2.0853	2.0853	0.73491
162	Malignant neoplasm of trachea, bronchus, and lung	188	Malignant neoplasm of bladder	1.22716	1.22716	0.204701
162	Malignant neoplasm of trachea, bronchus, and lung	189	Malignant neoplasm of kidney and other and unspecified urinary organs	1.40376	1.40376	0.339151
162	Malignant neoplasm of trachea, bronchus, and lung	190	Malignant neoplasm of eye	1.03617	1	0
162	Malignant neoplasm of trachea, bronchus, and lung	191	Malignant neoplasm of brain	4.26153	4.26153	1.44963
162	Malignant neoplasm of trachea, bronchus, and lung	192	Malignant neoplasm of other and unspecified parts of nervous system	4.22966	4.22966	1.44212
162	Malignant neoplasm of trachea, bronchus, and lung	193	Malignant neoplasm of thyroid gland	1.09878	1	0
162	Malignant neoplasm of trachea, bronchus, and lung	194	Malignant neoplasm of other endocrine glands and related structures	4.87343	4.87343	1.5838
162	Malignant neoplasm of trachea, bronchus, and lung	199	Malignant neoplasm without specification of site	8.91189	8.91189	2.18739
162	Malignant neoplasm of trachea, bronchus, and lung	200	Lymphosarcoma and reticulosarcoma and other specified malignant tumors of lymphatic tissue	1.04511	1	0
162	Malignant neoplasm of trachea, bronchus, and lung	201	Hodgkin's disease	1.4061	1.4061	0.340823
162	Malignant neoplasm of trachea, bronchus, and lung	202	Other malignant neoplasms of lymphoid and histiocytic tissue	1.32388	1.32388	0.280564
162	Malignant neoplasm of trachea, bronchus, and lung	203	Multiple myeloma and immunoproliferative neoplasms	0.72858	0.72858	-0.316658
162	Malignant neoplasm of trachea, bronchus, and lung	204	Lymphoid leukemia	1.18469	1.18469	0.169482
162	Malignant neoplasm of trachea, bronchus, and lung	205	Myeloid leukemia	0.881299	1	0
162	Malignant neoplasm of trachea, bronchus, and lung	207	Other specified leukemia	0.338989	1	0
162	Malignant neoplasm of trachea, bronchus, and lung	208	Leukemia of unspecified cell type	1.09101	1	0
162	Malignant neoplasm of trachea, bronchus, and lung	210	Benign neoplasm of lip, oral cavity, and pharynx	0.808015	0.808015	-0.213174
162	Malignant neoplasm of trachea, bronchus, and lung	211	Benign neoplasm of other parts of digestive system	0.890444	0.890444	-0.116035
162	Malignant neoplasm of trachea, bronchus, and lung	213	Benign neoplasm of bone and articular cartilage	0.789094	1	0
162	Malignant neoplasm of trachea, bronchus, and lung	214	Lipoma	0.889724	1	0
162	Malignant neoplasm of trachea, bronchus, and lung	215	Other benign neoplasm of connective and other soft tissue	1.00868	1	0
162	Malignant neoplasm of trachea, bronchus, and lung	216	Benign neoplasm of skin	1.02392	1	0
162	Malignant neoplasm of trachea, bronchus, and lung	217	Benign neoplasm of breast	1.05303	1	0
162	Malignant neoplasm of trachea, bronchus, and lung	218	Uterine leiomyoma	0.298814	0.298814	-1.20794
162	Malignant neoplasm of trachea, bronchus, and lung	227	Benign neoplasm of other endocrine glands and related structures	0.993347	1	0
162	Malignant neoplasm of trachea, bronchus, and lung	228	Hemangioma and lymphangioma, any site	1.30295	1.30295	0.264631
162	Malignant neoplasm of trachea, bronchus, and lung	231	Carcinoma in situ of respiratory system	27.6291	27.6291	3.31887
162	Malignant neoplasm of trachea, bronchus, and lung	235	Neoplasm of uncertain behavior of digestive and respiratory systems	3.47886	3.47886	1.2467
162	Malignant neoplasm of trachea, bronchus, and lung	236	Neoplasm of uncertain behavior of genitourinary organs	1.00564	1	0
162	Malignant neoplasm of trachea, bronchus, and lung	237	Neoplasm of uncertain behavior of endocrine glands and nervous system	1.88611	1.88611	0.634514
162	Malignant neoplasm of trachea, bronchus, and lung	238	Neoplasm of uncertain behavior of other and unspecified sites and tissues	1.13465	1.13465	0.12632
162	Malignant neoplasm of trachea, bronchus, and lung	239	Neoplasms of unspecified nature	5.1789	5.1789	1.64459
162	Malignant neoplasm of trachea, bronchus, and lung	240	Simple and unspecified goiter	1.06441	1	0
162	Malignant neoplasm of trachea, bronchus, and lung	242	Thyrotoxicosis with or without goiter	0.896405	0.896405	-0.109363
162	Malignant neoplasm of trachea, bronchus, and lung	243	Congenital hypothyroidism	1.12351	1	0
162	Malignant neoplasm of trachea, bronchus, and lung	244	Acquired hypothyroidism	0.799305	0.799305	-0.224013
162	Malignant neoplasm of trachea, bronchus, and lung	245	Thyroiditis	0.666214	0.666214	-0.406145
162	Malignant neoplasm of trachea, bronchus, and lung	246	Other disorders of thyroid	0.831699	1	0
162	Malignant neoplasm of trachea, bronchus, and lung	250	Diabetes mellitus	0.789686	0.789686	-0.23612
162	Malignant neoplasm of trachea, bronchus, and lung	251	Other disorders of pancreatic internal secretion	0.986164	1	0
162	Malignant neoplasm of trachea, bronchus, and lung	252	Disorders of parathyroid gland	0.622854	0.622854	-0.473442
162	Malignant neoplasm of trachea, bronchus, and lung	253	Disorders of the pituitary gland and its hypothalamic control	4.23629	4.23629	1.44369
162	Malignant neoplasm of trachea, bronchus, and lung	255	Disorders of adrenal glands	2.22055	2.22055	0.797754
162	Malignant neoplasm of trachea, bronchus, and lung	256	Ovarian dysfunction	0.295882	0.295882	-1.21779
162	Malignant neoplasm of trachea, bronchus, and lung	257	Testicular dysfunction	1.13608	1	0
162	Malignant neoplasm of trachea, bronchus, and lung	258	Polyglandular dysfunction and related disorders	1.13858	1	0
162	Malignant neoplasm of trachea, bronchus, and lung	259	Other endocrine disorders	2.09809	2.09809	0.74103
162	Malignant neoplasm of trachea, bronchus, and lung	260	Kwashiorkor	2.09745	2.09745	0.740723
162	Malignant neoplasm of trachea, bronchus, and lung	264	Vitamin A deficiency	0.524303	1	0
162	Malignant neoplasm of trachea, bronchus, and lung	265	Thiamine and niacin deficiency states	0.956757	1	0
162	Malignant neoplasm of trachea, bronchus, and lung	266	Deficiency of B-complex components	0.631163	0.631163	-0.46019
162	Malignant neoplasm of trachea, bronchus, and lung	267	Ascorbic acid deficiency	1.88327	1	0
162	Malignant neoplasm of trachea, bronchus, and lung	268	Vitamin D deficiency	0.585159	1	0
162	Malignant neoplasm of trachea, bronchus, and lung	269	Other nutritional deficiencies	1.55109	1.55109	0.438958
162	Malignant neoplasm of trachea, bronchus, and lung	270	Disorders of amino-acid transport and metabolism	1.15939	1	0
162	Malignant neoplasm of trachea, bronchus, and lung	271	Disorders of carbohydrate transport and metabolism	0.94147	1	0
162	Malignant neoplasm of trachea, bronchus, and lung	272	Disorders of lipoid metabolism	0.624822	0.624822	-0.470288
162	Malignant neoplasm of trachea, bronchus, and lung	273	Disorders of plasma protein metabolism	1.46971	1.46971	0.385067
162	Malignant neoplasm of trachea, bronchus, and lung	274	Gout	0.829399	0.829399	-0.187054
162	Malignant neoplasm of trachea, bronchus, and lung	275	Disorders of mineral metabolism	2.71688	2.71688	0.999484
162	Malignant neoplasm of trachea, bronchus, and lung	276	Disorders of fluid, electrolyte, and acid-base balance	1.45201	1.45201	0.372948
162	Malignant neoplasm of trachea, bronchus, and lung	277	Other and unspecified disorders of metabolism	1.06988	1	0
162	Malignant neoplasm of trachea, bronchus, and lung	278	Overweight, obesity and other hyperalimentation	0.536784	0.536784	-0.62216
162	Malignant neoplasm of trachea, bronchus, and lung	279	Disorders involving the immune mechanism	1.47185	1.47185	0.386522
162	Malignant neoplasm of trachea, bronchus, and lung	280	Iron deficiency anemias	1.01361	1	0
162	Malignant neoplasm of trachea, bronchus, and lung	281	Other deficiency anemias	0.930267	0.930267	-0.0722832
162	Malignant neoplasm of trachea, bronchus, and lung	282	Hereditary hemolytic anemias	0.987562	1	0
162	Malignant neoplasm of trachea, bronchus, and lung	283	Acquired hemolytic anemias	1.08554	1	0
162	Malignant neoplasm of trachea, bronchus, and lung	284	Aplastic anemia and other bone marrow failure syndromes	5.17454	5.17454	1.64375
162	Malignant neoplasm of trachea, bronchus, and lung	285	Other and unspecified anemias	1.29832	1.29832	0.26107
162	Malignant neoplasm of trachea, bronchus, and lung	286	Coagulation defects	1.09671	1.09671	0.0923141
162	Malignant neoplasm of trachea, bronchus, and lung	287	Purpura and other hemorrhagic conditions	2.04884	2.04884	0.717275
162	Malignant neoplasm of trachea, bronchus, and lung	288	Diseases of white blood cells	4.15284	4.15284	1.42379
162	Malignant neoplasm of trachea, bronchus, and lung	289	Other diseases of blood and blood-forming organs	1.81292	1.81292	0.594938
162	Malignant neoplasm of trachea, bronchus, and lung	290	Dementias	0.481213	0.481213	-0.731446
162	Malignant neoplasm of trachea, bronchus, and lung	291	Alcohol-induced mental disorders	1.38131	1.38131	0.323034
162	Malignant neoplasm of trachea, bronchus, and lung	294	Persistent mental disorders due to conditions classified elsewhere	0.730577	0.730577	-0.31392
162	Malignant neoplasm of trachea, bronchus, and lung	295	Schizophrenic disorders	0.684633	0.684633	-0.378873
162	Malignant neoplasm of trachea, bronchus, and lung	296	Episodic mood disorders	0.771925	0.771925	-0.258868
162	Malignant neoplasm of trachea, bronchus, and lung	299	Pervasive developmental disorders	0.404555	1	0
162	Malignant neoplasm of trachea, bronchus, and lung	300	Anxiety, dissociative and somatoform disorders	1.12269	1.12269	0.115729
162	Malignant neoplasm of trachea, bronchus, and lung	301	Personality disorders	0.68074	0.68074	-0.384575
162	Malignant neoplasm of trachea, bronchus, and lung	302	Sexual and gender identity disorders	0.739781	1	0
162	Malignant neoplasm of trachea, bronchus, and lung	303	Alcohol dependence syndrome	1.45299	1.45299	0.373621
162	Malignant neoplasm of trachea, bronchus, and lung	304	Drug dependence	1.26403	1.26403	0.234309
162	Malignant neoplasm of trachea, bronchus, and lung	307	Special symptoms or syndromes, not elsewhere classified	0.85928	0.85928	-0.15166
162	Malignant neoplasm of trachea, bronchus, and lung	311	Depressive disorder, not elsewhere classified	1.18514	1.18514	0.16986
162	Malignant neoplasm of trachea, bronchus, and lung	314	Hyperkinetic syndrome of childhood	1.33751	1	0
162	Malignant neoplasm of trachea, bronchus, and lung	319	Unspecified mental retardation	0.487619	0.487619	-0.718221
162	Malignant neoplasm of trachea, bronchus, and lung	322	Meningitis of unspecified cause	0.786496	1	0
162	Malignant neoplasm of trachea, bronchus, and lung	323	Encephalitis, myelitis, and encephalomyelitis	2.03001	2.03001	0.708039
162	Malignant neoplasm of trachea, bronchus, and lung	327	Organic sleep disorders	0	1	0
162	Malignant neoplasm of trachea, bronchus, and lung	330	Cerebral degenerations usually manifest in childhood	0.910248	1	0
162	Malignant neoplasm of trachea, bronchus, and lung	331	Other cerebral degenerations	0.584515	0.584515	-0.536972
162	Malignant neoplasm of trachea, bronchus, and lung	332	Parkinson's disease	0.467434	0.467434	-0.760497
162	Malignant neoplasm of trachea, bronchus, and lung	333	Other extrapyramidal disease and abnormal movement disorders	0.710068	0.710068	-0.342395
162	Malignant neoplasm of trachea, bronchus, and lung	334	Spinocerebellar disease	1.53711	1.53711	0.429902
162	Malignant neoplasm of trachea, bronchus, and lung	335	Anterior horn cell disease	0.621927	0.621927	-0.474932
162	Malignant neoplasm of trachea, bronchus, and lung	337	Disorders of the autonomic nervous system	0.8496	0.8496	-0.162989
162	Malignant neoplasm of trachea, bronchus, and lung	340	Multiple sclerosis	0.726771	0.726771	-0.319144
162	Malignant neoplasm of trachea, bronchus, and lung	341	Other demyelinating diseases of central nervous system	1.04311	1	0
162	Malignant neoplasm of trachea, bronchus, and lung	342	Hemiplegia and hemiparesis	0.77974	0.77974	-0.248795
162	Malignant neoplasm of trachea, bronchus, and lung	345	Epilepsy and recurrent seizures	1.1957	1.1957	0.178735
162	Malignant neoplasm of trachea, bronchus, and lung	346	Migraine	0.601839	0.601839	-0.507765
162	Malignant neoplasm of trachea, bronchus, and lung	347	Cataplexy and narcolepsy	0.983419	1	0
162	Malignant neoplasm of trachea, bronchus, and lung	348	Other conditions of brain	1.47363	1.47363	0.387727
162	Malignant neoplasm of trachea, bronchus, and lung	349	Other and unspecified disorders of the nervous system	1.03453	1	0
162	Malignant neoplasm of trachea, bronchus, and lung	351	Facial nerve disorders	0.817728	0.817728	-0.201225
162	Malignant neoplasm of trachea, bronchus, and lung	354	Mononeuritis of upper limb and mononeuritis multiplex	0.857103	0.857103	-0.154197
162	Malignant neoplasm of trachea, bronchus, and lung	355	Mononeuritis of lower limb	1.10244	1	0
162	Malignant neoplasm of trachea, bronchus, and lung	356	Hereditary and idiopathic peripheral neuropathy	1.24728	1.24728	0.220966
162	Malignant neoplasm of trachea, bronchus, and lung	358	Myoneural disorders	1.3917	1.3917	0.330523
162	Malignant neoplasm of trachea, bronchus, and lung	359	Muscular dystrophies and other myopathies	1.83362	1.83362	0.606294
162	Malignant neoplasm of trachea, bronchus, and lung	361	Retinal detachments and defects	0.5481	0.5481	-0.601297
162	Malignant neoplasm of trachea, bronchus, and lung	362	Other retinal disorders	0.614983	0.614983	-0.486161
162	Malignant neoplasm of trachea, bronchus, and lung	363	Chorioretinal inflammations, scars, and other disorders of choroid	0.517259	0.517259	-0.659211
162	Malignant neoplasm of trachea, bronchus, and lung	365	Glaucoma	0.793845	0.793845	-0.230867
162	Malignant neoplasm of trachea, bronchus, and lung	366	Cataract	0.670877	0.670877	-0.399169
162	Malignant neoplasm of trachea, bronchus, and lung	368	Visual disturbances	0.897479	0.897479	-0.108166
162	Malignant neoplasm of trachea, bronchus, and lung	370	Keratitis	0.675583	0.675583	-0.392179
162	Malignant neoplasm of trachea, bronchus, and lung	371	Corneal opacity and other disorders of cornea	0.520612	0.520612	-0.652751
162	Malignant neoplasm of trachea, bronchus, and lung	374	Other disorders of eyelids	1.06238	1	0
162	Malignant neoplasm of trachea, bronchus, and lung	377	Disorders of optic nerve and visual pathways	0.704434	0.704434	-0.35036
162	Malignant neoplasm of trachea, bronchus, and lung	378	Strabismus and other disorders of binocular eye movements	0.910454	1	0
162	Malignant neoplasm of trachea, bronchus, and lung	386	Vertiginous syndromes and other disorders of vestibular system	0.489148	0.489148	-0.715091
162	Malignant neoplasm of trachea, bronchus, and lung	389	Hearing loss	0.893776	0.893776	-0.1123
162	Malignant neoplasm of trachea, bronchus, and lung	401	Essential hypertension	0.834961	0.834961	-0.18037
162	Malignant neoplasm of trachea, bronchus, and lung	403	Hypertensive chronic kidney disease	0.721677	0.721677	-0.326178
162	Malignant neoplasm of trachea, bronchus, and lung	405	Secondary hypertension	0.742303	0.742303	-0.297998
162	Malignant neoplasm of trachea, bronchus, and lung	410	Acute myocardial infarction	0.668497	0.668497	-0.402724
162	Malignant neoplasm of trachea, bronchus, and lung	414	Other forms of chronic ischemic heart disease	0.840302	0.840302	-0.173994
162	Malignant neoplasm of trachea, bronchus, and lung	416	Chronic pulmonary heart disease	1.56274	1.56274	0.446442
162	Malignant neoplasm of trachea, bronchus, and lung	425	Cardiomyopathy	0.851496	0.851496	-0.160761
162	Malignant neoplasm of trachea, bronchus, and lung	426	Conduction disorders	0.722493	0.722493	-0.325047
162	Malignant neoplasm of trachea, bronchus, and lung	427	Cardiac dysrhythmias	1.07899	1.07899	0.0760278
162	Malignant neoplasm of trachea, bronchus, and lung	428	Heart failure	0.995134	1	0
162	Malignant neoplasm of trachea, bronchus, and lung	434	Occlusion of cerebral arteries	0.671315	0.671315	-0.398517
162	Malignant neoplasm of trachea, bronchus, and lung	435	Transient cerebral ischemia	0.572687	0.572687	-0.557416
162	Malignant neoplasm of trachea, bronchus, and lung	437	Other and ill-defined cerebrovascular disease	0.65339	0.65339	-0.425581
162	Malignant neoplasm of trachea, bronchus, and lung	440	Atherosclerosis	0.967039	0.967039	-0.0335163
162	Malignant neoplasm of trachea, bronchus, and lung	441	Aortic aneurysm and dissection	1.59122	1.59122	0.4645
162	Malignant neoplasm of trachea, bronchus, and lung	443	Other peripheral vascular disease	1.23301	1.23301	0.209455
162	Malignant neoplasm of trachea, bronchus, and lung	446	Polyarteritis nodosa and allied conditions	0.682823	0.682823	-0.381519
162	Malignant neoplasm of trachea, bronchus, and lung	448	Disease of capillaries	1.16871	1	0
162	Malignant neoplasm of trachea, bronchus, and lung	453	Other venous embolism and thrombosis	1.48547	1.48547	0.395728
162	Malignant neoplasm of trachea, bronchus, and lung	457	Noninfectious disorders of lymphatic channels	1.02925	1	0
162	Malignant neoplasm of trachea, bronchus, and lung	477	Allergic rhinitis	0.939493	1	0
162	Malignant neoplasm of trachea, bronchus, and lung	480	Viral pneumonia	0.97399	1	0
162	Malignant neoplasm of trachea, bronchus, and lung	482	Other bacterial pneumonia	2.78292	2.78292	1.0235
162	Malignant neoplasm of trachea, bronchus, and lung	492	Emphysema	3.70439	3.70439	1.30952
162	Malignant neoplasm of trachea, bronchus, and lung	493	Asthma	1.25754	1.25754	0.229161
162	Malignant neoplasm of trachea, bronchus, and lung	496	Chronic airway obstruction, not elsewhere classified	2.93389	2.93389	1.07633
162	Malignant neoplasm of trachea, bronchus, and lung	503	Pneumoconiosis due to other inorganic dust	3.72049	3.72049	1.31386
162	Malignant neoplasm of trachea, bronchus, and lung	512	Pneumothorax	10.0102	10.0102	2.3036
162	Malignant neoplasm of trachea, bronchus, and lung	515	Postinflammatory pulmonary fibrosis	2.21464	2.21464	0.795088
162	Malignant neoplasm of trachea, bronchus, and lung	516	Other alveolar and parietoalveolar pneumonopathy	2.69064	2.69064	0.989778
162	Malignant neoplasm of trachea, bronchus, and lung	518	Other diseases of lung	3.01534	3.01534	1.10371
162	Malignant neoplasm of trachea, bronchus, and lung	520	Disorders of tooth development and eruption	0.523837	1	0
162	Malignant neoplasm of trachea, bronchus, and lung	523	Gingival and periodontal diseases	0.999864	1	0
162	Malignant neoplasm of trachea, bronchus, and lung	526	Diseases of the jaws	0.975304	1	0
162	Malignant neoplasm of trachea, bronchus, and lung	528	Diseases of the oral soft tissues, excluding lesions specific for gingiva and tongue	2.84133	2.84133	1.04427
162	Malignant neoplasm of trachea, bronchus, and lung	555	Regional enteritis	0.795468	0.795468	-0.228825
162	Malignant neoplasm of trachea, bronchus, and lung	569	Other disorders of intestine	0.832318	0.832318	-0.183541
162	Malignant neoplasm of trachea, bronchus, and lung	571	Chronic liver disease and cirrhosis	1.00677	1	0
162	Malignant neoplasm of trachea, bronchus, and lung	572	Liver abscess and sequelae of chronic liver disease	1.04993	1	0
162	Malignant neoplasm of trachea, bronchus, and lung	574	Cholelithiasis	0.619196	0.619196	-0.479334
162	Malignant neoplasm of trachea, bronchus, and lung	576	Other disorders of biliary tract	0.686439	0.686439	-0.376238
162	Malignant neoplasm of trachea, bronchus, and lung	577	Diseases of pancreas	0.734487	0.734487	-0.308583
162	Malignant neoplasm of trachea, bronchus, and lung	579	Intestinal malabsorption	0.76769	0.76769	-0.264369
162	Malignant neoplasm of trachea, bronchus, and lung	581	Nephrotic syndrome	0.805826	0.805826	-0.215887
162	Malignant neoplasm of trachea, bronchus, and lung	583	Nephritis and nephropathy, not specified as acute or chronic	0.504455	0.504455	-0.684276
162	Malignant neoplasm of trachea, bronchus, and lung	586	Renal failure, unspecified	1.01471	1	0
162	Malignant neoplasm of trachea, bronchus, and lung	587	Renal sclerosis, unspecified	0.977902	1	0
162	Malignant neoplasm of trachea, bronchus, and lung	588	Disorders resulting from impaired renal function	0.767673	0.767673	-0.264391
162	Malignant neoplasm of trachea, bronchus, and lung	592	Calculus of kidney and ureter	0.602335	0.602335	-0.506941
162	Malignant neoplasm of trachea, bronchus, and lung	593	Other disorders of kidney and ureter	0.987223	1	0
162	Malignant neoplasm of trachea, bronchus, and lung	599	Other disorders of urethra and urinary tract	0.856808	0.856808	-0.154542
162	Malignant neoplasm of trachea, bronchus, and lung	606	Infertility, male	0.833108	1	0
162	Malignant neoplasm of trachea, bronchus, and lung	623	Noninflammatory disorders of vagina	0.599173	0.599173	-0.512205
162	Malignant neoplasm of trachea, bronchus, and lung	628	Infertility, female	0.265335	1	0
162	Malignant neoplasm of trachea, bronchus, and lung	641	Antepartum hemorrhage, abruptio placentae, and placenta previa	0	1	0
162	Malignant neoplasm of trachea, bronchus, and lung	642	Hypertension complicating pregnancy, childbirth, and the puerperium	0.873838	1	0
162	Malignant neoplasm of trachea, bronchus, and lung	648	Other current conditions in the mother classifiable elsewhere, but complicating pregnancy, childbirth, or the puerperium	0	1	0
162	Malignant neoplasm of trachea, bronchus, and lung	686	Other local infections of skin and subcutaneous tissue	0.776924	0.776924	-0.252413
162	Malignant neoplasm of trachea, bronchus, and lung	690	Erythematosquamous dermatosis	1.03808	1	0
162	Malignant neoplasm of trachea, bronchus, and lung	692	Contact dermatitis and other eczema	0.999801	1	0
162	Malignant neoplasm of trachea, bronchus, and lung	695	Erythematous conditions	1.03603	1	0
162	Malignant neoplasm of trachea, bronchus, and lung	696	Psoriasis and similar disorders	1.06386	1	0
162	Malignant neoplasm of trachea, bronchus, and lung	701	Other hypertrophic and atrophic conditions of skin	0.732449	0.732449	-0.311362
162	Malignant neoplasm of trachea, bronchus, and lung	702	Other dermatoses	1.20542	1.20542	0.186828
162	Malignant neoplasm of trachea, bronchus, and lung	703	Diseases of nail	1.05728	1	0
162	Malignant neoplasm of trachea, bronchus, and lung	704	Diseases of hair and hair follicles	2.89939	2.89939	1.0645
162	Malignant neoplasm of trachea, bronchus, and lung	706	Diseases of sebaceous glands	1.37492	1.37492	0.318396
162	Malignant neoplasm of trachea, bronchus, and lung	708	Urticaria	0.935326	1	0
162	Malignant neoplasm of trachea, bronchus, and lung	709	Other disorders of skin and subcutaneous tissue	0.948928	1	0
162	Malignant neoplasm of trachea, bronchus, and lung	710	Diffuse diseases of connective tissue	0.937452	1	0
162	Malignant neoplasm of trachea, bronchus, and lung	714	Rheumatoid arthritis and other inflammatory polyarthropathies	0.864663	0.864663	-0.145415
162	Malignant neoplasm of trachea, bronchus, and lung	715	Osteoarthrosis and allied disorders	0.544633	0.544633	-0.607644
162	Malignant neoplasm of trachea, bronchus, and lung	716	Other and unspecified arthropathies	0.75362	0.75362	-0.282868
162	Malignant neoplasm of trachea, bronchus, and lung	718	Other derangement of joint	0.442932	0.442932	-0.81434
162	Malignant neoplasm of trachea, bronchus, and lung	720	Ankylosing spondylitis and other inflammatory spondylopathies	0.67221	0.67221	-0.397185
162	Malignant neoplasm of trachea, bronchus, and lung	722	Intervertebral disc disorders	0.666198	0.666198	-0.406168
162	Malignant neoplasm of trachea, bronchus, and lung	723	Other disorders of cervical region	0.975	1	0
162	Malignant neoplasm of trachea, bronchus, and lung	724	Other and unspecified disorders of back	0.811951	0.811951	-0.208316
162	Malignant neoplasm of trachea, bronchus, and lung	726	Peripheral enthesopathies and allied syndromes	0.593094	0.593094	-0.522402
162	Malignant neoplasm of trachea, bronchus, and lung	727	Other disorders of synovium, tendon, and bursa	0.394144	0.394144	-0.931039
162	Malignant neoplasm of trachea, bronchus, and lung	728	Disorders of muscle, ligament, and fascia	0.88971	0.88971	-0.11686
162	Malignant neoplasm of trachea, bronchus, and lung	729	Other disorders of soft tissues	0.938342	0.938342	-0.0636404
162	Malignant neoplasm of trachea, bronchus, and lung	731	Osteitis deformans and osteopathies associated with other disorders classified elsewhere	1.21546	1.21546	0.195122
162	Malignant neoplasm of trachea, bronchus, and lung	733	Other disorders of bone and cartilage	1.16924	1.16924	0.156353
162	Malignant neoplasm of trachea, bronchus, and lung	741	Spina bifida	0.606832	1	0
162	Malignant neoplasm of trachea, bronchus, and lung	742	Other congenital anomalies of nervous system	0.869731	1	0
162	Malignant neoplasm of trachea, bronchus, and lung	743	Congenital anomalies of eye	0.502206	1	0
162	Malignant neoplasm of trachea, bronchus, and lung	744	Congenital anomalies of ear, face, and neck	0.953972	1	0
162	Malignant neoplasm of trachea, bronchus, and lung	745	Bulbus cordis anomalies and anomalies of cardiac septal closure	0.438921	0.438921	-0.823436
162	Malignant neoplasm of trachea, bronchus, and lung	746	Other congenital anomalies of heart	0.840148	1	0
162	Malignant neoplasm of trachea, bronchus, and lung	747	Other congenital anomalies of circulatory system	0.802347	0.802347	-0.220214
162	Malignant neoplasm of trachea, bronchus, and lung	749	Cleft palate and cleft lip	0.689872	1	0
162	Malignant neoplasm of trachea, bronchus, and lung	750	Other congenital anomalies of upper alimentary tract	0.793152	1	0
162	Malignant neoplasm of trachea, bronchus, and lung	751	Other congenital anomalies of digestive system	0.60388	0.60388	-0.50438
162	Malignant neoplasm of trachea, bronchus, and lung	752	Congenital anomalies of genital organs	0.467016	0.467016	-0.761393
162	Malignant neoplasm of trachea, bronchus, and lung	753	Congenital anomalies of urinary system	0.973436	1	0
162	Malignant neoplasm of trachea, bronchus, and lung	754	Certain congenital musculoskeletal deformities	0.296435	0.296435	-1.21593
162	Malignant neoplasm of trachea, bronchus, and lung	755	Other congenital anomalies of limbs	0.379882	0.379882	-0.967895
162	Malignant neoplasm of trachea, bronchus, and lung	756	Other congenital musculoskeletal anomalies	0.571674	0.571674	-0.559187
162	Malignant neoplasm of trachea, bronchus, and lung	757	Congenital anomalies of the integument	0.812453	1	0
162	Malignant neoplasm of trachea, bronchus, and lung	758	Chromosomal anomalies	0.516046	1	0
162	Malignant neoplasm of trachea, bronchus, and lung	759	Other and unspecified congenital anomalies	1.99861	1.99861	0.692453
162	Malignant neoplasm of trachea, bronchus, and lung	762	Fetus or newborn affected by complications of placenta, cord, and membranes	26.7006	26.7006	3.28469
162	Malignant neoplasm of trachea, bronchus, and lung	763	Fetus or newborn affected by other complications of labor and delivery	0.668754	1	0
162	Malignant neoplasm of trachea, bronchus, and lung	764	Slow fetal growth and fetal malnutrition	0	1	0
162	Malignant neoplasm of trachea, bronchus, and lung	774	Other perinatal jaundice	6.55379	1	0
162	Malignant neoplasm of trachea, bronchus, and lung	780	General symptoms	1.07438	1.07438	0.0717459
162	Malignant neoplasm of trachea, bronchus, and lung	781	Symptoms involving nervous and musculoskeletal systems	0.907193	0.907193	-0.0973998
162	Malignant neoplasm of trachea, bronchus, and lung	782	Symptoms involving skin and other integumentary tissue	1.06011	1.06011	0.0583745
162	Malignant neoplasm of trachea, bronchus, and lung	783	Symptoms concerning nutrition, metabolism, and development	2.25275	2.25275	0.812152
162	Malignant neoplasm of trachea, bronchus, and lung	784	Symptoms involving head and neck	0.893372	0.893372	-0.112752
162	Malignant neoplasm of trachea, bronchus, and lung	786	Symptoms involving respiratory system and other chest symptoms	2.07837	2.07837	0.731586
162	Malignant neoplasm of trachea, bronchus, and lung	787	Symptoms involving digestive system	1.70707	1.70707	0.534777
162	Malignant neoplasm of trachea, bronchus, and lung	788	Symptoms involving urinary system	0.98857	1	0
162	Malignant neoplasm of trachea, bronchus, and lung	790	Nonspecific findings on examination of blood	1.0458	1.0458	0.0447783
162	Malignant neoplasm of trachea, bronchus, and lung	791	Nonspecific findings on examination of urine	0.794995	0.794995	-0.22942
162	Malignant neoplasm of trachea, bronchus, and lung	795	Other and nonspecific abnormal cytological, histological, immunological and DNA test findings	3.08555	3.08555	1.12673
162	Malignant neoplasm of trachea, bronchus, and lung	798	Sudden death, cause unknown	0.953278	1	0
162	Malignant neoplasm of trachea, bronchus, and lung	974	Poisoning by water, mineral, and uric acid metabolism drugs	1.70429	1.70429	0.533151
162	Malignant neoplasm of trachea, bronchus, and lung	982	Toxic effect of solvents other than petroleum based	1.04443	1	0
162	Malignant neoplasm of trachea, bronchus, and lung	984	Toxic effect of lead and its compounds (including fumes)	0.963792	1	0
162	Malignant neoplasm of trachea, bronchus, and lung	995	Certain adverse effects not elsewhere classified	1.08407	1.08407	0.0807194
162	Malignant neoplasm of trachea, bronchus, and lung	996	Complications peculiar to certain specified procedures	0.791279	0.791279	-0.234104
164	Malignant neoplasm of thymus, heart, and mediastinum	011	Pulmonary tuberculosis	2.54723	1	0
164	Malignant neoplasm of thymus, heart, and mediastinum	027	Other zoonotic bacterial diseases	0	1	0
164	Malignant neoplasm of thymus, heart, and mediastinum	030	Leprosy	0	1	0
164	Malignant neoplasm of thymus, heart, and mediastinum	031	Diseases due to other mycobacteria	4.94856	4.94856	1.5991
164	Malignant neoplasm of thymus, heart, and mediastinum	041	Bacterial infection in conditions classified elsewhere and of unspecified site	1.01522	1	0
164	Malignant neoplasm of thymus, heart, and mediastinum	042	Human immunodeficiency virus [HIV] disease	0	1	0
164	Malignant neoplasm of thymus, heart, and mediastinum	046	Slow virus infection of central nervous system	0	1	0
164	Malignant neoplasm of thymus, heart, and mediastinum	061	Dengue	0	1	0
164	Malignant neoplasm of thymus, heart, and mediastinum	078	Other diseases due to viruses and Chlamydiae	2.60227	1	0
164	Malignant neoplasm of thymus, heart, and mediastinum	079	Viral and chlamydial infection in conditions classified elsewhere and of unspecified site	1.06259	1	0
164	Malignant neoplasm of thymus, heart, and mediastinum	084	Malaria	0	1	0
164	Malignant neoplasm of thymus, heart, and mediastinum	094	Neurosyphilis	1.14085	1	0
164	Malignant neoplasm of thymus, heart, and mediastinum	117	Other mycoses	4.49818	4.49818	1.50367
164	Malignant neoplasm of thymus, heart, and mediastinum	135	Sarcoidosis	3.51066	1	0
164	Malignant neoplasm of thymus, heart, and mediastinum	143	Malignant neoplasm of gum	3.17921	1	0
164	Malignant neoplasm of thymus, heart, and mediastinum	150	Malignant neoplasm of esophagus	12.8888	12.8888	2.55636
164	Malignant neoplasm of thymus, heart, and mediastinum	153	Malignant neoplasm of colon	0.937976	1	0
164	Malignant neoplasm of thymus, heart, and mediastinum	157	Malignant neoplasm of pancreas	0	1	0
164	Malignant neoplasm of thymus, heart, and mediastinum	158	Malignant neoplasm of retroperitoneum and peritoneum	5.99403	5.99403	1.79076
164	Malignant neoplasm of thymus, heart, and mediastinum	161	Malignant neoplasm of larynx	2.69078	1	0
164	Malignant neoplasm of thymus, heart, and mediastinum	163	Malignant neoplasm of pleura	72.289	72.289	4.28067
164	Malignant neoplasm of thymus, heart, and mediastinum	170	Malignant neoplasm of bone and articular cartilage	12.8706	12.8706	2.55494
164	Malignant neoplasm of thymus, heart, and mediastinum	171	Malignant neoplasm of connective and other soft tissue	21.0203	21.0203	3.04549
164	Malignant neoplasm of thymus, heart, and mediastinum	172	Malignant melanoma of skin	1.67732	1	0
164	Malignant neoplasm of thymus, heart, and mediastinum	173	Other malignant neoplasm of skin	1.57911	1	0
164	Malignant neoplasm of thymus, heart, and mediastinum	176	Kaposi's sarcoma	14.7805	14.7805	2.69331
164	Malignant neoplasm of thymus, heart, and mediastinum	182	Malignant neoplasm of body of uterus	1.33583	1	0
164	Malignant neoplasm of thymus, heart, and mediastinum	183	Malignant neoplasm of ovary and other uterine adnexa	0.203645	1	0
164	Malignant neoplasm of thymus, heart, and mediastinum	185	Malignant neoplasm of prostate	0.837271	1	0
164	Malignant neoplasm of thymus, heart, and mediastinum	186	Malignant neoplasm of testis	28.0493	28.0493	3.33397
164	Malignant neoplasm of thymus, heart, and mediastinum	188	Malignant neoplasm of bladder	0.954459	1	0
164	Malignant neoplasm of thymus, heart, and mediastinum	189	Malignant neoplasm of kidney and other and unspecified urinary organs	0.863074	1	0
164	Malignant neoplasm of thymus, heart, and mediastinum	190	Malignant neoplasm of eye	2.03256	1	0
164	Malignant neoplasm of thymus, heart, and mediastinum	191	Malignant neoplasm of brain	3.40046	3.40046	1.22391
164	Malignant neoplasm of thymus, heart, and mediastinum	192	Malignant neoplasm of other and unspecified parts of nervous system	2.05285	1	0
164	Malignant neoplasm of thymus, heart, and mediastinum	193	Malignant neoplasm of thyroid gland	12.2138	12.2138	2.50257
164	Malignant neoplasm of thymus, heart, and mediastinum	194	Malignant neoplasm of other endocrine glands and related structures	7.34189	7.34189	1.9936
164	Malignant neoplasm of thymus, heart, and mediastinum	199	Malignant neoplasm without specification of site	12.4433	12.4433	2.52118
164	Malignant neoplasm of thymus, heart, and mediastinum	200	Lymphosarcoma and reticulosarcoma and other specified malignant tumors of lymphatic tissue	4.19858	4.19858	1.43475
164	Malignant neoplasm of thymus, heart, and mediastinum	202	Other malignant neoplasms of lymphoid and histiocytic tissue	5.4295	5.4295	1.69185
164	Malignant neoplasm of thymus, heart, and mediastinum	203	Multiple myeloma and immunoproliferative neoplasms	1.07863	1	0
164	Malignant neoplasm of thymus, heart, and mediastinum	204	Lymphoid leukemia	1.98684	1	0
164	Malignant neoplasm of thymus, heart, and mediastinum	205	Myeloid leukemia	1.31715	1	0
164	Malignant neoplasm of thymus, heart, and mediastinum	207	Other specified leukemia	10.6394	1	0
164	Malignant neoplasm of thymus, heart, and mediastinum	208	Leukemia of unspecified cell type	4.04434	4.04434	1.39732
164	Malignant neoplasm of thymus, heart, and mediastinum	210	Benign neoplasm of lip, oral cavity, and pharynx	0	1	0
164	Malignant neoplasm of thymus, heart, and mediastinum	211	Benign neoplasm of other parts of digestive system	0.983068	1	0
164	Malignant neoplasm of thymus, heart, and mediastinum	213	Benign neoplasm of bone and articular cartilage	0	1	0
164	Malignant neoplasm of thymus, heart, and mediastinum	214	Lipoma	1.63905	1	0
164	Malignant neoplasm of thymus, heart, and mediastinum	215	Other benign neoplasm of connective and other soft tissue	8.63402	8.63402	2.15571
164	Malignant neoplasm of thymus, heart, and mediastinum	216	Benign neoplasm of skin	2.02257	1	0
164	Malignant neoplasm of thymus, heart, and mediastinum	218	Uterine leiomyoma	0.541066	1	0
164	Malignant neoplasm of thymus, heart, and mediastinum	227	Benign neoplasm of other endocrine glands and related structures	0.929113	1	0
164	Malignant neoplasm of thymus, heart, and mediastinum	228	Hemangioma and lymphangioma, any site	2.38681	1	0
164	Malignant neoplasm of thymus, heart, and mediastinum	235	Neoplasm of uncertain behavior of digestive and respiratory systems	6.21948	6.21948	1.82769
164	Malignant neoplasm of thymus, heart, and mediastinum	236	Neoplasm of uncertain behavior of genitourinary organs	0	1	0
164	Malignant neoplasm of thymus, heart, and mediastinum	237	Neoplasm of uncertain behavior of endocrine glands and nervous system	3.25854	1	0
164	Malignant neoplasm of thymus, heart, and mediastinum	238	Neoplasm of uncertain behavior of other and unspecified sites and tissues	1.47528	1	0
164	Malignant neoplasm of thymus, heart, and mediastinum	239	Neoplasms of unspecified nature	8.27351	8.27351	2.11306
164	Malignant neoplasm of thymus, heart, and mediastinum	240	Simple and unspecified goiter	1.28079	1	0
164	Malignant neoplasm of thymus, heart, and mediastinum	242	Thyrotoxicosis with or without goiter	1.21095	1	0
164	Malignant neoplasm of thymus, heart, and mediastinum	243	Congenital hypothyroidism	0	1	0
164	Malignant neoplasm of thymus, heart, and mediastinum	244	Acquired hypothyroidism	1.18499	1	0
164	Malignant neoplasm of thymus, heart, and mediastinum	245	Thyroiditis	2.75731	1	0
164	Malignant neoplasm of thymus, heart, and mediastinum	246	Other disorders of thyroid	0.745813	1	0
164	Malignant neoplasm of thymus, heart, and mediastinum	250	Diabetes mellitus	0.779101	0.779101	-0.249615
164	Malignant neoplasm of thymus, heart, and mediastinum	251	Other disorders of pancreatic internal secretion	1.08256	1	0
164	Malignant neoplasm of thymus, heart, and mediastinum	252	Disorders of parathyroid gland	0.945906	1	0
164	Malignant neoplasm of thymus, heart, and mediastinum	253	Disorders of the pituitary gland and its hypothalamic control	4.95979	4.95979	1.60136
164	Malignant neoplasm of thymus, heart, and mediastinum	255	Disorders of adrenal glands	2.52993	2.52993	0.928191
164	Malignant neoplasm of thymus, heart, and mediastinum	256	Ovarian dysfunction	0	1	0
164	Malignant neoplasm of thymus, heart, and mediastinum	257	Testicular dysfunction	6.68565	1	0
164	Malignant neoplasm of thymus, heart, and mediastinum	258	Polyglandular dysfunction and related disorders	5.22954	1	0
164	Malignant neoplasm of thymus, heart, and mediastinum	259	Other endocrine disorders	6.9316	6.9316	1.93609
164	Malignant neoplasm of thymus, heart, and mediastinum	260	Kwashiorkor	0.565874	1	0
164	Malignant neoplasm of thymus, heart, and mediastinum	264	Vitamin A deficiency	0	1	0
164	Malignant neoplasm of thymus, heart, and mediastinum	265	Thiamine and niacin deficiency states	0	1	0
164	Malignant neoplasm of thymus, heart, and mediastinum	266	Deficiency of B-complex components	1.44948	1	0
164	Malignant neoplasm of thymus, heart, and mediastinum	267	Ascorbic acid deficiency	0	1	0
164	Malignant neoplasm of thymus, heart, and mediastinum	268	Vitamin D deficiency	0	1	0
164	Malignant neoplasm of thymus, heart, and mediastinum	269	Other nutritional deficiencies	1.62877	1	0
164	Malignant neoplasm of thymus, heart, and mediastinum	270	Disorders of amino-acid transport and metabolism	3.03236	1	0
164	Malignant neoplasm of thymus, heart, and mediastinum	271	Disorders of carbohydrate transport and metabolism	1.36117	1	0
164	Malignant neoplasm of thymus, heart, and mediastinum	272	Disorders of lipoid metabolism	0.891519	1	0
164	Malignant neoplasm of thymus, heart, and mediastinum	273	Disorders of plasma protein metabolism	2.083	2.083	0.733811
164	Malignant neoplasm of thymus, heart, and mediastinum	274	Gout	0.814783	1	0
164	Malignant neoplasm of thymus, heart, and mediastinum	275	Disorders of mineral metabolism	2.63166	2.63166	0.967613
164	Malignant neoplasm of thymus, heart, and mediastinum	276	Disorders of fluid, electrolyte, and acid-base balance	1.47335	1.47335	0.387539
164	Malignant neoplasm of thymus, heart, and mediastinum	277	Other and unspecified disorders of metabolism	2.25111	1	0
164	Malignant neoplasm of thymus, heart, and mediastinum	278	Overweight, obesity and other hyperalimentation	0.775779	1	0
164	Malignant neoplasm of thymus, heart, and mediastinum	279	Disorders involving the immune mechanism	6.09166	6.09166	1.80692
164	Malignant neoplasm of thymus, heart, and mediastinum	280	Iron deficiency anemias	0.931153	1	0
164	Malignant neoplasm of thymus, heart, and mediastinum	281	Other deficiency anemias	0.934499	1	0
164	Malignant neoplasm of thymus, heart, and mediastinum	282	Hereditary hemolytic anemias	0.668964	1	0
164	Malignant neoplasm of thymus, heart, and mediastinum	283	Acquired hemolytic anemias	2.65485	2.65485	0.976386
164	Malignant neoplasm of thymus, heart, and mediastinum	284	Aplastic anemia and other bone marrow failure syndromes	9.26353	9.26353	2.22609
164	Malignant neoplasm of thymus, heart, and mediastinum	285	Other and unspecified anemias	1.57252	1.57252	0.452679
164	Malignant neoplasm of thymus, heart, and mediastinum	286	Coagulation defects	1.45974	1	0
164	Malignant neoplasm of thymus, heart, and mediastinum	287	Purpura and other hemorrhagic conditions	2.93796	2.93796	1.07771
164	Malignant neoplasm of thymus, heart, and mediastinum	288	Diseases of white blood cells	5.68125	5.68125	1.73717
164	Malignant neoplasm of thymus, heart, and mediastinum	289	Other diseases of blood and blood-forming organs	1.51614	1	0
164	Malignant neoplasm of thymus, heart, and mediastinum	290	Dementias	0.368371	0.368371	-0.998666
164	Malignant neoplasm of thymus, heart, and mediastinum	291	Alcohol-induced mental disorders	0.733251	1	0
164	Malignant neoplasm of thymus, heart, and mediastinum	294	Persistent mental disorders due to conditions classified elsewhere	0.311733	1	0
164	Malignant neoplasm of thymus, heart, and mediastinum	295	Schizophrenic disorders	0.986679	1	0
164	Malignant neoplasm of thymus, heart, and mediastinum	296	Episodic mood disorders	0.916632	1	0
164	Malignant neoplasm of thymus, heart, and mediastinum	299	Pervasive developmental disorders	0	1	0
164	Malignant neoplasm of thymus, heart, and mediastinum	300	Anxiety, dissociative and somatoform disorders	1.30566	1	0
164	Malignant neoplasm of thymus, heart, and mediastinum	301	Personality disorders	0.681878	1	0
164	Malignant neoplasm of thymus, heart, and mediastinum	302	Sexual and gender identity disorders	0	1	0
164	Malignant neoplasm of thymus, heart, and mediastinum	303	Alcohol dependence syndrome	1.12855	1	0
164	Malignant neoplasm of thymus, heart, and mediastinum	304	Drug dependence	2.06539	1	0
164	Malignant neoplasm of thymus, heart, and mediastinum	307	Special symptoms or syndromes, not elsewhere classified	1.04262	1	0
164	Malignant neoplasm of thymus, heart, and mediastinum	311	Depressive disorder, not elsewhere classified	1.42657	1.42657	0.355271
164	Malignant neoplasm of thymus, heart, and mediastinum	314	Hyperkinetic syndrome of childhood	0	1	0
164	Malignant neoplasm of thymus, heart, and mediastinum	319	Unspecified mental retardation	1.76588	1	0
164	Malignant neoplasm of thymus, heart, and mediastinum	322	Meningitis of unspecified cause	0	1	0
164	Malignant neoplasm of thymus, heart, and mediastinum	323	Encephalitis, myelitis, and encephalomyelitis	3.10796	1	0
164	Malignant neoplasm of thymus, heart, and mediastinum	327	Organic sleep disorders	0	1	0
164	Malignant neoplasm of thymus, heart, and mediastinum	330	Cerebral degenerations usually manifest in childhood	10.7133	1	0
164	Malignant neoplasm of thymus, heart, and mediastinum	331	Other cerebral degenerations	0.446542	0.446542	-0.806222
164	Malignant neoplasm of thymus, heart, and mediastinum	332	Parkinson's disease	0.622177	1	0
164	Malignant neoplasm of thymus, heart, and mediastinum	333	Other extrapyramidal disease and abnormal movement disorders	0.505733	1	0
164	Malignant neoplasm of thymus, heart, and mediastinum	334	Spinocerebellar disease	1.83202	1	0
164	Malignant neoplasm of thymus, heart, and mediastinum	335	Anterior horn cell disease	1.13707	1	0
164	Malignant neoplasm of thymus, heart, and mediastinum	337	Disorders of the autonomic nervous system	1.08103	1	0
164	Malignant neoplasm of thymus, heart, and mediastinum	340	Multiple sclerosis	0	1	0
164	Malignant neoplasm of thymus, heart, and mediastinum	341	Other demyelinating diseases of central nervous system	4.79104	1	0
164	Malignant neoplasm of thymus, heart, and mediastinum	342	Hemiplegia and hemiparesis	0.812423	1	0
164	Malignant neoplasm of thymus, heart, and mediastinum	345	Epilepsy and recurrent seizures	1.28534	1	0
164	Malignant neoplasm of thymus, heart, and mediastinum	346	Migraine	1.36002	1	0
164	Malignant neoplasm of thymus, heart, and mediastinum	347	Cataplexy and narcolepsy	2.20466	1	0
164	Malignant neoplasm of thymus, heart, and mediastinum	348	Other conditions of brain	1.79948	1.79948	0.587496
164	Malignant neoplasm of thymus, heart, and mediastinum	349	Other and unspecified disorders of the nervous system	0.733774	1	0
164	Malignant neoplasm of thymus, heart, and mediastinum	351	Facial nerve disorders	1.60885	1	0
164	Malignant neoplasm of thymus, heart, and mediastinum	354	Mononeuritis of upper limb and mononeuritis multiplex	1.11314	1	0
164	Malignant neoplasm of thymus, heart, and mediastinum	355	Mononeuritis of lower limb	1.80842	1	0
164	Malignant neoplasm of thymus, heart, and mediastinum	356	Hereditary and idiopathic peripheral neuropathy	1.62688	1	0
164	Malignant neoplasm of thymus, heart, and mediastinum	358	Myoneural disorders	28.8801	28.8801	3.36315
164	Malignant neoplasm of thymus, heart, and mediastinum	359	Muscular dystrophies and other myopathies	3.1148	3.1148	1.13616
164	Malignant neoplasm of thymus, heart, and mediastinum	361	Retinal detachments and defects	0.715116	1	0
164	Malignant neoplasm of thymus, heart, and mediastinum	362	Other retinal disorders	0.851544	1	0
164	Malignant neoplasm of thymus, heart, and mediastinum	363	Chorioretinal inflammations, scars, and other disorders of choroid	1.03625	1	0
164	Malignant neoplasm of thymus, heart, and mediastinum	365	Glaucoma	0.926058	1	0
164	Malignant neoplasm of thymus, heart, and mediastinum	366	Cataract	0.616272	1	0
164	Malignant neoplasm of thymus, heart, and mediastinum	368	Visual disturbances	0.961835	1	0
164	Malignant neoplasm of thymus, heart, and mediastinum	370	Keratitis	1.17798	1	0
164	Malignant neoplasm of thymus, heart, and mediastinum	371	Corneal opacity and other disorders of cornea	0.293529	1	0
164	Malignant neoplasm of thymus, heart, and mediastinum	374	Other disorders of eyelids	1.26621	1	0
164	Malignant neoplasm of thymus, heart, and mediastinum	377	Disorders of optic nerve and visual pathways	1.59825	1	0
164	Malignant neoplasm of thymus, heart, and mediastinum	378	Strabismus and other disorders of binocular eye movements	0.931802	1	0
164	Malignant neoplasm of thymus, heart, and mediastinum	386	Vertiginous syndromes and other disorders of vestibular system	0.646585	1	0
164	Malignant neoplasm of thymus, heart, and mediastinum	389	Hearing loss	0.809186	1	0
164	Malignant neoplasm of thymus, heart, and mediastinum	401	Essential hypertension	0.934391	1	0
164	Malignant neoplasm of thymus, heart, and mediastinum	403	Hypertensive chronic kidney disease	0.68732	1	0
164	Malignant neoplasm of thymus, heart, and mediastinum	405	Secondary hypertension	0	1	0
164	Malignant neoplasm of thymus, heart, and mediastinum	410	Acute myocardial infarction	0.654505	0.654505	-0.423876
164	Malignant neoplasm of thymus, heart, and mediastinum	414	Other forms of chronic ischemic heart disease	0.879703	0.879703	-0.128171
164	Malignant neoplasm of thymus, heart, and mediastinum	416	Chronic pulmonary heart disease	1.36314	1	0
164	Malignant neoplasm of thymus, heart, and mediastinum	425	Cardiomyopathy	0.982529	1	0
164	Malignant neoplasm of thymus, heart, and mediastinum	426	Conduction disorders	0.800247	1	0
164	Malignant neoplasm of thymus, heart, and mediastinum	427	Cardiac dysrhythmias	1.16842	1.16842	0.155653
164	Malignant neoplasm of thymus, heart, and mediastinum	428	Heart failure	1.16497	1.16497	0.152699
164	Malignant neoplasm of thymus, heart, and mediastinum	434	Occlusion of cerebral arteries	0.799996	1	0
164	Malignant neoplasm of thymus, heart, and mediastinum	435	Transient cerebral ischemia	0.643113	0.643113	-0.441435
164	Malignant neoplasm of thymus, heart, and mediastinum	437	Other and ill-defined cerebrovascular disease	0.752419	1	0
164	Malignant neoplasm of thymus, heart, and mediastinum	440	Atherosclerosis	0.638118	0.638118	-0.449232
164	Malignant neoplasm of thymus, heart, and mediastinum	441	Aortic aneurysm and dissection	1.584	1.584	0.459954
164	Malignant neoplasm of thymus, heart, and mediastinum	443	Other peripheral vascular disease	0.716134	1	0
164	Malignant neoplasm of thymus, heart, and mediastinum	446	Polyarteritis nodosa and allied conditions	0.35423	1	0
164	Malignant neoplasm of thymus, heart, and mediastinum	448	Disease of capillaries	0	1	0
164	Malignant neoplasm of thymus, heart, and mediastinum	453	Other venous embolism and thrombosis	2.34215	2.34215	0.85107
164	Malignant neoplasm of thymus, heart, and mediastinum	457	Noninfectious disorders of lymphatic channels	3.06329	3.06329	1.11949
164	Malignant neoplasm of thymus, heart, and mediastinum	477	Allergic rhinitis	2.06521	1	0
164	Malignant neoplasm of thymus, heart, and mediastinum	480	Viral pneumonia	0.29679	1	0
164	Malignant neoplasm of thymus, heart, and mediastinum	482	Other bacterial pneumonia	2.29751	2.29751	0.831824
164	Malignant neoplasm of thymus, heart, and mediastinum	492	Emphysema	2.2321	2.2321	0.802941
164	Malignant neoplasm of thymus, heart, and mediastinum	493	Asthma	1.25411	1	0
164	Malignant neoplasm of thymus, heart, and mediastinum	496	Chronic airway obstruction, not elsewhere classified	2.18092	2.18092	0.779746
164	Malignant neoplasm of thymus, heart, and mediastinum	503	Pneumoconiosis due to other inorganic dust	0	1	0
164	Malignant neoplasm of thymus, heart, and mediastinum	512	Pneumothorax	8.11915	8.11915	2.09423
164	Malignant neoplasm of thymus, heart, and mediastinum	515	Postinflammatory pulmonary fibrosis	1.71363	1.71363	0.538616
164	Malignant neoplasm of thymus, heart, and mediastinum	518	Other diseases of lung	2.88441	2.88441	1.05932
164	Malignant neoplasm of thymus, heart, and mediastinum	520	Disorders of tooth development and eruption	0	1	0
164	Malignant neoplasm of thymus, heart, and mediastinum	523	Gingival and periodontal diseases	3.38649	3.38649	1.21979
164	Malignant neoplasm of thymus, heart, and mediastinum	526	Diseases of the jaws	2.41663	1	0
164	Malignant neoplasm of thymus, heart, and mediastinum	555	Regional enteritis	0.722498	1	0
164	Malignant neoplasm of thymus, heart, and mediastinum	569	Other disorders of intestine	1.04458	1	0
164	Malignant neoplasm of thymus, heart, and mediastinum	571	Chronic liver disease and cirrhosis	0.871453	1	0
164	Malignant neoplasm of thymus, heart, and mediastinum	572	Liver abscess and sequelae of chronic liver disease	0.725829	1	0
164	Malignant neoplasm of thymus, heart, and mediastinum	574	Cholelithiasis	0.66931	0.66931	-0.401508
164	Malignant neoplasm of thymus, heart, and mediastinum	576	Other disorders of biliary tract	0.489645	1	0
164	Malignant neoplasm of thymus, heart, and mediastinum	577	Diseases of pancreas	0.610305	1	0
164	Malignant neoplasm of thymus, heart, and mediastinum	579	Intestinal malabsorption	1.53795	1	0
164	Malignant neoplasm of thymus, heart, and mediastinum	581	Nephrotic syndrome	1.7704	1	0
164	Malignant neoplasm of thymus, heart, and mediastinum	583	Nephritis and nephropathy, not specified as acute or chronic	0.589306	1	0
164	Malignant neoplasm of thymus, heart, and mediastinum	586	Renal failure, unspecified	0.784738	1	0
164	Malignant neoplasm of thymus, heart, and mediastinum	587	Renal sclerosis, unspecified	0	1	0
164	Malignant neoplasm of thymus, heart, and mediastinum	588	Disorders resulting from impaired renal function	0.560325	1	0
164	Malignant neoplasm of thymus, heart, and mediastinum	592	Calculus of kidney and ureter	0.554933	1	0
164	Malignant neoplasm of thymus, heart, and mediastinum	593	Other disorders of kidney and ureter	1.10622	1	0
164	Malignant neoplasm of thymus, heart, and mediastinum	599	Other disorders of urethra and urinary tract	1.00933	1	0
164	Malignant neoplasm of thymus, heart, and mediastinum	606	Infertility, male	0	1	0
164	Malignant neoplasm of thymus, heart, and mediastinum	623	Noninflammatory disorders of vagina	0.99852	1	0
164	Malignant neoplasm of thymus, heart, and mediastinum	628	Infertility, female	0	1	0
164	Malignant neoplasm of thymus, heart, and mediastinum	641	Antepartum hemorrhage, abruptio placentae, and placenta previa	0	1	0
164	Malignant neoplasm of thymus, heart, and mediastinum	642	Hypertension complicating pregnancy, childbirth, and the puerperium	0	1	0
164	Malignant neoplasm of thymus, heart, and mediastinum	648	Other current conditions in the mother classifiable elsewhere, but complicating pregnancy, childbirth, or the puerperium	0	1	0
164	Malignant neoplasm of thymus, heart, and mediastinum	686	Other local infections of skin and subcutaneous tissue	0	1	0
164	Malignant neoplasm of thymus, heart, and mediastinum	690	Erythematosquamous dermatosis	0	1	0
164	Malignant neoplasm of thymus, heart, and mediastinum	692	Contact dermatitis and other eczema	1.12741	1	0
164	Malignant neoplasm of thymus, heart, and mediastinum	695	Erythematous conditions	1.42756	1	0
164	Malignant neoplasm of thymus, heart, and mediastinum	696	Psoriasis and similar disorders	1.00775	1	0
164	Malignant neoplasm of thymus, heart, and mediastinum	701	Other hypertrophic and atrophic conditions of skin	0.439269	1	0
164	Malignant neoplasm of thymus, heart, and mediastinum	702	Other dermatoses	2.57952	2.57952	0.947603
164	Malignant neoplasm of thymus, heart, and mediastinum	703	Diseases of nail	0.963393	1	0
164	Malignant neoplasm of thymus, heart, and mediastinum	704	Diseases of hair and hair follicles	5.49661	5.49661	1.70413
164	Malignant neoplasm of thymus, heart, and mediastinum	706	Diseases of sebaceous glands	2.01649	1	0
164	Malignant neoplasm of thymus, heart, and mediastinum	708	Urticaria	1.70015	1	0
164	Malignant neoplasm of thymus, heart, and mediastinum	709	Other disorders of skin and subcutaneous tissue	2.3283	1	0
164	Malignant neoplasm of thymus, heart, and mediastinum	710	Diffuse diseases of connective tissue	2.80852	2.80852	1.03266
164	Malignant neoplasm of thymus, heart, and mediastinum	714	Rheumatoid arthritis and other inflammatory polyarthropathies	0.577633	1	0
164	Malignant neoplasm of thymus, heart, and mediastinum	715	Osteoarthrosis and allied disorders	0.584728	0.584728	-0.536609
164	Malignant neoplasm of thymus, heart, and mediastinum	716	Other and unspecified arthropathies	0.803219	1	0
164	Malignant neoplasm of thymus, heart, and mediastinum	718	Other derangement of joint	0.125618	1	0
164	Malignant neoplasm of thymus, heart, and mediastinum	720	Ankylosing spondylitis and other inflammatory spondylopathies	1.47194	1	0
164	Malignant neoplasm of thymus, heart, and mediastinum	722	Intervertebral disc disorders	0.787566	1	0
164	Malignant neoplasm of thymus, heart, and mediastinum	723	Other disorders of cervical region	1.37705	1	0
164	Malignant neoplasm of thymus, heart, and mediastinum	724	Other and unspecified disorders of back	0.708519	1	0
164	Malignant neoplasm of thymus, heart, and mediastinum	726	Peripheral enthesopathies and allied syndromes	1.04381	1	0
164	Malignant neoplasm of thymus, heart, and mediastinum	727	Other disorders of synovium, tendon, and bursa	0.350936	1	0
164	Malignant neoplasm of thymus, heart, and mediastinum	728	Disorders of muscle, ligament, and fascia	0.622266	1	0
164	Malignant neoplasm of thymus, heart, and mediastinum	729	Other disorders of soft tissues	0.62772	1	0
164	Malignant neoplasm of thymus, heart, and mediastinum	731	Osteitis deformans and osteopathies associated with other disorders classified elsewhere	1.01458	1	0
164	Malignant neoplasm of thymus, heart, and mediastinum	733	Other disorders of bone and cartilage	1.06424	1	0
164	Malignant neoplasm of thymus, heart, and mediastinum	741	Spina bifida	0	1	0
164	Malignant neoplasm of thymus, heart, and mediastinum	742	Other congenital anomalies of nervous system	0	1	0
164	Malignant neoplasm of thymus, heart, and mediastinum	743	Congenital anomalies of eye	0	1	0
164	Malignant neoplasm of thymus, heart, and mediastinum	744	Congenital anomalies of ear, face, and neck	0	1	0
164	Malignant neoplasm of thymus, heart, and mediastinum	745	Bulbus cordis anomalies and anomalies of cardiac septal closure	2.17513	1	0
164	Malignant neoplasm of thymus, heart, and mediastinum	746	Other congenital anomalies of heart	0.594781	1	0
164	Malignant neoplasm of thymus, heart, and mediastinum	747	Other congenital anomalies of circulatory system	1.35713	1	0
164	Malignant neoplasm of thymus, heart, and mediastinum	749	Cleft palate and cleft lip	16.2391	16.2391	2.78742
164	Malignant neoplasm of thymus, heart, and mediastinum	750	Other congenital anomalies of upper alimentary tract	0	1	0
164	Malignant neoplasm of thymus, heart, and mediastinum	751	Other congenital anomalies of digestive system	0.454877	1	0
164	Malignant neoplasm of thymus, heart, and mediastinum	752	Congenital anomalies of genital organs	0	1	0
164	Malignant neoplasm of thymus, heart, and mediastinum	753	Congenital anomalies of urinary system	1.72124	1	0
164	Malignant neoplasm of thymus, heart, and mediastinum	754	Certain congenital musculoskeletal deformities	0	1	0
164	Malignant neoplasm of thymus, heart, and mediastinum	755	Other congenital anomalies of limbs	0	1	0
164	Malignant neoplasm of thymus, heart, and mediastinum	756	Other congenital musculoskeletal anomalies	0.611672	1	0
164	Malignant neoplasm of thymus, heart, and mediastinum	757	Congenital anomalies of the integument	0	1	0
164	Malignant neoplasm of thymus, heart, and mediastinum	758	Chromosomal anomalies	0	1	0
164	Malignant neoplasm of thymus, heart, and mediastinum	759	Other and unspecified congenital anomalies	1.30683	1	0
164	Malignant neoplasm of thymus, heart, and mediastinum	762	Fetus or newborn affected by complications of placenta, cord, and membranes	0	1	0
164	Malignant neoplasm of thymus, heart, and mediastinum	763	Fetus or newborn affected by other complications of labor and delivery	0	1	0
164	Malignant neoplasm of thymus, heart, and mediastinum	764	Slow fetal growth and fetal malnutrition	514.238	514.238	6.24269
164	Malignant neoplasm of thymus, heart, and mediastinum	774	Other perinatal jaundice	0	1	0
164	Malignant neoplasm of thymus, heart, and mediastinum	780	General symptoms	1.11704	1	0
[truncated: 3,551 more rows]

## Sheet: HPV
HPV disease network candidate diseases (3 digit) and HPV-implicated diseases
[truncated: 1,922 more rows]

[truncated: 1 more sheets: random_HPV]
