# Supplementary material for: Viral Perturbations of Host Networks Reflect Disease Etiology
Source: PLOS journal article supplement (doi:10.1371/journal.pcbi.1002531), 2012-06-28
Supplement: S5 (10.1371/journal.pcbi.1002531.s005) [file journal.pcbi.1002531.s005]

**Viral perturbations of host networks  
reflect disease etiology**

**Supplementary Information**

**Table of Contents**

|                                                                                                |           |
|------------------------------------------------------------------------------------------------|-----------|
| <b>Datasets .....</b>                                                                          | <b>1</b>  |
| <b>1) Virus-host PPI screens.....</b>                                                          | <b>1</b>  |
| <b>1a. EBV-human PPIs.....</b>                                                                 | <b>2</b>  |
| <b>1b. HPV16-human PPIs. ....</b>                                                              | <b>2</b>  |
| <b>2) Host Interactome.....</b>                                                                | <b>3</b>  |
| <b>a) Protein-protein interactions (PPIs).....</b>                                             | <b>3</b>  |
| <b>b) Protein-DNA interactions (PDIs). ....</b>                                                | <b>3</b>  |
| <b>c) Metabolic enzyme-coupled interactions (MCIs).....</b>                                    | <b>4</b>  |
| <b>3) Gene-disease associations. ....</b>                                                      | <b>5</b>  |
| <b>All simple paths between viral targets and disease associated genes .....</b>               | <b>6</b>  |
| <b>Systematic determination of best network configuration .....</b>                            | <b>6</b>  |
| <b>Expression analysis .....</b>                                                               | <b>8</b>  |
| <b>Overlooked virally implicated diseases.....</b>                                             | <b>10</b> |
| <b>Random disease networks .....</b>                                                           | <b>11</b> |
| <b>Clinical data and relative risk analysis .....</b>                                          | <b>12</b> |
| <b>a. HPV patients.....</b>                                                                    | <b>13</b> |
| <b>b. EBV patients. ....</b>                                                                   | <b>14</b> |
| <b>c. Average relative risk between candidate diseases and virally implicated diseases....</b> | <b>14</b> |
| <b>Prioritizing candidate diseases for viral implication .....</b>                             | <b>15</b> |
| <b>Tissue specificity .....</b>                                                                | <b>20</b> |
| <b>EBV presence in disease tissues.....</b>                                                    | <b>21</b> |
| <b>Topological properties of viral targets and viral disease networks .....</b>                | <b>22</b> |
| <b>Giant component size of the disease network.....</b>                                        | <b>22</b> |
| <b>Disease gene properties. ....</b>                                                           | <b>22</b> |
| <b>List of supplementary files .....</b>                                                       | <b>23</b> |
| <b>Supplementary figures and tables .....</b>                                                  | <b>24</b> |

## Datasets

---

To systematically analyze the viral perturbations of host networks, we collected three categories of biological connections: 1) virus-host interactions; 2) host-host interactions; and 3) human gene-disease associations.

**1) Virus-host PPI screens.** Experimentally-derived PPI data for EBV-Human and HPV16-Human interactions is from Rozenblatt-Rosen et al (*Nature*, in press) and obtained as follows. Yeast two-hybrid screens (Y2H) between EBV and HPV16 viral proteins and ~12,200 human proteins encoded by a library of full length human open reading frame (ORFs) clones in Human ORFeome v3.1 collection [1,2], encompassing ~10,200 human genes, were carried out as before [3,4]. The EBV-human library Y2H screen tested 86 out of 89 EBV proteins as fusions to the DNA binding domain of Gal4 (Gal4-DB) against ORFeome v3.1 proteins fused to the activation domain of Gal4 (Gal4-AD), while the HPV-human library Y2H screen testing HPV16 proteins E4, E5, E6 and E7 was carried out matrix-style in reciprocal fashion with HPV proteins as both Gal4-DB and Gal4-Ad fusions against the corresponding human Gal4-AD and Gal4-DB fusions, respectively. The primary EBV and HPV Y2H screens against our human library of ~12,200 proteins were each performed twice, and any Y2H positives that passed secondary phenotyping and autoactivator controls in either screen [3,4] were then retested by mating fresh glycerol stocks of the relevant haploid yeast cells of opposite mating-type containing virus or human DB-X or AD-Y expression plasmids to confirm reproducible Y2H phenotypes. Retesting of all EBV-human positive pairs was carried out twice and an EBV-human pair was considered confirmed if

both retests were positive with no latent autoactivators appearing in any retest. HPV-human retesting was performed four times in both orientations (DB-HPV vs AD-Hu and DB-Hu vs AD-HPV) and an HPV-human pair was considered confirmed if at least three retests out of four for either orientation were positive with no latent autoactivators appearing in any of the four orientation-specific retests.

**1a. EBV-human PPIs.** The EBV-host interaction dataset used herein is compiled from previously published EBV-human protein-protein yeast two-hybrid interaction data [5], newly generated yeast two-hybrid data (Rozenblatt-Rosen, et al), literature-curated interactions from the VirusMINT database [6], and an additional set of interactions we curated from the primary literature (Supplementary Table S1). In total the compiled dataset contains 460 PPIs among 49 viral and 336 human proteins. The EBV *comprehensive dataset* is provided in Supplementary Table S8. To mitigate inspection bias all of the analyses we report were also repeated with high-throughput datasets only, excluding interactions coming from literature-curated and small-scale datasets. The high-throughput EBV-human PPIs include previous Y2H data [5] and the Y2H dataset from Rozenblatt-Rosen, et al, , which combined have 287 interactions among 49 viral and 177 human proteins.

**1b. HPV16-human PPIs.** The HPV16-host interactions combines newly generated Y2H virus-human protein-protein interaction data from Rozenblatt-Rosen, et al, published tandem affinity purification (TAP) co-complex membership data [7], and literature-curated virus-human protein-protein interactions reported in VirusMINT [6] which we re-curated to minimize

curation errors (Supplementary Table S2). The HPV16 comprehensive dataset includes 205 interactions among 8 viral proteins and 189 human proteins where most of the interactions involve three HPV16 proteins, E7 (147 interactions) and E6 (31 interactions) and E2 (19 interactions) (Supplementary Table S9). For the high-throughput dataset, we used the Y2H and the tandem affinity purification co-complex membership datasets and excluded the curated interactions. This high-throughput dataset includes 124 interactions among two viral proteins (E6 and E7) and 123 human proteins.

**2) Host Interactome.** The host interactome includes human protein-protein interactions (PPIs), protein-DNA interactions (PDIs), and metabolic enzyme-coupled interactions (MCIs) (Supplementary File S1).

*a) Protein-protein interactions (PPIs).* For human PPIs, we collected binary interactions reported in IntAct [8] and MINT [9] databases, combining these with three Y2H-based high-throughput datasets [3,8,9,10,11]. For the high-throughput dataset, we removed literature-curated PPIs and only used the three Y2H-based datasets. Host PPIs were used in the  $P^2$ ,  $P^2T$  and  $P^2TM$  configurations (see *Systematic determination of best network configuration*).

*b) Protein-DNA interactions (PDIs).* For protein-DNA interactions, we used version 2008.2 of TRANSFAC database [12] for both viruses. For EBV, we also included the literature-curated set of B cell interactome [13] given that EBV is mainly present in B cells. The TRANSFAC database contains mostly literature-curated, plus some predicted PDI data based on the experimentally-

proven binding sites of transcription factors and the regulated genes [12]. TRANSFAC 2008.2 contains 271 human transcription factors and 564 regulated genes. Quality control information of TRANSFAC is available at <http://www.gene-regulation.com/info/qm.html>. Within TRANSFAC and B cell interactome datasets, there are 19 transcription factors targeted by EBV, and another 122 genes are regulated by these virus-targeted transcription factors, for a total of 138 PDIs. For HPV16 there are 17 transcription factors targeted by the virus and 129 genes regulated by these virus-targeted transcription factors, for a total of 176 PDIs. Host PDIs were used in the PT, PTM, P<sup>2</sup>T, P<sup>2</sup>TM configurations (see *Systematic determination of best network configuration*).

*c) Metabolic enzyme-coupled interactions (MCIs).* Metabolic enzyme-coupled interactions were defined by metabolic coupling analysis [14] which measures substrate sharing through adjacent reactions and flux coupling.

*Substrate sharing through adjacent reactions:* If the same substrate is shared between two metabolic reactions, the scarcity or abundance of that substrate may affect the fluxes of both reactions, potentially coupling their activity. Following precedent [14], we considered two metabolic reactions and hence their catalyzing enzyme to be linked if they process a common metabolite, *i.e.* if they are adjacent to each other in a metabolic reaction map. A threshold is introduced where only the metabolites that are involved in no more than four reactions are considered. We used the KEGG [15] and BIGG [16] databases as sources for metabolic reactions, with a total of 1,729 enzymes.

*Flux coupling:* By using the flux coupling finder methodology (FCA) [17], we identified two types of coupling between pairs of reactions  $i$  and  $j$ : (i) directional coupling ( $i \rightarrow j$ ), if a nonzero flux for  $i$  implies a nonzero flux for  $j$  but not necessarily the reverse; or (ii) full coupling ( $i \leftrightarrow j$ ), if a nonzero flux for  $i$  implies not only a nonzero but also a fixed flux for  $j$  and vice versa. Details of the flux coupling analysis were previously discussed [14]. We applied FCA to the human metabolic network construction, *Homo sapiens* Recon 1, to obtain flux coupling information [18].

A metabolic coupling interaction exists between two enzymes if they share adjacent reactions in the KEGG database or in the BIGG database, or if they are flux-coupled via FCA. Of the 336 human proteins with which EBV viral proteins interact, 21 proteins are metabolic enzymes. An additional 303 enzymes were coupled to these virus-targeted enzymes by metabolic coupling. For HPV, of the 189 targeted human proteins, 16 are metabolic enzymes. An additional 354 enzymes were found to be coupled to these virus-targeted enzymes by metabolic coupling analysis. The defined MCIs were used in the PTM, P<sup>2</sup>M and P<sup>2</sup>TM configurations (Section *Systematic determination of best network configuration*). The full list of interactions is provided (Supplementary File S1).

**3) Gene-disease associations.** We gathered information on human genes associated with diseases from the Online Inheritance in Man (OMIM) database, a comprehensive compendium of human genes and genetic phenotypes [19]. Specifically we used the OMIM Morbid Map repository (Feb 18, 2009), which lists genes and diseases in a machine parse-able format,

and also presents the cytogenetic map location of disease genes. To map the OMIM disease names to International Statistical Classification of Diseases and Related Health Problems version 9 (ICD-9) codes, we used the manually curated list of human inherited diseases [20] as a baseline and updated it as necessary. The gene-disease associations list is provided (Supplementary File S2).

### **All simple paths between viral targets and disease associated genes**

---

In the main text we mentioned that the number of potential pathways linking viral targets to genes (or gene products) associated with virally implicated diseases is greater than  $10^{200}$ . In essence the problem is to count the number of all simple paths<sup>1</sup> between a pair of nodes on a connected graph. In graph theory this well-discussed problem was shown to be NP-complete in 1979 [21]. Using a recently published Monte Carlo approach [22], we estimated the total number of non-shortest paths to be greater than  $10^{200}$  ( $P = 0.001$ ), which is practically infinity for our investigation.

### **Systematic determination of best network configuration**

---

Given the small-world property of current interactome models [23,24], most of the host interactome would be covered in the 3- or 4-hop neighborhood of viral targets. Hence, thresholds need to be applied to avoid reaching too many irrelevant proteins, a concept

---

<sup>1</sup> **Simple path:** A path with no repeated vertices.

commonly called *network pruning* in graph theory [25]. We define such a threshold as a *network configuration*, which restricts the maximum number of hops allowed for each type of interactions (PPI, PDI and MCI) (Supplementary Figure S1). The simplest configuration “P” includes only viral targets, while the “PT” configuration includes viral targets and host genes regulated by them via PDI, and the “PM” configuration includes viral targets and host enzymes coupled to them via MCI. The more extended configurations, PTM, P<sup>2</sup>T, P<sup>2</sup>M, P<sup>2</sup>TM, capture increasing maximum number of hops along the links of the PPI, PDI and MCI networks, reaching systematically deeper into the interactome, and involving an increasing number of proteins.

We determined the optimal configuration by calculating the p-values and odds ratios for the enrichment of virally implicated diseases associated with host genes in the neighborhood, with optimal configuration defined by Fisher’s exact test. The sets of virally implicated diseases (13 for EBV and 9 for HPV16) and number of diseases (696) in OMIM-ICD9 space (Supplementary File S2) were used in the calculation. Supplementary Tables S3 and S4 show the p-values and odds ratios with and without the literature-curated virus-host interactions and host PPIs for each configuration.

|                                 | Virally implicated | Not virally implicated |
|---------------------------------|--------------------|------------------------|
| Mapped in the configuration     | 9                  | 119                    |
| Not mapped in the configuration | 4                  | (696-119-9-4) = 564    |



Fisher's exact contingency table of the PT configuration for EBV using the comprehensive dataset. "Mapped" refers to diseases being associated with genes in the neighborhood defined by the PT configuration.

The optimal network configuration depended on the nature of the virus-host interaction datasets. For both EBV and HPV16 the "PT" configuration was the optimal configuration with the lowest p-value and highest odds ratio, with high-throughput and literature curated virus-host interactions combined (Supplementary Figure S4). When we limited the datasets to high-throughput datasets only (hence excluding literature-curated interactions), P<sup>2</sup> (EBV) and PM (HPV16) were the optimal configurations (Supplementary Figure S4).

## Expression analysis

---

After normalizing and log-transforming raw expression data by the RMA algorithm [26], expression changes were calculated as the ratio of expression levels between virus-infected tissues and normal tissues. To identify differentially expressed genes the steps were: (1) obtain log-transformed gene expression levels with and without viral infection,  $L_w$  and  $L_{w0}$  respectively, (2) calculate the expression-fold changes by using the ratio  $R=2^{(L_w-L_{w0})}$ , (3) find the genes with significant R on the microarray ( $\alpha=0.05$ , two-tails), (4) determine how many of the genes that show significant expression change are hit by the virus (regulated by virus-targeted transcription factors) or hit by the transcription factors among randomly sampled genes, (5)

calculate the empirical p-value of the observed (virus-targeted) number of “differentially expressed genes” against random sampling. Randomized sampling was done 10,000 times within a pool of genes that are regulated by at least one transcription factor in the TRANSFAC database and that have non-zero expression on the microarray in normal tissues (above lowest 5% expression level). Within TRANSFAC and B cell interactome datasets, which form the transcriptome space for this study, there are 564 and 1299 genes regulated by transcription factors. The transcription factors targeted by EBV regulate 122 genes. Similarly for HPV16 129 genes are regulated by HPV16-targeted transcription factors. Hence we chose 122 and 129 genes from the transcriptome space to construct our random control.

The GEO datasets [27] used in the expression analysis are: GSE15156 (Cervical carcinoma), GSE3292 (Head and neck squamous carcinoma); GSE2350 (Burkitt’s lymphoma and B cell lymphoma). Of the 861 genes differentially expressed in Burkitt’s lymphoma tissues, the 25 that were shared with the EBV disease network was significantly higher than the expected 10.9 shared genes in a randomized control ( $P = 8.3 \times 10^{-5}$ ) (Supplementary Figs. S5, S6, and Supplementary Table S5). For B cell lymphoma tissues, the determined value of 21 differentially expressed genes in the EBV disease network was highly significant ( $P = 0.00367$ ). For HPV16, we analyzed cervical carcinoma and head and neck squamous carcinoma tissues. In the cervical carcinoma tissues, 1229 genes were differentially expressed, of which 12.3 were expected to be differentially expressed in random control. Hence, the 26 genes shared in the HPV16 viral disease network were highly significant ( $P = 0.00023$ ). Of the 1721 genes differentially expressed in head and neck squamous carcinoma tissues, the value of 24 genes in HPV16 viral

disease network was again significantly more than 12.7 shared genes in random control ( $P = 0.0026$ ). The genes that show significant expression change in Burkitt's lymphoma, B cell lymphoma, cervical cancer, and head and neck squamous cell carcinoma are listed (Supplementary Table S10).

We also tested two different cutoffs for determining the differentially expressed genes by using the top/bottom 2% and 10% scoring genes ( $\alpha=0.02$  and  $0.10$ , two-tails). For the 2% cutoff, we observed 12 ( $P = 0.0015$ ), 11 ( $P = 0.0046$ ), 12 ( $P = 0.0039$ ), and 13 ( $P = 0.0018$ ) genes regulated by viral targets to be differentially expressed in Burkitt's lymphoma, B cell lymphoma, cervical carcinoma and head and neck squamous carcinoma tissues, respectively (Supplementary Table S5). For the 10% cutoff, we observed 36 ( $P = 0.00176$ ), 40 ( $P = 6.77 \times 10^{-5}$ ), 41 ( $P = 0.0006$ ), and 31 ( $P = 0.224$ ) genes regulated by viral targets to be differentially expressed in Burkitt's lymphoma, B cell lymphoma, cervical carcinoma and head and neck squamous carcinoma tissues, respectively (Supplementary Table S5). The results remained significant except for head and neck squamous carcinoma tissues with the 10% cutoff.

### **Overlooked virally implicated diseases**

---

We were unable to link two and four of the HPV- and EBV-implicated diseases respectively (Table 1a, b). Since our method is based on the concept that cellular genes targeted by viruses causes their inactivation (or activation) similar to a genetic mutation that would be catalogued in OMIM [19], we will miss those diseases that are universally caused by viruses. Infectious mononucleosis, for example, a disease clearly linked to EBV infection, lacks any known susceptibility genes and is not detected (Table 1a). Over 99% of all cervical carcinoma are

caused by HPV infections and hence the cellular genes targeted by HPV oncoproteins will not be mutated and hence are not listed in OMIM. This has been impressively validated for the p53 and retinoblastoma tumor suppressors [28,29], the major cellular targets of the HPV16 E6 and E7 oncoproteins, respectively, which were found mutated in HPV negative cervical cancers but were not mutated in the HPV positive cervical cancer lines [30]. The two putative susceptibility genes for cervical carcinoma listed in OMIM for cervical cancer (FGFR3 and ST-3), would presumably occur in HPV positive tumors and hence contribute to the carcinogenic process independent of viral infection and, hence, will not be detected by our method. Adding the p53-cervical cancer link to the Morbid Map would increase the number of HPV-related virally implicated diseases to 8 out of 9. The number of virally implicated diseases in the neighborhood of HPV targets was significantly higher than randomly expected when p53-cervical cancer association was included in the OMIM Morbid Map ( $P = 5 \times 10^{-5}$ ; Supplementary Figure S7).

Another likely reason to be unable to link some diseases is because of the incompleteness inherent to human interactome data [11] and in OMIM. As future information is assimilated, connections to these diseases may eventually appear. One noteworthy disease missing from the HPV16 viral disease network is carcinoma of cervix uteri.

### **Random disease networks**

---

EBV and HPV16 disease networks are highly connected, where the size of the giant component (largest connected component) is on the order of the number of nodes in the network. To test

if the observed viral disease network could emerge by chance we generated random viral targets and measured the size of the giant component in the neighborhood of these random targets. The giant components in random disease networks are on average much smaller ( $P = 0.0175$  for EBV;  $P = 0.00936$  for HPV) compared to the real disease network (size = 253 for EBV and size=220 for HPV) (Supplementary Figure S8A,B), indicating that the observed viral disease network is unlikely to emerge by chance, and instead reflects the functional adaptation of the virus to the host interactome.

### **Clinical data and relative risk analysis**

---

Relative risk (RR) is the ratio between the observed co-occurrence and probabilistically-inferred (assuming independence) co-occurrence of two diseases given by:

$$RR = C_{12} / C_{12}^*,$$

where  $C_{12}^*$  is the expected number of patients to have disease 1 and 2, and  $C_{12}$  is the observed number of patients that have disease 1 and 2. If diseases occurred independently, the number of patients affected by both diseases would be given by:

$$C_{12}^* = (P_1 \times P_2) / N,$$

where  $P_1$  is the number of patients who had disease 1,  $P_2$  is the number of patients who had disease 2, and  $N$  is the total number of patients.

The relative risks of diseases are calculated using U.S. Medicare patient medical history data [14,31]. The MedPAR records include 13,039,018 patients who were 65 years or older, and the

dates and reasons for all their hospitalizations during 1990-1993, reported in ICD-9-CM format. Each record consists of the date of visit, a primary diagnosis and up to nine secondary diagnoses, all specified by ICD-9 codes of up to five digits. The first three digits specify the main disease category, while the last two provide additional information about the disease. The ICD-9-CM classification consists of 657 different categories at the 3-digit level and 16,459 categories at 5 digits [32].

To calculate the relative risk within the 99% confidence intervals, we calculated the lower and upper bounds of confidence interval according to the Katz *et al.* method [33].

$$LB = RR \times \exp (-2.576 \times \sigma_{12})$$

$$UB = RR \times \exp (2.576 \times \sigma_{12})$$

where  $\sigma_{12}$  is given by

$$\sigma_{12} = \sqrt{1 / C_{12} + 1 / (P_1 \times P_2) - 1 / N - 1 / (N \times N)}.$$

The relative risk is taken to be significant within the 99% confidence interval if the lowerbound value is larger than 1 when RR is larger than 1, and if the upperbound is smaller than 1 when RR is smaller than 1. Otherwise we consider the relative risk to be 1, that is, random.

**a. HPV patients.** Four ICD-9 codes describe HPV-related diseases in the ICD-9 database: viral warts due to human papillomavirus (078.1), human papillomavirus (079.4), malignant neoplasm of cervix uteri (180.0), and abnormal Papanicolaou smear of cervix and cervical HPV (795.0). A total of 13,796 female and 1,242 male patients in the Medicare database had been diagnosed with these HPV-related diseases. ICD-9 code 180 was not relevant to male patients. Raw data

for calculating relative risks of candidate diseases among HPV patients is available in Supplementary Tables S11, S12.

**b. EBV patients.** The only ICD-9 code in the Medicare database specific to Epstein-Barr virus is 075 for infectious mononucleosis. Mononucleosis is an early adulthood disease and is rare in the elderly population, plus there is some evidence that mononucleosis may not be caused by EBV in elderly patients [34]. As EBV is a latent virus carried by 90% of the population, gaining the same insights as for HPV would require access to the disease history of a younger population. We could still identify the set of patients that had been diagnosed either with B cell lymphoma (ICD-9 code: 200) or nasopharyngeal carcinoma (ICD-9 code: 147), diseases well-accepted as associated with EBV. We call these 24,974 patients as “EBV patients” though the determination is through the associated diseases rather than a viral diagnosis directly. Raw data for calculating relative risks of candidate diseases among EBV patients is available in Supplementary Table S13.

**c. Average relative risk between candidate diseases and virally implicated diseases.** The average relative risk between 141 HPV candidate diseases and 14 HPV-implicated diseases (Table 1b) was  $\langle RR \rangle = 1.985 \pm 0.101$ , significantly higher than the observed relative risk between random OMIM diseases and the 14 HPV-implicated diseases,  $\langle RR \rangle = 1.77 \pm 0.06$  (Mann-Whitney u-test,  $P = 0.035$ ). For EBV the average relative risk between the 128 candidate diseases and the 17 EBV-implicated diseases (Table 1a) is  $\langle RR \rangle = 2.802 \pm 0.155$ , versus  $\langle RR \rangle = 2.391 \pm 0.17$  for the random control (Mann-Whitney u-test,  $P < 3.96 \times 10^{-5}$ ). These differences suggest that many

diseases in the viral disease network are not only linked by plausible molecular paths to the viral targets, but also show a clinical association to the virally implicated diseases.

Calculating the averages with the logarithm of relative risk did not change the results. For HPV,  $\langle \log RR \rangle = 0.172 \pm 0.018$ , was significantly higher than the observed relative risk between random OMIM diseases and the virally implicated diseases,  $\langle \log RR \rangle = 0.125 \pm 0.02$  (unpaired t-test,  $P = 0.0186$ ). For EBV the average relative risk between the candidate diseases and the virally implicated diseases (Table 1a) was  $\langle \log RR \rangle = 0.451 \pm 0.02$ , whereas the random control yielded  $\langle \log RR \rangle = 0.317 \pm 0.02$  (unpaired t-test,  $P < 0.0001$ ). We provide the lists of pairs of diseases with their corresponding relative risks (Supplementary File S3).

### **Prioritizing candidate diseases for viral implication**

---

Disease gene prediction algorithms have been developed motivated by the observation that genes causing the same or similar diseases tend to lie close to one another in a network of protein-protein or functional interactions [35]. A promising algorithm is based on diffusion on the interactome [36]. We adapted their algorithm to prioritize the diseases in the viral disease network. This diffusion-based flow algorithm assigns a prioritization score to each node in the host interactome,

$$F(v) = \alpha \left[ \sum_{u \in N(v)} F(u) w'(v, u) \right] + (1 - \alpha) Y(v)$$



where  $w'$  is a normalized weight function representing the reliability of each edge in the network,

$$W'_{ij} = W_{ij} / \sqrt{D(i,i)D(j,j)}.$$

The weight normalization takes into account the probability of observing a random edge between two proteins. That is, the weight of an edge is normalized by the degrees of its endpoint, which is the probability of observing an edge between two nodes in a random network with the same node degrees.  $Y(v)$  stores the prior information known about node  $v$ ;  $\alpha$ , the only parameter in the algorithm, determines the relative importance of these constraints with respect to one another. For our data, the viral targets had their prior score set to 1, and  $W_{ij}$  for all edges equals 1.

The algorithm prioritizes genes in the host interactome. By turning to gene-disease associations we could prioritize the candidate diseases. If a disease has multiple known genes, as is often true, then each disease is assigned the highest score among the scores of its associated genes. To measure the precision-recall performance of the prioritization, we set the positive reference set to be the virally implicated diseases (Table 1). For a given cutoff score, precision was the number of true positives divided by all positives and recall was the number of true positives divided by all true positives. Setting  $\alpha=0.7$ , or 0.8 or 0.9 all yielded similar results (Supplementary Figure S9A,B). We also calculated the relative risk of diseases above a certain cutoff score using the HPV and EBV patient data. We show results for when we included and excluded the positive reference set of virally implicated diseases from the averaging. Setting  $\alpha=0.7$  for EBV and  $\alpha=0.8$  for HPV yielded the best results (Supplementary Figure S9C,D). Lists of

diseases sorted according to the prediction score are given (Supplementary File S4). When we alternatively use the logarithm of relative risk, higher-ranked diseases in the prioritization are again more often associated with viral patients (Supplementary Figure S9E).

We measured the correlation between the relative risk of a disease and the rank of its associated gene (based on the average score obtained by the flow algorithm) using Pearson correlation coefficient (PCC) in Supplementary File S4. For EBV, PCC = 0.45 over the entire set of diseases (a total of 487 diseases). The top 100 diseases have a slightly higher correlation value of PCC=0.5. For HPV, the entire set appears not be correlated due to some outlying diseases with high relative risk with low scores. The top 100 diseases had a reasonable correlation value of PCC=0.30 and the top 25 have a PCC of 0.41. For both viruses, there are quite a few diseases whose genes are ranked low, but they have high relative risk. We believe this trend is likely due to genes that are rather disconnected from the interactome, but potentially may be associated with HPV. As interactome gets more complete, these effects may become less pronounced.

We also measured the precision-recall performance with random viral targets for control purposes (Supplementary Figure S10A,B). The curve we obtained is flat indicative of the poor performance of random targets in ranking virally implicated diseases highly. The relative risk of diseases above a certain cutoff score (Supplementary Figure S10C,D) is also flat with  $RR \sim 1$ , again indicating the poor performance of random targets in identifying diseases relevant to EBV and HPV patients.

## Criteria to select potential virally implicated diseases

---

To assess if the diseases we identified might be virally implicated, we established three lines of evidence: (i) the disease has significant comorbidity with viral-associated diseases; (ii) the disease-associated genes in the disease network are differentially expressed in viral protein-induced cell populations; (iii) the disease-associated genes are differentially expressed in appropriate diseased tissues.

To obtain the disease associated genes that are differentially expressed in viral protein induced cell populations (criterion ii), HPV16 E6 and E7 oncogenes were independently transduced into primary human fibroblast (IMR90) (data from Rozenblatt-Rosen, et al) and keratinocyte (Ker) cell populations (this work). Affymetrix Human Gene1.0 ST and Human Genome U133 Plus 2.0 arrays, respectively, were used to measure gene expression profiles for five or more replicate samples in each of the cell types. Array data were normalized by RMA, batch effects were removed using ComBat, and the limma package in R/Bioconductor was used to identify differential expression. We find that of the 104 human genes that are regulated by 15 human protein targets of E6 and E7, 22 disease-associated genes were differentially expressed in the IMR90 (reproduced from Rozenblatt-Rosen, et al and provided herein for clarity in Supplementary Table S14) and keratinocyte cell lines (Supplementary Table S14). Of these 22 genes, 15 of them (*CDK4*, *CHEK1*, *CYC1*, *DDB2*, *DUSP1*, *FOSL1*, *IFITM1*, *ISG15*, *IVL*, *KRT16*, *MMP1*, *MMP2*, *NDRG1*, *ODC1*, *WEE1*) overlap with the genes differentially expressed in cervical carcinoma tissues (Supplementary Table S10c). There are 2,888 differentially expressed genes in the presence of E6 or E7 in IMR90 and keratinocyte cell lines out of 21,500 genes on the

microarray. The significance of finding 22 out 104 indirect viral targets differentially expressed in the presence of E6 or E7 is 0.0083 calculated by the hypergeometric distribution.

These 22 genes, differentially expressed in E6 or E7 induced IMR90 and/or HFK cell populations, have been linked to 39 diseases in OMIM, among which only six belong to known HPV-related diseases (Table 1B). We therefore asked if any of the remaining 33 diseases might be virally implicated (Figure 3F). 7 diseases out of 39 have high relative risk among HPV patients (four of which are previously unknown). To calculate the significance of having 7 out 39 to have high relative risk among HPV patients, we first calculated the number of diseases in the OMIM disease space that has significant prevalence among HPV patients. There are 626 OMIM diseases that have known genes associated with them as previously provided in Supplementary File S2. Of the 626 diseases, 38 of them have significant relative risk among HPV patients (Supplementary Table 17). Hence the significance of having 7 diseases among 39 calculated by hypergeometric distribution (MS Excel; =HYPGEOMDIST(7,39,38,626)) is 0.0049.

Of the four diseases that satisfy criteria (i) and (ii) above, for the three of them we could not validate criterion (iii), either due to lack of expression data on disease tissues (neoplasm of peritoneum), or lack of differential expression of the disease gene in the corresponding diseased tissue (benign neoplasm of skin) or the expression pattern induced by E6/E7 expression was the opposite from the one seen in the disease (diseases of sebaceous glands). The fourth disease on the list, Fanconi anemia, satisfied all three criteria. Previous studies have shown that HPV16 E7 induces expression of the FANCD2 gene through an E2F dependent

pathway. As this regulatory link from E2F1 to FANCD2 is absent in the literature-curated protein-DNA interaction list we used, this path did not emerge in our initial analysis. Once we make the E2F1→FANCD2 link explicit, we can confirm this path, as E7 interacts with E2F1 (Figure 3F) and in HPV16 E7 expressing IMR90 cells FANCD2 is differentially expressed along with other members of the nuclear multiprotein core complex (FANCA, FANCE, FANCG, FANCI, and FANCM) necessary for the monoubiquitination of FANCD2 [37].

### **Tissue specificity**

---

To make our predictions more specific to the tissue types the viruses infect, we used tissue specific expression data from <http://biogps.org> to narrow down the number of genes and their associated diseases from the disease network. That is, if a gene in the neighborhood of the viral targets is not expressed in the tissue of interest, this gene is removed from the neighborhood. A number of considerations had to be made here about which tissue to choose and what cutoff to introduce as we decide whether a gene is expressed in that particular tissue. We used the criterion similar to the one used previously [38] by Su et al, where an average difference (AD) value of 200 was defined as a conservative threshold to call a gene “expressed” or present. Of the available tissues, we chose testis and ovary tissues for HPV and Burkitt’s lymphoma (Raji cells) and B lymphoblast tissues for EBV. With the tissue specificity consideration, the number of associated diseases for EBV went down from 128 to 89, and for HPV from 141 to 105, without losing any of the virally-implicated diseases (Supplementary Tables S15, S16). One can

include protein expression or better tissue expression data as it becomes available to make the predictions specific to the cell tropism of the virus as described here.

### **EBV presence in disease tissues**

---

Despite a very strong correlation between EBV and Burkitt's lymphoma (BL), the contribution that EBV proteins make to BL remains to be fully elucidated. There has been some evidence for the detection of EBNA2 by immunohistology in endemic BL tumor cells [39]. Another paper looked at an unusually heterogenous BL sample [40] and reported finding cells in three different types of EBV latency, one of which expressed EBNA2 (but not LMP1). The EBNA2 positive cells were more resistant to apoptosis than cells in latency I "classical BL". Given this sparse evidence, EBNA2 may not make a significant contribution to ongoing BL. It is more likely that EBNA2 targeting of *MYC* may be an important precursor to BL. EBV most likely provides an anti-apoptotic rather than growth transforming effect.

When we refer to B-cell lymphoma, we do not consider post-transplant lymphoproliferative disease due to the fact that this disease occurs mainly due to immune deficiency hence we have no known genes associated with it. Mutations on *BCL2* and *BCL3* gene have been associated with many types of lymphomas, such as Hodgkin's lymphoma and follicular lymphoma [41,42]. EBV is present in many lymphoma tissues including Hodgkin's and non-Hodgkin lymphomas [43]. EBNA2 targeting RBPJ (which regulates *BCL3*) is fairly well understood and is a likely precursor to B-cell lymphoma [44].

There is some evidence of EBV being present in HCC cells [45,46], but the reproducibility of these findings has been questioned. Similarly lymphoepithelioma-like carcinoma, a form of lung cancer is strongly associated with EBV infection in Asian patients, but there is controversy over whether an association exists in patients from Western countries [47,48]. Our method aims to highlight potential molecular relationships between EBV and these diseases, but not necessarily directly causal relationships.

### **Topological properties of viral targets and viral disease networks**

---

Viral proteins of HIV and EBV tend to target hub proteins [5,49]. This tendency held true for EBV and HPV16 datasets when either literature-curated interactions were included or omitted (Supplementary Figure S11).

**Giant component size of the disease network.** In addition to measuring the size of the giant component in the viral disease networks in Figure 3 B,D for random viral targets, we measured the size with randomized viral targets with degree-control. As shown in Supp Fig 8c and d, when the degree of the viral targets is preserved, the mean size of the largest connected component in viral disease network is larger than the non-controlled case. Meanwhile the true size of the EBV and HPV is significantly larger than the degree-controlled case (EBV  $P = 0.00156$ ; HPV  $P < 0.0001$ ).

**Disease gene properties.** In the main text, we calculated the shortest path lengths, defined as the minimum number of “hops” along the links of the host interactome from viral targets to

genes associated with a given virally implicated disease (Figure 1B). For either EBV or HPV the average shortest path (averaged over the number of virally implicated diseases) is significantly shorter than when virally implicated diseases were replaced with randomly sampled human diseases in OMIM. To test whether this result could be due to the properties of the genes associated with virally implicated diseases, we randomized the gene-disease associations by preserving their degree in the interactome. While this randomization will preserve the degree of disease genes, it will alter the gene that associated with virally implicated disease, hence altering the property of the original virally-implicated disease gene. This in turn would make the shortest path from viral targets to virally associated diseases much longer. For EBV, the distribution of random shortest paths shifted towards slightly longer shortest paths indicating that the genes associated with EBV-implicated diseases do have some central role (mean shortest path increased from 1.7 to 2.2; Supplementary Figure S12A). For HPV, the distribution of shortest paths remained the same as Figure 1D (mean shortest path remained 2.0; Supplementary Figure S12B).

### List of supplementary files

---

**Supplementary File S1.** Full list of interactions and gene-disease associations in viral disease networks, including the sources of data. **(Sheet 1)** EBV disease network, **(Sheet 2)** HPV16 disease network. VH-PPI: virus-host protein-protein interaction, PPI: host protein-protein interaction, PDI: host protein-DNA interaction, MCI: metabolic enzyme-coupled interactions calculated using KEGG, or BIGG databases, or flux coupling analysis.



**Supplementary File S2.** OMIM genes and diseases and their corresponding ICD-9 codes.

**Supplementary File S3.** Relative risk analysis. **(Sheet 1, 3)** relative risk between EBV- and HPV-implicated diseases and candidate diseases in the disease network. **(Sheet 2, 4)** relative risk between EBV- and HPV-implicated diseases and all mappable diseases which constitute the random control.

**Supplementary File S4.** Full list of diseases prioritized by the flow algorithm for **(Sheet 1)** EBV **(Sheet 2)** HPV. Diseases are sorted according to maximum scores.

### **Supplementary figures and tables**

---

**Supplementary Table S1.** EBV-human protein-protein and protein-DNA interactions curated from an authoritative Herpesvirus source [50], VirusMINT and previous reports.

**Supplementary Table S2.** HPV16-human protein-protein interactions curated from VirusMINT.

**Supplementary Figure S1.** Defining the neighborhood of viral targets. P, PT, PM, P<sup>2</sup> represent different possible network configurations.

**Supplementary Figure S2.** EBV average shortest path with **A**, literature-curated PPIs and PDIs are included **B**, Literature-curated PPIs removed from the virus-host interactions and host interactome.

**Supplementary Figure S3.** HPV average shortest path with **A**, literature-curated PPIs and PDIs are included **B**, Literature-curated PPIs removed from the virus-host interactions and host interactome.

**Supplementary Figure S4.** Analysis of viral disease network configurations. **A,B**, with both high-throughput and literature-curated virus-host interaction datasets and host PPIs. **C,D** without the literature-curated virus-host interactions and PPIs.

**Supplementary Table S3.** Configuration analysis for the EBV disease network, **A**, with literature-curated virus-host interactions and literature-curated host PPIs included (values are plotted in Supplementary Figure S4A), **B**, without literature-curated virus-host interactions and literature-curated host PPIs (Supplementary Figure S4C).

**Supplementary Table S4.** Configuration analysis for the HPV disease network. **A**, literature-curated virus-host interactions and literature-curated host PPIs included (values are plotted in Supplementary Figure S4B); **B**, without literature-curated virus-host interactions and literature-curated host PPIs (Supplementary Figure S4D).

**Supplementary Figure S5.** Transcriptional enrichment in disease tissues. **A**, B cell lymphoma cells [13] ( $P = 0.0018$ ). **B**, head and neck squamous cell carcinoma cells [51] ( $P = 0.0037$ ).

**Supplementary Figure S6.** Transcriptional enrichment in the viral disease network measured via gene expression analysis in tissues of selected EBV- and HPV-implicated diseases. M: number of differentially expressed genes in the disease tissue, V: number of genes regulated by virus-targeted transcription factors. The overlap in the Venn diagram indicates the observed number of differentially expressed genes in the viral disease network (the expected number is shown in parenthesis; \* indicates significance; BL  $P = 6.36 \times 10^{-5}$ , BCL  $P = 0.00317$ , CC  $P = 0.000205$ , HNSCC  $P = 0.0025$ ).

**Supplementary Table S5.** Number of differentially expressed genes in tissues of selected EBV and HPV virally implicated diseases and random control.

**Supplementary Figure S7.** Virally implicated diseases associated with genes in the neighborhoods of viral targets for HPV16 when p53-cervical cancer association is included in the OMIM Morbid Map.

**Supplementary Table S6.** Prioritized EBV candidate diseases.

**Supplementary Table S7.** Prioritized HPV candidate diseases.

**Supplementary Figure S8.** Size of giant component in random disease networks. **A**, EBV. **B**, HPV.

**Supplementary Figure S9.** Prioritization of predicted diseases in the EBV and HPV disease networks. **A**, EBV and **B**, HPV precision versus recall graphs at various values of alpha. **C**, EBV and **D**, HPV average relative risk of diseases as a function of rank. The averages are also calculated by omitting the virally implicated diseases. **E**, Average of the logarithm of relative risk for EBV (alpha = 0.7) and HPV (alpha = 0.8) as a function of rank.

**Supplementary Figure S10.** Prioritization obtained from random viral targets. Precision versus recall graphs obtained by random **A**, EBV and **B**, HPV targets. The average relative risk of diseases predicted via random **C**, EBV and **D**, HPV targets as a function of rank.

**Supplementary Table S8.** Comprehensive EBV-human protein-protein interaction dataset, including the source of data. Sources: CCSB (data from Rozenblatt-Rosen, et al, provided herein for clarity), Calderwood *et al* [5], VirusMINT [6] and other.

**Supplementary Table S9.** Comprehensive HPV-human protein-protein interaction dataset, including the source of data. Sources: CCSB (data from Rozenblatt-Rosen, et al, provided herein for clarity), Huh *et al* [7], and VirusMINT [6].

**Supplementary Table S10.** List of genes that show significant expression change in **A**, Burkitt's lymphoma, **B**, B cell lymphoma, **C**, cervical cancer, and **D**, head and neck squamous cell carcinoma.

**Supplementary Table S11.** Raw data for calculating relative risks of candidate diseases in each viral disease network (PT configuration) among female HPV patients.

**Supplementary Table S12.** Raw data for calculating relative risks of candidate diseases in each viral disease network (PT configuration) among male HPV patients.

**Supplementary Table S13.** Raw data for calculating relative risks of candidate diseases in each viral disease network (PT configuration) among EBV patients.

**Supplementary Table S14.** Genes in the network vicinity of viral targets that are differentially expressed in gene expression profiles of normal human diploid fibroblast (IMR90 data from Rozenblatt-Rosen, et al, provided herein for clarity) and primary human keratinocyte (Ker) populations with stable expression of HPV16 E6 or E7 oncoproteins. Known HPV-implicated diseases are highlighted in red.

**Supplementary Table S15.** Tissue specificity analysis of EBV. Genes present and expressed in Burkitt's lymphoma (Raji cells) and B lymphocyte tissues are shown based on the GNF1H dataset in <http://biogps.org> with their expression values and their associated diseases.

**Supplementary Table S16.** Tissue specificity analysis of HPV16. Genes present and expressed in ovary and testis tissues are shown based on the GNF1H dataset in <http://biogps.org> with their expression values and their associated diseases.

**Supplementary Table S17.** OMIM diseases that have significant prevalence among HPV patients. Diseases in bold are in the HPV disease network (Figure 3C).

## Supplementary Figures and Tables

**Supplementary Table S1.** EBV-human protein-protein and protein-DNA interactions curated from an authoritative Herpesvirus source [50], VirusMINT and previous reports.

| Source                      | Viral protein | Human protein | Type |
|-----------------------------|---------------|---------------|------|
| VirusMINT                   | EBNA1         | CSNK2A1       | PPI  |
| VirusMINT                   | EBNA1         | CSNK2A2       | PPI  |
| VirusMINT                   | EBNA1         | EBNA1BP2      | PPI  |
| VirusMINT                   | EBNA1         | KPNA1         | PPI  |
| VirusMINT                   | EBNA1         | NAP1L1        | PPI  |
| VirusMINT                   | EBNA1         | ORC2L         | PPI  |
| VirusMINT                   | EBNA1         | SFRS1         | PPI  |
| VirusMINT                   | EBNA1         | TERF2         | PPI  |
| VirusMINT   ISBN:0521827140 | EBNA1         | USP7          | PPI  |
| VirusMINT   ISBN:0521827140 | LMP1          | TRADD         | PPI  |
| VirusMINT   ISBN:0521827140 | LMP1          | ZMYND11       | PPI  |
| VirusMINT                   | LMP1          | RABAC1        | PPI  |
| ISBN:0521827140             | EBNA1         | RPA1          | PPI  |
| ISBN:0521827140             | EBNA1         | TNPO1         | PPI  |
| ISBN:0521827140             | EBNA2         | DDX20         | PPI  |
| ISBN:0521827140             | EBNA2         | EP300         | PPI  |
| ISBN:0521827140             | EBNA2         | GTF2B         | PPI  |
| ISBN:0521827140             | EBNA2         | GTF2E1        | PPI  |
| ISBN:0521827140             | EBNA2         | GTF2E2        | PPI  |
| ISBN:0521827140             | EBNA2         | GTF2H4        | PPI  |
| ISBN:0521827140             | EBNA2         | MYB           | PPI  |
| ISBN:0521827140             | EBNA2         | SMARCB1       | PPI  |
| ISBN:0521827140             | EBNA2         | SND1          | PPI  |
| ISBN:0521827140             | EBNA2         | SPI1          | PPI  |
| ISBN:0521827140             | EBNA2         | SPIB          | PPI  |
| ISBN:0521827140             | EBNA2         | TBP           | PPI  |
| ISBN:0521827140             | EBNA3         | AHR           | PPI  |
| ISBN:0521827140             | EBNA3         | AIP           | PPI  |
| ISBN:0521827140             | EBNA3         | CCT5          | PPI  |
| ISBN:0521827140             | EBNA3         | CTBP1         | PPI  |
| ISBN:0521827140             | EBNA3         | UPRT          | PPI  |
| ISBN:0521827140             | EBNA6         | DDX20         | PPI  |
| ISBN:0521827140             | EBNA6         | NME1          | PPI  |
| ISBN:0521827140             | EBNA6         | PTMA          | PPI  |
| ISBN:0521827140             | EBNA6         | RBPJ          | PPI  |
| ISBN:0521827140             | EBNA6         | SMN1          | PPI  |

|                               |           |         |           |
|-------------------------------|-----------|---------|-----------|
| ISBN:0521827140               | EBNALP    | AKAP8L  | PPI       |
| ISBN:0521827140               | EBNALP    | CDKN2A  | PPI       |
| ISBN:0521827140               | EBNALP    | HAX1    | PPI       |
| ISBN:0521827140               | EBNALP    | P4HA1   | PPI       |
| ISBN:0521827140               | EBNALP    | RPS3A   | PPI       |
| ISBN:0521827140               | LMP1      | TRAF1   | PPI       |
| ISBN:0521827140               | LMP1      | TRAF2   | PPI       |
| ISBN:0521827140               | LMP1      | TRAF3   | PPI       |
| ISBN:0521827140               | LMP2A     | ITCH    | PPI       |
| ISBN:0521827140               | LMP2A     | LCK     | PPI       |
| ISBN:0521827140               | LMP2A     | LYN     | PPI       |
| ISBN:0521827140               | LMP2A     | NEDD4   | PPI       |
| ISBN:0521827140               | LMP2A     | SRC     | PPI       |
| ISBN:0521827140               | LMP2A     | SYK     | PPI       |
| ISBN:0521827140               | LMP2A     | ZAP70   | PPI       |
| PMID:18039120 ISBN:0521827140 | EBNA2     | RBPJ    | PPI       |
| VirusMINT ISBN:0521827140     | EBNA1     | USP7    | PPI       |
| VirusMINT ISBN:0521827140     | LMP1      | TRADD   | PPI       |
| VirusMINT ISBN:0521827140     | LMP1      | ZMYND11 | PPI       |
| PMID:10725330                 | EB1/BZLF1 | UBN1    | PPI       |
| PMID:12195020                 | EBNA2     | NR4A1   | PPI       |
| PMID:7784177                  | EB1/BZLF1 | RARA    | PPI       |
| PMID:7784177                  | EB1/BZLF1 | RXRA    | PPI       |
| PMID:8114725                  | EB1/BZLF1 | NFKB1   | PPI       |
| PMID:8390666                  | EBNALP    | RB1     | PPI       |
| PMID:8390666                  | EBNALP    | TP53    | PPI       |
| PMID:12438576 PMID:8114724    | EB1/BZLF1 | TP53    | PDI & PPI |
| PMID:18039120                 | EBNA2     | CR2     | PDI       |
| PMID:18039120                 | EBNA2     | FCER2   | PDI       |
| PMID:18039120                 | EBNA2     | FGR     | PDI       |
| PMID:18039120                 | EBNA2     | MYC     | PDI       |
| PMID:7520093                  | LMP1      | BCL2    | PDI       |

**Supplementary Table S2.** HPV16-human protein-protein curated from VirusMINT.

| <b>Viral Protein</b> | <b>Host Protein</b> | <b>Source of interaction</b> |
|----------------------|---------------------|------------------------------|
| <b>E1_HP16</b>       | TRIP13              | VirusMINT                    |
| <b>E1_HP16</b>       | UBE2I               | VirusMINT                    |
| <b>E2_HP16</b>       | BRD4                | VirusMINT                    |
| <b>E2_HP16</b>       | CEBPA               | VirusMINT                    |
| <b>E2_HP16</b>       | CEBPB               | VirusMINT                    |
| <b>E2_HP16</b>       | CITED1              | VirusMINT                    |
| <b>E2_HP16</b>       | GTF2B               | VirusMINT                    |
| <b>E2_HP16</b>       | KAT2B               | VirusMINT                    |
| <b>E2_HP16</b>       | POMP                | VirusMINT                    |
| <b>E2_HP16</b>       | SMN2                | VirusMINT                    |
| <b>E2_HP16</b>       | TBP                 | VirusMINT                    |
| <b>E2_HP16</b>       | TOPBP1              | VirusMINT                    |
| <b>E2_HP16</b>       | TP53                | VirusMINT                    |
| <b>E4_HP16</b>       | SRPK1               | VirusMINT                    |
| <b>E5_HP16</b>       | HLA-A               | VirusMINT                    |
| <b>E6_HP16</b>       | BAK1                | VirusMINT                    |
| <b>E6_HP16</b>       | BRCA1               | VirusMINT                    |
| <b>E6_HP16</b>       | CREBBP              | VirusMINT                    |
| <b>E6_HP16</b>       | DLG1                | VirusMINT                    |
| <b>E6_HP16</b>       | EP300               | VirusMINT                    |
| <b>E6_HP16</b>       | FADD                | VirusMINT                    |
| <b>E6_HP16</b>       | FBLN1               | VirusMINT                    |
| <b>E6_HP16</b>       | GPS2                | VirusMINT                    |
| <b>E6_HP16</b>       | IRF3                | VirusMINT                    |
| <b>E6_HP16</b>       | KPNA2               | VirusMINT                    |
| <b>E6_HP16</b>       | KPNB1               | VirusMINT                    |
| <b>E6_HP16</b>       | MAGI1               | VirusMINT                    |
| <b>E6_HP16</b>       | MCM7                | VirusMINT                    |
| <b>E6_HP16</b>       | MYC                 | VirusMINT                    |
| <b>E6_HP16</b>       | PTPN3               | VirusMINT                    |
| <b>E6_HP16</b>       | RCN2                | VirusMINT                    |
| <b>E6_HP16</b>       | SCRIB               | VirusMINT                    |
| <b>E6_HP16</b>       | SERTAD1             | VirusMINT                    |
| <b>E6_HP16</b>       | SIPA1L1             | VirusMINT                    |
| <b>E6_HP16</b>       | TAX1BP3             | VirusMINT                    |
| <b>E6_HP16</b>       | TNFRSF1A            | VirusMINT                    |
| <b>E6_HP16</b>       | TNPO1               | VirusMINT                    |
| <b>E6_HP16</b>       | TP53                | VirusMINT                    |
| <b>E6_HP16</b>       | TP73                | VirusMINT                    |
| <b>E6_HP16</b>       | TSC2                | VirusMINT                    |

---

|                |         |                        |
|----------------|---------|------------------------|
| <b>E6_HP16</b> | UBE3A   | VirusMINT              |
| <b>E6_HP16</b> | XRCC1   | VirusMINT              |
| <b>E7_HP16</b> | AKAP8   | Huh et al.             |
| <b>E7_HP16</b> | AKAP8L  | Huh et al.             |
| <b>E7_HP16</b> | ALPL    | Huh et al.             |
| <b>E7_HP16</b> | BRCA1   | VirusMINT              |
| <b>E7_HP16</b> | CAD     | Huh et al.             |
| <b>E7_HP16</b> | CBX4    | Huh et al.             |
| <b>E7_HP16</b> | CCNA2   | VirusMINT/Huh et al.   |
| <b>E7_HP16</b> | CCNE2   | VirusMINT/Huh et al.   |
| <b>E7_HP16</b> | CCT2    | Huh et al.             |
| <b>E7_HP16</b> | CCT4    | Huh et al.             |
| <b>E7_HP16</b> | CCT8    | Huh et al.             |
| <b>E7_HP16</b> | CDC2    | VirusMINT/Huh et al.   |
| <b>E7_HP16</b> | CDK2    | VirusMINT/Huh et al.   |
| <b>E7_HP16</b> | CDKN1A  | VirusMINT              |
| <b>E7_HP16</b> | CHD4    | VirusMINT              |
| <b>E7_HP16</b> | COPA    | Huh et al.             |
| <b>E7_HP16</b> | CREBBP  | VirusMINT              |
| <b>E7_HP16</b> | CTTN    | Huh et al.             |
| <b>E7_HP16</b> | CUL2    | Huh et al.             |
| <b>E7_HP16</b> | DDX17   | Huh et al.             |
| <b>E7_HP16</b> | DNAJA1  | Huh et al.             |
| <b>E7_HP16</b> | DNAJA3  | VirusMINT              |
| <b>E7_HP16</b> | E2F1    | Huh et al.   VirusMINT |
| <b>E7_HP16</b> | E2F2    | Huh et al.   VirusMINT |
| <b>E7_HP16</b> | E2F3    | Huh et al.   VirusMINT |
| <b>E7_HP16</b> | E2F4    | Huh et al.   VirusMINT |
| <b>E7_HP16</b> | E2F5    | Huh et al.             |
| <b>E7_HP16</b> | E2F6    | Huh et al.             |
| <b>E7_HP16</b> | E7_HP16 | Huh et al.             |
| <b>E7_HP16</b> | EIF3F   | Huh et al.             |
| <b>E7_HP16</b> | EIF3I   | Huh et al.             |
| <b>E7_HP16</b> | EIF4A1  | Huh et al.             |
| <b>E7_HP16</b> | EIF4B   | Huh et al.             |
| <b>E7_HP16</b> | EP300   | VirusMINT              |
| <b>E7_HP16</b> | FLNA    | Huh et al.             |
| <b>E7_HP16</b> | FOS     | VirusMINT              |
| <b>E7_HP16</b> | FOX11   | VirusMINT              |
| <b>E7_HP16</b> | FUS     | Huh et al.             |
| <b>E7_HP16</b> | GATAD2B | Huh et al.             |
| <b>E7_HP16</b> | HDAC1   | VirusMINT              |
| <b>E7_HP16</b> | HDAC2   | VirusMINT              |
| <b>E7_HP16</b> | HNRNPC  | Huh et al.             |

---



---

|                |                 |                        |
|----------------|-----------------|------------------------|
| <b>E7_HP16</b> | <b>HNRNP2</b>   | Huh et al.             |
| <b>E7_HP16</b> | <b>HNRNPF</b>   | Huh et al.             |
| <b>E7_HP16</b> | <b>HNRNPG</b>   | Huh et al.             |
| <b>E7_HP16</b> | <b>HNRNPH1</b>  | Huh et al.             |
| <b>E7_HP16</b> | <b>HNRNPK</b>   | Huh et al.             |
| <b>E7_HP16</b> | <b>HNRNPM</b>   | Huh et al.             |
| <b>E7_HP16</b> | <b>HSPA5</b>    | Huh et al.             |
| <b>E7_HP16</b> | <b>HSPA8</b>    | Huh et al.             |
| <b>E7_HP16</b> | <b>IQGAP1</b>   | Huh et al.             |
| <b>E7_HP16</b> | <b>IRF1</b>     | VirusMINT              |
| <b>E7_HP16</b> | <b>JUN</b>      | VirusMINT              |
| <b>E7_HP16</b> | <b>JUNB</b>     | VirusMINT              |
| <b>E7_HP16</b> | <b>JUND</b>     | VirusMINT              |
| <b>E7_HP16</b> | <b>KAT2B</b>    | VirusMINT              |
| <b>E7_HP16</b> | <b>KCMF1</b>    | Huh et al.             |
| <b>E7_HP16</b> | <b>KIAA1949</b> | Huh et al.             |
| <b>E7_HP16</b> | <b>KIAA1967</b> | Huh et al.             |
| <b>E7_HP16</b> | <b>L3MBTL2</b>  | Huh et al.             |
| <b>E7_HP16</b> | <b>MAP7</b>     | Huh et al.             |
| <b>E7_HP16</b> | <b>MATR3</b>    | Huh et al.             |
| <b>E7_HP16</b> | <b>MGA</b>      | Huh et al.             |
| <b>E7_HP16</b> | <b>MTA2</b>     | Huh et al.             |
| <b>E7_HP16</b> | <b>MYC</b>      | VirusMINT              |
| <b>E7_HP16</b> | <b>NCOA1</b>    | Huh et al.             |
| <b>E7_HP16</b> | <b>NFIL3</b>    | Huh et al.             |
| <b>E7_HP16</b> | <b>NOLC1</b>    | VirusMINT              |
| <b>E7_HP16</b> | <b>NUMA1</b>    | Huh et al.             |
| <b>E7_HP16</b> | <b>PCGF6</b>    | Huh et al.             |
| <b>E7_HP16</b> | <b>PFKL</b>     | Huh et al.             |
| <b>E7_HP16</b> | <b>PHC3</b>     | Huh et al.             |
| <b>E7_HP16</b> | <b>PHGDH</b>    | Huh et al.             |
| <b>E7_HP16</b> | <b>PKM2</b>     | VirusMINT              |
| <b>E7_HP16</b> | <b>PLCB3</b>    | Huh et al.             |
| <b>E7_HP16</b> | <b>POU5F1</b>   | VirusMINT              |
| <b>E7_HP16</b> | <b>PPP1CA</b>   | Huh et al.             |
| <b>E7_HP16</b> | <b>PPP2CA</b>   | VirusMINT              |
| <b>E7_HP16</b> | <b>PPP2R1A</b>  | VirusMINT              |
| <b>E7_HP16</b> | <b>PRMT5</b>    | Huh et al.             |
| <b>E7_HP16</b> | <b>PRPH</b>     | Huh et al.             |
| <b>E7_HP16</b> | <b>PSMC1</b>    | VirusMINT              |
| <b>E7_HP16</b> | <b>RAN</b>      | VirusMINT              |
| <b>E7_HP16</b> | <b>RB1</b>      | Huh et al.   VirusMINT |
| <b>E7_HP16</b> | <b>RBBP7</b>    | Huh et al.             |
| <b>E7_HP16</b> | <b>RBL1</b>     | VirusMINT/Huh et al.   |

---

---

|                |            |                        |
|----------------|------------|------------------------|
| <b>E7_HP16</b> | RBL2       | Huh et al.   VirusMINT |
| <b>E7_HP16</b> | RCOR1      | Huh et al.             |
| <b>E7_HP16</b> | RFC2       | Huh et al.             |
| <b>E7_HP16</b> | RIF1       | Huh et al.             |
| <b>E7_HP16</b> | RING1      | Huh et al.             |
| <b>E7_HP16</b> | RNF2       | Huh et al.             |
| <b>E7_HP16</b> | RPS25      | VirusMINT              |
| <b>E7_HP16</b> | RUVBL2     | Huh et al.             |
| <b>E7_HP16</b> | SAP130     | Huh et al.             |
| <b>E7_HP16</b> | SAP155     | Huh et al.             |
| <b>E7_HP16</b> | SIVA1      | VirusMINT              |
| <b>E7_HP16</b> | SNW1       | VirusMINT              |
| <b>E7_HP16</b> | SQSTM1     | Huh et al.             |
| <b>E7_HP16</b> | STK38      | Huh et al.             |
| <b>E7_HP16</b> | TAF15      | Huh et al.             |
| <b>E7_HP16</b> | TARDBP     | Huh et al.             |
| <b>E7_HP16</b> | TBL1XR1    | Huh et al.             |
| <b>E7_HP16</b> | TBL1Y      | Huh et al.             |
| <b>E7_HP16</b> | TBP        | VirusMINT              |
| <b>E7_HP16</b> | TFDP1      | VirusMINT/Huh et al.   |
| <b>E7_HP16</b> | TFDP2      | VirusMINT/Huh et al.   |
| <b>E7_HP16</b> | TRIP13     | Huh et al.             |
| <b>E7_HP16</b> | TUBA1C     | Huh et al.             |
| <b>E7_HP16</b> | TUBA3C     | Huh et al.             |
| <b>E7_HP16</b> | TUBA4A     | Huh et al.             |
| <b>E7_HP16</b> | TUBB2A     | Huh et al.             |
| <b>E7_HP16</b> | UBR4       | Huh et al.             |
| <b>E7_HP16</b> | UBR5       | Huh et al.             |
| <b>E7_HP16</b> | VIM        | Huh et al.             |
| <b>E7_HP16</b> | WDR5       | Huh et al.             |
| <b>E7_HP16</b> | WDR77      | Huh et al.             |
| <b>E7_HP16</b> | ZER1       | Huh et al.             |
| <b>L1_HP16</b> | IPO5       | VirusMINT              |
| <b>L1_HP16</b> | KPNA2      | VirusMINT              |
| <b>L1_HP16</b> | KPNB1      | VirusMINT              |
| <b>L1_HP16</b> | TNPO1      | VirusMINT              |
| <b>L2_HP16</b> | GADD45GIP1 | VirusMINT              |
| <b>L2_HP16</b> | IPO5       | VirusMINT              |
| <b>L2_HP16</b> | KPNA2      | VirusMINT              |
| <b>L2_HP16</b> | KPNB1      | VirusMINT              |
| <b>L2_HP16</b> | MAN2B1     | VirusMINT              |
| <b>L2_HP16</b> | PATZ1      | VirusMINT              |
| <b>L2_HP16</b> | TINAGL1    | VirusMINT              |
| <b>L2_HP16</b> | TNPO1      | VirusMINT              |

---

**Figure S1. Defining the neighborhood of viral targets.** P, PT, PM, P<sup>2</sup> represent different possible network configurations.

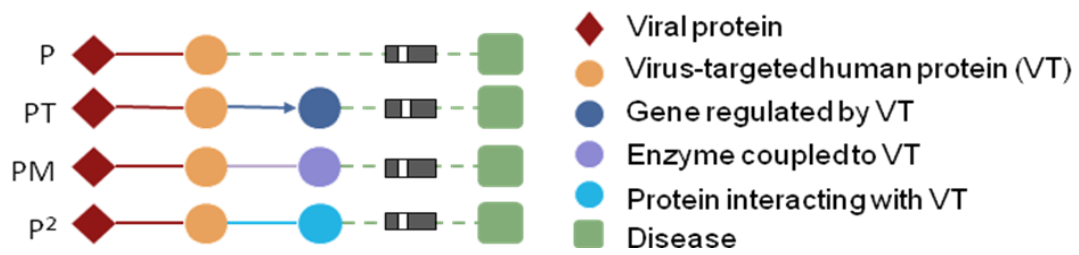

**Supplementary Figure S2. EBV average shortest path.** **A**, literature-curated PPIs and PDIs are included in the host interactome, and **B**, Literature-curated PPIs are removed, but PDIs are included.

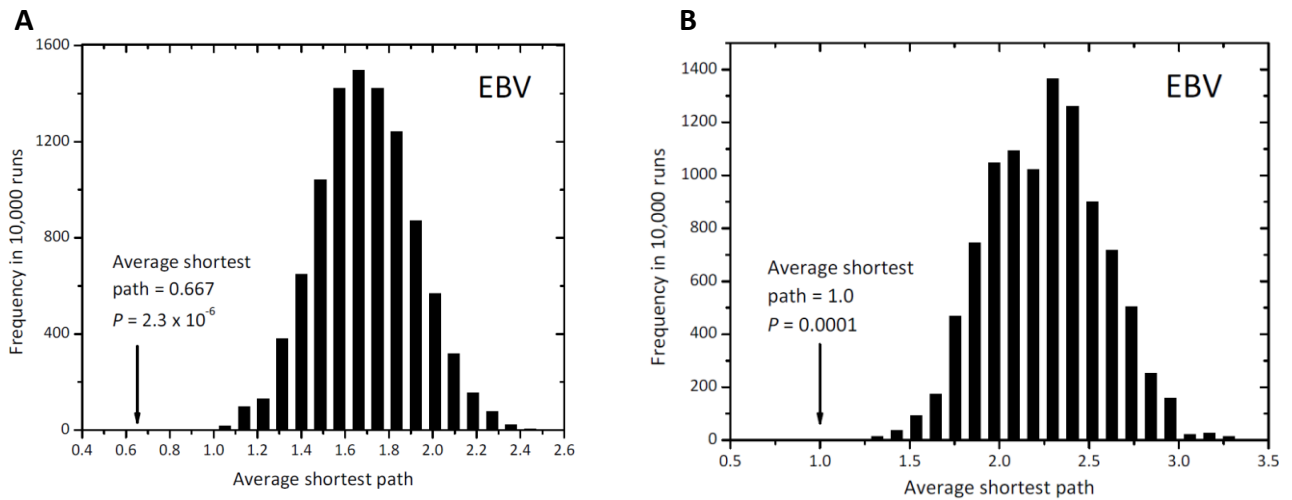

**Supplementary Figure S3. HPV16 average shortest path.** **A**, Literature-curated PPIs and PDIs are included in the host interactome, and **B**, Literature-curated PPIs are removed, but PDIs are included.

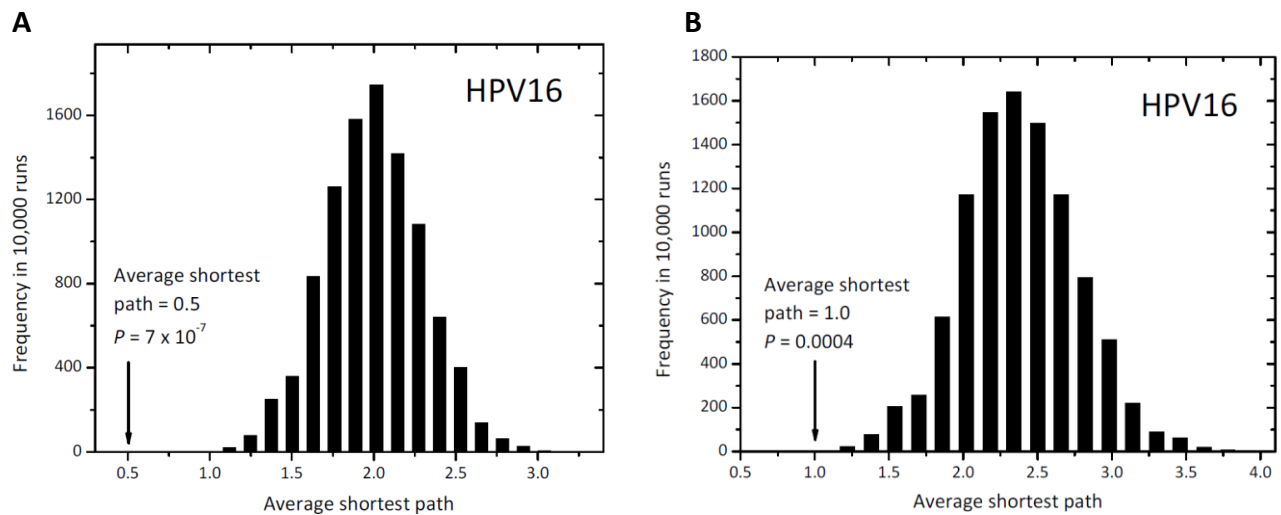

**Supplementary Figure S4. Analysis of viral disease network configurations. A,B,** with both high-throughput and literature-curated virus-host interaction datasets and host PPIs. **C,D,** without the literature-curated virus-host interactions and PPIs.

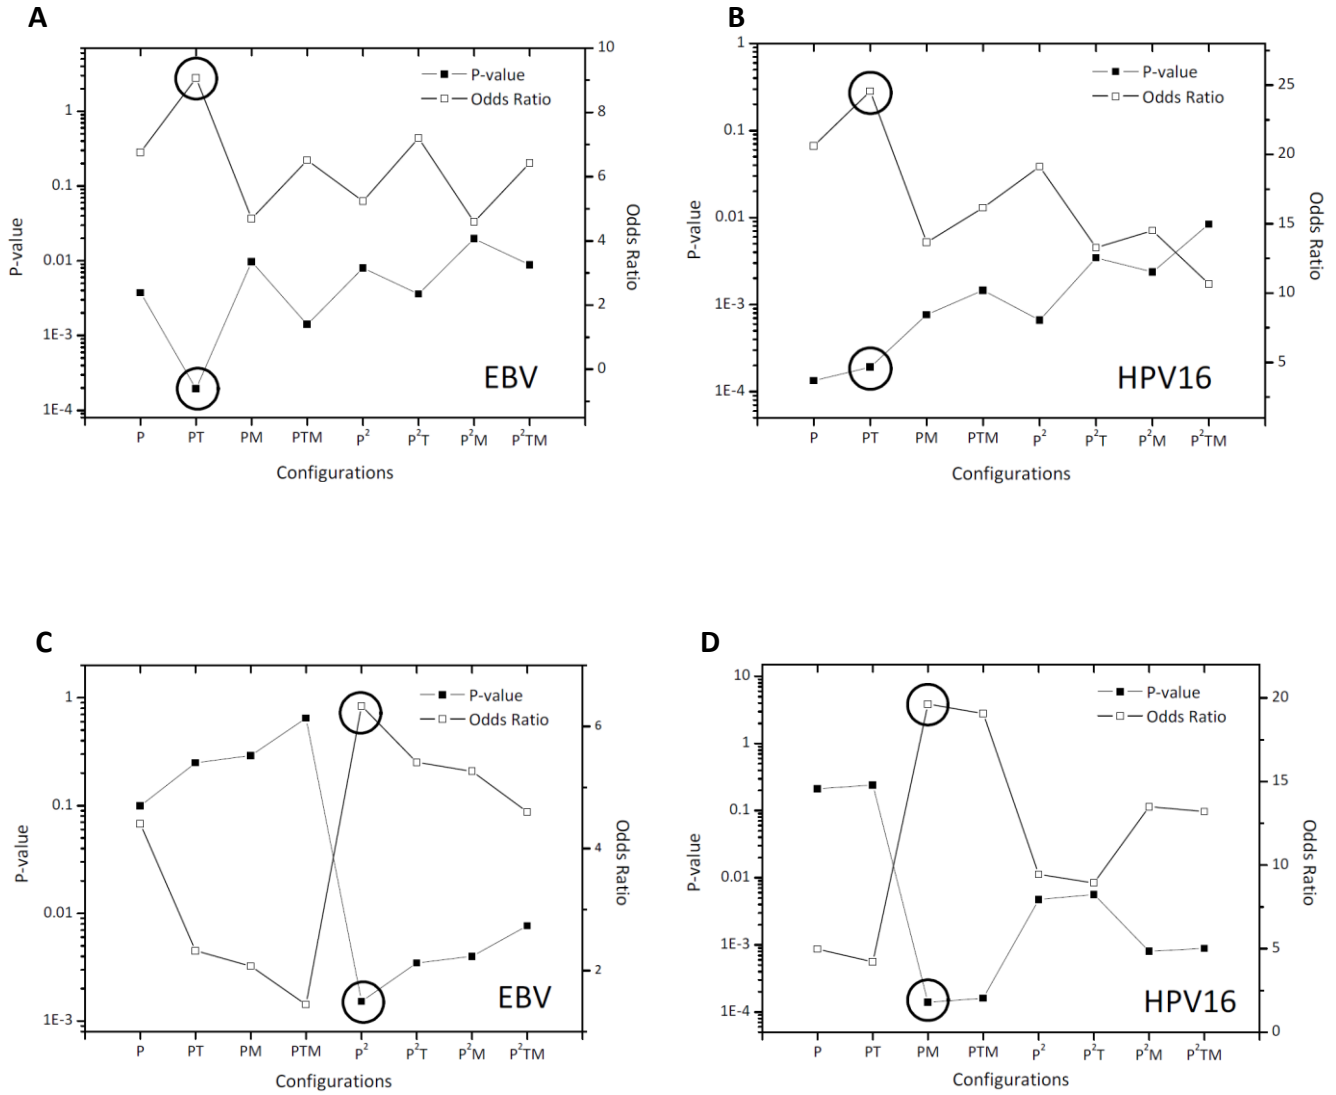

**Supplementary Table S3.** Configuration analysis for the EBV viral disease network **A**, with literature curated virus-host interactions (Supplementary Figure S4A). **B** without literature-curated virus-host interactions and literature-curated PPI (values are plotted in Supplementary Figure S4C).

**A**

| Virus | Configurations    | Virally implicated diseases | All diseases | P-value  | Odds ratio |
|-------|-------------------|-----------------------------|--------------|----------|------------|
| EBV   | P                 | 5                           | 56           | 3.75E-03 | 6.75       |
| EBV   | PT                | 9                           | 128          | 1.94E-04 | 9.068      |
| EBV   | PM                | 6                           | 99           | 0.0097   | 4.692      |
| EBV   | PTM               | 9                           | 163          | 0.0014   | 6.507      |
| EBV   | P <sup>2</sup>    | 10                          | 243          | 0.0080   | 5.237      |
| EBV   | P <sup>2</sup> T  | 11                          | 270          | 0.0036   | 7.199      |
| EBV   | P <sup>2</sup> M  | 10                          | 262          | 0.0197   | 4.592      |
| EBV   | P <sup>2</sup> TM | 11                          | 287          | 0.0087   | 6.42       |

**B**

| Virus | Configurations    | Virally implicated diseases | All diseases | P-value | Odds ratio |
|-------|-------------------|-----------------------------|--------------|---------|------------|
| EBV   | P                 | 2                           | 26           | 0.099   | 4.404      |
| EBV   | PT                | 2                           | 46           | 0.2494  | 2.326      |
| EBV   | PM                | 2                           | 51           | 0.2899  | 2.071      |
| EBV   | PTM               | 2                           | 70           | 0.6491  | 1.443      |
| EBV   | P <sup>2</sup>    | 8                           | 129          | 0.0015  | 6.334      |
| EBV   | P <sup>2</sup> T  | 8                           | 145          | 0.0035  | 5.411      |
| EBV   | P <sup>2</sup> M  | 8                           | 148          | 0.004   | 5.262      |
| EBV   | P <sup>2</sup> TM | 8                           | 163          | 0.0077  | 4.6        |

**Supplementary Table S4.** Configuration analysis for the HPV16 viral disease network. **A**, with literature-curated virus-host interactions (Supplementary Figure S4B). **B**, without literature-curated virus-host interactions (values are plotted in Supplementary Figure S4D).

**A**

| Virus | Configurations    | Virally implicated diseases | All diseases | P-value  | Odds ratio |
|-------|-------------------|-----------------------------|--------------|----------|------------|
| HPV16 | P                 | 5                           | 50           | 1.34E-04 | 20.62      |
| HPV16 | PT                | 7                           | 141          | 0.00019  | 24.56      |
| HPV16 | PM                | 6                           | 115          | 0.00076  | 13.65      |
| HPV16 | PTM               | 7                           | 190          | 0.00146  | 16.15      |
| HPV16 | P <sup>2</sup>    | 7                           | 169          | 0.00066  | 19.13      |
| HPV16 | P <sup>2</sup> T  | 7                           | 216          | 0.00346  | 13.28      |
| HPV16 | P <sup>2</sup> M  | 7                           | 204          | 0.00236  | 14.51      |
| HPV16 | P <sup>2</sup> TM | 7                           | 247          | 0.00838  | 10.67      |

**B**

| Virus | Configurations    | Virally implicated diseases | All diseases | P-value | Odds ratio |
|-------|-------------------|-----------------------------|--------------|---------|------------|
| HPV16 | P                 | 1                           | 18           | 0.2107  | 4.981      |
| HPV16 | PT                | 1                           | 21           | 0.2418  | 4.216      |
| HPV16 | PM                | 6                           | 86           | 0.00014 | 19.63      |
| HPV16 | PTM               | 6                           | 88           | 0.00016 | 19.08      |
| HPV16 | P <sup>2</sup>    | 4                           | 62           | 0.00474 | 9.447      |
| HPV16 | P <sup>2</sup> T  | 4                           | 65           | 0.00566 | 8.937      |
| HPV16 | P <sup>2</sup> M  | 6                           | 116          | 0.00080 | 13.5       |
| HPV16 | P <sup>2</sup> TM | 6                           | 118          | 0.00088 | 13.21      |

**Supplementary Figure S5.** Transcriptional enrichment in disease tissues.

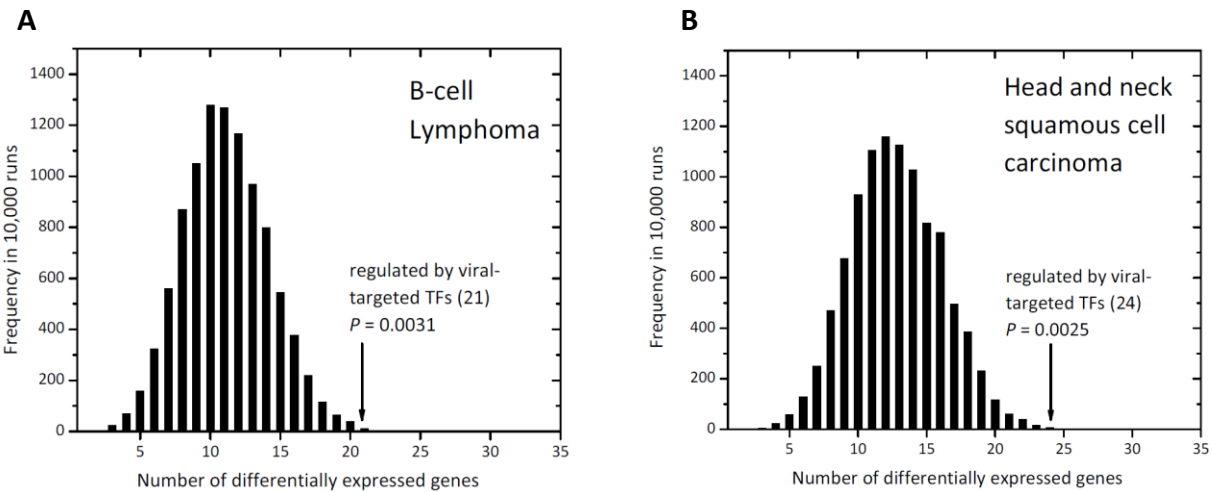



**Supplementary Figure S6.** Transcriptional enrichment in the viral disease network measured via gene expression analysis in tissues of selected EBV- and HPV- implicated diseases. M: number of differentially expressed genes in the disease tissue, V: number of genes regulated by virus-targeted transcription factors. The overlap in the Venn diagram indicates the observed number of differentially expressed genes in the viral disease network (the expected number is shown in parenthesis; \* indicates significance; p-values reported in the text).

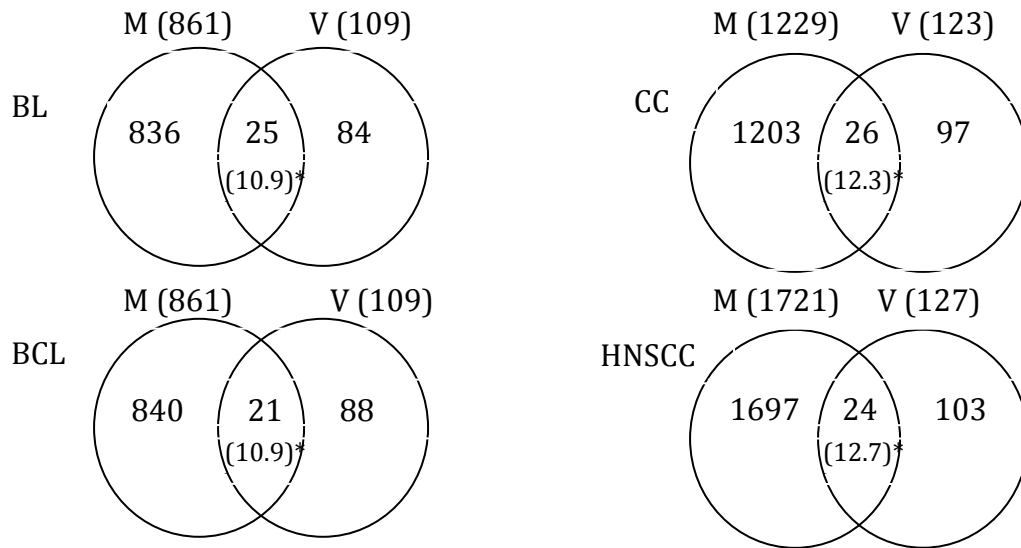

**Supplementary Table S5:** Number of differentially expressed genes in tissues of selected EBV and HPV virally implicated diseases and random control by choosing different cutoffs in gene expression analysis.

| Viral disease network | Genes regulated by VTs | Diseases           | Cutoff | Genes regulated by VTs and significantly up/down-regulated (Overlap) | Overlap in random viral disease network (average) |
|-----------------------|------------------------|--------------------|--------|----------------------------------------------------------------------|---------------------------------------------------|
| EBV                   | 109                    | Burkitt's lymphoma | 2%     | 12                                                                   | 4.36                                              |
|                       |                        |                    | 5%     | 25                                                                   | 10.9                                              |
|                       |                        |                    | 10%    | 36                                                                   | 21.8                                              |
|                       |                        | B cell lymphoma    | 2%     | 11                                                                   | 4.36                                              |
|                       |                        |                    | 5%     | 21                                                                   | 10.9                                              |
|                       |                        |                    | 10%    | 40                                                                   | 21.8                                              |
| HPV16                 | 123                    | Cervical Cancer    | 2%     | 12                                                                   | 4.92                                              |
|                       |                        |                    | 5%     | 26                                                                   | 12.3                                              |
|                       |                        |                    | 10%    | 41                                                                   | 24.6                                              |
|                       |                        | HNSCC              | 2%     | 13                                                                   | 4.92                                              |
|                       |                        |                    | 5%     | 24                                                                   | 12.3                                              |
|                       |                        |                    | 10%    | 31                                                                   | 24.6                                              |

**Supplementary Figure S7.** Distribution of number of virally implicated diseases hit by random HPV neighborhoods when p53-cervical cancer association is included in the OMIM Morbid Map.

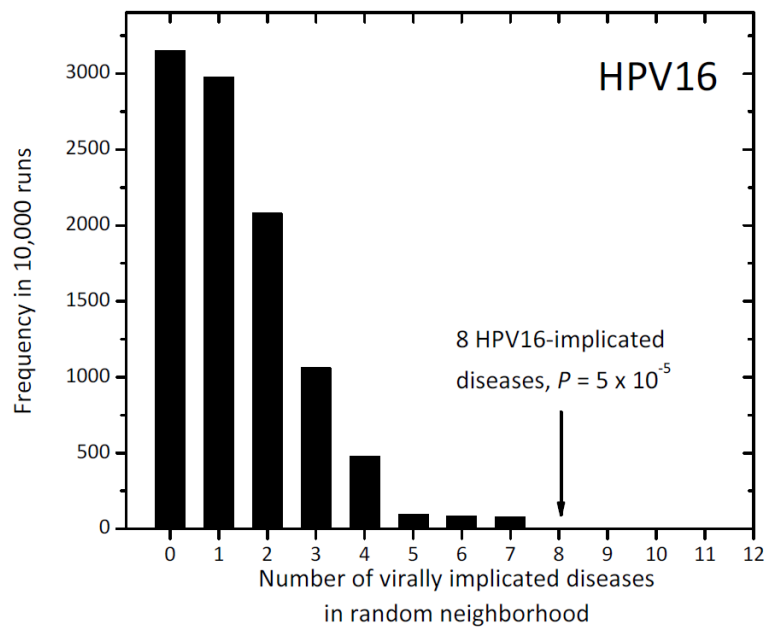

**Supplementary Figure S8.** Size of the giant component in the random viral disease networks **A**, EBV and **B**, HPV. The arrows indicate the real viral disease network size (EBV size = 253, HPV size = 220)

**A**

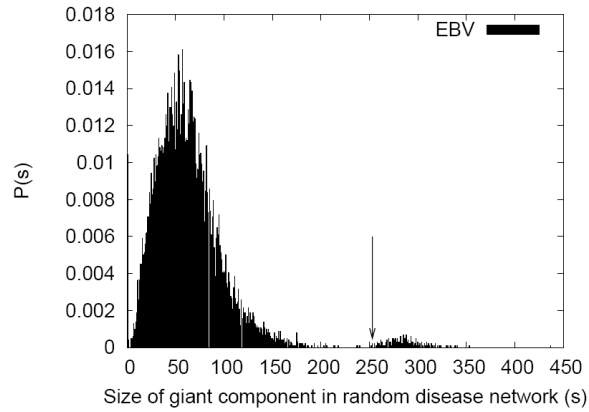

**B**

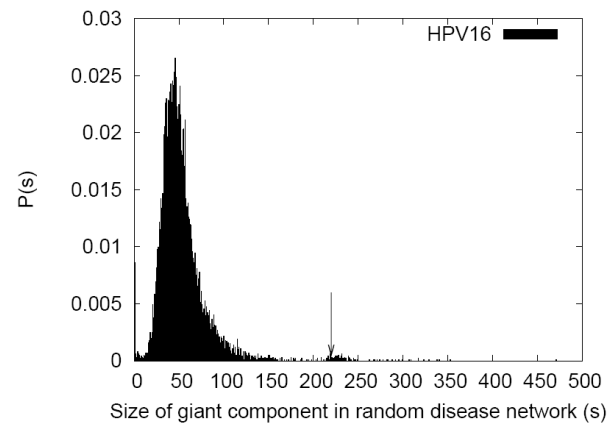

**C**

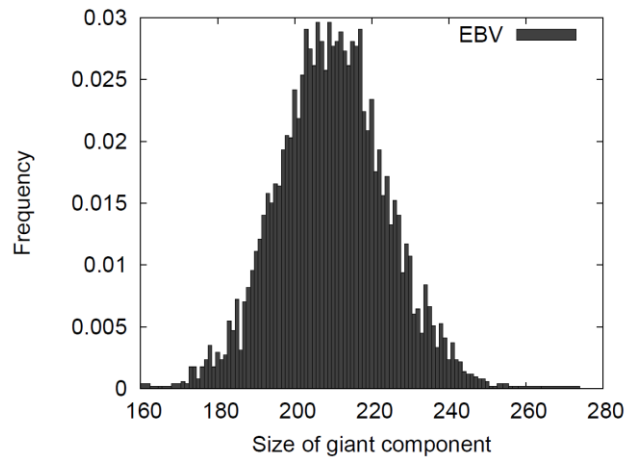

**D**

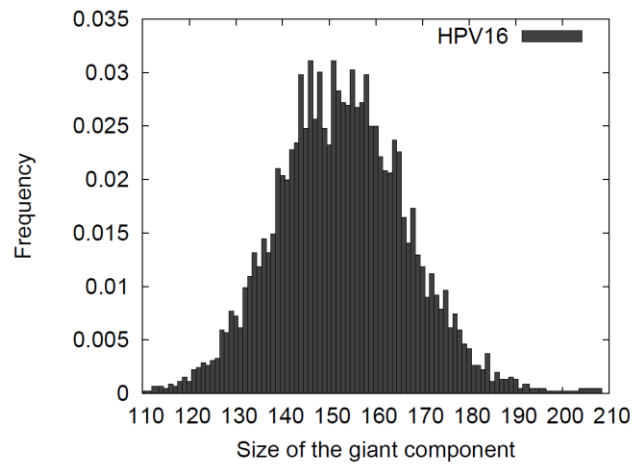

**Supplementary Figure S9.** Prioritization of candidate diseases in the EBV and HPV disease networks. Precision versus recall for various values of alpha for **A**, EBV and **B**, HPV. Average relative risk of diseases as a function of rank are shown for **C**, EBV and **D**, HPV. The averages are also calculated by omitting the virally implicated diseases (GSPs in the prioritization algorithm). **E**, Average of the logarithm of relative risk is shown for EBV (alpha=0.7) and HPV (alpha=0.8) as a function of rank.

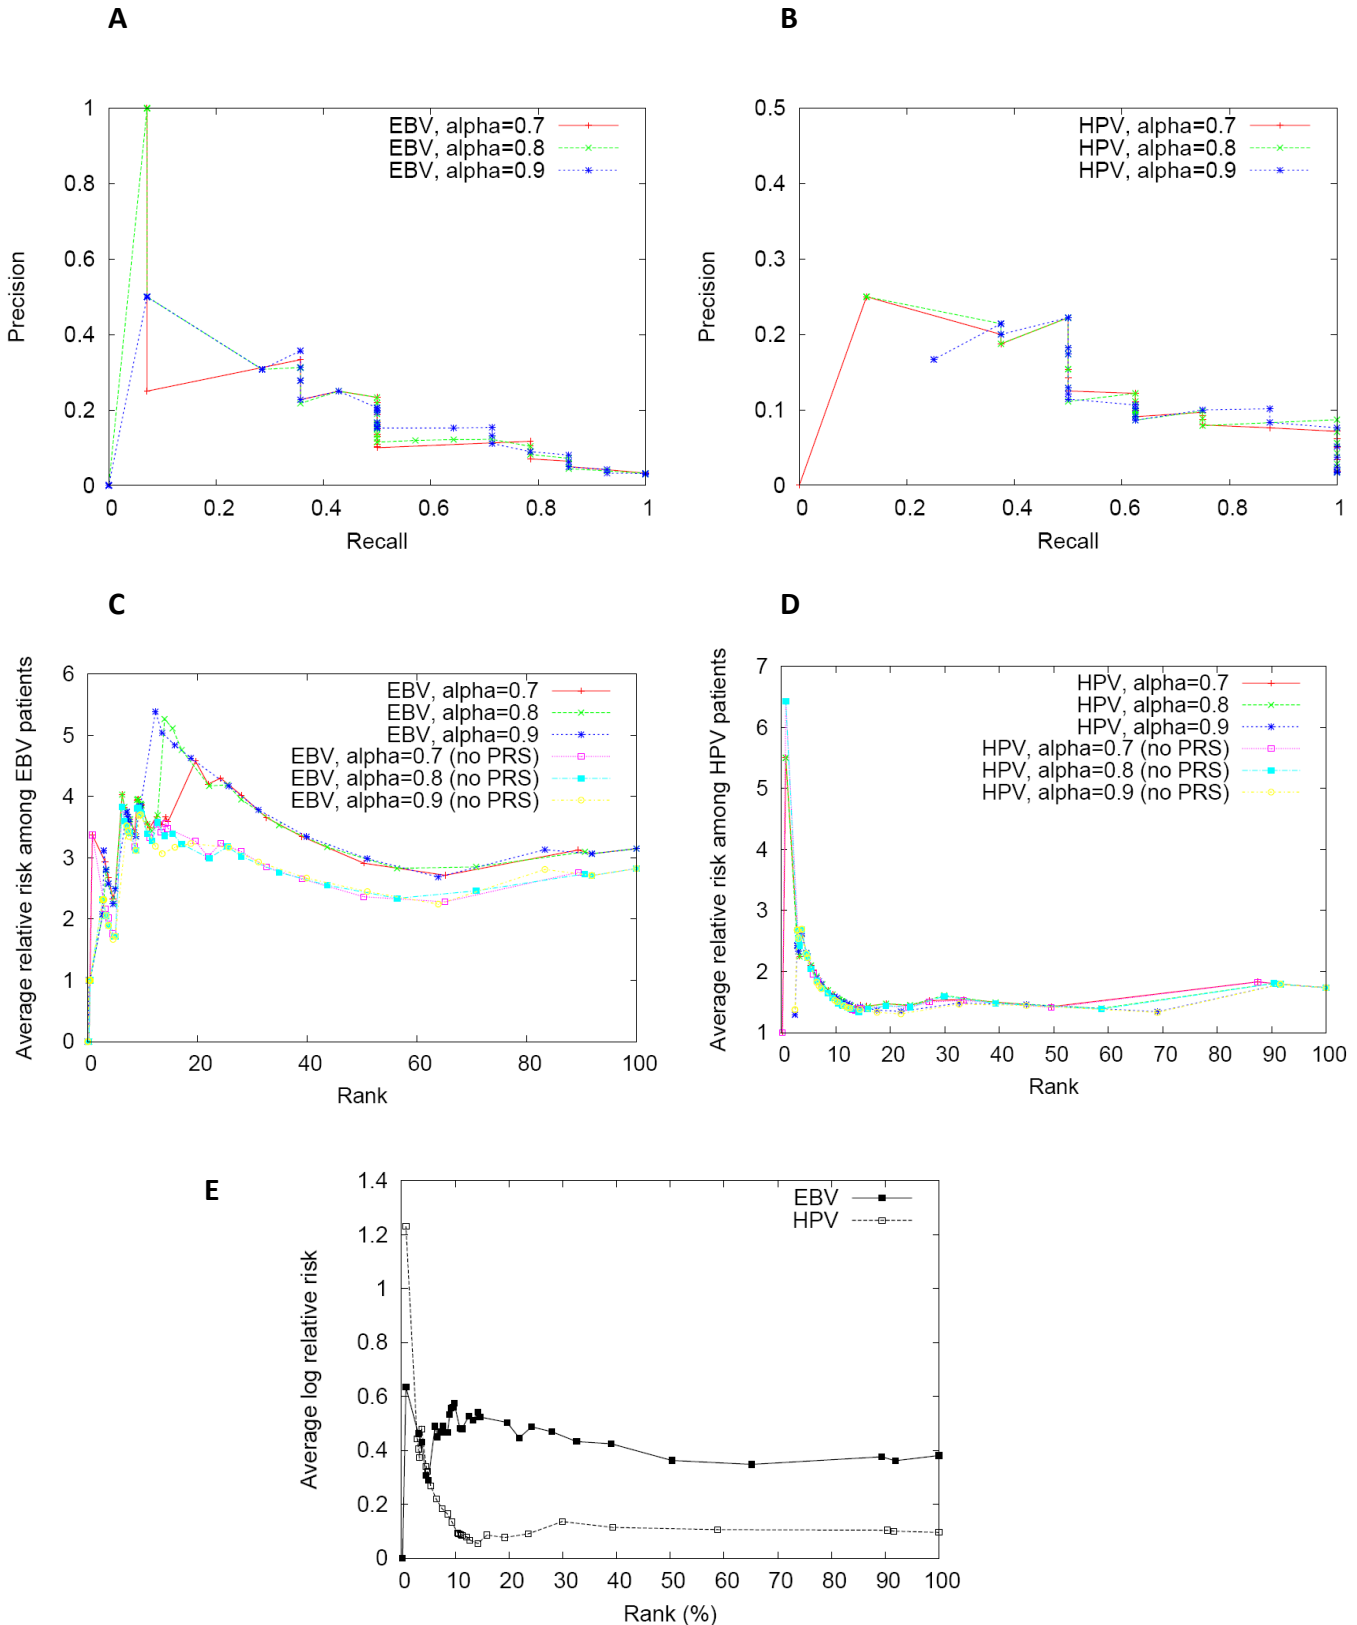

**Supplementary Figure S10.** Prioritization obtained from random viral targets.

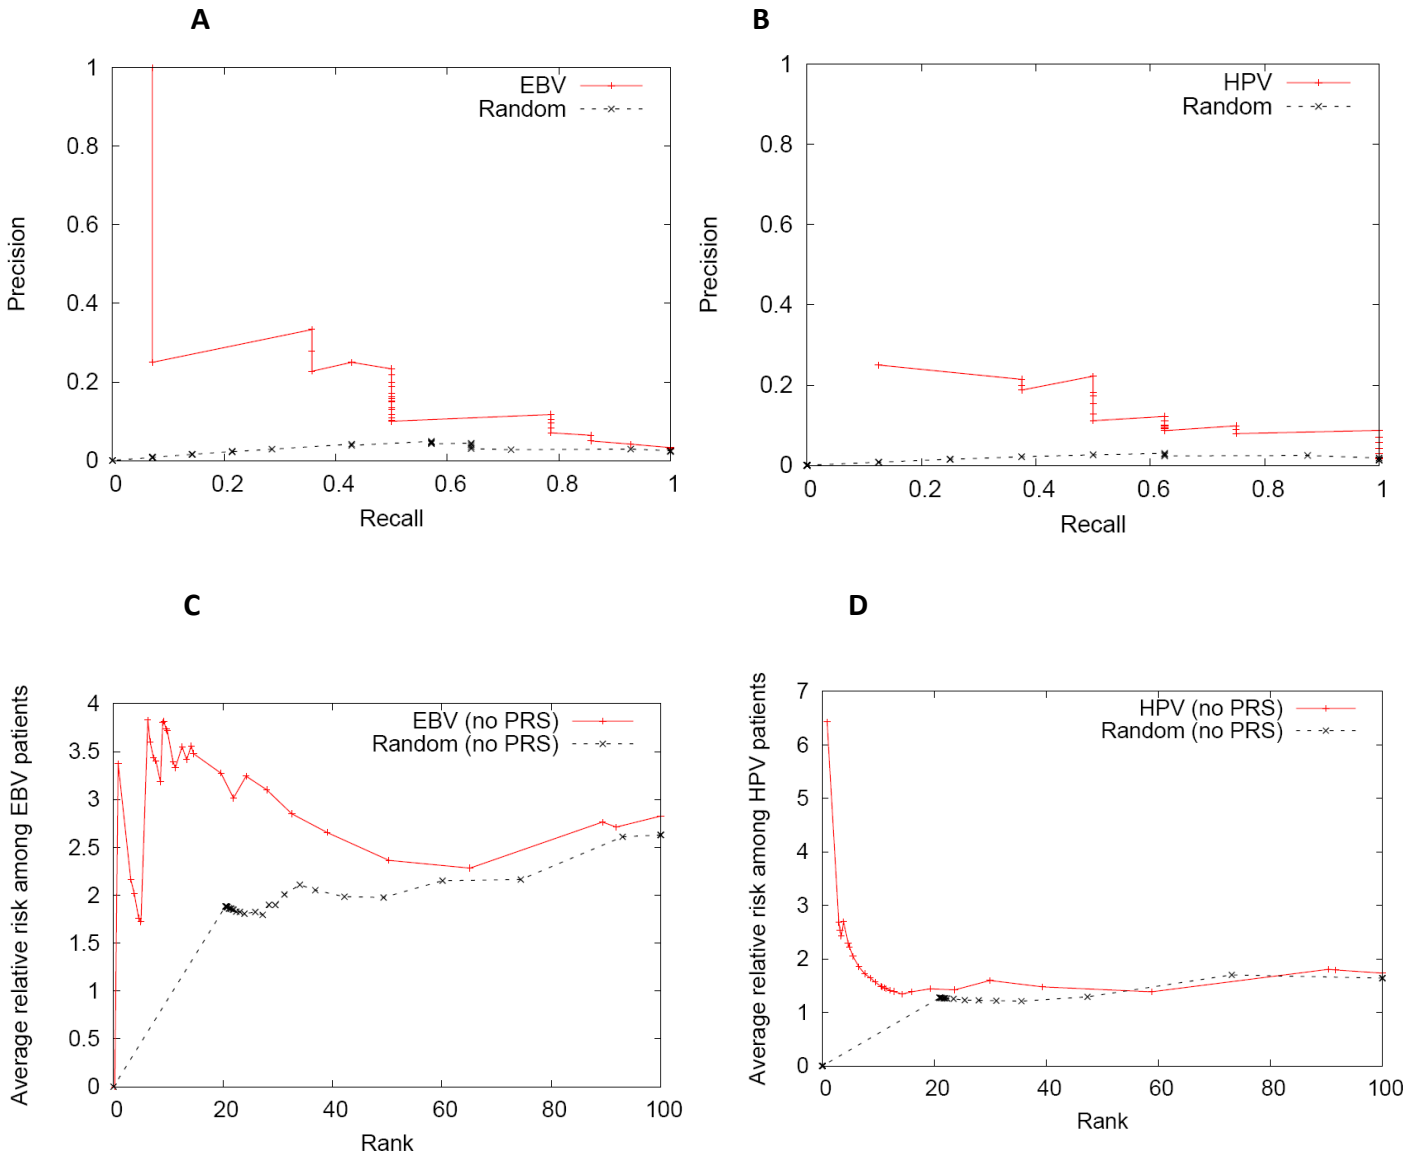

**Supplementary Table S6.** Prioritized EBV disease candidates according to prioritization score derived from flow algorithm. Marked diseases (\*) are virally implicated diseases.

| ICD-9 code | RR in patients | EBV | ICD-9 description                                                   | Max score |
|------------|----------------|-----|---------------------------------------------------------------------|-----------|
| 200.2*     | 522.10         |     | Burkitt's tumor or lymphoma                                         | 0.597     |
| 190.5      | 1.00           |     | Malignant neoplasm of eye, Retina                                   | 0.497     |
| 170.9      | 8.32           |     | Malignant neoplasm of bone and articular cartilage                  | 0.497     |
| 188.9      | 0.81           |     | Malignant neoplasm of bladder                                       | 0.497     |
| 208.9*     | 14.58          |     | Leukemia/lymphoma                                                   | 0.467     |
| 147.9*     | 522.10         |     | Malignant neoplasm of nasopharynx                                   | 0.465     |
| 216.9      | 1.94           |     | Benign neoplasm of skin                                             | 0.465     |
| 259.2      | 1.00           |     | Other endocrine disorders, Carcinoid syndrome                       | 0.465     |
| V84.01     | 1.00           |     | Genetic susceptibility to malignant neoplasm of breast              | 0.465     |
| 157.8      | 1.00           |     | Malignant neoplasm of pancreas                                      | 0.465     |
| 194        | 2.80           |     | Malignant neoplasm of other endocrine glands and related structures | 0.465     |
| 211.5*     | 1.00           |     | Benign neoplasm of liver                                            | 0.465     |
| 239.3*     | 1.00           |     | Neoplasms of unspecified nature, Breast                             | 0.465     |
| 193        | 2.80           |     | Malignant neoplasm of thyroid gland                                 | 0.465     |
| 153        | 1.00           |     | Malignant neoplasm of colon                                         | 0.465     |
| 569.89     | 2.54           |     | Other specified disorders of intestine                              | 0.430     |
| 356.1      | 2.61           |     | Peroneal muscular atrophy                                           | 0.416     |
| 286.4      | 1.00           |     | von Willebrand's disease                                            | 0.414     |
| 272.6      | 1.00           |     | Lipodystrophy                                                       | 0.412     |
| 333.4      | 1.00           |     | Huntington's chorea                                                 | 0.412     |
| 334.3      | 1.00           |     | Spinocerebellar disease                                             | 0.412     |
| 332        | 0.69           |     | Parkinson's disease                                                 | 0.412     |

**Supplementary Table S7.** Prioritized HPV disease candidates according to prioritization score derived from flow algorithm. Marked diseases (\*) are virally implicated diseases.

| ICD-9 code | RR in female HPV patients | ICD-9 description                                      | Max score |
|------------|---------------------------|--------------------------------------------------------|-----------|
| 277.3      | 1.000                     | Amyloidosis                                            | 0.508     |
| 190.5      | 15.738                    | Malignant neoplasm of eye, Retina                      | 0.373     |
| 188.9*     | 2.724                     | Malignant neoplasm of bladder                          | 0.373     |
| 170.9      | 2.550                     | Malignant neoplasm of bone and articular cartilage     | 0.373     |
| V84.01     | 1.000                     | Genetic susceptibility to malignant neoplasm of breast | 0.356     |
| 259.2      | 1.000                     | Other endocrine disorders, Carcinoid syndrome          | 0.356     |
| 239.3*     | 1.000                     | Neoplasms of unspecified nature, Breast                | 0.356     |
| 216.9      | 3.216                     | Benign neoplasm of skin                                | 0.356     |
| 211.5      | 1.000                     | Benign neoplasm of liver and biliary passages          | 0.356     |
| 194        | 1.000                     | Malignant neoplasm of other endocrine glands           | 0.356     |
| 193        | 1.000                     | Malignant neoplasm of thyroid gland                    | 0.356     |
| 157.8      | 1.000                     | Malignant neoplasm of pancreas                         | 0.356     |
| 153*       | 0.754                     | Malignant neoplasm of colon                            | 0.356     |
| 147.9      | 1.000                     | Malignant neoplasm of nasopharynx                      | 0.356     |
| 759.89     | 1.000                     | Other and unspecified congenital anomalies             | 0.327     |
| 183*       | 5.003                     | Malignant neoplasm of ovary and other uterine adnexa   | 0.301     |
| 158.8      | 6.217                     | Malignant neoplasm of retroperitoneum and peritoneum   | 0.301     |
| 368.5      | 1.000                     | Visual disturbances                                    | 0.279     |
| 208.9      | 1.000                     | Leukemia/lymphoma                                      | 0.279     |
| 334.3      | 1.000                     | Spinocerebellar disease                                | 0.276     |
| 333.4      | 1.000                     | Huntington's chorea                                    | 0.276     |
| 332        | 0.565                     | Parkinson's disease                                    | 0.276     |



**Supplementary Table S8.** Comprehensive EBV-human protein-protein interaction dataset, including the source of data. Sources: CCSB (data from Rozenblatt-Rosen, et al, provided herein for clarity), Calderwood *et al* [5], VirusMINT [6] and other.

| <b>Viral Protein</b> | <b>Host Protein</b> | <b>Source of interaction</b> |
|----------------------|---------------------|------------------------------|
| BALF1                | CEP76               | CCSB                         |
| BALF1                | FHL3                | CCSB                         |
| BALF2                | GOLGA2              | CCSB                         |
| BALF2                | NEFL                | CCSB                         |
| BALF2                | PNMA1               | CCSB                         |
| BALF2                | ZYX                 | CCSB                         |
| BBRF2                | C1orf50             | CCSB                         |
| BBRF2                | C6orf182            | CCSB                         |
| BBRF2                | CEP76               | CCSB                         |
| BBRF2                | COPB1               | CCSB                         |
| BBRF2                | DZIP3               | CCSB                         |
| BBRF2                | GOLGA2              | CCSB                         |
| BBRF2                | GSTA4               | CCSB                         |
| BBRF2                | MCM6                | CCSB                         |
| BBRF2                | MIPOL1              | CCSB                         |
| BBRF2                | NEFL                | CCSB                         |
| BBRF2                | OPTN                | CCSB                         |
| BBRF2                | PNMA1               | CCSB                         |
| BBRF2                | PTBP1               | CCSB                         |
| BBRF2                | RINT1               | CCSB                         |
| BBRF2                | TFCP2               | CCSB                         |
| BDLF2                | CEP76               | CCSB                         |
| BDLF3                | AGR2                | CCSB                         |
| BDLF3                | OGT                 | CCSB                         |
| BFLF2                | GOLGA2              | CCSB                         |
| BFLF2                | GPRASP2             | CCSB                         |
| BFLF2                | KIAA0774            | CCSB                         |
| BFLF2                | KIFC3               | CCSB                         |
| BFLF2                | LZTS2               | CCSB                         |
| BFLF2                | MDFI                | CCSB                         |
| BFLF2                | PDE4DIP             | CCSB                         |
| BFLF2                | PNMA1               | CCSB                         |
| BFLF2                | TFIP11              | CCSB                         |
| BFLF2                | TRAF1               | CCSB                         |
| BFLF2                | TRIM27              | CCSB                         |
| BFRF1                | CRTAC1              | CCSB                         |
| BFRF1                | ZBED1               | CCSB                         |
| BHRF1                | BIK                 | CCSB                         |
| BHRF1                | ERLIN1              | CCSB                         |

---

|             |          |      |
|-------------|----------|------|
| BHRF1       | EXOC5    | CCSB |
| BHRF1       | FATE1    | CCSB |
| BHRF1       | MARCO    | CCSB |
| BHRF1       | NAALADL2 | CCSB |
| BLRF2       | DVL2     | CCSB |
| BNLF2A      | CREB3    | CCSB |
| BNLF2A      | RAB3IP   | CCSB |
| BNLF2A      | UBE2I    | CCSB |
| BNLF2B      | CCNDBP1  | CCSB |
| BNLF2B      | SPAG5    | CCSB |
| BPLF1       | AP2B1    | CCSB |
| BSLF2;BMLF1 | BEND7    | CCSB |
| BSLF2;BMLF1 | COIL     | CCSB |
| BSLF2;BMLF1 | KHDRBS2  | CCSB |
| BSLF2;BMLF1 | PSME3    | CCSB |
| BSLF2;BMLF1 | RBMX     | CCSB |
| BSLF2;BMLF1 | RBMX1F   | CCSB |
| BSLF2;BMLF1 | RBPMS    | CCSB |
| BSLF2;BMLF1 | TFCP2    | CCSB |
| BSLF2;BMLF1 | UBE2I    | CCSB |
| BZLF2       | CREB3    | CCSB |
| DUT         | TAX1BP1  | CCSB |
| DUT         | UBE2I    | CCSB |
| EB1/BZLF1   | C1orf94  | CCSB |
| EB1/BZLF1   | HSFY1    | CCSB |
| EB1/BZLF1   | PEX5     | CCSB |
| EB1/BZLF1   | POGZ     | CCSB |
| EB1/BZLF1   | RBPMS    | CCSB |
| EB1/BZLF1   | TFG      | CCSB |
| EBNA1       | KPNA3    | CCSB |
| EBNA1       | KPNA6    | CCSB |
| EBNA1       | LNX1     | CCSB |
| EBNA1       | SRPK2    | CCSB |
| EBNA3       | RFX6     | CCSB |
| EBNA4       | BANP     | CCSB |
| EBNA4       | ESRRG    | CCSB |
| EBNA4       | GMCL1    | CCSB |
| EBNA4       | GOLGA2   | CCSB |
| EBNA4       | PSME3    | CCSB |
| EBNA4       | RBPMS    | CCSB |
| EBNA4       | RIMBP3   | CCSB |
| EBNA4       | TFCP2    | CCSB |
| EBNA4       | TRAF4    | CCSB |
| EBNA6       | MAGED1   | CCSB |

---

---

|        |           |                      |
|--------|-----------|----------------------|
| EBNA6  | RBPMS     | CCSB                 |
| EBNALP | CCDC67    | CCSB                 |
| EBNALP | ESRRG     | CCSB                 |
| EBNALP | MAGEA1    | CCSB                 |
| EBNALP | SCYL1     | CCSB                 |
| EBNALP | SP100     | CCSB                 |
| GB     | CCNDBP1   | CCSB                 |
| GB     | DVL2      | CCSB                 |
| GB     | ESRRG     | CCSB                 |
| GB     | GOLGA2    | CCSB                 |
| GB     | MID2      | CCSB                 |
| GB     | MKRN3     | CCSB                 |
| GB     | PNMA1     | CCSB                 |
| GB     | RIMBP3    | CCSB                 |
| GB     | TFIP11    | CCSB                 |
| GB     | TRIM27    | CCSB                 |
| GM     | CCDC33    | CCSB                 |
| GN     | CREB3     | CCSB                 |
| GN     | TMEM159   | CCSB                 |
| LF2    | JAKMIP2   | CCSB                 |
| LF2    | LNK1      | CCSB                 |
| LF2    | NDC80     | CCSB                 |
| LMP1   | UBQLN1    | CCSB                 |
| LMP2A  | LNK1      | CCSB                 |
| TK     | TFCP2     | CCSB                 |
| UNG    | GSTA4     | CCSB                 |
| BDLF1  | CCDC14    | CCSB Calderwood      |
| BDLF2  | PSMA3     | CCSB Calderwood      |
| BFRF1  | HOMER3    | CCSB Calderwood      |
| EBNA4  | PSMA3     | CCSB Calderwood      |
| GB     | LZTS2     | CCSB Calderwood      |
| EBNA3  | RBPJ      | CCSB ISBN:0521827140 |
| EBNA4  | RBPJ      | CCSB ISBN:0521827140 |
| BALF2  | ELF2      | Calderwood           |
| BALF2  | FBLN5     | Calderwood           |
| BARF1  | ACTN1     | Calderwood           |
| BARF1  | PKM2      | Calderwood           |
| BARF1  | SERTAD1   | Calderwood           |
| BARF1  | TMEM66    | Calderwood           |
| BBRF2  | ARHGEF10L | Calderwood           |
| BBRF2  | PICK1     | Calderwood           |
| BDLF1  | CTSC      | Calderwood           |
| BDLF1  | MAPK7     | Calderwood           |
| BDLF2  | APOL3     | Calderwood           |

---

---

|             |          |            |
|-------------|----------|------------|
| BDLF2       | LTBP4    | Calderwood |
| BDLF2       | PSME3    | Calderwood |
| BDLF2       | TES      | Calderwood |
| BDLF3       | HOMER3   | Calderwood |
| BDLF3.5     | SERTAD1  | Calderwood |
| BDLF4       | MFSD1    | Calderwood |
| BDLF4       | PIGS     | Calderwood |
| BFLF2       | ACTN1    | Calderwood |
| BFLF2       | BAT3     | Calderwood |
| BFLF2       | CASKIN2  | Calderwood |
| BFLF2       | DKK3     | Calderwood |
| BFLF2       | EFEMP1   | Calderwood |
| BFLF2       | EFEMP2   | Calderwood |
| BFLF2       | EGFL7    | Calderwood |
| BFLF2       | FBLN2    | Calderwood |
| BFLF2       | FBLN5    | Calderwood |
| BFLF2       | GRN      | Calderwood |
| BFLF2       | HOMER3   | Calderwood |
| BFLF2       | LAMB2    | Calderwood |
| BFLF2       | LTBP4    | Calderwood |
| BFLF2       | MARCO    | Calderwood |
| BFLF2       | NUCB1    | Calderwood |
| BFLF2       | PLSCR1   | Calderwood |
| BFLF2       | RPMS     | Calderwood |
| BFLF2       | TRAF3IP3 | Calderwood |
| BFLF2       | TSNARE1  | Calderwood |
| BFLF2       | TXNDC11  | Calderwood |
| BFLF2       | UBE2I    | Calderwood |
| BFRF1       | GRN      | Calderwood |
| BFRF1       | PRMT1    | Calderwood |
| BFRF1       | SLIT3    | Calderwood |
| BFRF1       | VWF      | Calderwood |
| BGLF2       | HOMER3   | Calderwood |
| BGLF2       | OPTN     | Calderwood |
| BGLF2       | RBCK1    | Calderwood |
| BGLF2       | SHROOM3  | Calderwood |
| BGLF2       | TUBA1A   | Calderwood |
| BGLF4       | IQGAP2   | Calderwood |
| BGRF1/BDRF1 | ENOX2    | Calderwood |
| BGRF1/BDRF1 | GPRASP1  | Calderwood |
| BGRF1/BDRF1 | GPRASP2  | Calderwood |
| BGRF1/BDRF1 | TSC22D4  | Calderwood |
| BHRF1       | ACTN1    | Calderwood |
| BHRF1       | FN1      | Calderwood |

---

---

|        |         |            |
|--------|---------|------------|
| BHRF1  | GRN     | Calderwood |
| BHRF1  | LTBP4   | Calderwood |
| BHRF1  | TNXB    | Calderwood |
| BHRF1  | TRAF1   | Calderwood |
| BHRF1  | VWF     | Calderwood |
| BILF1  | GRN     | Calderwood |
| BILF1  | HOMER3  | Calderwood |
| BILF1  | LMNB1   | Calderwood |
| BILF1  | SLIT2   | Calderwood |
| BILF1  | VWF     | Calderwood |
| BLLF1  | HOMER3  | Calderwood |
| BLLF2  | GRN     | Calderwood |
| BNLF2B | GRN     | Calderwood |
| BOLF1  | PSMA3   | Calderwood |
| BOLF1  | SERTAD1 | Calderwood |
| BPLF1  | CCHCR1  | Calderwood |
| BPLF1  | CD74    | Calderwood |
| BPLF1  | CIR     | Calderwood |
| BPLF1  | CLK1    | Calderwood |
| BPLF1  | GAPDH   | Calderwood |
| BPLF1  | GRN     | Calderwood |
| BPLF1  | HBB     | Calderwood |
| BPLF1  | HLA-A   | Calderwood |
| BPLF1  | HLA-B   | Calderwood |
| BPLF1  | IGLL1   | Calderwood |
| BPLF1  | LASS4   | Calderwood |
| BPLF1  | NUCB2   | Calderwood |
| BPLF1  | RPL3    | Calderwood |
| BRRF1  | EFEMP1  | Calderwood |
| BRRF1  | FBLN5   | Calderwood |
| BRRF1  | LZTS2   | Calderwood |
| BRRF1  | NTN4    | Calderwood |
| BRRF1  | PARP4   | Calderwood |
| BRRF1  | PHYHD1  | Calderwood |
| BRRF1  | PLSCR1  | Calderwood |
| BRRF1  | SEPP1   | Calderwood |
| BRRF1  | SH3GLB1 | Calderwood |
| BRRF1  | SNX4    | Calderwood |
| BRRF1  | TRAF2   | Calderwood |
| BSLF1  | NFKB1   | Calderwood |
| BTRF1  | PPP1CA  | Calderwood |
| BVRF1  | ACTN1   | Calderwood |
| BVRF1  | EFEMP1  | Calderwood |
| BVRF1  | EFEMP2  | Calderwood |

---

---

|           |         |            |
|-----------|---------|------------|
| BVRF1     | IMMT    | Calderwood |
| BVRF1     | MMRN2   | Calderwood |
| BVRF1     | NCKIPSD | Calderwood |
| BVRF1     | PKM2    | Calderwood |
| BVRF1     | PSMA3   | Calderwood |
| BVRF1     | PSME3   | Calderwood |
| BVRF1     | RNF31   | Calderwood |
| BVRF1     | TSG101  | Calderwood |
| BXRF1     | FBLN5   | Calderwood |
| BZLF2     | GRN     | Calderwood |
| EB1/BZLF1 | ENOX2   | Calderwood |
| EB1/BZLF1 | GPRASP1 | Calderwood |
| EBNA1     | MDFI    | Calderwood |
| EBNA1     | PICK1   | Calderwood |
| EBNA1     | TSG101  | Calderwood |
| EBNA2     | AES     | Calderwood |
| EBNA2     | BLNK    | Calderwood |
| EBNA2     | CBX3    | Calderwood |
| EBNA2     | CD46    | Calderwood |
| EBNA2     | CD5L    | Calderwood |
| EBNA2     | DYNLL1  | Calderwood |
| EBNA2     | EFEMP2  | Calderwood |
| EBNA2     | FBLN5   | Calderwood |
| EBNA2     | FCHSD1  | Calderwood |
| EBNA2     | GCA     | Calderwood |
| EBNA2     | KRT36   | Calderwood |
| EBNA2     | PSMA3   | Calderwood |
| EBNA2     | RBP1    | Calderwood |
| EBNA2     | RCBTB1  | Calderwood |
| EBNA2     | SH3GLB1 | Calderwood |
| EBNA2     | SRI     | Calderwood |
| EBNA3     | NR4A1   | Calderwood |
| EBNA3     | RPL4    | Calderwood |
| EBNA4     | ACTN1   | Calderwood |
| EBNA4     | ACTN4   | Calderwood |
| EBNA4     | SH3GLB1 | Calderwood |
| EBNA4     | ZYX     | Calderwood |
| EBNA6     | FBLN5   | Calderwood |
| EBNA6     | PSMA3   | Calderwood |
| EBNA6     | SEPP1   | Calderwood |
| EBNA6     | VWF     | Calderwood |
| EBNALP    | PSMA3   | Calderwood |
| GB        | AP2B1   | Calderwood |
| GB        | FAM168B | Calderwood |

---

---

|       |          |                                      |
|-------|----------|--------------------------------------|
| GB    | FBLN5    | Calderwood                           |
| GB    | FN1      | Calderwood                           |
| GB    | GPRASP1  | Calderwood                           |
| GB    | GRN      | Calderwood                           |
| GB    | LAMB1    | Calderwood                           |
| GB    | LTBP4    | Calderwood                           |
| GB    | PDE6G    | Calderwood                           |
| GB    | TRAF2    | Calderwood                           |
| GB    | UBXN11   | Calderwood                           |
| GB    | VIM      | Calderwood                           |
| GB    | VWF      | Calderwood                           |
| GL    | HOMER3   | Calderwood                           |
| GM    | HOMER3   | Calderwood                           |
| GM    | NUCB1    | Calderwood                           |
| GN    | HOMER3   | Calderwood                           |
| LMP1  | EGFL7    | Calderwood                           |
| LMP2  | LGALS3BP | Calderwood                           |
| LMP2A | LGALS3BP | Calderwood                           |
| SM    | MAPRE1   | Calderwood                           |
| SM    | SP100    | Calderwood                           |
| SM    | TRA2B    | Calderwood                           |
| TK    | ENOX2    | Calderwood                           |
| TK    | GPRASP1  | Calderwood                           |
| TK    | GPRASP2  | Calderwood                           |
| TK    | TSC22D4  | Calderwood                           |
| EBNA2 | ZMYND11  | Calderwood VirusMINT                 |
| EBNA1 | C1QBP    | Calderwood VirusMINT ISBN:0521827140 |
| EBNA1 | KPNA2    | Calderwood VirusMINT ISBN:0521827140 |
| EBNA1 | RPA1     | ISBN:0521827140                      |
| EBNA1 | TNPO1    | ISBN:0521827140                      |
| EBNA2 | DDX20    | ISBN:0521827140                      |
| EBNA2 | EP300    | ISBN:0521827140                      |
| EBNA2 | GTF2B    | ISBN:0521827140                      |
| EBNA2 | GTF2E1   | ISBN:0521827140                      |
| EBNA2 | GTF2E2   | ISBN:0521827140                      |
| EBNA2 | GTF2H4   | ISBN:0521827140                      |
| EBNA2 | MYB      | ISBN:0521827140                      |
| EBNA2 | SMARCB1  | ISBN:0521827140                      |
| EBNA2 | SND1     | ISBN:0521827140                      |
| EBNA2 | SPI1     | ISBN:0521827140                      |
| EBNA2 | SPIB     | ISBN:0521827140                      |
| EBNA2 | TBP      | ISBN:0521827140                      |
| EBNA3 | AHR      | ISBN:0521827140                      |
| EBNA3 | AIP      | ISBN:0521827140                      |

---

---

|           |          |                               |
|-----------|----------|-------------------------------|
| EBNA3     | CCT5     | ISBN:0521827140               |
| EBNA3     | CTBP1    | ISBN:0521827140               |
| EBNA3     | UPRT     | ISBN:0521827140               |
| EBNA6     | DDX20    | ISBN:0521827140               |
| EBNA6     | NME1     | ISBN:0521827140               |
| EBNA6     | PTMA     | ISBN:0521827140               |
| EBNA6     | RBPJ     | ISBN:0521827140               |
| EBNA6     | SMN1     | ISBN:0521827140               |
| EBNALP    | CDKN2A   | ISBN:0521827140               |
| EBNALP    | P4HA1    | ISBN:0521827140               |
| LMP1      | TRAF1    | ISBN:0521827140               |
| LMP1      | TRAF2    | ISBN:0521827140               |
| LMP1      | TRAF3    | ISBN:0521827140               |
| LMP2A     | ITCH     | ISBN:0521827140               |
| LMP2A     | LCK      | ISBN:0521827140               |
| LMP2A     | LYN      | ISBN:0521827140               |
| LMP2A     | NEDD4    | ISBN:0521827140               |
| LMP2A     | SRC      | ISBN:0521827140               |
| LMP2A     | SYK      | ISBN:0521827140               |
| LMP2A     | ZAP70    | ISBN:0521827140               |
| EB1/BZLF1 | UBN1     | PMID:10725330                 |
| EBNA2     | NR4A1    | PMID:12195020                 |
| EB1/BZLF1 | TP53     | PMID:12438576 PMID:8114724    |
| EBNA2     | RBPJ     | PMID:18039120 ISBN:0521827140 |
| EB1/BZLF1 | RARA     | PMID:7784177                  |
| EB1/BZLF1 | RXRA     | PMID:7784177                  |
| EB1/BZLF1 | NFKB1    | PMID:8114725                  |
| EBNALP    | RB1      | PMID:8390666                  |
| EBNALP    | TP53     | PMID:8390666                  |
| EBNA1     | CSNK2A1  | VirusMINT                     |
| EBNA1     | CSNK2A2  | VirusMINT                     |
| EBNA1     | EBNA1BP2 | VirusMINT                     |
| EBNA1     | KPNA1    | VirusMINT                     |
| EBNA1     | NAP1L1   | VirusMINT                     |
| EBNA1     | ORC2L    | VirusMINT                     |
| EBNA1     | SFRS1    | VirusMINT                     |
| EBNA1     | TERF2    | VirusMINT                     |
| EBNA6     | CTBP1    | VirusMINT                     |
| EBNALP    | BAG2     | VirusMINT                     |
| EBNALP    | CAD      | VirusMINT                     |
| EBNALP    | CAPZA1   | VirusMINT                     |
| EBNALP    | CDC2     | VirusMINT                     |
| EBNALP    | CLPX     | VirusMINT                     |
| EBNALP    | CLTC     | VirusMINT                     |

---



---

|        |           |           |
|--------|-----------|-----------|
| EBNALP | CSE1L     | VirusMINT |
| EBNALP | DARS      | VirusMINT |
| EBNALP | DDX17     | VirusMINT |
| EBNALP | DDX5      | VirusMINT |
| EBNALP | DHX9      | VirusMINT |
| EBNALP | DNAJB1    | VirusMINT |
| EBNALP | DNAJB5    | VirusMINT |
| EBNALP | DNAJB6    | VirusMINT |
| EBNALP | EIF3B     | VirusMINT |
| EBNALP | EPRS      | VirusMINT |
| EBNALP | FLNC      | VirusMINT |
| EBNALP | GBAS      | VirusMINT |
| EBNALP | GCN1L1    | VirusMINT |
| EBNALP | GLUD1     | VirusMINT |
| EBNALP | GRPEL1    | VirusMINT |
| EBNALP | H1FX      | VirusMINT |
| EBNALP | HIST1H1D  | VirusMINT |
| EBNALP | HIST1H2BI | VirusMINT |
| EBNALP | HNRNPA0   | VirusMINT |
| EBNALP | HNRNPA1   | VirusMINT |
| EBNALP | HNRNPA2B1 | VirusMINT |
| EBNALP | HNRNPAB   | VirusMINT |
| EBNALP | HNRNPCL1  | VirusMINT |
| EBNALP | HNRNPD    | VirusMINT |
| EBNALP | HNRNPK    | VirusMINT |
| EBNALP | HNRNPM    | VirusMINT |
| EBNALP | HNRNPR    | VirusMINT |
| EBNALP | HNRNPU    | VirusMINT |
| EBNALP | HSPA1B    | VirusMINT |
| EBNALP | HSPA5     | VirusMINT |
| EBNALP | HSPA8     | VirusMINT |
| EBNALP | HSPB1     | VirusMINT |
| EBNALP | HSPD1     | VirusMINT |
| EBNALP | IARS      | VirusMINT |
| EBNALP | ILF3      | VirusMINT |
| EBNALP | IQGAP2    | VirusMINT |
| EBNALP | KHDRBS1   | VirusMINT |
| EBNALP | LDHB      | VirusMINT |
| EBNALP | LRPPRC    | VirusMINT |
| EBNALP | MAGED1    | VirusMINT |
| EBNALP | MLF2      | VirusMINT |
| EBNALP | NCL       | VirusMINT |
| EBNALP | NIPSNAP1  | VirusMINT |
| EBNALP | NONO      | VirusMINT |

---

---

|        |        |           |
|--------|--------|-----------|
| EBNALP | NUP93  | VirusMINT |
| EBNALP | P4HA2  | VirusMINT |
| EBNALP | PCBP2  | VirusMINT |
| EBNALP | PCCA   | VirusMINT |
| EBNALP | PCCB   | VirusMINT |
| EBNALP | PRPF8  | VirusMINT |
| EBNALP | PSMB6  | VirusMINT |
| EBNALP | PSMC2  | VirusMINT |
| EBNALP | PSMD2  | VirusMINT |
| EBNALP | PTBP1  | VirusMINT |
| EBNALP | QARS   | VirusMINT |
| EBNALP | RAD50  | VirusMINT |
| EBNALP | RCN1   | VirusMINT |
| EBNALP | RCN2   | VirusMINT |
| EBNALP | RFC3   | VirusMINT |
| EBNALP | RPL10  | VirusMINT |
| EBNALP | RPL12  | VirusMINT |
| EBNALP | RPL13  | VirusMINT |
| EBNALP | RPL17  | VirusMINT |
| EBNALP | RPL18  | VirusMINT |
| EBNALP | RPL22  | VirusMINT |
| EBNALP | RPL23  | VirusMINT |
| EBNALP | RPL31  | VirusMINT |
| EBNALP | RPL7   | VirusMINT |
| EBNALP | RPL7A  | VirusMINT |
| EBNALP | RPL8   | VirusMINT |
| EBNALP | RPS13  | VirusMINT |
| EBNALP | RPS16  | VirusMINT |
| EBNALP | RPS17  | VirusMINT |
| EBNALP | RPS18  | VirusMINT |
| EBNALP | RPS2   | VirusMINT |
| EBNALP | RPS23  | VirusMINT |
| EBNALP | RPS6   | VirusMINT |
| EBNALP | RPS8   | VirusMINT |
| EBNALP | RPS9   | VirusMINT |
| EBNALP | RSL1D1 | VirusMINT |
| EBNALP | RUVBL1 | VirusMINT |
| EBNALP | RUVBL2 | VirusMINT |
| EBNALP | SEC13  | VirusMINT |
| EBNALP | SEC16A | VirusMINT |
| EBNALP | SERBP1 | VirusMINT |
| EBNALP | SET    | VirusMINT |
| EBNALP | SF3B1  | VirusMINT |
| EBNALP | SF3B2  | VirusMINT |

---

|        |          |                           |
|--------|----------|---------------------------|
| EBNALP | SFPQ     | VirusMINT                 |
| EBNALP | SFRS1    | VirusMINT                 |
| EBNALP | SLC25A6  | VirusMINT                 |
| EBNALP | SNRNP200 | VirusMINT                 |
| EBNALP | SNRPA    | VirusMINT                 |
| EBNALP | SNRPB2   | VirusMINT                 |
| EBNALP | SNRPD2   | VirusMINT                 |
| EBNALP | SSBP1    | VirusMINT                 |
| EBNALP | SYNCRIP  | VirusMINT                 |
| EBNALP | TIMM50   | VirusMINT                 |
| EBNALP | TNNT3    | VirusMINT                 |
| EBNALP | TUBA1B   | VirusMINT                 |
| EBNALP | TUBB     | VirusMINT                 |
| EBNALP | UBC      | VirusMINT                 |
| EBNALP | UBR5     | VirusMINT                 |
| EBNALP | WDR77    | VirusMINT                 |
| EBNALP | XPOT     | VirusMINT                 |
| EBNALP | XRCC5    | VirusMINT                 |
| LMP1   | RABAC1   | VirusMINT                 |
| EBNA1  | USP7     | VirusMINT ISBN:0521827140 |
| EBNALP | AKAP8L   | VirusMINT ISBN:0521827140 |
| EBNALP | HAX1     | VirusMINT ISBN:0521827140 |
| EBNALP | RPS3A    | VirusMINT ISBN:0521827140 |
| LMP1   | TRADD    | VirusMINT ISBN:0521827140 |
| LMP1   | ZMYND11  | VirusMINT ISBN:0521827140 |

**Supplementary Table S9.** Comprehensive HPV-human protein-protein interaction dataset, including the source of data. Sources: HPV16-human interactions. Sources: CCSB (data from Rozenblatt-Rosen, et al, provided herein for clarity), Huh *et al* [7], and VirusMINT [6].

| <b>Viral Protein</b> | <b>Host Protein</b> | <b>Source of interaction</b> |
|----------------------|---------------------|------------------------------|
| E6_HP16              | C9orf97             | CCSB                         |
| E6_HP16              | QARS                | CCSB                         |
| E6_HP16              | SIPA1L2             | CCSB                         |
| E6_HP16              | ZNF417              | CCSB                         |
| E7_HP16              | ATP5O               | CCSB                         |
| E7_HP16              | BEND7               | CCSB                         |
| E7_HP16              | BYSL                | CCSB                         |
| E7_HP16              | C5orf55             | CCSB                         |

---

|         |         |                   |
|---------|---------|-------------------|
| E7_HP16 | CCDC94  | CCSB              |
| E7_HP16 | CLK2    | CCSB              |
| E7_HP16 | FAM164C | CCSB              |
| E7_HP16 | FAM90A1 | CCSB              |
| E7_HP16 | FARS2   | CCSB              |
| E7_HP16 | FUBP3   | CCSB              |
| E7_HP16 | INO80B  | CCSB              |
| E7_HP16 | LGALS14 | CCSB              |
| E7_HP16 | LMO2    | CCSB              |
| E7_HP16 | LMO4    | CCSB              |
| E7_HP16 | PARD6B  | CCSB              |
| E7_HP16 | PIN4    | CCSB              |
| E7_HP16 | POLR1C  | CCSB              |
| E7_HP16 | PRKAA2  | CCSB              |
| E7_HP16 | RBX1    | CCSB              |
| E7_HP16 | RPL9    | CCSB              |
| E7_HP16 | SCNM1   | CCSB              |
| E7_HP16 | SRP19   | CCSB              |
| E7_HP16 | SYT16   | CCSB              |
| E7_HP16 | TEAD4   | CCSB              |
| E7_HP16 | TXNDC5  | CCSB              |
| E7_HP16 | ZBTB25  | CCSB              |
| E7_HP16 | ZGPAT   | CCSB              |
| E7_HP16 | ZNF408  | CCSB              |
| E7_HP16 | ZNF417  | CCSB              |
| E7_HP16 | GATAD2B | CCSB   Huh et al. |
| E7_HP16 | AKAP8   | Huh et al.        |
| E7_HP16 | AKAP8L  | Huh et al.        |
| E7_HP16 | ALPL    | Huh et al.        |
| E7_HP16 | CAD     | Huh et al.        |
| E7_HP16 | CBX4    | Huh et al.        |
| E7_HP16 | CCT2    | Huh et al.        |
| E7_HP16 | CCT4    | Huh et al.        |
| E7_HP16 | CCT8    | Huh et al.        |
| E7_HP16 | COPA    | Huh et al.        |
| E7_HP16 | CTTN    | Huh et al.        |
| E7_HP16 | CUL2    | Huh et al.        |
| E7_HP16 | DDX17   | Huh et al.        |
| E7_HP16 | DNAJA1  | Huh et al.        |
| E7_HP16 | E2F5    | Huh et al.        |
| E7_HP16 | E2F6    | Huh et al.        |
| E7_HP16 | EIF3F   | Huh et al.        |
| E7_HP16 | EIF3I   | Huh et al.        |
| E7_HP16 | EIF4A1  | Huh et al.        |

---

---

|         |          |            |
|---------|----------|------------|
| E7_HP16 | EIF4B    | Huh et al. |
| E7_HP16 | FLNA     | Huh et al. |
| E7_HP16 | FUS      | Huh et al. |
| E7_HP16 | HNRNPC   | Huh et al. |
| E7_HP16 | HNRNPF   | Huh et al. |
| E7_HP16 | HNRNPH1  | Huh et al. |
| E7_HP16 | HNRNPK   | Huh et al. |
| E7_HP16 | HNRNPM   | Huh et al. |
| E7_HP16 | HSPA5    | Huh et al. |
| E7_HP16 | HSPA8    | Huh et al. |
| E7_HP16 | IQGAP1   | Huh et al. |
| E7_HP16 | KCMF1    | Huh et al. |
| E7_HP16 | KIAA1949 | Huh et al. |
| E7_HP16 | KIAA1967 | Huh et al. |
| E7_HP16 | L3MBTL2  | Huh et al. |
| E7_HP16 | MAP7     | Huh et al. |
| E7_HP16 | MATR3    | Huh et al. |
| E7_HP16 | MGA      | Huh et al. |
| E7_HP16 | MTA2     | Huh et al. |
| E7_HP16 | NCOA1    | Huh et al. |
| E7_HP16 | NFIL3    | Huh et al. |
| E7_HP16 | NUMA1    | Huh et al. |
| E7_HP16 | PCBP2    | Huh et al. |
| E7_HP16 | PCGF6    | Huh et al. |
| E7_HP16 | PFKL     | Huh et al. |
| E7_HP16 | PHC3     | Huh et al. |
| E7_HP16 | PHGDH    | Huh et al. |
| E7_HP16 | PLCB3    | Huh et al. |
| E7_HP16 | PPP1CA   | Huh et al. |
| E7_HP16 | PRMT5    | Huh et al. |
| E7_HP16 | PRPH     | Huh et al. |
| E7_HP16 | PYGM     | Huh et al. |
| E7_HP16 | RBBP7    | Huh et al. |
| E7_HP16 | RBMXL2   | Huh et al. |
| E7_HP16 | RCOR1    | Huh et al. |
| E7_HP16 | RFC2     | Huh et al. |
| E7_HP16 | RIF1     | Huh et al. |
| E7_HP16 | RING1    | Huh et al. |
| E7_HP16 | RNF2     | Huh et al. |
| E7_HP16 | RUVBL2   | Huh et al. |
| E7_HP16 | SAP130   | Huh et al. |
| E7_HP16 | SF3B1    | Huh et al. |
| E7_HP16 | SQSTM1   | Huh et al. |
| E7_HP16 | STK38    | Huh et al. |

---

---

|         |         |            |
|---------|---------|------------|
| E7_HP16 | TAF15   | Huh et al. |
| E7_HP16 | TARDBP  | Huh et al. |
| E7_HP16 | TBL1XR1 | Huh et al. |
| E7_HP16 | TBL1Y   | Huh et al. |
| E7_HP16 | TRIP13  | Huh et al. |
| E7_HP16 | TUBA1C  | Huh et al. |
| E7_HP16 | TUBA3C  | Huh et al. |
| E7_HP16 | TUBA4A  | Huh et al. |
| E7_HP16 | TUBB2A  | Huh et al. |
| E7_HP16 | UBR4    | Huh et al. |
| E7_HP16 | UBR5    | Huh et al. |
| E7_HP16 | VIM     | Huh et al. |
| E7_HP16 | WDR5    | Huh et al. |
| E7_HP16 | WDR77   | Huh et al. |
| E7_HP16 | ZER1    | Huh et al. |
| E1_HP16 | TRIP13  | VirusMINT  |
| E1_HP16 | UBE2I   | VirusMINT  |
| E2_HP16 | BRD4    | VirusMINT  |
| E2_HP16 | CEBPA   | VirusMINT  |
| E2_HP16 | CEBPB   | VirusMINT  |
| E2_HP16 | CITED1  | VirusMINT  |
| E2_HP16 | GTF2B   | VirusMINT  |
| E2_HP16 | KAT2B   | VirusMINT  |
| E2_HP16 | POMP    | VirusMINT  |
| E2_HP16 | SMN2    | VirusMINT  |
| E2_HP16 | TBP     | VirusMINT  |
| E2_HP16 | TOPBP1  | VirusMINT  |
| E2_HP16 | TP53    | VirusMINT  |
| E4_HP16 | SRPK1   | VirusMINT  |
| E5_HP16 | HLA-A   | VirusMINT  |
| E6_HP16 | BAK1    | VirusMINT  |
| E6_HP16 | BRCA1   | VirusMINT  |
| E6_HP16 | CREBBP  | VirusMINT  |
| E6_HP16 | DLG1    | VirusMINT  |
| E6_HP16 | EP300   | VirusMINT  |
| E6_HP16 | FADD    | VirusMINT  |
| E6_HP16 | FBLN1   | VirusMINT  |
| E6_HP16 | GPS2    | VirusMINT  |
| E6_HP16 | IRF3    | VirusMINT  |
| E6_HP16 | KPNA2   | VirusMINT  |
| E6_HP16 | KPNB1   | VirusMINT  |
| E6_HP16 | MAGI1   | VirusMINT  |
| E6_HP16 | MCM7    | VirusMINT  |
| E6_HP16 | MYC     | VirusMINT  |

---

---

|         |          |           |
|---------|----------|-----------|
| E6_HP16 | PTPN3    | VirusMINT |
| E6_HP16 | RCN2     | VirusMINT |
| E6_HP16 | SCRIB    | VirusMINT |
| E6_HP16 | SERTAD1  | VirusMINT |
| E6_HP16 | SIPA1L1  | VirusMINT |
| E6_HP16 | TAX1BP3  | VirusMINT |
| E6_HP16 | TNFRSF1A | VirusMINT |
| E6_HP16 | TNPO1    | VirusMINT |
| E6_HP16 | TP53     | VirusMINT |
| E6_HP16 | TP73     | VirusMINT |
| E6_HP16 | TSC2     | VirusMINT |
| E6_HP16 | UBE3A    | VirusMINT |
| E6_HP16 | XRCC1    | VirusMINT |
| E7_HP16 | BRCA1    | VirusMINT |
| E7_HP16 | CDKN1A   | VirusMINT |
| E7_HP16 | CHD4     | VirusMINT |
| E7_HP16 | CREBBP   | VirusMINT |
| E7_HP16 | DNAJA3   | VirusMINT |
| E7_HP16 | EP300    | VirusMINT |
| E7_HP16 | FOS      | VirusMINT |
| E7_HP16 | FOXM1    | VirusMINT |
| E7_HP16 | HDAC1    | VirusMINT |
| E7_HP16 | HDAC2    | VirusMINT |
| E7_HP16 | IRF1     | VirusMINT |
| E7_HP16 | JUN      | VirusMINT |
| E7_HP16 | JUNB     | VirusMINT |
| E7_HP16 | JUND     | VirusMINT |
| E7_HP16 | KAT2B    | VirusMINT |
| E7_HP16 | MYC      | VirusMINT |
| E7_HP16 | NOLC1    | VirusMINT |
| E7_HP16 | PKM2     | VirusMINT |
| E7_HP16 | POU5F1   | VirusMINT |
| E7_HP16 | PPP2CA   | VirusMINT |
| E7_HP16 | PPP2R1A  | VirusMINT |
| E7_HP16 | PSMC1    | VirusMINT |
| E7_HP16 | RAN      | VirusMINT |
| E7_HP16 | RPS25    | VirusMINT |
| E7_HP16 | SIVA1    | VirusMINT |
| E7_HP16 | SNW1     | VirusMINT |
| E7_HP16 | TBP      | VirusMINT |
| L1_HP16 | IPO5     | VirusMINT |
| L1_HP16 | KPNA2    | VirusMINT |
| L1_HP16 | KPNB1    | VirusMINT |
| L1_HP16 | TNPO1    | VirusMINT |

---

|         |            |                      |
|---------|------------|----------------------|
| L2_HP16 | GADD45G1P1 | VirusMINT            |
| L2_HP16 | IPO5       | VirusMINT            |
| L2_HP16 | KPNA2      | VirusMINT            |
| L2_HP16 | KPNB1      | VirusMINT            |
| L2_HP16 | MAN2B1     | VirusMINT            |
| L2_HP16 | PATZ1      | VirusMINT            |
| L2_HP16 | TINAGL1    | VirusMINT            |
| L2_HP16 | TNPO1      | VirusMINT            |
| E7_HP16 | CCNA2      | VirusMINT/Huh et al. |
| E7_HP16 | CCNE2      | VirusMINT/Huh et al. |
| E7_HP16 | CDC2       | VirusMINT/Huh et al. |
| E7_HP16 | CDK2       | VirusMINT/Huh et al. |
| E7_HP16 | RBL1       | VirusMINT/Huh et al. |
| E7_HP16 | TFDP1      | VirusMINT/Huh et al. |
| E7_HP16 | TFDP2      | VirusMINT/Huh et al. |
| E7_HP16 | E2F1       | VirusMINT Huh et al. |
| E7_HP16 | E2F2       | VirusMINT Huh et al. |
| E7_HP16 | E2F3       | VirusMINT Huh et al. |
| E7_HP16 | E2F4       | VirusMINT Huh et al. |
| E7_HP16 | RB1        | VirusMINT Huh et al. |
| E7_HP16 | RBL2       | VirusMINT Huh et al. |

**Supplementary Table S10.** List of genes that show significant expression change in **A**, Burkitt's lymphoma, **B**, B cell lymphoma, **C**, cervical cancer, and **D**, head and neck squamous cell carcinoma.

**A**

| Gene symbol | Ranking |
|-------------|---------|
| HES1        | -4.26%  |
| CD1D        | -2.50%  |
| TRIM22      | -2.24%  |
| ITGB2       | -1.25%  |
| PTK2        | -0.92%  |
| BIRC3       | -0.33%  |
| IL6         | -0.03%  |
| HSPB1       | 0.12%   |
| GADD45A     | 0.22%   |
| HBB         | 0.24%   |



|          |       |
|----------|-------|
| FOS      | 0.52% |
| VEGFA    | 0.93% |
| ACTA2    | 1.07% |
| PCNA     | 1.75% |
| PTTG1    | 1.96% |
| YWHAE    | 2.15% |
| SERPINA1 | 2.47% |
| MYC      | 2.48% |
| CDC2     | 2.76% |
| GMPS     | 3.33% |
| DHFR     | 3.47% |
| ISG15    | 4.25% |
| DDB2     | 4.27% |
| CHEK1    | 4.68% |
| DUSP1    | 4.96% |

## B

| Gene symbol | Ranking |
|-------------|---------|
| CASP1       | -2.23%  |
| TRIM22      | -1.78%  |
| ITGB2       | -1.06%  |
| CD1D        | -0.24%  |
| IL6         | -0.23%  |
| FOS         | 0.02%   |
| DUSP1       | 0.08%   |
| CAV1        | 0.13%   |
| ADA         | 0.60%   |
| GADD45A     | 0.81%   |
| ACTA2       | 1.54%   |
| ATF3        | 1.58%   |
| TNFRSF10B   | 2.09%   |
| PCNA        | 2.27%   |
| GMPS        | 2.33%   |
| HSPB1       | 2.34%   |
| TK1         | 3.13%   |
| CXCL10      | 3.57%   |
| TP63        | 3.70%   |
| DDB2        | 4.64%   |
| PLTP        | 4.68%   |

## C

| Gene symbol | Ranking |
|-------------|---------|
| SLPI        | -4.39%  |
| ISG15       | -3.96%  |
| MMP2        | -3.42%  |
| DKK1        | -1.63%  |
| IVL         | -1.24%  |
| IFITM1      | -1.20%  |
| KRT16       | -0.54%  |
| BCL2A1      | 0.33%   |
| MMP1        | 0.50%   |
| PSMB9       | 0.98%   |
| ATF3        | 1.05%   |
| ADA         | 1.40%   |
| CHEK1       | 1.68%   |
| ICAM1       | 1.80%   |
| WEE1        | 1.84%   |
| ODC1        | 2.41%   |
| IL8         | 2.45%   |
| TLR3        | 2.95%   |
| CDK4        | 3.18%   |
| NDRG1       | 3.29%   |
| DDB2        | 3.45%   |
| TGM1        | 3.96%   |
| FOSL1       | 4.05%   |
| DUSP1       | 4.50%   |
| DHFR        | 4.61%   |
| CYC1        | 4.87%   |

## D

| Gene symbol | Ranking |
|-------------|---------|
| FOSL1       | -4.85%  |
| ITGAX       | -4.84%  |
| IL6         | -4.20%  |
| FN1         | -4.13%  |
| TNFAIP6     | -2.07%  |
| IL1B        | -1.08%  |
| BCL2A1      | -1.02%  |
| DKK1        | -0.83%  |

|        |        |
|--------|--------|
| ODC1   | -0.81% |
| IL8    | -0.63% |
| MMP1   | -0.29% |
| SELE   | -0.19% |
| TLR3   | 0.38%  |
| DDB2   | 1.28%  |
| DHFR   | 1.38%  |
| CDC25A | 1.73%  |
| PCNA   | 1.75%  |
| PTTG1  | 2.10%  |
| CDC2   | 2.23%  |
| WEE1   | 2.36%  |
| PADI3  | 2.78%  |
| PSMB9  | 2.87%  |
| MSH2   | 3.47%  |
| S100A9 | 4.39%  |

**Supplementary Table S11.** Raw data for calculating relative risks of candidate diseases in each viral disease network (PT configuration) among female HPV patients.

| ICD-9<br>code of<br>disease | ICD-9 description                                      | Patients<br>with<br>disease<br>among<br>female<br>HPV<br>patients | Patients<br>with<br>disease<br>among<br>female<br>patients | RR    | LB   | UB     | RR<br>(%99<br>CI) |
|-----------------------------|--------------------------------------------------------|-------------------------------------------------------------------|------------------------------------------------------------|-------|------|--------|-------------------|
| 1905                        | Malignant neoplasm of eye, Retina                      | 1                                                                 | 35                                                         | 15.74 | 1.20 | 206.86 | 15.74             |
| 2814                        | Protein-deficiency anemia                              | 4                                                                 | 273                                                        | 8.07  | 2.23 | 29.26  | 8.07              |
| 1588                        | Malignant neoplasm of retroperitoneum and peritoneum   | 15                                                                | 1329                                                       | 6.22  | 3.20 | 12.09  | 6.22              |
| 183                         | Malignant neoplasm of ovary and other uterine adnexa   | 275                                                               | 30275                                                      | 5.00  | 4.28 | 5.84   | 5.00              |
| 171                         | Malignant neoplasm of connective and other soft tissue | 32                                                                | 4661                                                       | 3.78  | 2.40 | 5.96   | 3.78              |
| 284                         | Aplastic anemia (Fanconi anemia)                       | 330                                                               | 49062                                                      | 3.70  | 3.22 | 4.27   | 3.70              |
| 216                         | Benign neoplasm of skin                                | 32                                                                | 5480                                                       | 3.22  | 2.04 | 5.07   | 3.22              |
| 7011                        | Keratoderma                                            | 22                                                                | 3934                                                       | 3.08  | 1.78 | 5.33   | 3.08              |
| 2880                        | Diseases of white blood cells, Neutropenia             | 302                                                               | 60248                                                      | 2.76  | 2.38 | 3.20   | 2.76              |
| 188                         | Malignant neoplasm of bladder                          | 137                                                               | 27706                                                      | 2.72  | 2.19 | 3.39   | 2.72              |

|       |                                                                                   |      |         |      |      |       |      |
|-------|-----------------------------------------------------------------------------------|------|---------|------|------|-------|------|
| 170   | Malignant neoplasm of bone and articular cartilage                                | 13   | 2808    | 2.55 | 1.25 | 5.21  | 2.55 |
| 5698  | Other disorders of intestine                                                      | 232  | 57630   | 2.22 | 1.87 | 2.63  | 2.22 |
| 173   | Other malignant neoplasm of skin                                                  | 81   | 20316   | 2.20 | 1.65 | 2.92  | 2.20 |
| 7062  | Diseases of sebaceous glands, Sebaceous cyst                                      | 22   | 5884    | 2.06 | 1.19 | 3.57  | 2.06 |
| 2114  | Benign neoplasm of other parts of digestive system, Rectum and anal canal         | 24   | 7684    | 1.72 | 1.02 | 2.91  | 1.72 |
| 709   | Other disorders of skin and subcutaneous tissue                                   | 40   | 12947   | 1.70 | 1.13 | 2.56  | 1.70 |
| 2762  | Disorders of fluid, electrolyte, and acid-base balance, Acidosis                  | 245  | 82798   | 1.63 | 1.38 | 1.92  | 1.63 |
| 285   | Other and unspecified anemias                                                     | 3551 | 1243992 | 1.57 | 1.51 | 1.64  | 1.57 |
| 2738  | Disorders of plasma protein metabolism                                            | 95   | 33847   | 1.55 | 1.19 | 2.01  | 1.55 |
| 286   | Coagulation defects                                                               | 151  | 59988   | 1.39 | 1.12 | 1.71  | 1.39 |
| 278   | Overweight, obesity and other hyperalimentation                                   | 502  | 231282  | 1.20 | 1.07 | 1.34  | 1.20 |
| 3343  | Spinocerebellar disease, Other cerebellar ataxia                                  | 1    | 2575    | 0.21 | 0.02 | 2.81  | 1.00 |
| 193   | Malignant neoplasm of thyroid gland                                               | 5    | 6042    | 0.46 | 0.14 | 1.44  | 1.00 |
| 3334  | Other extrapyramidal disease and abnormal movement disorders, Huntington's chorea | 2    | 818     | 1.35 | 0.22 | 8.32  | 1.00 |
| 2592  | Other endocrine disorders, Carcinoid syndrome                                     | 2    | 504     | 2.19 | 0.35 | 13.51 | 1.00 |
| 1578  | Malignant neoplasm of pancreas                                                    | 2    | 2689    | 0.41 | 0.07 | 2.53  | 1.00 |
| 3627  | Hereditary retinal dystrophies                                                    | 2    | 1008    | 1.09 | 0.18 | 6.76  | 1.00 |
| 3352  | Anterior horn cell disease, Motor neuron disease                                  | 7    | 5076    | 0.76 | 0.29 | 2.01  | 1.00 |
| 36274 | Other retinal disorders, Pigmentary retinal dystrophy                             | 2    | 941     | 1.17 | 0.19 | 7.24  | 1.00 |
| 756   | Other congenital musculoskeletal anomalies                                        | 19   | 14299   | 0.73 | 0.41 | 1.32  | 1.00 |
| 43491 |                                                                                   | 33   | 26565   | 0.68 | 0.44 | 1.07  | 1.00 |
| 515   | Postinflammatory pulmonary fibrosis                                               | 182  | 106803  | 0.94 | 0.78 | 1.14  | 1.00 |
| 2518  | Other disorders of pancreatic internal secretion                                  | 15   | 7743    | 1.07 | 0.55 | 2.08  | 1.00 |
| 147   | Malignant neoplasm of nasopharynx                                                 | 2    | 672     | 1.64 | 0.27 | 10.13 | 1.00 |

|       |                                                                            |      |         |      |      |       |      |
|-------|----------------------------------------------------------------------------|------|---------|------|------|-------|------|
| 2115  | Benign neoplasm of liver and biliary passages                              | 3    | 2293    | 0.72 | 0.16 | 3.19  | 1.00 |
| 36216 | Other retinal disorders, Retinal neovascularization                        | 1    | 487     | 1.13 | 0.09 | 14.87 | 1.00 |
| 2725  | Lipoprotein deficiencies                                                   | 2    | 1906    | 0.58 | 0.09 | 3.57  | 1.00 |
| 5778  | Diseases of pancreas                                                       | 9    | 5912    | 0.84 | 0.36 | 1.98  | 1.00 |
| 176   | Kaposi's sarcoma                                                           | 1    | 358     | 1.54 | 0.12 | 20.22 | 1.00 |
| 295   | Schizophrenic disorders                                                    | 115  | 54759   | 1.16 | 0.91 | 1.47  | 1.00 |
| 2555  | Disorders of adrenal glands                                                | 3    | 756     | 2.19 | 0.49 | 9.67  | 1.00 |
| 281   | Other deficiency anemias                                                   | 226  | 110959  | 1.12 | 0.95 | 1.33  | 1.00 |
| 7425  | Other specified anomalies of spinal cord                                   | 1    | 966     | 0.57 | 0.04 | 7.50  | 1.00 |
| 555   | Regional enteritis                                                         | 36   | 16592   | 1.20 | 0.78 | 1.84  | 1.00 |
| 720   | Ankylosing spondylitis                                                     | 7    | 6453    | 0.60 | 0.23 | 1.58  | 1.00 |
| 6951  | Erythema multiforme                                                        | 6    | 3019    | 1.09 | 0.38 | 3.13  | 1.00 |
| 359   | Muscular dystrophies                                                       | 7    | 8105    | 0.48 | 0.18 | 1.26  | 1.00 |
| 5188  | Other diseases of lung                                                     | 523  | 308303  | 0.93 | 0.83 | 1.05  | 1.00 |
| 172   | Malignant melanoma of skin                                                 | 14   | 5427    | 1.42 | 0.71 | 2.83  | 1.00 |
| 2722  | Disorders of lipid metabolism, Mixed hyperlipidemia                        | 20   | 10873   | 1.01 | 0.57 | 1.80  | 1.00 |
| 3314  | Other cerebral degenerations, Obstructive hydrocephalus                    | 24   | 15999   | 0.83 | 0.49 | 1.40  | 1.00 |
| 2872  | Purpura and other hemorrhagic conditions                                   | 1    | 1082    | 0.51 | 0.04 | 6.69  | 1.00 |
| 151   | Malignant neoplasm of stomach                                              | 15   | 12184   | 0.68 | 0.35 | 1.32  | 1.00 |
| 3561  | Hereditary and idiopathic peripheral neuropathy, Peroneal muscular atrophy | 1    | 925     | 0.60 | 0.05 | 7.83  | 1.00 |
| 250   | Diabetes mellitus                                                          | 2243 | 1267230 | 0.97 | 0.92 | 1.03  | 1.00 |
| 2773  | Amyloidosis                                                                | 4    | 1765    | 1.25 | 0.34 | 4.53  | 1.00 |
| 9952  | Certain adverse effects not elsewhere classified                           | 95   | 64700   | 0.81 | 0.62 | 1.05  | 1.00 |
| 2794  | Autoimmune disease                                                         | 1    | 1088    | 0.51 | 0.04 | 6.65  | 1.00 |
| 205   | Myeloid leukemia                                                           | 15   | 6822    | 1.21 | 0.62 | 2.36  | 1.00 |
| 2113  | Benign neoplasm of other parts of digestive system, Colon                  | 179  | 95181   | 1.04 | 0.85 | 1.26  | 1.00 |
| 7819  | Symptoms involving nervous and musculoskeletal systems                     | 5    | 4739    | 0.58 | 0.18 | 1.84  | 1.00 |
| 2753  | Disorders of phosphorus metabolism                                         | 31   | 10916   | 1.56 | 0.98 | 2.48  | 1.00 |
| 191   | Malignant neoplasm of brain                                                | 9    | 6774    | 0.73 | 0.31 | 1.73  | 1.00 |
| 7090  | Other disorders of skin and subcutaneous tissue, Dyschromia                | 3    | 1341    | 1.23 | 0.28 | 5.45  | 1.00 |
| 2377  | Neurofibromatosis                                                          | 4    | 963     | 2.29 | 0.63 | 8.29  | 1.00 |

|       |                                                                                   |      |        |      |      |       |      |
|-------|-----------------------------------------------------------------------------------|------|--------|------|------|-------|------|
| 496   | Chronic airway obstruction                                                        | 1714 | 893108 | 1.06 | 0.99 | 1.12  | 1.00 |
| 162   | Malignant neoplasm of trachea, bronchus, and lung                                 | 157  | 83337  | 1.04 | 0.84 | 1.27  | 1.00 |
| 731   | Osteitis deformans and osteopathies associated with other disorders               | 17   | 15587  | 0.60 | 0.32 | 1.12  | 1.00 |
| 340   | Multiple sclerosis                                                                | 14   | 11692  | 0.66 | 0.33 | 1.31  | 1.00 |
| 2028  | Other malignant neoplasms of lymphoid and histiocytic tissue                      | 46   | 26534  | 0.95 | 0.65 | 1.40  | 1.00 |
| 345   | Epilepsy and recurrent seizures                                                   | 89   | 59545  | 0.82 | 0.63 | 1.08  | 1.00 |
| 2393  | Neoplasms of unspecified nature, Breast                                           | 2    | 1512   | 0.73 | 0.12 | 4.50  | 1.00 |
| 283   | Acquired hemolytic anemias                                                        | 29   | 11554  | 1.38 | 0.86 | 2.23  | 1.00 |
| 208   | Leukemia of unspecified cell type                                                 | 11   | 3809   | 1.59 | 0.73 | 3.46  | 1.00 |
| 7573  | Congenital anomalies of the integument                                            | 1    | 453    | 1.22 | 0.09 | 15.98 | 1.00 |
| 389   | Hearing loss                                                                      | 69   | 42907  | 0.89 | 0.65 | 1.21  | 1.00 |
| 7598  | Other and unspecified congenital anomalies                                        | 1    | 343    | 1.61 | 0.12 | 21.11 | 1.00 |
| 204   | Lymphoid leukemia                                                                 | 30   | 21405  | 0.77 | 0.48 | 1.24  | 1.00 |
| 260   | Kwashiorkor                                                                       | 21   | 6784   | 1.71 | 0.97 | 2.99  | 1.00 |
| 5718  | Chronic liver disease and cirrhosis                                               | 22   | 8948   | 1.35 | 0.78 | 2.35  | 1.00 |
| 2948  | Persistent mental disorders due to conditions classified elsewhere                | 12   | 10157  | 0.65 | 0.31 | 1.37  | 1.00 |
| 333   | Other extrapyramidal disease and abnormal movement disorders                      | 51   | 39712  | 0.71 | 0.49 | 1.01  | 1.00 |
| 710   | Diffuse diseases of connective tissue                                             | 53   | 37027  | 0.79 | 0.55 | 1.12  | 1.00 |
| 7578  | Congenital anomalies of the integument                                            | 0    |        | 1.00 |      |       | 1.00 |
| 75731 | Congenital anomalies of the integument                                            | 0    |        | 1.00 |      |       | 1.00 |
| 75567 | Other congenital anomalies of limbs, Anomalies of foot                            | 0    |        | 1.00 |      |       | 1.00 |
| 2572  | Testicular dysfunction                                                            | 0    |        | 1.00 |      |       | 1.00 |
| 2533  | Disorders of the pituitary gland and its hypothalamic control, Pituitary dwarfism | 0    |        | 1.00 |      |       | 1.00 |
| 185   | Malignant neoplasm of prostate                                                    | 0    |        | 1.00 |      |       | 1.00 |
| 99685 | Complications peculiar to certain specified procedures, Bone                      | 0    |        | 1.00 |      |       | 1.00 |

|       |                                                                                 |   |      |  |      |
|-------|---------------------------------------------------------------------------------|---|------|--|------|
|       | marrow                                                                          |   |      |  |      |
| 9747  | Poisoning by water, mineral, and uric acid metabolism drugs                     | 0 | 1.00 |  | 1.00 |
| 2534  | Disorders of the pituitary gland and its hypothalamic control                   | 0 | 1.00 |  | 1.00 |
| 2002  | Burkitt's lymphoma                                                              | 0 | 1.00 |  | 1.00 |
| 7467  | Other congenital anomalies of heart, Hypoplastic left heart syndrome            | 0 | 1.00 |  | 1.00 |
| 37446 | Other disorders of eyelids, Blepharophimosis                                    | 0 | 1.00 |  | 1.00 |
| 7554  | Other congenital anomalies of limbs, Reduction deformities, unspecified limb    | 0 | 1.00 |  | 1.00 |
| 7551  | Other congenital anomalies of limbs, Syndactyly                                 | 0 | 1.00 |  | 1.00 |
| 5204  | Disturbances of tooth formation                                                 | 0 | 1.00 |  | 1.00 |
| 27785 | Disorders of fatty acid oxidation                                               | 0 | 1.00 |  | 1.00 |
| 7595  | Other and unspecified congenital anomalies, Tuberous sclerosis                  | 0 | 1.00 |  | 1.00 |
| 6425  | Severe pre-eclampsia                                                            | 0 | 1.00 |  | 1.00 |
| 7571  | Congenital anomalies of the integument, Ichthyosis congenita                    | 0 | 1.00 |  | 1.00 |
| 75733 | Congenital anomalies of the integument, Congenital pigmentary anomalies of skin | 0 | 1.00 |  | 1.00 |
| 2840  | Aplastic anemia and other bone marrow failure syndromes,                        | 0 | 1.00 |  | 1.00 |
| 7575  | Congenital anomalies of the integument,                                         | 0 | 1.00 |  | 1.00 |
| 27731 | Familial Mediterranean fever                                                    | 0 | 1.00 |  | 1.00 |
| 194   | Malignant neoplasm of other endocrine glands                                    | 0 | 1.00 |  | 1.00 |
| 3783  | Strabismus and other disorders of binocular eye movements,                      | 0 | 1.00 |  | 1.00 |
| 99527 | Certain adverse effects not elsewhere classified, Other drug allergy            | 0 | 1.00 |  | 1.00 |

|       |                                                                        |     |        |      |      |      |      |
|-------|------------------------------------------------------------------------|-----|--------|------|------|------|------|
| 0846  | Malaria                                                                | 0   |        | 1.00 |      |      | 1.00 |
| 99591 | Certain adverse effects not elsewhere classified, Sepsis               | 0   |        | 1.00 |      |      | 1.00 |
| 7555  | Other congenital anomalies of limbs, Other anomalies of upper limb     | 0   |        | 1.00 |      |      | 1.00 |
| 2772  | Other disorders of purine and pyrimidine metabolism                    | 0   |        | 1.00 |      |      | 1.00 |
| 2792  | Combined immunity deficiency                                           | 0   |        | 1.00 |      |      | 1.00 |
| 7422  | Other congenital anomalies of nervous system,                          | 0   |        | 1.00 |      |      | 1.00 |
| 2726  | Disorders of lipid metabolism, Lipodystrophy                           | 0   |        | 1.00 |      |      | 1.00 |
| 2777  | Other and unspecified disorders of metabolism, Dysmetabolic syndrome X | 0   |        | 1.00 |      |      | 1.00 |
| 042   | Human immunodeficiency virus [HIV]                                     | 0   |        | 1.00 |      |      | 1.00 |
| 2718  | Disorders of carbohydrate transport and metabolism                     | 0   |        | 1.00 |      |      | 1.00 |
| 3685  | Visual disturbances, Color vision deficiencies                         | 0   |        | 1.00 |      |      | 1.00 |
| 36854 | Visual disturbances, Achromatopsia                                     | 0   |        | 1.00 |      |      | 1.00 |
| 440   | Atherosclerosis                                                        | 447 | 283986 | 0.87 | 0.77 | 0.98 | 0.87 |
| 714   | Rheumatoid arthritis and other inflammatory polyarthropathies          | 218 | 144625 | 0.83 | 0.70 | 0.99 | 0.83 |
| 733   | Other disorders of bone and cartilage                                  | 735 | 500591 | 0.81 | 0.74 | 0.89 | 0.81 |
| 493   | Asthma                                                                 | 443 | 308106 | 0.79 | 0.70 | 0.90 | 0.79 |
| 244   | Acquired hypothyroidism                                                | 795 | 577982 | 0.76 | 0.69 | 0.83 | 0.76 |
| 153   | Malignant neoplasm of colon                                            | 164 | 119862 | 0.75 | 0.62 | 0.92 | 0.75 |
| 4261  | Conduction disorders, Atrioventricular block, other and unspecified    | 204 | 150876 | 0.74 | 0.62 | 0.89 | 0.74 |
| 4254  | Cardiomyopathy                                                         | 202 | 151629 | 0.73 | 0.61 | 0.88 | 0.73 |
| 577   | Diseases of pancreas                                                   | 148 | 117189 | 0.70 | 0.56 | 0.86 | 0.70 |
| 331   | Other cerebral degenerations                                           | 266 | 217698 | 0.67 | 0.57 | 0.79 | 0.67 |
| 272   | Disorders of lipid metabolism                                          | 489 | 447192 | 0.60 | 0.54 | 0.68 | 0.60 |
| 271   | Disorders of carbohydrate transport and metabolism                     | 23  | 22084  | 0.57 | 0.34 | 0.98 | 0.57 |



|     |                             |     |        |      |      |      |      |
|-----|-----------------------------|-----|--------|------|------|------|------|
| 332 | Parkinson's disease         | 122 | 119034 | 0.56 | 0.45 | 0.71 | 0.56 |
| 410 | Acute myocardial infarction | 450 | 452653 | 0.55 | 0.48 | 0.62 | 0.55 |
| 346 | Migraine                    | 15  | 21183  | 0.39 | 0.20 | 0.76 | 0.39 |

**Supplementary Table S12.** Raw data for calculating relative risks of candidate diseases in each viral disease network (PT configuration) among male HPV patients.

| ICD-9<br>code of<br>disease | ICD-9 description                                                                                            | Patients<br>with<br>disease<br>among<br>male HPV<br>patients | Patients<br>with<br>disease<br>among<br>male<br>patients | RR    | LB   | UB      | RR<br>(%99<br>CI) |
|-----------------------------|--------------------------------------------------------------------------------------------------------------|--------------------------------------------------------------|----------------------------------------------------------|-------|------|---------|-------------------|
| 216                         | Benign neoplasm of skin                                                                                      | 18                                                           | 3673                                                     | 21.47 | 1.21 | 381.63  | 21.47             |
| 7062                        | Diseases of sebaceous glands, Sebaceous cyst                                                                 | 20                                                           | 5905                                                     | 14.84 | 1.50 | 146.83  | 14.84             |
| 173                         | Other malignant neoplasm of skin                                                                             | 41                                                           | 22670                                                    | 7.92  | 2.38 | 26.35   | 7.92              |
| 188                         | Malignant neoplasm of bladder                                                                                | 39                                                           | 82204                                                    | 2.08  | 1.01 | 4.29    | 2.08              |
| 5188                        | Other diseases of lung, Other diseases of lung                                                               | 91                                                           | 253255                                                   | 1.57  | 1.02 | 2.43    | 1.57              |
| 496                         | Chronic airway obstruction, not elsewhere classified                                                         | 304                                                          | 1025277                                                  | 1.30  | 1.04 | 1.62    | 1.30              |
| 3343                        | Spinocerebellar disease, Other cerebellar ataxia                                                             | 2                                                            | 2472                                                     | 1.00  | 0.07 | 172.11  | 1.00              |
| 577                         | Diseases of pancreas                                                                                         | 20                                                           | 74922                                                    | 1.00  | 0.50 | 2.73    | 1.00              |
| 3352                        | Anterior horn cell disease, Motor neuron disease                                                             | 2                                                            | 5345                                                     | 1.00  | 0.09 | 31.60   | 1.00              |
| 5778                        | Diseases of pancreas, Other specified diseases of pancreas                                                   | 2                                                            | 3804                                                     | 1.00  | 0.08 | 63.10   | 1.00              |
| 2518                        | Other disorders of pancreatic internal secretion, Other specified disorders of pancreatic internal secretion | 4                                                            | 5615                                                     | 1.00  | 0.23 | 42.63   | 1.00              |
| 332                         | Parkinson's disease                                                                                          | 35                                                           | 109084                                                   | 1.00  | 0.72 | 2.76    | 1.00              |
| 3561                        | Hereditary and idiopathic peripheral neuropathy, Peroneal muscular atrophy                                   | 1                                                            | 1076                                                     | 1.00  | 0.01 | 1345.84 | 1.00              |
| 271                         | Disorders of carbohydrate transport and metabolism                                                           | 4                                                            | 14184                                                    | 1.00  | 0.18 | 8.47    | 1.00              |
| 170                         | Malignant neoplasm of bone and articular cartilage                                                           | 2                                                            | 2466                                                     | 1.00  | 0.07 | 173.16  | 1.00              |

|       |                                                                                        |    |        |      |      |         |      |
|-------|----------------------------------------------------------------------------------------|----|--------|------|------|---------|------|
| 193   | Malignant neoplasm of thyroid gland                                                    | 3  | 2547   | 1.00 | 0.13 | 206.84  | 1.00 |
| 710   | Diffuse diseases of connective tissue                                                  | 1  | 9114   | 1.00 | 0.02 | 11.04   | 1.00 |
| 272   | Disorders of lipid metabolism                                                          | 53 | 258825 | 1.00 | 0.55 | 1.46    | 1.00 |
| 286   | Coagulation defects                                                                    | 24 | 54151  | 1.00 | 0.79 | 4.78    | 1.00 |
| 733   | Other disorders of bone and cartilage                                                  | 30 | 96640  | 1.00 | 0.66 | 2.80    | 1.00 |
| 331   | Other cerebral degenerations                                                           | 33 | 113963 | 1.00 | 0.65 | 2.49    | 1.00 |
| 5718  | Chronic liver disease and cirrhosis, Other chronic nonalcoholic liver disease          | 2  | 4333   | 1.00 | 0.09 | 47.96   | 1.00 |
| 333   | Other extrapyramidal disease and abnormal movement disorders                           | 11 | 21297  | 1.00 | 0.56 | 9.20    | 1.00 |
| 284   | Aplastic anemia and other bone marrow failure syndromes                                | 12 | 38203  | 1.00 | 0.44 | 4.33    | 1.00 |
| 515   | Postinflammatory pulmonary fibrosis                                                    | 25 | 87653  | 1.00 | 0.58 | 2.71    | 1.00 |
| 440   | Atherosclerosis                                                                        | 67 | 247886 | 1.00 | 0.74 | 1.89    | 1.00 |
| 756   | Other congenital musculoskeletal anomalies                                             | 1  | 5878   | 1.00 | 0.02 | 22.40   | 1.00 |
| 43491 |                                                                                        | 7  | 18064  | 1.00 | 0.34 | 8.40    | 1.00 |
| 7011  | Other hypertrophic and atrophic conditions of skin, Keratoderma, acquired              | 9  | 2832   | 1.00 | 0.50 | 383.83  | 1.00 |
| 281   | Other deficiency anemias                                                               | 19 | 60729  | 1.00 | 0.55 | 3.40    | 1.00 |
| 7425  | Other congenital anomalies of nervous system, Other specified anomalies of spinal cord | 1  | 950    | 1.00 | 0.01 | 2059.75 | 1.00 |
| 555   | Regional enteritis                                                                     | 6  | 9031   | 1.00 | 0.36 | 23.29   | 1.00 |
| 2753  | Disorders of mineral metabolism, Disorders of phosphorus metabolism                    | 1  | 8625   | 1.00 | 0.02 | 12.01   | 1.00 |
| 9952  | Certain adverse effects not elsewhere classified                                       | 11 | 30981  | 1.00 | 0.45 | 5.38    | 1.00 |
| 205   | Myeloid leukemia                                                                       | 1  | 7233   | 1.00 | 0.02 | 15.84   | 1.00 |
| 244   | Acquired hypothyroidism                                                                | 38 | 125031 | 1.00 | 0.70 | 2.52    | 1.00 |
| 720   | Ankylosing spondylitis and other inflammatory spondylopathies                          | 3  | 6124   | 1.00 | 0.15 | 30.01   | 1.00 |

|      |                                                                                                                      |     |        |      |      |        |      |
|------|----------------------------------------------------------------------------------------------------------------------|-----|--------|------|------|--------|------|
| 359  | Muscular dystrophies and other myopathies                                                                            | 2   | 5763   | 1.00 | 0.08 | 27.40  | 1.00 |
| 295  | Schizophrenic disorders                                                                                              | 9   | 20291  | 1.00 | 0.45 | 8.48   | 1.00 |
| 2738 | Disorders of plasma protein metabolism, Other disorders of plasma protein metabolism                                 | 6   | 19398  | 1.00 | 0.27 | 6.80   | 1.00 |
| 172  | Malignant melanoma of skin                                                                                           | 5   | 5610   | 1.00 | 0.30 | 50.06  | 1.00 |
| 2773 | Other and unspecified disorders of metabolism, Amyloidosis                                                           | 1   | 1662   | 1.00 | 0.02 | 358.12 | 1.00 |
| 3314 | Other cerebral degenerations, Obstructive hydrocephalus                                                              | 2   | 13314  | 1.00 | 0.06 | 6.87   | 1.00 |
| 171  | Malignant neoplasm of connective and other soft tissue                                                               | 2   | 4146   | 1.00 | 0.08 | 52.56  | 1.00 |
| 278  | Overweight, obesity and other hyperalimentation                                                                      | 17  | 86894  | 1.00 | 0.37 | 2.01   | 1.00 |
| 250  | Diabetes mellitus                                                                                                    | 259 | 910904 | 1.00 | 0.98 | 1.58   | 1.00 |
| 185  | Malignant neoplasm of prostate                                                                                       | 114 | 397870 | 1.00 | 0.87 | 1.80   | 1.00 |
| 2113 | Benign neoplasm of other parts of digestive system, Colon                                                            | 23  | 83746  | 1.00 | 0.54 | 2.67   | 1.00 |
| 7819 | Symptoms involving nervous and musculoskeletal systems, Other symptoms involving nervous and musculoskeletal systems | 2   | 3537   | 1.00 | 0.08 | 73.96  | 1.00 |
| 781  | Symptoms involving nervous and musculoskeletal systems                                                               | 7   | 64101  | 1.00 | 0.15 | 1.56   | 1.00 |
| 151  | Malignant neoplasm of stomach                                                                                        | 4   | 15965  | 1.00 | 0.17 | 7.09   | 1.00 |
| 2114 | Benign neoplasm of other parts of digestive system, Rectum and anal canal                                            | 4   | 6290   | 1.00 | 0.23 | 34.14  | 1.00 |
| 4254 | Cardiomyopathy, Other primary cardiomyopathies                                                                       | 54  | 160371 | 1.00 | 0.85 | 2.56   | 1.00 |
| 162  | Malignant neoplasm of trachea, bronchus, and lung                                                                    | 24  | 115617 | 1.00 | 0.44 | 1.88   | 1.00 |
| 2028 | Other malignant neoplasms of lymphoid and histiocytic tissue, Other lymphomas                                        | 7   | 21125  | 1.00 | 0.32 | 6.67   | 1.00 |
| 285  | Other and unspecified anemias                                                                                        | 219 | 800509 | 1.00 | 0.93 | 1.55   | 1.00 |
| 2880 | Diseases of white blood cells, Neutropenia                                                                           | 17  | 38607  | 1.00 | 0.66 | 5.62   | 1.00 |

|       |                                                                                                   |    |        |      |      |           |      |
|-------|---------------------------------------------------------------------------------------------------|----|--------|------|------|-----------|------|
| 389   | Hearing loss                                                                                      | 5  | 33353  | 1.00 | 0.15 | 2.89      | 1.00 |
| 731   | Osteitis deformans and<br>osteopathies associated with<br>other disorders classified<br>elsewhere | 3  | 14824  | 1.00 | 0.11 | 6.84      | 1.00 |
| 153   | Malignant neoplasm of colon                                                                       | 16 | 97242  | 1.00 | 0.31 | 1.68      | 1.00 |
| 204   | Lymphoid leukemia                                                                                 | 9  | 22077  | 1.00 | 0.43 | 7.49      | 1.00 |
| 042   | Human immunodeficiency virus<br>[HIV] disease                                                     | 3  | 831    | 1.00 | 0.04 | 7039.68   | 1.00 |
| 340   | Multiple sclerosis                                                                                | 4  | 4630   | 1.00 | 0.23 | 63.32     | 1.00 |
| 345   | Epilepsy and recurrent seizures                                                                   | 10 | 46076  | 1.00 | 0.30 | 2.97      | 1.00 |
| 714   | Rheumatoid arthritis and other<br>inflammatory<br>polyarthropathies                               | 11 | 47669  | 1.00 | 0.34 | 3.04      | 1.00 |
| 2948  | Persistent mental disorders<br>due to conditions classified<br>elsewhere                          | 1  | 6043   | 1.00 | 0.02 | 21.36     | 1.00 |
| 4261  | Conduction disorders,<br>Atrioventricular block, other<br>and unspecified                         | 32 | 159443 | 1.00 | 0.47 | 1.64      | 1.00 |
| 493   | Asthma                                                                                            | 43 | 154421 | 1.00 | 0.68 | 2.19      | 1.00 |
| 7573  | Congenital anomalies of the<br>integument, Other specified<br>anomalies of skin                   | 1  | 277    | 1.00 | 0.00 | 611507.37 | 1.00 |
| 208   | Leukemia of unspecified cell<br>type                                                              | 1  | 3820   | 1.00 | 0.03 | 49.96     | 1.00 |
| 5698  | Other disorders of intestine,<br>Other specified disorders of<br>intestine                        | 12 | 34468  | 1.00 | 0.47 | 4.97      | 1.00 |
| 709   | Other disorders of skin and<br>subcutaneous tissue                                                | 8  | 8256   | 1.00 | 0.53 | 34.17     | 1.00 |
| 191   | Malignant neoplasm of brain                                                                       | 1  | 5929   | 1.00 | 0.02 | 22.07     | 1.00 |
| 2762  | Disorders of fluid, electrolyte,<br>and acid-base balance, Acidosis                               | 20 | 59786  | 1.00 | 0.59 | 3.62      | 1.00 |
| 346   | Migraine                                                                                          | 2  | 6041   | 1.00 | 0.08 | 25.10     | 1.00 |
| 283   | Acquired hemolytic anemias                                                                        | 6  | 7041   | 1.00 | 0.38 | 36.78     | 1.00 |
| 37446 | Other disorders of eyelids,<br>Blepharophimosis                                                   | 0  |        | 1.00 |      |           | 1.00 |
| 5204  | Disorders of tooth<br>development and eruption,<br>Disturbances of tooth<br>formation             | 0  |        | 1.00 |      |           | 1.00 |

|       |                                                                                                                         |   |      |  |      |
|-------|-------------------------------------------------------------------------------------------------------------------------|---|------|--|------|
| 7578  | Congenital anomalies of the integument, Other specified anomalies of the integument                                     | 0 | 1.00 |  | 1.00 |
| 2002  | Lymphosarcoma and reticulosarcoma and other specified malignant tumors of lymphatic tissue, Burkitt's tumor or lymphoma | 0 | 1.00 |  | 1.00 |
| 2872  | Purpura and other hemorrhagic conditions, Other nonthrombocytopenic purpuras                                            | 0 | 1.00 |  | 1.00 |
| 2533  | Disorders of the pituitary gland and its hypothalamic control, Pituitary dwarfism                                       | 0 | 1.00 |  | 1.00 |
| 2377  | Neoplasm of uncertain behavior of endocrine glands and nervous system, Neurofibromatosis                                | 0 | 1.00 |  | 1.00 |
| 7467  | Other congenital anomalies of heart, Hypoplastic left heart syndrome                                                    | 0 | 1.00 |  | 1.00 |
| 7551  | Other congenital anomalies of limbs, Syndactyly                                                                         | 0 | 1.00 |  | 1.00 |
| 7598  | Other and unspecified congenital anomalies, Other specified anomalies                                                   | 0 | 1.00 |  | 1.00 |
| 2393  | Neoplasms of unspecified nature, Breast                                                                                 | 0 | 1.00 |  | 1.00 |
| 2722  | Disorders of lipid metabolism, Mixed hyperlipidemia                                                                     | 0 | 1.00 |  | 1.00 |
| 1588  | Malignant neoplasm of retroperitoneum and peritoneum, Specified parts of peritoneum                                     | 0 | 1.00 |  | 1.00 |
| 7595  | Other and unspecified congenital anomalies, Tuberous sclerosis                                                          | 0 | 1.00 |  | 1.00 |
| 99527 | Certain adverse effects not elsewhere classified, Other drug allergy                                                    | 0 | 1.00 |  | 1.00 |
| 1905  | Malignant neoplasm of eye, Retina                                                                                       | 0 | 1.00 |  | 1.00 |

|       |                                 |      |      |
|-------|---------------------------------|------|------|
| 6951  | Erythematous conditions, 0      | 1.00 | 1.00 |
|       | Erythema multiforme             |      |      |
| 75731 | Congenital anomalies of the 0   | 1.00 | 1.00 |
|       | integument, Congenital          |      |      |
|       | ectodermal dysplasia            |      |      |
| 75567 | Other congenital anomalies of 0 | 1.00 | 1.00 |
|       | limbs, Anomalies of foot, NEC   |      |      |
| 7554  | Other congenital anomalies of 0 | 1.00 | 1.00 |
|       | limbs, Reduction deformities,   |      |      |
|       | unspecified limb                |      |      |
| 2794  | Disorders involving the 0       | 1.00 | 1.00 |
|       | immune mechanism,               |      |      |
|       | Autoimmune disease, not         |      |      |
|       | elsewhere classified            |      |      |
| 2555  | Disorders of adrenal glands, 0  | 1.00 | 1.00 |
|       | Other adrenal hypofunction      |      |      |
| 183   | Malignant neoplasm of ovary 0   | 1.00 | 1.00 |
|       | and other uterine adnexa        |      |      |
| 7555  | Other congenital anomalies of 0 | 1.00 | 1.00 |
|       | limbs, Other anomalies of       |      |      |
|       | upper limb, including shoulder  |      |      |
|       | girdle                          |      |      |
| 176   | Kaposi's sarcoma 0              | 1.00 | 1.00 |
|       |                                 |      |      |
| 2840  | Aplastic anemia and other 0     | 1.00 | 1.00 |
|       | bone marrow failure             |      |      |
|       | syndromes, Constitutional       |      |      |
|       | aplastic anemia                 |      |      |
| 7571  | Congenital anomalies of the 0   | 1.00 | 1.00 |
|       | integument, Ichthyosis          |      |      |
|       | congenita                       |      |      |
| 36274 | Other retinal disorders, 0      | 1.00 | 1.00 |
|       | Pigmentary retinal dystrophy    |      |      |
| 7575  | Congenital anomalies of the 0   | 1.00 | 1.00 |
|       | integument, Specified           |      |      |
|       | anomalies of nails              |      |      |
| 3627  | Other retinal disorders, 0      | 1.00 | 1.00 |
|       | Hereditary retinal dystrophies  |      |      |
| 2792  | Disorders involving the 0       | 1.00 | 1.00 |
|       | immune mechanism,               |      |      |
|       | Combined immunity deficiency    |      |      |
| 147   | Malignant neoplasm of 0         | 1.00 | 1.00 |
|       | nasopharynx                     |      |      |

|       |                                                                                                   |   |      |  |      |
|-------|---------------------------------------------------------------------------------------------------|---|------|--|------|
| 36216 | Other retinal disorders, Retinal neovascularization NOS                                           | 0 | 1.00 |  | 1.00 |
| 2725  | Disorders of lipid metabolism, Lipoprotein deficiencies                                           | 0 | 1.00 |  | 1.00 |
| 99685 | Complications peculiar to certain specified procedures, Bone marrow                               | 0 | 1.00 |  | 1.00 |
| 6425  | Hypertension complicating pregnancy, childbirth, and the puerperium, Severe pre-eclampsia         | 0 | 1.00 |  | 1.00 |
| 2814  | Other deficiency anemias, Protein-deficiency anemia                                               | 0 | 1.00 |  | 1.00 |
| 7422  | Other congenital anomalies of nervous system, Reduction deformities of brain                      | 0 | 1.00 |  | 1.00 |
| 27785 | Other and unspecified disorders of metabolism, Disorders of fatty acid oxidation                  | 0 | 1.00 |  | 1.00 |
| 3783  | Strabismus and other disorders of binocular eye movements, Other and unspecified heterotropia     | 0 | 1.00 |  | 1.00 |
| 0846  | Malaria, Malaria, unspecified                                                                     | 0 | 1.00 |  | 1.00 |
| 260   | Kwashiorkor                                                                                       | 0 | 1.00 |  | 1.00 |
| 2534  | Disorders of the pituitary gland and its hypothalamic control, Other anterior pituitary disorders | 0 | 1.00 |  | 1.00 |
| 36854 | Visual disturbances, Achromatopsia                                                                | 0 | 1.00 |  | 1.00 |
| 3685  | Visual disturbances, Color vision deficiencies                                                    | 0 | 1.00 |  | 1.00 |
| 9747  | Poisoning by water, mineral, and uric acid metabolism drugs, Uric acid metabolism drugs           | 0 | 1.00 |  | 1.00 |
| 2718  | Disorders of carbohydrate transport and metabolism, Other specified disorders of                  | 0 | 1.00 |  | 1.00 |

|       |                                                                                                    |    |        |      |      |      |      |
|-------|----------------------------------------------------------------------------------------------------|----|--------|------|------|------|------|
|       | carbohydrate transport and metabolism                                                              |    |        |      |      |      |      |
| 2726  | Disorders of lipid metabolism, Lipodystrophy                                                       | 0  |        | 1.00 |      |      | 1.00 |
| 2772  | Other and unspecified disorders of metabolism, Other disorders of purine and pyrimidine metabolism | 0  |        | 1.00 |      |      | 1.00 |
| 7090  | Other disorders of skin and subcutaneous tissue, Dyschromia                                        | 0  |        | 1.00 |      |      | 1.00 |
| 2777  | Other and unspecified disorders of metabolism, Dysmetabolic syndrome X                             | 0  |        | 1.00 |      |      | 1.00 |
| 99591 | Certain adverse effects not elsewhere classified, Sepsis                                           | 0  |        | 1.00 |      |      | 1.00 |
| 1578  | Malignant neoplasm of pancreas, Other specified sites of pancreas                                  | 0  |        | 1.00 |      |      | 1.00 |
| 194   | Malignant neoplasm of other endocrine glands and related structures                                | 0  |        | 1.00 |      |      | 1.00 |
| 2115  | Benign neoplasm of other parts of digestive system, Liver and biliary passages                     | 0  |        | 1.00 |      |      | 1.00 |
| 2572  | Testicular dysfunction, Other testicular hypofunction                                              | 0  |        | 1.00 |      |      | 1.00 |
| 3334  | Other extrapyramidal disease and abnormal movement disorders, Huntington's chorea                  | 0  |        | 1.00 |      |      | 1.00 |
| 27731 | Other and unspecified disorders of metabolism, Familial Mediterranean fever                        | 0  |        | 1.00 |      |      | 1.00 |
| 2592  | Other endocrine disorders, Carcinoid syndrome                                                      | 0  |        | 1.00 |      |      | 1.00 |
| 75733 | Congenital anomalies of the integument, Congenital pigmentary anomalies of skin                    | 0  |        | 1.00 |      |      | 1.00 |
| 410   | Acute myocardial infarction                                                                        | 69 | 490175 | 0.62 | 0.42 | 0.91 | 0.62 |



**Supplementary Table S13.** Raw data for calculating relative risks of candidate diseases in each viral disease network (PT configuration) among EBV patients.

| ICD-9<br>code of<br>disease | ICD-9 description                                                                       | Patients<br>with<br>disease<br>among<br>EBV<br>patients | Patients<br>with<br>disease<br>among<br>ALL<br>patients | RR     | LB     | UB     | RR<br>(%99<br>CI) |
|-----------------------------|-----------------------------------------------------------------------------------------|---------------------------------------------------------|---------------------------------------------------------|--------|--------|--------|-------------------|
| 147                         | Malignant neoplasm of nasopharynx                                                       | 1463                                                    | 1463                                                    | 522.10 | 488.10 | 558.48 | 522.10            |
| 2002                        | Burkitt's tumor or lymphoma                                                             | 217                                                     | 217                                                     | 522.10 | 438.34 | 621.87 | 522.10            |
| 2078                        | Other specified leukemia, Other specified leukemia                                      | 52                                                      | 202                                                     | 134.40 | 94.03  | 192.11 | 134.40            |
| 2028                        | Other malignant neoplasms of lymphoid and histiocytic tissue                            | 10883                                                   | 47659                                                   | 119.22 | 116.32 | 122.20 | 119.22            |
| 207                         | Other specified leukemia                                                                | 54                                                      | 580                                                     | 48.61  | 34.24  | 69.02  | 48.61             |
| 27900                       | Hypogammaglobulinemia                                                                   | 121                                                     | 2278                                                    | 27.73  | 21.94  | 35.05  | 27.73             |
| 204                         | Lymphoid leukemia                                                                       | 1803                                                    | 43482                                                   | 21.65  | 20.38  | 23.00  | 21.65             |
| 186                         | Malignant neoplasm of testis                                                            | 18                                                      | 440                                                     | 21.36  | 11.64  | 39.20  | 21.36             |
| 2840                        | Aplastic anemia and other bone marrow failure syndromes, Constitutional aplastic anemia | 11                                                      | 323                                                     | 17.78  | 8.18   | 38.66  | 17.78             |
| 208                         | Leukemia of unspecified cell                                                            | 213                                                     | 7629                                                    | 14.58  | 12.22  | 17.39  | 14.58             |
| 170                         | Malignant neoplasm of bone and articular cartilage                                      | 84                                                      | 5274                                                    | 8.32   | 6.28   | 11.01  | 8.32              |
| 2875                        | Purpura and other hemorrhagic conditions, Thrombocytopenia                              | 1800                                                    | 113055                                                  | 8.31   | 7.82   | 8.83   | 8.31              |
| 287                         | Purpura and other hemorrhagic conditions                                                | 2561                                                    | 161730                                                  | 8.27   | 7.86   | 8.70   | 8.27              |
| 2792                        | Combined immunity deficiency                                                            | 2                                                       | 143                                                     | 7.30   | 1.18   | 45.14  | 7.30              |
| 171                         | Malignant neoplasm of connective and other soft tissue                                  | 110                                                     | 8807                                                    | 6.52   | 5.10   | 8.34   | 6.52              |
| 176                         | Kaposi's sarcoma                                                                        | 9                                                       | 835                                                     | 5.63   | 2.38   | 13.28  | 5.63              |
| 7571                        | Congenital anomalies of the integument, Ichthyosis congenita                            | 5                                                       | 517                                                     | 5.05   | 1.60   | 15.98  | 5.05              |
| 2826                        | Hereditary hemolytic anemias, Sickle-cell disease                                       | 8                                                       | 910                                                     | 4.59   | 1.85   | 11.41  | 4.59              |

|      |                                                                                                             |     |       |      |      |       |      |
|------|-------------------------------------------------------------------------------------------------------------|-----|-------|------|------|-------|------|
| 191  | Malignant neoplasm of brain                                                                                 | 106 | 12703 | 4.36 | 3.39 | 5.60  | 4.36 |
| 260  | Kwashiorkor                                                                                                 | 85  | 10905 | 4.07 | 3.08 | 5.38  | 4.07 |
| 2381 | Neoplasm of uncertain behavior of other and unspecified sites and tissues, Connective and other soft tissue | 6   | 826   | 3.79 | 1.32 | 10.86 | 3.79 |
| 2554 | Disorders of adrenal glands, Corticoadrenal insufficiency                                                   | 128 | 19015 | 3.51 | 2.80 | 4.41  | 3.51 |
| 151  | Malignant neoplasm of stomach                                                                               | 186 | 28149 | 3.45 | 2.86 | 4.17  | 3.45 |
| 5234 | Gingival and periodontal diseases, Chronic periodontitis                                                    | 14  | 2186  | 3.34 | 1.68 | 6.66  | 3.34 |
| 6951 | Erythematous conditions, Erythema multiforme                                                                | 26  | 4475  | 3.03 | 1.83 | 5.03  | 3.03 |
| 203  | Multiple myeloma and immunoproliferative neoplasms                                                          | 162 | 28605 | 2.96 | 2.42 | 3.62  | 2.96 |
| 2871 | Purpura and other hemorrhagic conditions, Qualitative platelet defects                                      | 13  | 2317  | 2.93 | 1.43 | 5.98  | 2.93 |
| 173  | Other malignant neoplasm of skin                                                                            | 236 | 42986 | 2.87 | 2.42 | 3.39  | 2.87 |
| 161  | Malignant neoplasm of larynx                                                                                | 75  | 13760 | 2.85 | 2.11 | 3.83  | 2.85 |
| 193  | Malignant neoplasm of thyroid gland                                                                         | 46  | 8589  | 2.80 | 1.91 | 4.09  | 2.80 |
| 194  | Malignant neoplasm of other endocrine glands and related structures                                         | 9   | 1681  | 2.80 | 1.18 | 6.60  | 2.80 |
| 355  | Mononeuritis of lower limb                                                                                  | 172 | 34123 | 2.63 | 2.16 | 3.20  | 2.63 |
| 3561 | Hereditary and idiopathic peripheral neuropathy, Peroneal muscular atrophy                                  | 10  | 2001  | 2.61 | 1.16 | 5.89  | 2.61 |
| 2773 | Other and unspecified disorders of metabolism, Amyloidosis                                                  | 17  | 3427  | 2.59 | 1.39 | 4.84  | 2.59 |
| 5698 | Other disorders of intestine, Other specified disorders of intestine                                        | 448 | 92098 | 2.54 | 2.25 | 2.87  | 2.54 |
| 7090 | Other disorders of skin and subcutaneous tissue                                                             | 11  | 2272  | 2.53 | 1.16 | 5.50  | 2.53 |
| 172  | Malignant melanoma of skin                                                                                  | 47  | 11037 | 2.22 | 1.53 | 3.24  | 2.22 |

|       |                                                                                   |      |         |      |      |       |      |
|-------|-----------------------------------------------------------------------------------|------|---------|------|------|-------|------|
| 285   | Other and unspecified anemias                                                     | 8353 | 2044501 | 2.13 | 2.07 | 2.19  | 2.13 |
| 286   | Coagulation defects                                                               | 437  | 114139  | 2.00 | 1.77 | 2.26  | 2.00 |
| 216   | Benign neoplasm of skin                                                           | 34   | 9153    | 1.94 | 1.25 | 3.02  | 1.94 |
| 2824  | Hereditary hemolytic anemias, Thalassemias                                        | 35   | 9689    | 1.89 | 1.22 | 2.92  | 1.89 |
| 515   | Postinflammatory pulmonary fibrosis                                               | 644  | 194456  | 1.73 | 1.56 | 1.91  | 1.73 |
| 370   | Keratitis                                                                         | 34   | 10477   | 1.69 | 1.09 | 2.64  | 1.69 |
| 733   | Other disorders of bone and cartilage                                             | 1833 | 597231  | 1.60 | 1.51 | 1.70  | 1.60 |
| 4254  | Cardiomyopathy, Other primary cardiomyopathies                                    | 759  | 312000  | 1.27 | 1.16 | 1.39  | 1.27 |
| 244   | Acquired hypothyroidism                                                           | 1695 | 703013  | 1.26 | 1.18 | 1.34  | 1.26 |
| 2113  | Benign neoplasm of other parts of digestive system, Colon                         | 403  | 178927  | 1.18 | 1.03 | 1.34  | 1.18 |
| 162   | Malignant neoplasm of trachea, bronchus, and lung                                 | 437  | 198954  | 1.15 | 1.01 | 1.30  | 1.15 |
| 3334  | Other extrapyramidal disease and abnormal movement disorders, Huntington's chorea | 1    | 1331    | 0.39 | 0.03 | 5.16  | 1.00 |
| 28311 | Acquired hemolytic anemias, Hemolytic-uremic syndrome                             | 2    | 176     | 5.93 | 0.96 | 36.67 | 1.00 |
| 3343  | Spinocerebellar disease, Other cerebellar ataxia                                  | 12   | 5047    | 1.24 | 0.59 | 2.61  | 1.00 |
| 268   | Vitamin D deficiency                                                              | 5    | 1904    | 1.37 | 0.43 | 4.34  | 1.00 |
| 720   | Ankylosing spondylitis and other inflammatory spondylopathies                     | 25   | 12577   | 1.04 | 0.62 | 1.74  | 1.00 |
| 2897  | Other diseases of blood and blood-forming organs, Methemoglobinemia               | 1    | 160     | 3.26 | 0.25 | 42.89 | 1.00 |
| 3774  | Disorders of optic nerve and visual pathways, Other disorders of optic nerve      | 9    | 2678    | 1.75 | 0.74 | 4.14  | 1.00 |
| 743   | Congenital anomalies of eye                                                       | 2    | 783     | 1.33 | 0.22 | 8.24  | 1.00 |
| 366   | Cataract                                                                          | 185  | 100132  | 0.96 | 0.80 | 1.17  | 1.00 |
| 2827  | Hereditary hemolytic anemias, Other hemoglobinopathies                            | 1    | 609     | 0.86 | 0.07 | 11.27 | 1.00 |
| 744   | Congenital anomalies of ear, face, and neck                                       | 3    | 687     | 2.28 | 0.52 | 10.09 | 1.00 |

|      |                                                                                                                      |     |        |      |      |      |      |
|------|----------------------------------------------------------------------------------------------------------------------|-----|--------|------|------|------|------|
| 2114 | Benign neoplasm of other parts of digestive system, Rectum and anal canal                                            | 39  | 13974  | 1.46 | 0.96 | 2.20 | 1.00 |
| 2872 | Purpura and other hemorrhagic conditions, Other nonthrombocytopenic purpuras                                         | 7   | 1699   | 2.15 | 0.81 | 5.70 | 1.00 |
| 7596 | Other and unspecified congenital anomalies, Other hamartoses, NEC                                                    | 5   | 1498   | 1.74 | 0.55 | 5.51 | 1.00 |
| 1578 | Malignant neoplasm of pancreas, Other specified sites of pancreas                                                    | 11  | 4810   | 1.19 | 0.55 | 2.60 | 1.00 |
| 183  | Malignant neoplasm of ovary and other uterine adnexa                                                                 | 45  | 30302  | 0.78 | 0.53 | 1.14 | 1.00 |
| 2377 | Neoplasm of uncertain behavior of endocrine glands and nervous system, Neurofibromatosis                             | 7   | 1757   | 2.08 | 0.79 | 5.51 | 1.00 |
| 153  | Malignant neoplasm of colon                                                                                          | 426 | 217104 | 1.02 | 0.90 | 1.16 | 1.00 |
| 2115 | Benign neoplasm of other parts of digestive system, Liver and biliary passages                                       | 12  | 3487   | 1.80 | 0.85 | 3.78 | 1.00 |
| 4928 | Emphysema, Other emphysema                                                                                           | 723 | 356906 | 1.06 | 0.96 | 1.16 | 1.00 |
| 7062 | Diseases of sebaceous glands, Sebaceous cyst                                                                         | 29  | 11789  | 1.28 | 0.80 | 2.07 | 1.00 |
| 7819 | Symptoms involving nervous and musculoskeletal systems, Other symptoms involving nervous and musculoskeletal systems | 14  | 8276   | 0.88 | 0.44 | 1.76 | 1.00 |
| 555  | Regional enteritis                                                                                                   | 56  | 25623  | 1.14 | 0.81 | 1.61 | 1.00 |
| 3625 | Other retinal disorders, Degeneration of macula and posterior pole                                                   | 88  | 37575  | 1.22 | 0.93 | 1.61 | 1.00 |
| 2864 | Coagulation defects, von Willebrand's disease                                                                        | 7   | 1463   | 2.50 | 0.94 | 6.61 | 1.00 |
| 2393 | Neoplasms of unspecified nature, Breast                                                                              | 3   | 1540   | 1.02 | 0.23 | 4.50 | 1.00 |
| 365  | Glaucoma                                                                                                             | 430 | 233225 | 0.96 | 0.85 | 1.09 | 1.00 |
| 3627 | Other retinal disorders, Hereditary retinal dystrophies                                                              | 4   | 1691   | 1.24 | 0.34 | 4.48 | 1.00 |

|       |                                                                                                             |     |        |      |      |       |      |
|-------|-------------------------------------------------------------------------------------------------------------|-----|--------|------|------|-------|------|
| 75567 | Other congenital anomalies of limbs, Anomalies of foot, NEC                                                 | 1   | 157    | 3.33 | 0.25 | 43.71 | 1.00 |
| 7555  | Other congenital anomalies of limbs, Other anomalies of upper limb, including shoulder girdle               | 1   | 720    | 0.73 | 0.06 | 9.53  | 1.00 |
| 2725  | Disorders of lipoid metabolism, Lipoprotein deficiencies                                                    | 2   | 3133   | 0.33 | 0.05 | 2.06  | 1.00 |
| 2881  | Diseases of white blood cells, Functional disorders of polymorphonuclear neutrophils                        | 4   | 809    | 2.58 | 0.71 | 9.36  | 1.00 |
| 587   | Renal sclerosis, unspecified                                                                                | 9   | 3552   | 1.32 | 0.56 | 3.12  | 1.00 |
| 7598  | Other and unspecified congenital anomalies, Other specified anomalies                                       | 1   | 651    | 0.80 | 0.06 | 10.54 | 1.00 |
| 2721  | Disorders of lipoid metabolism, Pure hyperglyceridemia                                                      | 59  | 34104  | 0.90 | 0.65 | 1.26  | 1.00 |
| 3351  | Anterior horn cell disease, Spinal muscular atrophy                                                         | 2   | 252    | 4.14 | 0.67 | 25.61 | 1.00 |
| 2592  | Other endocrine disorders, Carcinoid syndrome                                                               | 1   | 862    | 0.61 | 0.05 | 7.96  | 1.00 |
| 3715  | Corneal opacity and other disorders of cornea, Hereditary corneal dystrophies                               | 8   | 4268   | 0.98 | 0.39 | 2.43  | 1.00 |
| 714   | Rheumatoid arthritis and other inflammatory polyarthropathies                                               | 415 | 192294 | 1.13 | 0.99 | 1.28  | 1.00 |
| 27785 | Other and unspecified disorders of metabolism, Disorders of fatty acid oxidation                            | 0   |        | 1.00 |      |       | 1.00 |
| 2772  | Other and unspecified disorders of metabolism, Other disorders of purine and pyrimidine metabolism          | 0   |        | 1.00 |      |       | 1.00 |
| 74344 | Congenital anomalies of eye, Specified anomalies of anterior chamber, chamber angle, and related structures | 0   |        | 1.00 |      |       | 1.00 |

|       |                                                                                                                        |   |      |  |      |
|-------|------------------------------------------------------------------------------------------------------------------------|---|------|--|------|
| 7431  | Congenital anomalies of eye, Microphthalmos                                                                            | 0 | 1.00 |  | 1.00 |
| 25513 | Disorders of adrenal glands, Bartter's syndrome                                                                        | 0 | 1.00 |  | 1.00 |
| 2886  | Diseases of white blood cells, Elevated white blood cell count                                                         | 0 | 1.00 |  | 1.00 |
| 7568  | Other congenital musculoskeletal anomalies, Other specified anomalies of muscle, tendon, fascia, and connective tissue | 0 | 1.00 |  | 1.00 |
| 2702  | Disorders of amino-acid transport and metabolism, Other disturbances of aromatic amino-acid metabolism                 | 0 | 1.00 |  | 1.00 |
| 75564 | Other congenital anomalies of limbs, Congenital deformity of knee (joint)                                              | 0 | 1.00 |  | 1.00 |
| 7554  | Other congenital anomalies of limbs, Reduction deformities, unspecified limb                                           | 0 | 1.00 |  | 1.00 |
| 27786 | Other and unspecified disorders of metabolism, Peroxisomal disorders                                                   | 0 | 1.00 |  | 1.00 |
| 7578  | Congenital anomalies of the integument, Other specified anomalies of the integument                                    | 0 | 1.00 |  | 1.00 |
| 2814  | Other deficiency anemias, Protein-deficiency anemia                                                                    | 0 | 1.00 |  | 1.00 |
| 75731 | Congenital anomalies of the integument, Congenital ectodermal dysplasia                                                | 0 | 1.00 |  | 1.00 |
| 37446 | Other disorders of eyelids, Blepharophimosis                                                                           | 0 | 1.00 |  | 1.00 |
| 75683 | Other congenital musculoskeletal anomalies, Ehlers-Danlos syndrome                                                     | 0 | 1.00 |  | 1.00 |
| 75733 | Congenital anomalies of the integument, Congenital pigmentary anomalies of skin                                        | 0 | 1.00 |  | 1.00 |

|       |                                                                               |      |         |      |      |      |      |
|-------|-------------------------------------------------------------------------------|------|---------|------|------|------|------|
| 7434  | Congenital anomalies of eye, Coloboma and other anomalies of anterior segment | 0    |         | 1.00 |      |      | 1.00 |
| 1905  | Malignant neoplasm of eye, Retina                                             | 0    |         | 1.00 |      |      | 1.00 |
| 99527 | Certain adverse effects not elsewhere classified, Other drug allergy          | 0    |         | 1.00 |      |      | 1.00 |
| 74345 | Congenital anomalies of eye, Aniridia                                         | 0    |         | 1.00 |      |      | 1.00 |
| 74357 | Congenital anomalies of eye, Specified anomalies of optic disc                | 0    |         | 1.00 |      |      | 1.00 |
| 2884  | Diseases of white blood cells, Hemophagocytic syndromes                       | 0    |         | 1.00 |      |      | 1.00 |
| 75833 | Chromosomal anomalies, Other microdeletions                                   | 0    |         | 1.00 |      |      | 1.00 |
| 250   | Diabetes mellitus                                                             | 3943 | 2178134 | 0.95 | 0.91 | 0.98 | 0.95 |
| 185   | Malignant neoplasm of prostate                                                | 679  | 397991  | 0.89 | 0.81 | 0.98 | 0.89 |
| 401   | Essential hypertension                                                        | 7673 | 4649322 | 0.86 | 0.84 | 0.89 | 0.86 |
| 188   | Malignant neoplasm of bladder                                                 | 170  | 109910  | 0.81 | 0.66 | 0.98 | 0.81 |
| 332   | Parkinson's disease                                                           | 303  | 228118  | 0.69 | 0.60 | 0.80 | 0.69 |
| 331   | Other cerebral degenerations                                                  | 311  | 331661  | 0.49 | 0.42 | 0.57 | 0.49 |

**Supplementary Table S14.** Genes in the network vicinity of the viral targets that differentially expressed in gene expression profiles of normal human diploid fibroblast (IMR90 data from Rozenblatt-Rosen, et al, provided herein for clarity) and primary human keratinocyte (Ker) populations with stable expression of HPV16 E6 or E7 oncoproteins.

| Differentially expressed gene | Cell type | ICD-9 code | Disease Name                                  |
|-------------------------------|-----------|------------|-----------------------------------------------|
| APP                           | E7 (Ker)  | 255.5      | Disorders of adrenal glands                   |
| APP                           | E7 (Ker)  | 277.39     | Other and unspecified disorders of metabolism |
| APP                           | E7 (Ker)  | 295.9      | Schizophrenic disorders                       |
| APP                           | E7 (Ker)  | 331        | Other cerebral degenerations                  |

|              |                                   |              |                                                         |
|--------------|-----------------------------------|--------------|---------------------------------------------------------|
| <b>BAX</b>   | E6 (IMR90) E6 (Ker)               | <b>153</b>   | <b>Malignant neoplasm of colon</b>                      |
| BAX          | E6 (IMR90) E6 (Ker)               | 204          | Lymphoid leukemia                                       |
| BCL2         | E7 (IMR90) E7 (Ker)               | 200          | B-cell lymphoma                                         |
| BRCA1        | E6 (IMR90) E7 (IMR90)<br>E7 (Ker) | 158.8        | Malignant neoplasm of retroperitoneum and<br>peritoneum |
| <b>BRCA1</b> | E6 (IMR90) E7 (IMR90)<br>E7 (Ker) | <b>183</b>   | <b>Malignant neoplasm of ovary</b>                      |
| <b>BRCA1</b> | E6 (IMR90) E7 (IMR90)<br>E7 (Ker) | <b>239.3</b> | <b>Neoplasms of unspecified nature, Breast</b>          |
| CASP1        | E6 (Ker)                          | -            |                                                         |
| CCL5         | E6 (IMR90)                        | 042          | Human immunodeficiency virus [HIV] disease              |
| <b>CD82</b>  | E6 (IMR90)                        | <b>185</b>   | <b>Malignant neoplasm of prostate</b>                   |
| CDC25A       | E6 (IMR90) E7 (IMR90)<br>E7 (Ker) | -            |                                                         |
| CDK4         | E6 (IMR90) E7 (IMR90)             | 172.9        | Malignant melanoma of skin                              |
| CDKN1B       | E6 (IMR90) E7 (Ker)               | -            |                                                         |
| CHEK1        | E6 (IMR90)                        | -            |                                                         |
| CYC1         | E7 (Ker)                          | -            |                                                         |
| DDB2         | E6 (IMR90)                        | 757.33       | Congenital anomalies of the integument                  |
| DUSP1        | E6 (IMR90)                        | -            |                                                         |
| E2F1         | E7 (Ker)                          | -            |                                                         |
| EDN1         | E7 (IMR90)                        | 286.9        | Coagulation defects                                     |
| EIF4E        | E7 (Ker)                          | -            |                                                         |
| ERBB2        | E7 (Ker)                          | 151.9        | Malignant neoplasm of stomach                           |
| <b>ERBB2</b> | E7 (Ker)                          | <b>183</b>   | <b>Malignant neoplasm of ovary</b>                      |
| ERBB2        | E7 (Ker)                          | 191.9        | Malignant neoplasm of brain                             |
| ERBB2        | E7 (Ker)                          | 272.2        | Disorders of lipid metabolism                           |
| FANCC        | E6 (IMR90)                        | 284.09       | Aplastic anemia (Fanconi Anemia)                        |
| <b>FN1</b>   | E7 (Ker)                          | <b>183</b>   | <b>Malignant neoplasm of ovary</b>                      |
| FN1          | E7 (Ker)                          | 208.9        | Leukemia of unspecified cell type                       |
| FN1          | E7 (Ker)                          | 569.89       | Other disorders of intestine, Other                     |
| FOSL1        | E7 (Ker)                          | -            |                                                         |
| GADD45A      | E6 (IMR90)                        | -            |                                                         |
| GJA1         | E7 (Ker)                          | 389.9        | Hearing loss                                            |
| GJA1         | E7 (Ker)                          | 426.1        | Conduction disorders                                    |
| GJA1         | E7 (Ker)                          | 746.7        | Other congenital anomalies of heart                     |
| GJA1         | E7 (Ker)                          | 755.1        | Other congenital anomalies of limbs                     |
| GJA1         | E7 (Ker)                          | 759.89       | Other and unspecified congenital anomalies              |
| HADHA        | E7 (Ker)                          | 277.85       | Other and unspecified disorders of<br>metabolism        |
| HADHA        | E7 (Ker)                          | 571.8        | Chronic liver disease and cirrhosis                     |
| HADHA        | E7 (Ker)                          | 642.5        | Hypertension complicating pregnancy                     |
| IFITM1       | E7 (Ker)                          | -            |                                                         |
| IGFBP3       | E6 (IMR90)                        | -            |                                                         |



|                  |                       |              |                                                              |
|------------------|-----------------------|--------------|--------------------------------------------------------------|
| ISG15            | E7 (Ker)              | -            |                                                              |
| IVL              | E7 (Ker)              | -            |                                                              |
| KRT16            | E7 (Ker)              | 757.39       | Congenital anomalies of the integument                       |
| KRT16            | E7 (Ker)              | 757.5        | Congenital anomalies of the integument                       |
| MDM2             | E6 (IMR90)            | 216.9        | Benign neoplasm of skin                                      |
| MMP1             | E7 (Ker)              | 496          | Chronic airway obstruction                                   |
| MMP1             | E7 (Ker)              | 757.39       | Congenital anomalies of the integument                       |
| MMP2             | E6 (IMR90) E7 (IMR90) | 733.9        | Other disorders of bone and cartilage                        |
| <b>MSH2</b>      | E6 (IMR90) E7 (IMR90) | <b>153</b>   | <b>Malignant neoplasm of colon</b>                           |
| <b>MSH2</b>      | E6 (IMR90) E7 (IMR90) | <b>183</b>   | <b>Malignant neoplasm of ovary</b>                           |
| MSH2             | E6 (IMR90) E7 (IMR90) | 191.9        | Malignant neoplasm of brain                                  |
| MSH2             | E6 (IMR90) E7 (IMR90) | 202.8        | Other malignant neoplasms of lymphoid and histiocytic tissue |
| MSH2             | E6 (IMR90) E7 (IMR90) | 237.7        | Neurofibromatosis                                            |
| MSH2             | E6 (IMR90) E7 (IMR90) | 706.2        | Diseases of sebaceous glands, Sebaceous cyst                 |
| MSH2             | E6 (IMR90) E7 (IMR90) | 709.09       | Other disorders of skin and subcutaneous tissue              |
| NDRG1            | E6 (IMR90)            | 356.1        | Hereditary and idiopathic peripheral neuropathy              |
| <b>ODC1</b>      | E6 (IMR90) E7 (IMR90) | <b>153</b>   | <b>Malignant neoplasm of colon</b>                           |
| PCNA             | E6 (IMR90) E7 (IMR90) | -            |                                                              |
|                  | E7 (Ker)              | -            |                                                              |
| PTTG1            | E6 (IMR90)            | -            |                                                              |
| SESN1            | E6 (IMR90) E6 (Ker)   | -            |                                                              |
| <b>TNFRSF10B</b> | E6 (IMR90)            | <b>173.9</b> | <b>Head and neck squamous carcinoma</b>                      |
| TNFRSF10C        | E6 (IMR90)            | -            |                                                              |
| TP53INP1         | E6 (IMR90)            | -            |                                                              |
| TRIM22           | E6 (IMR90)            | -            |                                                              |
| WEE1             | E7 (IMR90) E7 (Ker)   | -            |                                                              |

**Supplementary Table S15.** Tissue specificity analysis of EBV. Genes present and expressed in Burkitt's lymphoma (Raji cells) and B lymphocyte tissues are shown based on the GNF1H dataset in <http://biogps.org> with their expression values and their associated diseases.

| Gene | Number of probes | Average expression value in Burkitt's lymphoma (Raji) | Average expression value in B Lymphocytes | Icd-9 code | Icd-9 description | Is disease among virally-implicated? | Gene expressed in both tissues, single or neither? |
|------|------------------|-------------------------------------------------------|-------------------------------------------|------------|-------------------|--------------------------------------|----------------------------------------------------|
|------|------------------|-------------------------------------------------------|-------------------------------------------|------------|-------------------|--------------------------------------|----------------------------------------------------|

| cells)  |    |         |          |        |                                                                    |        |
|---------|----|---------|----------|--------|--------------------------------------------------------------------|--------|
| ACADM   | 1  | 2362.00 | 3038.50  | 277.85 | Other and unspecified disorders of metabolism                      | both   |
| ACTN4   | 2  | 782.75  | 1091.50  | 587    | Renal sclerosis                                                    | both   |
| ADA     | 3  | 2392.83 | 2359.83  | 277.2  | Other disorders of purine and pyrimidine metabolism                | both   |
| ADA     | 3  | 2392.83 | 2359.83  | 279.2  | Combined immunity deficiency                                       | * both |
| ATP7B   | 2  | 990.25  | 1062.75  | 275.1  | Disorders of copper metabolism                                     | both   |
| BAX     | 2  | 244.25  | 1073.50  | 153    | Malignant neoplasm of colon                                        | both   |
| BAX     | 2  | 244.25  | 1073.50  | 204    | Lymphoid leukemia                                                  | both   |
| BCL2    | 10 | 328.95  | 365.45   | 200    | B-cell lymphoma                                                    | * both |
| BCL3    | 3  | 474.67  | 379.17   | 200    | B-cell lymphoma                                                    | * both |
| BLNK    | 1  | 825.50  | 5514.00  | 279    | Hypogammaglobulinemia                                              | both   |
| CD46    | 5  | 540.40  | 1038.00  | 283.11 | Hemolytic-uremic syndrome                                          | both   |
| CD82    | 1  | 3477.50 | 1919.00  | 185    | Malignant neoplasm of prostate                                     | both   |
| CDKN2A  | 3  | 1443.33 | 484.00   | 157.8  | Malignant neoplasm of pancreas                                     | both   |
| CDKN2A  | 3  | 1443.33 | 484.00   | 161.9  | Malignant neoplasm of larynx                                       | both   |
| CDKN2A  | 3  | 1443.33 | 484.00   | 172.9  | Malignant melanoma of skin,                                        | both   |
| CDKN2A  | 3  | 1443.33 | 484.00   | V84.01 | Genetic susceptibility to malignant neoplasm of breast             | both   |
| CTSC    | 1  | 320.00  | 10801.00 | 523.4  | Chronic periodontitis                                              | both   |
| CTSC    | 1  | 320.00  | 10801.00 | 759.89 | Other and unspecified congenital anomalies                         | both   |
| CYP27B1 | 3  | 487.33  | 358.33   | 268    | Vitamin D deficiency                                               | both   |
| DDB2    | 1  | 1002.00 | 3277.50  | 757.33 | Congenital anomalies of the integument                             | both   |
| DHFR    | 4  | 468.75  | 2149.38  | 285.9  | Other and unspecified anemias                                      | both   |
| EFEMP2  | 5  | 530.80  | 221.60   | 756.83 | Other congenital musculoskeletal anomalies, Ehlers-Danlos syndrome | both   |
| EP300   | 4  | 268.88  | 334.00   | 153    | Malignant neoplasm of colon                                        | both   |
| EP300   | 4  | 268.88  | 334.00   | 759.89 | Other and unspecified congenital anomalies                         | both   |
| FANCC   | 2  | 959.25  | 533.25   | 284.09 | Fanconi anemia                                                     | both   |
| FHL3    | 1  | 424.50  | 216.00   | 288.4  | Diseases of white blood cells, Hemophagocytic syndromes            | * both |
| GLUD1   | 2  | 1593.25 | 3720.00  | 251.2  | Hypoglycemia, unspecified                                          | both   |
| GLUD1   | 2  | 1593.25 | 3720.00  | 255.2  | Adrenogenital disorders                                            | both   |
| GMPS    | 1  | 1779.50 | 4226.00  | 208.9  | Leukemia of unspecified cell type                                  | both   |
| HBB     | 3  | 817.00  | 515.83   | 207    | Other specified leukemia                                           | both   |
| HBB     | 3  | 817.00  | 515.83   | 282.49 | Hereditary hemolytic anemias, Other thalassemia                    | both   |
| HBB     | 3  | 817.00  | 515.83   | 282.6  | Hereditary hemolytic anemias, Sickle-cell disease                  | both   |
| HBB     | 3  | 817.00  | 515.83   | 282.7  | Hereditary hemolytic anemias, Other hemoglobinopathies             | both   |
| HBB     | 3  | 817.00  | 515.83   | 289.7  | Other diseases of blood and blood-forming organs,                  | both   |

|        |   |          |          |        |                                                                                            |        |
|--------|---|----------|----------|--------|--------------------------------------------------------------------------------------------|--------|
|        |   |          |          |        | Methemoglobinemia                                                                          |        |
| HLA-A  | 3 | 22339.83 | 34010.17 | 695.1  | Erythema multiforme                                                                        | both   |
| HLA-A  | 3 | 22339.83 | 34010.17 | 720    | Ankylosing spondylitis                                                                     | both   |
| HLA-A  | 3 | 22339.83 | 34010.17 | 995.27 | Certain adverse effects not elsewhere classified, Other drug allergy                       | both   |
| HLA-B  | 4 | 25292.38 | 36297.75 | 695.1  | Erythema multiforme                                                                        | both   |
| HLA-B  | 4 | 25292.38 | 36297.75 | 720    | Ankylosing spondylitis                                                                     | both   |
| HLA-B  | 4 | 25292.38 | 36297.75 | 995.27 | Certain adverse effects not elsewhere classified, Other drug allergy                       | both   |
| HRAS   | 2 | 628.50   | 779.00   | 188.9  | Malignant neoplasm of bladder                                                              | both   |
| HRAS   | 2 | 628.50   | 779.00   | 193    | Malignant neoplasm of thyroid gland                                                        | both   |
| HRAS   | 2 | 628.50   | 779.00   | 744.9  | Congenital anomalies of ear, face, and neck                                                | both   |
| HSPD1  | 6 | 4209.25  | 11484.08 | 94     | Neurosyphilis                                                                              | both   |
| IL1B   | 4 | 617.88   | 442.38   | 151.9  | Malignant neoplasm of stomach                                                              | * both |
| IL6    | 1 | 486.00   | 322.50   | 176.9  | Kaposi's sarcoma,                                                                          | both   |
| IL6    | 1 | 486.00   | 322.50   | 250    | Diabetes mellitus                                                                          | both   |
| IL6    | 1 | 486.00   | 322.50   | 555.9  | Regional enteritis, Unspecified site                                                       | both   |
| IL6    | 1 | 486.00   | 322.50   | 714    | Rheumatoid arthritis and other inflammatory polyarthropathies                              | both   |
| ITGB2  | 1 | 3014.50  | 4061.00  | 288.6  | Diseases of white blood cells                                                              | both   |
| KIT    | 1 | 212.00   | 219.50   | 186.9  | Malignant neoplasm of testis                                                               | both   |
| KIT    | 1 | 212.00   | 219.50   | 207.8  | Other specified leukemia                                                                   | both   |
| KIT    | 1 | 212.00   | 219.50   | 208.9  | Leukemia of unspecified cell type                                                          | both   |
| KIT    | 1 | 212.00   | 219.50   | 238.1  | Neoplasm of uncertain behavior of other and unspecified sites and tissues                  | * both |
| KIT    | 1 | 212.00   | 219.50   | 709.09 | Other disorders of skin and subcutaneous tissue                                            | both   |
| KIT    | 1 | 212.00   | 219.50   | 757.33 | Congenital anomalies of the integument                                                     | both   |
| LCK    | 2 | 310.25   | 4153.50  | 279.2  | Combined immunity deficiency                                                               | both   |
| LDHB   | 3 | 11363.17 | 22011.50 | 271.3  | Disorders of carbohydrate transport and metabolism, Intestinal disaccharidase deficiencies | both   |
| LRPPRC | 2 | 2266.75  | 4415.75  | 330.8  | Cerebral degenerations usually manifest in childhood                                       | both   |
| MDM2   | 8 | 270.25   | 219.06   | 216.9  | Benign neoplasm of skin                                                                    | both   |
| MSH2   | 1 | 585.50   | 1684.50  | 153    | Malignant neoplasm of colon                                                                | both   |
| MSH2   | 1 | 585.50   | 1684.50  | 183    | Malignant neoplasm of ovary and other uterine adnexa                                       | both   |
| MSH2   | 1 | 585.50   | 1684.50  | 191.9  | Malignant neoplasm of brain,                                                               | both   |
| MSH2   | 1 | 585.50   | 1684.50  | 202.8  | Other malignant neoplasms of lymphoid and histiocytic tissue                               | * both |
| MSH2   | 1 | 585.50   | 1684.50  | 237.7  | Neurofibromatosis                                                                          | both   |
| MSH2   | 1 | 585.50   | 1684.50  | 706.2  | Diseases of sebaceous glands, Sebaceous cyst                                               | both   |
| MSH2   | 1 | 585.50   | 1684.50  | 709.09 | Other disorders of skin and                                                                | both   |

|            |    |         |          |        |                                                                                   |        |
|------------|----|---------|----------|--------|-----------------------------------------------------------------------------------|--------|
|            |    |         |          |        | subcutaneous tissue                                                               |        |
| MSH2       | 1  | 585.50  | 1684.50  | V84.01 | Genetic susceptibility to malignant neoplasm of breast                            | both   |
| MYC        | 1  | 2472.50 | 5876.50  | 200.2  | Burkitt's lymphoma                                                                | * both |
| NAP1L1     | 9  | 8388.50 | 8389.72  | 365.9  | Glaucoma                                                                          | both   |
| NDRG1      | 1  | 485.50  | 279.00   | 356.1  | Peroneal muscular atrophy                                                         | both   |
| NFKBIA     | 1  | 2194.00 | 15825.00 | 757.31 | Congenital anomalies of the integument,                                           | both   |
| NME1       | 1  | 3645.00 | 12152.50 | 194    | Malignant neoplasm of other endocrine glands and related structures               | both   |
| OPTN       | 2  | 297.00  | 930.25   | 365.9  | Glaucoma                                                                          | both   |
| PCCB       | 1  | 1709.50 | 3239.00  | 276.2  | Acidosis                                                                          | both   |
| PEX5       | 4  | 1099.88 | 601.25   | 277.86 | Peroxisomal disorders                                                             | both   |
| PLAU       | 2  | 581.00  | 433.75   | 331    | Other cerebral degenerations                                                      | both   |
| PRPF8      | 1  | 2026.50 | 6409.50  | 362.74 | Pigmentary retinal dystrophy                                                      | both   |
| RB1        | 3  | 483.00  | 552.67   | 170.9  | Malignant neoplasm of bone and articular cartilage                                | both   |
| RB1        | 3  | 483.00  | 552.67   | 188.9  | Malignant neoplasm of bladder                                                     | both   |
| RB1        | 3  | 483.00  | 552.67   | 190.5  | Malignant neoplasm of eye, Retina                                                 | both   |
| SERPINA 1  | 8  | 394.50  | 1499.38  | 287.9  | Purpura and other hemorrhagic conditions,                                         | both   |
| SERPINA 1  | 8  | 394.50  | 1499.38  | 492.8  | Emphysema                                                                         | both   |
| SFTPB      | 5  | 537.60  | 293.50   | 515    | Postinflammatory pulmonary fibrosis                                               | both   |
| SMARCB1    | 2  | 1568.00 | 1055.75  | 191.9  | Malignant neoplasm of brain                                                       | both   |
| SMN1       | 1  | 605.00  | 526.00   | 335.1  | Anterior horn cell disease, Spinal muscular atrophy                               | both   |
| SRC        | 8  | 222.81  | 316.19   | 153    | Malignant neoplasm of colon                                                       | both   |
| TBP        | 2  | 628.25  | 862.50   | 332    | Parkinson's disease                                                               | both   |
| TBP        | 2  | 628.25  | 862.50   | 333.4  | Other extrapyramidal disease and abnormal movement disorders, Huntington's chorea | both   |
| TBP        | 2  | 628.25  | 862.50   | 334.3  | Spinocerebellar disease, Other cerebellar ataxia                                  | both   |
| TNFRSF 10B | 7  | 505.86  | 1134.57  | 173.9  | Other malignant neoplasm of skin                                                  | both   |
| TNNT3      | 1  | 890.50  | 223.00   | 728.3  | Disorders of muscle, ligament, and fascia                                         | both   |
| TNXB       | 15 | 254.57  | 210.57   | 756.83 | Ehlers-Danlos syndrome                                                            | both   |
| TP53       | 2  | 574.00  | 3729.50  | 147.9  | Malignant neoplasm of nasopharynx                                                 | * both |
| TP53       | 2  | 574.00  | 3729.50  | 153    | Malignant neoplasm of colon                                                       | both   |
| TP53       | 2  | 574.00  | 3729.50  | 157.8  | Malignant neoplasm of pancreas                                                    | both   |
| TP53       | 2  | 574.00  | 3729.50  | 170.9  | Malignant neoplasm of bone and articular cartilage                                | both   |
| TP53       | 2  | 574.00  | 3729.50  | 193    | Malignant neoplasm of thyroid gland                                               | both   |
| TP53       | 2  | 574.00  | 3729.50  | 194    | Malignant neoplasm of other endocrine glands                                      | both   |
| TP53       | 2  | 574.00  | 3729.50  | 211.5  | Benign neoplasm of liver and biliary passages                                     | * both |

|        |   |        |         |        |                                                                           |   |        |
|--------|---|--------|---------|--------|---------------------------------------------------------------------------|---|--------|
| TP53   | 2 | 574.00 | 3729.50 | 216.9  | Benign neoplasm of skin,                                                  |   | both   |
| TP53   | 2 | 574.00 | 3729.50 | 239.3  | Neoplasms of unspecified nature, Breast                                   | * | both   |
| TP53   | 2 | 574.00 | 3729.50 | 259.2  | Other endocrine disorders, Carcinoid                                      |   | both   |
| TP53   | 2 | 574.00 | 3729.50 | V84.01 | Genetic susceptibility to malignant neoplasm of breast                    |   | both   |
| TP63   | 7 | 559.29 | 231.64  | 374.46 | Other disorders of eyelids, Blepharophimosis                              |   | both   |
| TP63   | 7 | 559.29 | 231.64  | 755.4  | Other congenital anomalies of limbs,                                      |   | both   |
| TP63   | 7 | 559.29 | 231.64  | 755.5  | Other congenital anomalies of limbs,                                      |   | both   |
| TP63   | 7 | 559.29 | 231.64  | 755.67 | Other congenital anomalies of limbs,                                      |   | both   |
| TP63   | 7 | 559.29 | 231.64  | 757.31 | Congenital ectodermal dysplasia                                           |   | both   |
| TP63   | 7 | 559.29 | 231.64  | 757.8  | Congenital anomalies of the integument                                    |   | both   |
| TP73   | 2 | 342.50 | 528.25  | 194    | Malignant neoplasm of other endocrine glands                              |   | both   |
| TSG101 | 4 | 486.50 | 1033.25 | 239.3  | Neoplasms of unspecified nature, Breast                                   | * | both   |
| TYR    | 1 | 774.50 | 324.50  | 270.2  | Disorders of amino-acid transport and metabolism                          |   | both   |
| TYR    | 1 | 774.50 | 324.50  | 756.89 | Other congenital musculoskeletal anomalies                                |   | both   |
| VEGFA  | 7 | 673.00 | 1171.43 | 250    | Diabetes mellitus                                                         |   | both   |
| YWHAЕ  | 5 | 630.30 | 1648.60 | 758.33 | Chromosomal anomalies, Other microdeletions                               |   | both   |
| ZAP70  | 5 | 857.40 | 1563.90 | 757.1  | Congenital anomalies of the integument                                    |   | both   |
| APC    | 9 | 189.22 | 231.61  | 151.9  | Malignant neoplasm of stomach                                             | * | single |
| APC    | 9 | 189.22 | 231.61  | 153    | Malignant neoplasm of colon                                               |   | single |
| APC    | 9 | 189.22 | 231.61  | 171.9  | Malignant neoplasm of connective and other soft tissue                    |   | single |
| APC    | 9 | 189.22 | 231.61  | 211.3  | Benign neoplasm of other parts of digestive system, Colon                 |   | single |
| APC    | 9 | 189.22 | 231.61  | 211.4  | Benign neoplasm of other parts of digestive system, Rectum and anal canal |   | single |
| APC    | 9 | 189.22 | 231.61  | 287.2  | Purpura and other hemorrhagic conditions,                                 |   | single |
| APC    | 9 | 189.22 | 231.61  | 425.4  | Cardiomyopathy                                                            |   | single |
| APC    | 9 | 189.22 | 231.61  | -      | Hepatoblastoma                                                            | * | single |
| APOA1  | 2 | 298.75 | 114.75  | 272.1  | Pure hyperglyceridemia                                                    |   | single |
| APOA1  | 2 | 298.75 | 114.75  | 272.5  | Disorders of lipid metabolism                                             |   | single |
| APOA1  | 2 | 298.75 | 114.75  | 277.39 | Other amyloidosis                                                         |   | single |
| APOA1  | 2 | 298.75 | 114.75  | 281.4  | Protein-deficiency anemia                                                 |   | single |
| APOA1  | 2 | 298.75 | 114.75  | 371.5  | Corneal opacity and other disorders of cornea,                            |   | single |
| EGFR   | 9 | 309.83 | 137.28  | 162.9  | Malignant neoplasm of trachea, bronchus, and lung                         | * | single |
| FN1    | 8 | 215.13 | 173.50  | 183    | Malignant neoplasm of ovary and other uterine adnexa                      |   | single |
| FN1    | 8 | 215.13 | 173.50  | 208.9  | Leukemia of unspecified cell type                                         |   | single |
| FN1    | 8 | 215.13 | 173.50  | 569.89 | Other disorders of intestine                                              |   | single |

|              |   |        |        |        |                                                            |   |         |
|--------------|---|--------|--------|--------|------------------------------------------------------------|---|---------|
| GFAP         | 6 | 197.67 | 201.08 | 781.99 | Symptoms involving nervous and musculoskeletal systems     |   | single  |
| HSPB1        | 2 | 49.75  | 470.50 | 355.9  | Mononeuritis of lower limb                                 |   | single  |
| HSPB1        | 2 | 49.75  | 470.50 | 356.1  | Peroneal muscular atrophy                                  |   | single  |
| IGLL1        | 3 | 283.67 | 198.50 | 279    | Disorders involving the immune mechanism                   |   | single  |
| ITGA2B       | 6 | 211.92 | 122.92 | 287.1  | Purpura and other hemorrhagic conditions                   |   | single  |
| ITGA2B       | 6 | 211.92 | 122.92 | 287.5  | Purpura and other hemorrhagic conditions, Thrombocytopenia |   | single  |
| NEFL         | 3 | 270.83 | 52.33  | 356.1  | Hereditary and idiopathic peripheral neuropathy            |   | single  |
| PCCA         | 2 | 152.75 | 244.25 | 276.2  | Acidosis                                                   |   | single  |
| PSEN2        | 6 | 264.58 | 189.58 | 331    | Other cerebral degenerations                               |   | single  |
| PSEN2        | 6 | 264.58 | 189.58 | 425.4  | Cardiomyopathy                                             |   | single  |
| RECQL4       | 1 | 125.00 | 380.50 | 755.64 | Other congenital anomalies of limbs                        |   | single  |
| RECQL4       | 1 | 125.00 | 380.50 | 757.33 | Congenital anomalies of the integument                     |   | single  |
| SLC22A1<br>8 | 2 | 145.75 | 321.50 | 162.9  | Malignant neoplasm of trachea, bronchus, and lung          | * | single  |
| SLC22A1<br>8 | 2 | 145.75 | 321.50 | 171.9  | Malignant neoplasm of connective and other soft tissue     |   | single  |
| SLC22A1<br>8 | 2 | 145.75 | 321.50 | 239.3  | Neoplasms of unspecified nature, Breast                    | * | single  |
| VWF          | 2 | 200.50 | 143.75 | 286.4  | Coagulation defects, von Willebrand's disease              |   | single  |
| ADH1C        | 1 | 141.50 | 59.50  |        |                                                            |   | neither |
| <hr/>        |   |        |        |        |                                                            |   |         |
| ADIPOQ       | 1 | 121.00 | 43.50  |        |                                                            |   | neither |
| <hr/>        |   |        |        |        |                                                            |   |         |
| APOH         | 2 | 88.00  | 136.00 |        |                                                            |   | neither |
| <hr/>        |   |        |        |        |                                                            |   |         |
| CCND1        | 2 | 91.75  | 121.50 |        |                                                            |   | neither |
| <hr/>        |   |        |        |        |                                                            |   |         |
| CYP11B2      | 1 | 124.50 | 184.50 |        |                                                            |   | neither |
| <hr/>        |   |        |        |        |                                                            |   |         |
| EFEMP1       | 2 | 180.25 | 133.00 |        |                                                            |   | neither |
| <hr/>        |   |        |        |        |                                                            |   |         |
| FBLN5        | 1 | 110.50 | 61.00  |        |                                                            |   | neither |
| <hr/>        |   |        |        |        |                                                            |   |         |

|       |              |        |        |  |  |  |         |
|-------|--------------|--------|--------|--|--|--|---------|
| KLK3  | 4            | 155.38 | 112.63 |  |  |  | neither |
| LAMB1 | 2            | 98.00  | 33.00  |  |  |  | neither |
| MMP2  | 2            | 138.75 | 177.50 |  |  |  | neither |
| PAX6  | 1            | 74.50  | 27.50  |  |  |  | neither |
| PLTP  | 1            | 74.00  | 38.50  |  |  |  | neither |
| TRHR  | 1            | 46.00  | 40.00  |  |  |  | neither |
| NCF1  | not on array |        |        |  |  |  | neither |

**Supplementary Table S16.** Tissue specificity analysis of HPV16. Genes present and expressed in ovary and testis tissues are shown based on the GNF1H dataset in <http://biogps.org> with their expression values and their associated diseases.

| Gene    | Number of probes | Average expression value in ovary | Average expression value in testis | ICD-9 code | ICD-9 description                                           | Is disease among virally-implicated? | Gene expressed in both tissues, single or neither? |
|---------|------------------|-----------------------------------|------------------------------------|------------|-------------------------------------------------------------|--------------------------------------|----------------------------------------------------|
| ABCB1   | 1                | 376.50                            | 307.00                             | 974.7      | Poisoning by water, mineral, and uric acid metabolism drugs |                                      | both                                               |
| ADA     | 3                | 231.50                            | 307.83                             | 277.2      | Other disorders of purine and pyrimidine metabolism         |                                      | both                                               |
| ADA     | 3                | 231.50                            | 307.83                             | 279.2      | Combined immunity deficiency                                |                                      | both                                               |
| ALOX5AP | 1                | 378.00                            | 560.50                             | 410.9      | Acute myocardial infarction                                 |                                      | both                                               |
| ALOX5AP | 1                | 378.00                            | 560.50                             | 434.91     |                                                             |                                      | both                                               |
| ALPL    | 1                | 230.00                            | 318.50                             | 275.3      | Disorders of phosphorus metabolism                          |                                      | both                                               |

|        |    |         |        |        |                                                                           |   |      |
|--------|----|---------|--------|--------|---------------------------------------------------------------------------|---|------|
| ALPL   | 1  | 230.00  | 318.50 | 520.4  | Disorders of tooth development and eruption,                              |   | both |
| APC    | 9  | 276.44  | 248.78 | 151.9  | Malignant neoplasm of stomach                                             |   | both |
| APC    | 9  | 276.44  | 248.78 | 153    | Malignant neoplasm of colon                                               |   | both |
| APC    | 9  | 276.44  | 248.78 | 171.9  | Malignant neoplasm of connective and other soft tissue                    |   | both |
| APC    | 9  | 276.44  | 248.78 | 211.3  | Benign neoplasm of other parts of digestive system, Colon                 |   | both |
| APC    | 9  | 276.44  | 248.78 | 211.4  | Benign neoplasm of other parts of digestive system, Rectum and anal canal |   | both |
| APC    | 9  | 276.44  | 248.78 | 287.2  | Purpura and other hemorrhagic conditions                                  |   | both |
| APC    | 9  | 276.44  | 248.78 | 425.4  | Cardiomyopathy                                                            |   | both |
| APOB   | 1  | 289.00  | 381.00 | 272    | Disorders of lipid metabolism                                             |   | both |
| APOB   | 1  | 289.00  | 381.00 | 272.5  | Lipoprotein deficiencies                                                  |   | both |
| APP    | 5  | 488.90  | 497.10 | 255.5  | Disorders of adrenal glands                                               |   | both |
| APP    | 5  | 488.90  | 497.10 | 277.39 | Other and unspecified disorders of metabolism, Other amyloidosis          |   | both |
| APP    | 5  | 488.90  | 497.10 | 295.9  | Schizophrenic disorders                                                   |   | both |
| APP    | 5  | 488.90  | 497.10 | 331    | Other cerebral degenerations                                              |   | both |
| BCL2   | 10 | 537.85  | 479.35 | 200    | B-cell lymphoma                                                           |   | both |
| BRCA1  | 3  | 432.67  | 392.67 | 158.8  | Malignant neoplasm of retroperitoneum and peritoneum                      |   | both |
| BRCA1  | 3  | 432.67  | 392.67 | 183    | Malignant neoplasm of ovary and other uterine adnexa                      | * | both |
| BRCA1  | 3  | 432.67  | 392.67 | 239.3  | Neoplasms of unspecified nature, Breast                                   | * | both |
| CD82   | 1  | 379.00  | 440.50 | 185    | Malignant neoplasm of prostate                                            | * | both |
| CDK4   | 5  | 559.90  | 492.10 | 172.9  | Malignant melanoma of skin                                                |   | both |
| CEBPB  | 2  | 1454.25 | 337.00 | 253.3  | Disorders of the pituitary gland and its hypothalamic control             |   | both |
| CIITA  | 3  | 345.67  | 334.83 | 279.2  | Combined immunity deficiency                                              |   | both |
| CIITA  | 3  | 345.67  | 334.83 | 340    | Multiple sclerosis                                                        |   | both |
| CIITA  | 3  | 345.67  | 334.83 | 714    | Rheumatoid arthritis and other inflammatory polyarthropathies             |   | both |
| CREBBP | 2  | 301.00  | 611.00 | 368.5  | Visual disturbances, Color vision deficiencies                            |   | both |
| CREBBP | 2  | 301.00  | 611.00 | 368.54 | Visual disturbances, Achromatopsia                                        |   | both |
| CREBBP | 2  | 301.00  | 611.00 | 759.89 | Other and unspecified congenital anomalies                                |   | both |
| CXCR4  | 5  | 412.60  | 332.60 | 288.09 | Diseases of white blood cells, Other neutropenia                          |   | both |
| DDB2   | 1  | 320.50  | 479.00 | 757.33 | Congenital anomalies of the integument                                    |   | both |
| EGFR   | 9  | 403.39  | 546.78 | 162.9  | Malignant neoplasm of trachea, bronchus, and lung                         | * | both |
| ERBB2  | 8  | 306.00  | 414.38 | 151.9  | Malignant neoplasm of stomach                                             |   | both |
| ERBB2  | 8  | 306.00  | 414.38 | 183    | Malignant neoplasm of ovary and other uterine adnexa                      | * | both |
| ERBB2  | 8  | 306.00  | 414.38 | 191.9  | Malignant neoplasm of brain                                               |   | both |
| ERBB2  | 8  | 306.00  | 414.38 | 272.2  | Disorders of lipid metabolism, Mixed hyperlipidemia                       |   | both |
| ERBB2  | 8  | 306.00  | 414.38 | -      | Adenocarcinoma of lung                                                    | * | both |



|       |   |         |         |        |                                                                      |        |
|-------|---|---------|---------|--------|----------------------------------------------------------------------|--------|
| FANCC | 2 | 730.50  | 730.75  | 284.09 | Fanconi anemia                                                       | both   |
| FASLG | 3 | 607.00  | 360.17  | 710    | Diffuse diseases of connective tissue                                | both   |
| FBLN1 | 6 | 579.58  | 391.50  | 755.1  | Other congenital anomalies of limbs, Syndactyly                      | both   |
| FLNA  | 5 | 1683.40 | 804.70  | 378.3  | Strabismus and other disorders of binocular eye movements            | both   |
| FLNA  | 5 | 1683.40 | 804.70  | 733.9  | Other disorders of bone and cartilage                                | both   |
| FLNA  | 5 | 1683.40 | 804.70  | 756    | Other congenital musculoskeletal anomalies                           | both   |
| FLNA  | 5 | 1683.40 | 804.70  | 757.39 | Congenital anomalies of the integument                               | both   |
| FLNA  | 5 | 1683.40 | 804.70  | 759.89 | Other and unspecified congenital anomalies                           | both   |
| FN1   | 8 | 848.94  | 912.69  | 183    | Malignant neoplasm of ovary and other uterine adnexa                 | * both |
| FN1   | 8 | 848.94  | 912.69  | 208.9  | Leukemia of unspecified cell type                                    | both   |
| FN1   | 8 | 848.94  | 912.69  | 569.89 | Other disorders of intestine, Other                                  | both   |
| GFAP  | 6 | 515.92  | 302.58  | 781.99 | Symptoms involving nervous and musculoskeletal systems               | both   |
| GJA1  | 1 | 411.50  | 374.00  | 389.9  | Hearing loss                                                         | both   |
| GJA1  | 1 | 411.50  | 374.00  | 426.1  | Conduction disorders, Atrioventricular block                         | both   |
| GJA1  | 1 | 411.50  | 374.00  | 746.7  | Hypoplastic left heart syndrome                                      | both   |
| GJA1  | 1 | 411.50  | 374.00  | 755.1  | Syndactyly                                                           | both   |
| GJA1  | 1 | 411.50  | 374.00  | 759.89 | Other and unspecified congenital anomalies                           | both   |
| GSS   | 7 | 480.50  | 694.64  | 276.2  | Disorders of fluid, electrolyte, and acid-base balance, Acidosis     | both   |
| GSS   | 7 | 480.50  | 694.64  | 283.9  | Acquired hemolytic anemias,                                          | both   |
| HADHA | 5 | 585.10  | 507.20  | 277.85 | Disorders of fatty acid oxidation                                    | both   |
| HADHA | 5 | 585.10  | 507.20  | 571.8  | Chronic liver disease and cirrhosis,                                 | both   |
| HADHA | 5 | 585.10  | 507.20  | 642.5  | Severe pre-eclampsia                                                 | both   |
| HLA-A | 3 | 3113.17 | 6378.17 | 695.1  | Erythema multiforme                                                  | both   |
| HLA-A | 3 | 3113.17 | 6378.17 | 720    | Ankylosing spondylitis                                               | both   |
| HLA-A | 3 | 3113.17 | 6378.17 | 995.27 | Certain adverse effects not elsewhere classified, Other drug allergy | both   |
| ICAM1 | 4 | 641.88  | 623.88  | 84.6   | Malaria, Malaria, unspecified                                        | both   |
| IL10  | 1 | 204.00  | 237.00  | 042    | Human immunodeficiency virus [HIV] disease                           | both   |
| IL10  | 1 | 204.00  | 237.00  | 714    | Rheumatoid arthritis and other inflammatory polyarthropathies        | both   |
| IL10  | 1 | 204.00  | 237.00  | 742.2  | Other congenital anomalies of nervous system                         | both   |
| IL10  | 1 | 204.00  | 237.00  | 996.85 | Complications peculiar to certain specified procedures, Bone marrow  | both   |
| IL1B  | 4 | 372.25  | 359.75  | 151.9  | Malignant neoplasm of stomach                                        | both   |
| IL6   | 1 | 443.00  | 299.50  | 176.9  | Kaposi's sarcoma                                                     | both   |
| IL6   | 1 | 443.00  | 299.50  | 250    | Diabetes mellitus                                                    | both   |
| IL6   | 1 | 443.00  | 299.50  | 555.9  | Regional enteritis, Unspecified site                                 | both   |
| IL6   | 1 | 443.00  | 299.50  | 714    | Rheumatoid arthritis and other inflammatory polyarthropathies        | both   |

|           |   |         |         |        |                                                                                   |   |      |
|-----------|---|---------|---------|--------|-----------------------------------------------------------------------------------|---|------|
| IRF1      | 1 | 669.50  | 929.00  | 151.9  | Malignant neoplasm of stomach                                                     |   | both |
| IRF1      | 1 | 669.50  | 929.00  | 162.9  | Malignant neoplasm of trachea, bronchus, and lung                                 | * | both |
| IRF1      | 1 | 669.50  | 929.00  | 205.9  | Myeloid leukemia                                                                  |   | both |
| IRF1      | 1 | 669.50  | 929.00  | 281.9  | Other deficiency anemias                                                          |   | both |
| IRF1      | 1 | 669.50  | 929.00  | 742.59 | Other congenital anomalies of nervous system                                      |   | both |
| LMO2      | 1 | 408.00  | 508.50  | 208.9  | Leukemia of unspecified cell type                                                 |   | both |
| MAN2B1    | 1 | 377.50  | 518.50  | 271.8  | Disorders of carbohydrate transport and metabolism                                |   | both |
| MDM2      | 8 | 294.00  | 289.44  | 216.9  | Benign neoplasm of skin                                                           |   | both |
| MEFV      | 4 | 467.38  | 274.63  | 277.31 | Familial Mediterranean fever                                                      |   | both |
| MMP2      | 2 | 1146.50 | 1142.50 | 733.9  | Other disorders of bone and cartilage                                             |   | both |
| MYC       | 1 | 248.00  | 306.50  | 200.2  | Burkitt's lymphoma                                                                |   | both |
| NAT1      | 1 | 335.00  | 318.50  | 333    | Other extrapyramidal disease and abnormal movement disorders                      |   | both |
| NDRG1     | 1 | 2543.00 | 1941.00 | 356.1  | Peroneal muscular atrophy                                                         |   | both |
| NUMA1     | 6 | 249.17  | 1143.83 | 208.9  | Leukemia of unspecified cell type                                                 |   | both |
| ODC1      | 2 | 851.50  | 2867.50 | 153    | Malignant neoplasm of colon                                                       |   | both |
| PLAU      | 2 | 223.25  | 222.25  | 331    | Other cerebral degenerations                                                      |   | both |
| PRPH      | 6 | 362.75  | 643.92  | 335.2  | Anterior horn cell disease, Motor neuron disease                                  |   | both |
| PRPH      | 6 | 362.75  | 643.92  | 362.16 | Other retinal disorders, Retinal neovascularization                               |   | both |
| PRPH      | 6 | 362.75  | 643.92  | 362.7  | Other retinal disorders, Hereditary retinal dystrophies                           |   | both |
| PRPH      | 6 | 362.75  | 643.92  | 362.74 | Other retinal disorders, Pigmentary retinal dystrophy                             |   | both |
| PYGM      | 3 | 493.00  | 705.83  | 271    | Disorders of carbohydrate transport and metabolism                                |   | both |
| SQSTM1    | 5 | 421.20  | 500.90  | 731    | Osteitis deformans and osteopathies                                               |   | both |
| TBP       | 2 | 782.50  | 890.25  | 332    | Parkinson's disease                                                               |   | both |
| TBP       | 2 | 782.50  | 890.25  | 333.4  | Other extrapyramidal disease and abnormal movement disorders, Huntington's chorea |   | both |
| TBP       | 2 | 782.50  | 890.25  | 334.3  | Spinocerebellar disease, Other cerebellar ataxia                                  |   | both |
| TF        | 9 | 312.61  | 530.83  | 273.8  | Disorders of plasma protein metabolism,                                           |   | both |
| TF        | 9 | 312.61  | 530.83  | 285.9  | Other and unspecified anemias,                                                    |   | both |
| TNF       | 1 | 418.50  | 311.00  | 84.6   | Malaria                                                                           |   | both |
| TNF       | 1 | 418.50  | 311.00  | 294.8  | Persistent mental disorders due to conditions                                     |   | both |
| TNF       | 1 | 418.50  | 311.00  | 346.9  | Migraine                                                                          |   | both |
| TNF       | 1 | 418.50  | 311.00  | 493.9  | Asthma                                                                            |   | both |
| TNF       | 1 | 418.50  | 311.00  | 995.91 | Certain adverse effects not elsewhere classified, Sepsis                          |   | both |
| TNFRSF10B | 7 | 233.79  | 284.00  | 173.9  | Other malignant neoplasm of skin                                                  | * | both |
| TNFRSF1A  | 2 | 805.25  | 493.00  | 277.3  | Other and unspecified disorders of metabolism, Amyloidosis                        |   | both |
| TP53      | 2 | 278.75  | 331.25  | 147.9  | Malignant neoplasm of nasopharynx                                                 |   | both |

|       |   |        |        |        |                                                                                                                       |   |        |
|-------|---|--------|--------|--------|-----------------------------------------------------------------------------------------------------------------------|---|--------|
| TP53  | 2 | 278.75 | 331.25 | 153    | Malignant neoplasm of colon                                                                                           | * | both   |
| TP53  | 2 | 278.75 | 331.25 | 157.8  | Malignant neoplasm of pancreas                                                                                        |   | both   |
| TP53  | 2 | 278.75 | 331.25 | 170.9  | Malignant neoplasm of bone and articular cartilage                                                                    |   | both   |
| TP53  | 2 | 278.75 | 331.25 | 193    | Malignant neoplasm of thyroid gland                                                                                   |   | both   |
| TP53  | 2 | 278.75 | 331.25 | 194    | Malignant neoplasm of other endocrine glands                                                                          |   | both   |
| TP53  | 2 | 278.75 | 331.25 | 211.5  | Benign neoplasm of liver and biliary passages                                                                         |   | both   |
| TP53  | 2 | 278.75 | 331.25 | 216.9  | Benign neoplasm of skin                                                                                               |   | both   |
| TP53  | 2 | 278.75 | 331.25 | 239.3  | Neoplasms of unspecified nature, Breast                                                                               | * | both   |
| TP53  | 2 | 278.75 | 331.25 | 259.2  | Other endocrine disorders, Carcinoid syndrome                                                                         |   | both   |
| TP53  | 2 | 278.75 | 331.25 | V84.01 | Genetic susceptibility to malignant neoplasm of breast                                                                |   | both   |
| TP63  | 7 | 268.50 | 318.36 | 374.46 | Other disorders of eyelids, Blepharophimosis                                                                          |   | both   |
| TP63  | 7 | 268.50 | 318.36 | 755.4  | Other congenital anomalies of limbs,                                                                                  |   | both   |
| TP63  | 7 | 268.50 | 318.36 | 755.5  | Other congenital anomalies of limbs,                                                                                  |   | both   |
| TP63  | 7 | 268.50 | 318.36 | 755.67 | Other congenital anomalies of limbs, Anomalies of foot                                                                |   | both   |
| TP63  | 7 | 268.50 | 318.36 | 757.31 | Congenital ectodermal dysplasia                                                                                       |   | both   |
| TP63  | 7 | 268.50 | 318.36 | 757.8  | Congenital anomalies of the integument,                                                                               |   | both   |
| TP73  | 2 | 698.75 | 464.00 | 194    | Malignant neoplasm of other endocrine glands and related structures                                                   |   | both   |
| TSHB  | 1 | 724.50 | 528.00 | 244.9  | Acquired hypothyroidism                                                                                               |   | both   |
| UBE3A | 6 | 287.08 | 247.33 | 759.89 | Other and unspecified congenital anomalies                                                                            |   | both   |
| CASP8 | 2 | 242.25 | 177.75 | 162.9  | Malignant neoplasm of trachea, bronchus, and lung                                                                     | * | single |
| CASP8 | 2 | 242.25 | 177.75 | 211.5  | Benign neoplasm of liver and biliary passages                                                                         |   | single |
| CASP8 | 2 | 242.25 | 177.75 | 239.3  | Neoplasms of unspecified nature, Breast                                                                               | * | single |
| CASP8 | 2 | 242.25 | 177.75 | 279.4  | Disorders involving the immune mechanism, Autoimmune disease                                                          |   | single |
| CEBPA | 1 | 190.00 | 334.00 | 208.9  | Leukemia of unspecified cell type                                                                                     |   | single |
| EP300 | 4 | 151.25 | 226.13 | 153    | Malignant neoplasm of colon                                                                                           |   | single |
| EP300 | 4 | 151.25 | 226.13 | 759.89 | Other and unspecified congenital anomalies                                                                            |   | single |
| F9    | 1 | 274.50 | 169.00 | 193    | Malignant neoplasm of thyroid gland                                                                                   |   | single |
| F9    | 1 | 274.50 | 169.00 | 286    | Coagulation defects                                                                                                   |   | single |
| F9    | 1 | 274.50 | 169.00 | 995.2  | Adverse effect of drug, medicinal and biological substance (due) to correct medicinal substance properly administered |   | single |
| GNRHR | 5 | 240.00 | 152.00 | 253.4  | Disorders of the pituitary gland and its hypothalamic control                                                         |   | single |
| GNRHR | 5 | 240.00 | 152.00 | 257.2  | Testicular dysfunction                                                                                                |   | single |
| MYH7  | 2 | 163.50 | 604.75 | 359    | Muscular dystrophies                                                                                                  |   | single |
| MYH7  | 2 | 163.50 | 604.75 | 359.9  | Muscular dystrophies                                                                                                  |   | single |
| MYH7  | 2 | 163.50 | 604.75 | 425.4  | Cardiomyopathy                                                                                                        |   | single |

|        |   |        |        |        |                                                                |          |
|--------|---|--------|--------|--------|----------------------------------------------------------------|----------|
| OPRM1  | 9 | 275.17 | 198.72 | 345.9  | Epilepsy and recurrent seizures                                | single   |
| OPRM1  | 9 | 275.17 | 198.72 | 709    | Other disorders of skin and subcutaneous tissue                | single   |
| RB1    | 3 | 218.17 | 183.67 | 170.9  | Malignant neoplasm of bone and articular cartilage             | single   |
| RB1    | 3 | 218.17 | 183.67 | 188.9  | Malignant neoplasm of bladder                                  | * single |
| RB1    | 3 | 218.17 | 183.67 | 190.5  | Malignant neoplasm of eye, Retina                              | single   |
| RBL2   | 3 | 177.33 | 590.83 | 331.4  | Other cerebral degenerations, Obstructive hydrocephalus        | single   |
| TSC2   | 3 | 137.83 | 235.67 | 518.89 | Other diseases of lung                                         | single   |
| TSC2   | 3 | 137.83 | 235.67 | 759.5  | Other and unspecified congenital anomalies, Tuberous sclerosis | single   |
| APOA2  | 2 | 106.00 | 124.00 |        |                                                                | neither  |
| <hr/>  |   |        |        |        |                                                                |          |
| APOH   | 2 | 132.25 | 62.75  |        |                                                                | neither  |
| <hr/>  |   |        |        |        |                                                                |          |
| BAX    | 2 | 145.00 | 114.75 |        |                                                                | neither  |
| <hr/>  |   |        |        |        |                                                                |          |
| CCL5   | 2 | 175.25 | 172.25 |        |                                                                | neither  |
| <hr/>  |   |        |        |        |                                                                |          |
| CETP   | 1 | 37.00  | 56.00  |        |                                                                | neither  |
| <hr/>  |   |        |        |        |                                                                |          |
| DHFR   | 4 | 154.75 | 158.00 |        |                                                                | neither  |
| <hr/>  |   |        |        |        |                                                                |          |
| EDN1   | 1 | 68.50  | 126.50 |        |                                                                | neither  |
| <hr/>  |   |        |        |        |                                                                |          |
| HOXD13 | 2 | 115.00 | 105.50 |        |                                                                | neither  |
| <hr/>  |   |        |        |        |                                                                |          |
| KRT16  | 1 | 14.00  | 83.50  |        |                                                                | neither  |
| <hr/>  |   |        |        |        |                                                                |          |
| MMP1   | 1 | 39.50  | 7.00   |        |                                                                | neither  |
| <hr/>  |   |        |        |        |                                                                |          |

|        |   |        |        |  |  |  |         |
|--------|---|--------|--------|--|--|--|---------|
| MSH2   | 1 | 108.50 | 83.50  |  |  |  | neither |
| PPARG  | 1 | 130.00 | 45.00  |  |  |  | neither |
| SELE   | 1 | 101.00 | 112.00 |  |  |  | neither |
| SPINK1 | 1 | 52.50  | 137.50 |  |  |  | neither |
| TERT   | 1 | 146.50 | 177.00 |  |  |  | neither |
| TGM1   | 1 | 32.50  | 50.50  |  |  |  | Neither |

**Supplementary Figure S11.** Degree of viral targets compared to random targets.

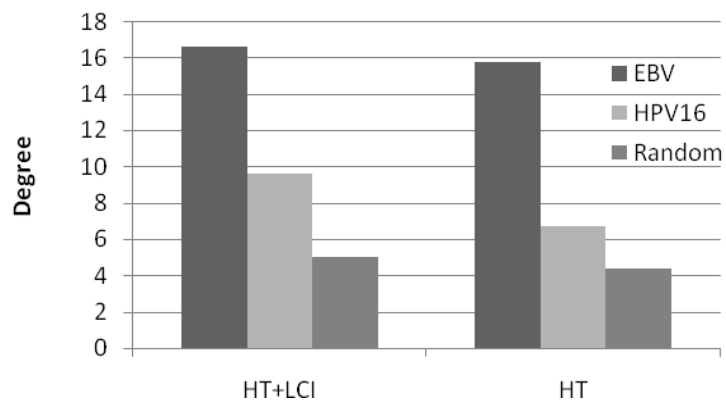

**Supplementary Figure S12.** Average shortest path between viral targets and randomized genes associated with virally implicated diseases.

**a**

**b**

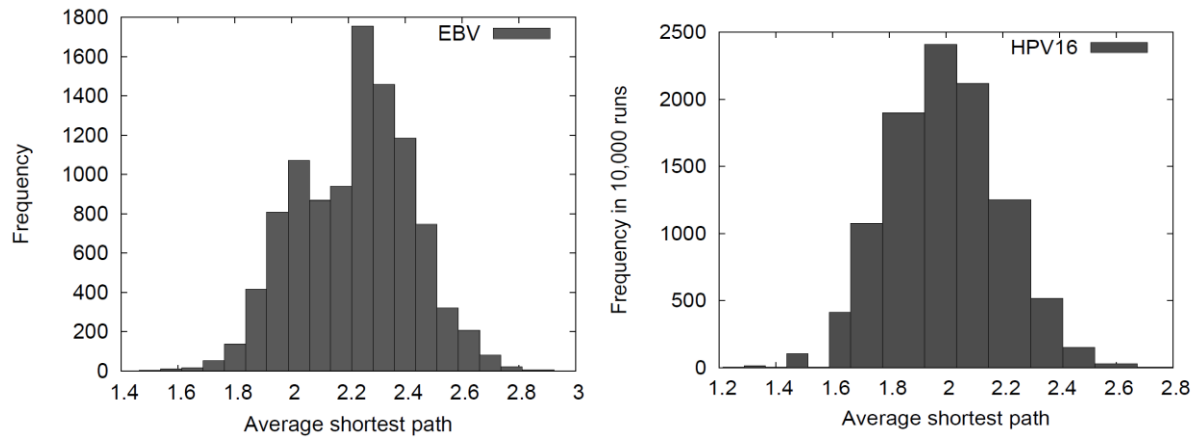

**Supplementary Table S17.** 38 OMIM diseases that have significant prevalence among HPV patients.

| ICD-9 code  | ICD-9 description                                                | Patients with disease among HPV patients | Patients with disease among ALL patients | RR          | Lower bound | Upper bound  | RR (%99 CI) |
|-------------|------------------------------------------------------------------|------------------------------------------|------------------------------------------|-------------|-------------|--------------|-------------|
| 781         | Other diseases due to viruses and Chlamydiae, Viral warts        | 1630                                     | 1630                                     | 550.82      | 516.77      | 587.10       | 550.82      |
| 6424        | Hypertension complicating pregnancy, childbirth.                 | 1                                        | 3                                        | 183.61      | 13.97       | 2413.47      | 183.61      |
| 6238        | Noninflammatory disorders of vagina                              | 560                                      | 8203                                     | 37.60       | 33.72       | 41.93        | 37.60       |
| 36212       | Other retinal disorders, Exudative retinopathy                   | 1                                        | 27                                       | 20.40       | 1.55        | 268.16       | 20.40       |
| 1905        | Malignant neoplasm of eye, Retina                                | 1                                        | 35                                       | 15.74       | 1.20        | 206.86       | 15.74       |
| 2711        | Disorders of carbohydrate transport and metabolism, Galactosemia | 1                                        | 36                                       | 15.30       | 1.16        | 201.12       | 15.30       |
| 182         | Malignant neoplasm of body of uterus                             | 1324                                     | 55419                                    | 13.16       | 12.26       | 14.12        | 13.16       |
| 7528        | Congenital anomalies of genital organs                           | 6                                        | 260                                      | 12.71       | 4.44        | 36.38        | 12.71       |
| 2814        | Protein-deficiency anemia                                        | 4                                        | 273                                      | 8.07        | 2.23        | 29.26        | 8.07        |
| 1991        | Malignant neoplasm without specification of site                 | 304                                      | 26028                                    | 6.43        | 5.55        | 7.46         | 6.43        |
| <b>1588</b> | <b>Malignant neoplasm of peritoneum</b>                          | <b>15</b>                                | <b>1329</b>                              | <b>6.22</b> | <b>3.20</b> | <b>12.09</b> | <b>6.22</b> |
| 218         | Uterine leiomyoma                                                | 755                                      | 68405                                    | 6.08        | 5.54        | 6.68         | 6.08        |
| 2693        | Mineral deficiency, not elsewhere classified                     | 4                                        | 438                                      | 5.03        | 1.39        | 18.24        | 5.03        |
| <b>183</b>  | <b>Malignant neoplasm of ovary and other uterine adnexa</b>      | <b>275</b>                               | <b>30275</b>                             | <b>5.00</b> | <b>4.28</b> | <b>5.84</b>  | <b>5.00</b> |
| 2398        | Neoplasms of unspecified nature                                  | 12                                       | 1381                                     | 4.79        | 2.28        | 10.07        | 4.79        |
| 6927        | Contact dermatitis and other eczema, Due to solar radiation      | 4                                        | 495                                      | 4.45        | 1.23        | 16.14        | 4.45        |
| 330         | Cerebral degenerations usually                                   | 3                                        | 372                                      | 4.44        | 1.00        | 19.66        | 4.44        |

manifest in childhood

|             |                                                                      |            |              |             |             |             |             |
|-------------|----------------------------------------------------------------------|------------|--------------|-------------|-------------|-------------|-------------|
| 2698        | Other nutritional deficiencies                                       | 7          | 912          | 4.23        | 1.60        | 11.19       | 4.23        |
| 4571        | Noninfectious disorders of lymphatic channels                        | 65         | 8650         | 4.14        | 3.01        | 5.70        | 4.14        |
| 171         | Malignant neoplasm of connective and other soft tissue               | 32         | 4661         | 3.78        | 2.40        | 5.96        | 3.78        |
| <b>284</b>  | <b>Aplastic anemia and other bone marrow failure syndromes</b>       | <b>330</b> | <b>49062</b> | <b>3.70</b> | <b>3.22</b> | <b>4.27</b> | <b>3.70</b> |
| <b>216</b>  | <b>Benign neoplasm of skin</b>                                       | <b>32</b>  | <b>5480</b>  | <b>3.22</b> | <b>2.04</b> | <b>5.07</b> | <b>3.22</b> |
| 7011        | Keratoderma                                                          | 22         | 3934         | 3.08        | 1.78        | 5.33        | 3.08        |
| 704         | Diseases of hair and hair follicles                                  | 10         | 1911         | 2.88        | 1.28        | 6.51        | 2.88        |
| 2880        | Diseases of white blood cells, Neutropenia                           | 302        | 60248        | 2.76        | 2.38        | 3.20        | 2.76        |
| 448         | Disease of capillaries                                               | 17         | 3420         | 2.74        | 1.47        | 5.11        | 2.74        |
| <b>188</b>  | <b>Malignant neoplasm of bladder</b>                                 | <b>137</b> | <b>27706</b> | <b>2.72</b> | <b>2.19</b> | <b>3.39</b> | <b>2.72</b> |
| 593         | Other disorders of kidney and ureter                                 | 911        | 184443       | 2.72        | 2.50        | 2.96        | 2.72        |
| 5997        | Other disorders of urethra and urinary tract, Hematuria              | 652        | 134644       | 2.67        | 2.41        | 2.95        | 2.67        |
| 2362        | Neoplasm of uncertain behavior of genitourinary organs, Ovary        | 15         | 3212         | 2.57        | 1.32        | 5.00        | 2.57        |
| 170         | Malignant neoplasm of bone and articular cartilage                   | 13         | 2808         | 2.55        | 1.25        | 5.21        | 2.55        |
| 2863        | Coagulation defects, Congenital deficiency of other clotting factors | 9          | 2028         | 2.44        | 1.04        | 5.77        | 2.44        |
| 2752        | Disorders of mineral metabolism                                      | 128        | 29063        | 2.43        | 1.93        | 3.05        | 2.43        |
| 5698        | Other disorders of intestine                                         | 232        | 57630        | 2.22        | 1.87        | 2.63        | 2.22        |
| <b>173</b>  | <b>Other malignant neoplasm of skin</b>                              | <b>81</b>  | <b>20316</b> | <b>2.20</b> | <b>1.65</b> | <b>2.92</b> | <b>2.20</b> |
| 586         | Renal failure, unspecified                                           | 183        | 47789        | 2.11        | 1.74        | 2.55        | 2.11        |
| 453         | Other venous embolism and thrombosis                                 | 552        | 147560       | 2.06        | 1.85        | 2.30        | 2.06        |
| <b>7062</b> | <b>Diseases of sebaceous glands, Sebaceous cyst</b>                  | <b>22</b>  | <b>5884</b>  | <b>2.06</b> | <b>1.19</b> | <b>3.57</b> | <b>2.06</b> |

## References

1. Lamesch P, Li N, Milstein S, Fan C, Hao T, et al. (2007) hORFeome v3.1: a resource of human open reading frames representing over 10,000 human genes. *Genomics* 89: 307-315.
2. Rual JF, Hirozane-Kishikawa T, Hao T, Bertin N, Li S, et al. (2004) Human ORFeome version 1.1: a platform for reverse proteomics. *Genome Res* 14: 2128-2135.
3. Rual JF, Venkatesan K, Hao T, Hirozane-Kishikawa T, Dricot A, et al. (2005) Towards a proteome-scale map of the human protein-protein interaction network. *Nature* 437: 1173-1178.
4. Dreze M, Monachello D, Lurin C, Cusick ME, Hill DE, et al. (2009) High-quality binary interactome mapping. *Methods Enzymol* 470: 281-315.
5. Calderwood MA, Venkatesan K, Xing L, Chase MR, Vazquez A, et al. (2007) Epstein-Barr virus and virus human protein interaction maps. *Proc Natl Acad Sci USA* 104: 7606-7611.

6. Chatr-aryamontri A, Ceol A, Peluso D, Nardozza A, Panni S, et al. (2009) VirusMINT: a viral protein interaction database. *Nucleic Acids Res* 37: D669-673.
7. Huh KW, DeMasi J, Ogawa H, Nakatani Y, Howley PM, et al. (2005) Association of the human papillomavirus type 16 E7 oncoprotein with the 600-kDa retinoblastoma protein-associated factor, p600. *Proc Natl Acad Sci USA* 102: 11492-11497.
8. Aranda B, Achuthan P, Alam-Faruque Y, Armean I, Bridge A, et al. (2010) The IntAct molecular interaction database in 2010. *Nucleic Acids Res* 38: D525-531.
9. Ceol A, Chatr Aryamontri A, Licata L, Peluso D, Briganti L, et al. (2010) MINT, the molecular interaction database: 2009 update. *Nucleic Acids Res* 38: D532-539.
10. Stelzl U, Worm U, Lalowski M, Haenig C, Brembeck FH, et al. (2005) A human protein-protein interaction network: a resource for annotating the proteome. *Cell* 122: 957-968.
11. Venkatesan K, Rual JF, Vazquez A, Stelzl U, Lemmens I, et al. (2009) An empirical framework for binary interactome mapping. *Nat Methods* 6: 83-90.
12. Matys V, Kel-Margoulis OV, Fricke E, Liebich I, Land S, et al. (2006) TRANSFAC and its module TRANSCompel: transcriptional gene regulation in eukaryotes. *Nucleic Acids Res* 34: D108-110.
13. Mani KM, Lefebvre C, Wang K, Lim WK, Basso K, et al. (2008) A systems biology approach to prediction of oncogenes and molecular perturbation targets in B-cell lymphomas. *Mol Syst Biol* 4: 169.
14. Lee DS, Park J, Kay KA, Christakis NA, Oltvai ZN, et al. (2008) The implications of human metabolic network topology for disease comorbidity. *Proc Natl Acad Sci USA* 105: 9880-9885.
15. Kanehisa M, Goto S, Furumichi M, Tanabe M, Hirakawa M (2010) KEGG for representation and analysis of molecular networks involving diseases and drugs. *Nucleic Acids Res* 38: D355-360.
16. Schellenberger J, Park JO, Conrad TM, Palsson BO (2010) BiGG: a Biochemical Genetic and Genomic knowledgebase of large scale metabolic reconstructions. *BMC Bioinformatics* 11: 213.
17. Burgard AP, Nikolaev EV, Schilling CH, Maranas CD (2004) Flux coupling analysis of genome-scale metabolic network reconstructions. *Genome Res* 14: 301-312.
18. Duarte NC, Becker SA, Jamshidi N, Thiele I, Mo ML, et al. (2007) Global reconstruction of the human metabolic network based on genomic and bibliomic data. *Proc Natl Acad Sci USA* 104: 1777-1782.
19. Amberger J, Bocchini CA, Scott AF, Hamosh A (2009) McKusick's Online Mendelian Inheritance in Man (OMIM). *Nucleic Acids Res* 37: D793-796.
20. Goh KI, Cusick ME, Valle D, Childs B, Vidal M, et al. (2007) The human disease network. *Proc Natl Acad Sci USA* 104: 8685-8690.
21. Valiant LG (1979) The complexity of enumeration and reliability problems. *Siam J Computing* 8: 410-421.
22. Roberts B (2007) Estimating the number of s-t paths in a graph. *J Graph Algorithms Applications* 11: 195-214.
23. Barabási AL, Oltvai ZN (2004) Network biology: understanding the cell's functional organization. *Nat Rev Genet* 5: 101-113.
24. Uetz P, Rajagopala SV, Dong YA, Haas J (2004) From ORFeomes to protein interaction maps in viruses. *Genome Res* 14: 2029-2033.
25. Gerlee P, Lizana L, Sneppen K (2009) Pathway identification by network pruning in the metabolic network of *Escherichia coli*. *Bioinformatics* 25: 3282-3288.
26. Gentleman RC, Carey VJ, Bates DM, Bolstad B, Dettling M, et al. (2004) Bioconductor: open software development for computational biology and bioinformatics. *Genome Biol* 5: R80.
27. Barrett T, Troup DB, Wilhite SE, Ledoux P, Evangelista C, et al. (2010) NCBI GEO: archive for functional genomics data sets--10 years on. *Nucleic Acids Res*.



28. McLaughlin-Drubin ME, Munger K (2009) Oncogenic activities of human papillomaviruses. *Virus Res* 143: 195-208.
29. Schiffman M, Castle PE, Jeronimo J, Rodriguez AC, Wacholder S (2007) Human papillomavirus and cervical cancer. *Lancet* 370: 890-907.
30. Scheffner M, Munger K, Byrne JC, Howley PM (1991) The state of the p53 and retinoblastoma genes in human cervical carcinoma cell lines. *Proc Natl Acad Sci USA* 88: 5523-5527.
31. Park J, Lee DS, Christakis NA, Barabasi AL (2009) The impact of cellular networks on disease comorbidity. *Mol Syst Biol* 5: 262.
32. Hidalgo CA, Blumm N, Barabasi AL, Christakis NA (2009) A dynamic network approach for the study of human phenotypes. *PLoS Comput Biol* 5: e1000353.
33. Katz D, Baptista J, Azen SP, Pike MC (1978) Obtaining confidence intervals for the risk ratio in cohort studies. *Biometrics* 34: 469-474.
34. Kieff E, Rickinson AB (2001) Epstein-Barr Virus and its replication. In: Knipe DM, Howley PM, editors. *Fundamental Virology*. Philadelphia: Lippincott Williams & Wilkins. pp. 1185-1247.
35. Navlakha S, Kingsford C (2010) The power of protein interaction networks for associating genes with diseases. *Bioinformatics* 26: 1057-1063.
36. Vanunu O, Mager O, Ruppin E, Shlomi T, Sharan R (2010) Associating genes and protein complexes with disease via network propagation. *PLoS Comput Biol* 6: e1000641.
37. Tategu M, Arauchi T, Tanaka R, Nakagawa H, Yoshida K (2007) Systems biology-based identification of crosstalk between E2F transcription factors and the Fanconi anemia pathway. *Gene Regul Syst Bio* 1: 1-8.
38. Su AI, Cooke MP, Ching KA, Hakak Y, Walker JR, et al. (2002) Large-scale analysis of the human and mouse transcriptomes. *Proc Natl Acad Sci USA* 99: 4465-4470.
39. Niedobitek G, Agathangelou A, Rowe M, Jones EL, Jones DB, et al. (1995) Heterogeneous expression of Epstein-Barr virus latent proteins in endemic Burkitt's lymphoma. *Blood* 86: 659-665.
40. Kelly GL, Milner AE, Baldwin GS, Bell AI, Rickinson AB (2006) Three restricted forms of Epstein-Barr virus latency counteracting apoptosis in c-myc-expressing Burkitt lymphoma cells. *Proc Natl Acad Sci USA* 103: 14935-14940.
41. Yano T, Sander CA, Andrade RE, Gauwerky CE, Croce CM, et al. (1993) Molecular analysis of the BCL-3 locus at chromosome 17q22 in B-cell neoplasms. *Blood* 82: 1813-1819.
42. Canoz O, Rassidakis GZ, Admirand JH, Medeiros LJ (2004) Immunohistochemical detection of BCL-3 in lymphoid neoplasms: a survey of 353 cases. *Mod Pathol* 17: 911-917.
43. Flavell KJ, Murray PG (2000) Hodgkin's disease and the Epstein-Barr virus. *Mol Pathol* 53: 262-269.
44. Young LS, Rickinson AB (2004) Epstein-Barr virus: 40 years on. *Nat Rev Cancer* 4: 757-768.
45. Sugawara Y, Mizugaki Y, Uchida T, Torii T, Imai S, et al. (1999) Detection of Epstein-Barr virus (EBV) in hepatocellular carcinoma tissue: a novel EBV latency characterized by the absence of EBV-encoded small RNA expression. *Virology* 256: 196-202.
46. Li W, Wu BA, Zeng YM, Chen GC, Li XX, et al. (2004) Epstein-Barr virus in hepatocellular carcinogenesis. *World J Gastroenterol* 10: 3409-3413.
47. Castro CY, Ostrowski ML, Barrios R, Green LK, Popper HH, et al. (2001) Relationship between Epstein-Barr virus and lymphoepithelioma-like carcinoma of the lung: a clinicopathologic study of 6 cases and review of the literature. *Hum Pathol* 32: 863-872.
48. Ngan RK, Yip TT, Cheng WW, Chan JK, Cho WC, et al. (2002) Circulating Epstein-Barr virus DNA in serum of patients with lymphoepithelioma-like carcinoma of the lung: a potential surrogate marker for monitoring disease. *Clin Cancer Res* 8: 986-994.
49. Dyer MD, Murali TM, Sobral BW (2008) The landscape of human proteins interacting with viruses and other pathogens. *PLoS Pathog* 4: e32.

50. Arvin A, Campadelli-Fiume G, Mocarski E, Moore PS, Roizman B, et al. (2007) Human Herpesviruses: Biology, Therapy, and Immunoprophylaxis. Cambridge UK: Cambridge University Press.
51. Slebos RJ, Yi Y, Ely K, Carter J, Evjen A, et al. (2006) Gene expression differences associated with human papillomavirus status in head and neck squamous cell carcinoma. Clin Cancer Res 12: 701-709.
